# Supplementary material for: International clinical practice guidelines for gender minority/trans people: systematic review and quality assessment
Source: PubMed Central journal article supplement — BMJ Open. 2021 Apr 29;11(4):e048943. doi: 10.1136/bmjopen-2021-048943 (PMC8094331; doi:10.1136/bmjopen-2021-048943), 2021-04-29
Supplement: bmjopen-2021-048943.draft_revisions.pdf [file bmjopen-2021-048943.draft_revisions.pdf]

# BMJ Open

BMJ Open is committed to open peer review. As part of this commitment we make the peer review history of every article we publish publicly available.

When an article is published we post the peer reviewers' comments and the authors' responses online. We also post the versions of the paper that were used during peer review. These are the versions that the peer review comments apply to.

The versions of the paper that follow are the versions that were submitted during the peer review process. They are not the versions of record or the final published versions. They should not be cited or distributed as the published version of this manuscript.

BMJ Open is an open access journal and the full, final, typeset and author-corrected version of record of the manuscript is available on our site with no access controls, subscription charges or pay-per-view fees (<http://bmjopen.bmj.com>).

If you have any questions on BMJ Open's open peer review process please email [info.bmjopen@bmj.com](mailto:info.bmjopen@bmj.com)

# BMJ Open

## International Clinical Practice Guidelines for Gender Minority/Trans People: Systematic Review and Quality Assessment

|                               |                                                                                                                                                                                                                                                                                                                                                                                                                                                                                                                                                                                                                                  |
|-------------------------------|----------------------------------------------------------------------------------------------------------------------------------------------------------------------------------------------------------------------------------------------------------------------------------------------------------------------------------------------------------------------------------------------------------------------------------------------------------------------------------------------------------------------------------------------------------------------------------------------------------------------------------|
| Journal:                      | <i>BMJ Open</i>                                                                                                                                                                                                                                                                                                                                                                                                                                                                                                                                                                                                                  |
| Manuscript ID                 | bmjopen-2021-048943                                                                                                                                                                                                                                                                                                                                                                                                                                                                                                                                                                                                              |
| Article Type:                 | Original research                                                                                                                                                                                                                                                                                                                                                                                                                                                                                                                                                                                                                |
| Date Submitted by the Author: | 15-Jan-2021                                                                                                                                                                                                                                                                                                                                                                                                                                                                                                                                                                                                                      |
| Complete List of Authors:     | Dahlen, Sara; King's College London, Department of Global Health & Social Medicine<br>Connolly, Dean; Newham University Hospital NHS Trust; King's College London Institute of Psychiatry Psychology and Neuroscience, Addictions Department<br>Arif, Isra; King's College London<br>Junejo, Muhammad; Chelsea and Westminster Hospital NHS Foundation Trust, Genitourinary Medicine<br>Bewley, Susan; King's College London, Department of Women and Children's Health, School of Life Course Sciences<br>Meads, Catherine; Anglia Ruskin University - Cambridge Campus, Faculty of Health, Medicine, Education and Social Care |
| Keywords:                     | Protocols & guidelines < HEALTH SERVICES ADMINISTRATION & MANAGEMENT, Quality in health care < HEALTH SERVICES ADMINISTRATION & MANAGEMENT, Sexual and gender disorders < PSYCHIATRY, International health services < HEALTH SERVICES ADMINISTRATION & MANAGEMENT                                                                                                                                                                                                                                                                                                                                                                |
|                               |                                                                                                                                                                                                                                                                                                                                                                                                                                                                                                                                                                                                                                  |

SCHOLARONE™  
Manuscripts

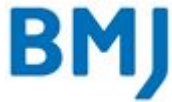

I, the Submitting Author has the right to grant and does grant on behalf of all authors of the Work (as defined in the below author licence), an exclusive licence and/or a non-exclusive licence for contributions from authors who are: i) UK Crown employees; ii) where BMJ has agreed a CC-BY licence shall apply, and/or iii) in accordance with the terms applicable for US Federal Government officers or employees acting as part of their official duties; on a worldwide, perpetual, irrevocable, royalty-free basis to BMJ Publishing Group Ltd ("BMJ") its licensees and where the relevant Journal is co-owned by BMJ to the co-owners of the Journal, to publish the Work in this journal and any other BMJ products and to exploit all rights, as set out in our [licence](#).

The Submitting Author accepts and understands that any supply made under these terms is made by BMJ to the Submitting Author unless you are acting as an employee on behalf of your employer or a postgraduate student of an affiliated institution which is paying any applicable article publishing charge ("APC") for Open Access articles. Where the Submitting Author wishes to make the Work available on an Open Access basis (and intends to pay the relevant APC), the terms of reuse of such Open Access shall be governed by a Creative Commons licence – details of these licences and which [Creative Commons](#) licence will apply to this Work are set out in our licence referred to above.

Other than as permitted in any relevant BMJ Author's Self Archiving Policies, I confirm this Work has not been accepted for publication elsewhere, is not being considered for publication elsewhere and does not duplicate material already published. I confirm all authors consent to publication of this Work and authorise the granting of this licence.

1  
2  
3 1 International Clinical Practice Guidelines for Gender Minority/Trans People: Systematic  
4  
5 2 Review and Quality Assessment  
6  
7  
8  
9

10 4 Sara Dahlen<sup>1</sup>, Bioethics & Society student [s.dahlen@doctors.org.uk](mailto:s.dahlen@doctors.org.uk) ORCID ID 0000-  
11  
12 5 0002-1798-1816  
13

14 6 Dean Connolly<sup>2, 3</sup>, Foundation Doctor and Visiting Researcher [dean.j.connolly@kcl.ac.uk](mailto:dean.j.connolly@kcl.ac.uk)  
15  
16 7 ORCID ID 0000-0002-3139-4263  
17  
18

19 8 Isra Arif<sup>4</sup>, Medical student [isra.arif@kcl.ac.uk](mailto:isra.arif@kcl.ac.uk) ORCID ID 0000-0002-8623-206  
20

21 9 Muhammad Hyder Junejo<sup>5</sup>, Junior Clinical Fellow [muhammad.junejo@nhs.net](mailto:muhammad.junejo@nhs.net) ORCID  
22  
23 10 ID 0000-0003-2458-9991  
24  
25

26 11 Susan Bewley<sup>6</sup>, Professor Emeritus (Honorary) of Obstetrics and Women's Health  
27  
28 12 [susan.bewley@kcl.ac.uk](mailto:susan.bewley@kcl.ac.uk) ORCID ID 0000-0001-8064-652X  
29  
30

31 13 Catherine Meads<sup>7\*</sup>, Professor of Health [catherine.meads@anglia.ac.uk](mailto:catherine.meads@anglia.ac.uk) ORCID ID 0000-  
32  
33 14 0002-2368-0665  
34

35 15 (1) Department of Global Health and Social Medicine, King's College London, Bush  
36  
37 16 House, North East Wing, 40 Aldwych, London, WC2B 4BG, UK  
38  
39

40 17 (2) Newham University Hospital, Glen Rd, London, E13 8SL, UK  
41

42 18 (3) Addictions Department Institute of Psychiatry, Psychology and Neuroscience, King's  
43  
44 19 College London, 4 Windsor Walk, Denmark Hill, London, SE5 8BB, UK  
45  
46

47 20 (4) King's College London, Strand, London, WC2R 2LS, UK  
48

49 21 (5) Genitourinary Medicine, Chelsea and Westminster Hospital NHS Foundation Trust,  
50  
51 22 c/o 56 Dean Street, Soho, London W1D 6AE, UK  
52  
53  
54  
55  
56  
57  
58  
59  
60

1  
2  
3 23 (6) Department of Women and Children's Health, School of Life Course Sciences,  
4  
5 24 King's College London, c/o 10<sup>th</sup> floor North Wing, St Thomas' Hospital, London SE1  
6  
7  
8 25 7EH, UK  
9

10 26 (7) Faculty of Health, Medicine, Education and Social Care, Anglia Ruskin University,  
11  
12 27 East Road, Cambridge, CB1 1PT, UK  
13

14 28 \*Corresponding author and reprint requests: Catherine Meads

15  
16  
17 29 Email: catherine.meads@anglia.ac.uk  
18

19 30 Tel: 07850 864327  
20  
21

22 31

23  
24 32 Short title: Quality of clinical practice guidelines for gender minority/trans people  
25

26 33 Keywords: Gender identity, gender minority, transgender, systematic review, clinical  
27  
28 34 practice guideline, AGREE II, quality appraisal  
29

30 35 Word count: 3,993 excluding acknowledgments, abstract, summary, tables, ethical  
31  
32 36 compliance/ licence statements, references and supplementary material  
33  
34

35 37

36  
37 38 Acknowledgments: We thank Richard Wakeford and Leena Järveläinen (information  
38  
39 39 specialists, British Library and Turku University Library), Gillian Claire Evans (German  
40  
41 40 translations), Sarah Peitzmeier, Sam Winter, Christina Richards and Riittakerttu Kaltiala  
42  
43 41 (opinion leaders), Paul Seed (statistician), researchers who shared copies of their papers,  
44  
45 42 the UK stakeholders who participated in the prioritisation exercise and the peer reviewers  
46  
47 43 whose feedback improved the work.  
48  
49  
50  
51  
52  
53  
54  
55  
56  
57  
58  
59  
60

1  
2  
3 44 **Structured abstract**

4  
5 45 **Objectives:** To identify and critically appraise published clinical practice guidelines  
6  
7 46 (CPGs) regarding health care of gender minority/trans people.

8  
9  
10 47 **Design:** Systematic review and quality appraisal using AGREE II (Appraisal of  
11  
12 48 Guidelines for Research and Evaluation tool), including stakeholder domain  
13  
14 49 prioritisation.

15  
16  
17 50 **Setting:** Six databases and six CPG websites were searched, and international key  
18  
19 51 opinion leaders approached.

20  
21 52 **Participants:** CPGs relating to adults and/or children who are gender minority/trans with  
22  
23 53 no exclusions due to comorbidities, except differences in sex development.

24  
25  
26 54 **Intervention:** Any health-related intervention connected to the care of gender  
27  
28 55 minority/trans people.

29  
30  
31 56 **Main outcome measures:** Number and quality of international CPGs addressing the  
32  
33 57 health of gender minority/trans people, information on estimated changes in mortality or  
34  
35 58 quality of life (QoL), consistency of recommended interventions across CPGs, and  
36  
37 59 appraisal of key messages for patients.

38  
39  
40 60 **Results:** Twelve international CPGs address gender minority/trans people's healthcare as  
41  
42 61 complete (n=5), partial (n=4) or marginal (n=3) focus of guidance. The quality scores  
43  
44 62 have a wide range and heterogeneity whichever AGREE II domain is prioritised. Five  
45  
46 63 higher-quality CPGs focus on HIV and other blood-borne infections (overall assessment  
47  
48 64 scores 69-94%). Six lower-quality CPGs concern transition-specific interventions (overall  
49  
50 65 assessment scores 11-56%). None deal with primary care, mental health, or longer-term  
51  
52 66 medical issues. Sparse information on estimated changes in mortality and QoL is  
53  
54  
55  
56  
57  
58  
59  
60

1  
2  
3 67 conflicting. Consistency between CPGs could not be examined due to unclear  
4  
5 68 recommendations within the World Professional Association of Transgender Health  
6  
7  
8 69 Standards of Care Version 7 and a lack of overlap between other CPGs. None provide  
9  
10 70 key messages for patients.

11  
12 71 **Conclusions:** A paucity of high-quality guidance for gender minority/trans people exists,  
13  
14 72 largely limited to HIV and transition, but not wider aspects of healthcare, mortality or  
15  
16  
17 73 QoL. Reference to AGREE II, use of systematic reviews, independent external review,  
18  
19 74 stakeholder participation and patient facing material might improve future CPG quality.

20  
21 75 **Trial registration:** PROSPERO (CRD42019154361)  
22  
23  
24  
25  
26  
27  
28  
29  
30  
31  
32  
33  
34  
35  
36  
37  
38  
39  
40  
41  
42  
43  
44  
45  
46  
47  
48  
49  
50  
51  
52  
53  
54  
55  
56  
57  
58  
59  
60

1  
2  
3 76 **Article summary**  
4

5 77 **Strengths and limitations of this study**  
6

- 7  
8 78 • First systematic review to identify and use a validated quality appraisal instrument  
9  
10 79 to assess all international CPGs addressing gender minority/trans health.  
11  
12 80 • International CPGs were studied due to their influential status in gender  
13  
14 81 minority/trans health, though further research is needed on national and local  
15  
16 82 CPGs.  
17  
18  
19 83 • An innovative prioritisation exercise was performed to elicit stakeholders'  
20  
21 84 priorities and inform the setting of AGREE II quality thresholds, however those  
22  
23 85 stakeholder priorities may not be applicable outside the UK.  
24  
25  
26 86 • An inclusive approach using wide criteria, extensive searches and approaching  
27  
28 87 key opinion leaders should have allowed the study to identify all relevant  
29  
30 88 international CPGs, however it is possible some may have been missed.  
31  
32  
33  
34  
35  
36  
37  
38  
39  
40  
41  
42  
43  
44  
45  
46  
47  
48  
49  
50  
51  
52  
53  
54  
55  
56  
57  
58  
59  
60



1  
2  
3  
4  
5  
6  
7  
8  
9  
10  
11  
12  
13  
14  
15  
16  
17  
18  
19  
20  
21  
22  
23  
24  
25  
26  
27  
28  
29  
30  
31  
32  
33  
34  
35  
36  
37  
38  
39  
40  
41  
42  
43  
44  
45  
46  
47  
48  
49  
50  
51  
52  
53  
54  
55  
56  
57  
58  
59  
60

## 89 **Introduction**

### 90 *Assessing the quality of clinical practice guidelines*

91 Evidence-based practice integrates best available research with clinical expertise and the  
92 patient's unique values and circumstances. High-quality clinical practice guidelines  
93 (CPGs) support high quality health care delivery. They can guide clinicians and policy  
94 makers to improve care, reduce variation in clinical practice, thereby affecting patient  
95 safety and outcomes. The Institute of Medicine defines CPGs as: "statements that include  
96 recommendations intended to optimise patient care that are informed by a systematic  
97 review of evidence and an assessment of the benefits and harms of alternative care  
98 options"[1], though other definitions exist[2]. Recommendations are used alongside  
99 professional judgement, directly or within decision aids, in training and practice. CPGs  
100 are important but have limitations depending on evidence selection and development  
101 processes[3]. GRADE (Grading of Recommendations, Assessment, Development and  
102 Evaluation) was developed to address the evidence that is selected and appraised during  
103 CPG development[4–6]. Using a systematic approach and transparent framework for  
104 developing and presenting summaries of evidence, GRADE is the most widely adopted  
105 tool worldwide for grading the quality of evidence and making recommendations[7], but  
106 does not alone ensure a CPG is high quality. Strength of evidence is only one component  
107 of what makes a 'good' CPG; factors such as transparency, rigour, independence,  
108 multidisciplinary input, patient and public involvement, avoidance of commercial  
109 influences and rapidity[8,9] should be also considered. Broader domains of CPG quality  
110 are included in the Appraisal of Guidelines for Research and Evaluation instrument  
111 AGREE II[10–12]. Despite widely recognized principles and methods for developing

1  
2  
3 112 sound CPGs, current research shows that guidelines on various topics lack appropriate  
4  
5 113 uptake of systematic review methodologies in their development[13], give  
6  
7  
8 114 recommendations that conflict with scientific evidence[14], or do not adequately take into  
9  
10 115 account existing CPG quality and reporting assessment tools[15]. This emphasizes the  
11  
12 116 ongoing need to appraise guidelines to ensure evidence-informed care.

### 117 *Healthcare for gender minority/trans people*

16  
17 118 ‘Trans’ is an umbrella term for individuals whose inner sense of self (gender identity) or  
18  
19 119 how they present themselves using visual or behavioural cues (gender expression) differs  
20  
21 120 from the expected stereotypes (gender) culturally assigned to their biological sex[16].  
22  
23  
24 121 Gender minority is an often-used alternative population description. Some gender  
25  
26 122 minority/trans people may seek medical transition, which involves interventions such as  
27  
28 123 hormones or surgery that alter physical characteristics and align appearance with gender  
29  
30 124 identity. Patient numbers referred to UK gender identity clinics and length of waiting lists  
31  
32 125 have increased in the last decade, particularly for adolescents[17], a phenomenon seen  
33  
34 126 elsewhere[18]. Gender minority/trans people may have continuing, sometimes complex,  
35  
36 127 life-long healthcare needs whether they undergo medical transition or not. Gender  
37  
38 128 minority/trans people may experience more mental health issues such as mood and  
39  
40 129 anxiety disorders[19], substance use[20], and higher rates of suicidal ideation[21]. They  
41  
42 130 may seek assistance with sexual health, mental health[22], substance use disorders[23],  
43  
44 131 prevention and/or management of HIV[24] as well as usual general health enquiries.  
45  
46  
47 132 However, they may encounter difficulties in accessing healthcare[25], reporting negative  
48  
49 133 healthcare experiences[26], discrimination and stigma[30,31]. Like all individuals,  
50  
51  
52  
53  
54  
55  
56  
57  
58  
59  
60

1  
2  
3 134 gender minority/trans people require high-quality evidence-based healthcare[25,29]  
4  
5 135 addressing general and specific needs.  
6  
7 136 *Guidelines used internationally and in the UK*  
8  
9  
10 137 The quality of current guidelines on gender minority/trans health is unclear. The World  
11  
12 138 Professional Association for Transgender Health (WPATH) Standards of Care Version 7  
13  
14 139 (SOCv7)[30] represent normative standards for clinical care, acting as a benchmark in  
15  
16 140 this field[31]. Globally, many national and local guidelines[32–35] are adaptations of,  
17  
18 141 acknowledge being influenced by, or are intended to complement WPATH SOCv7[30],  
19  
20 142 despite expressed reservations that WPATH SOCv7[30] is based on lower-quality  
21  
22 143 primary research, the opinions of experts and lacks grading of evidence[36].  
23  
24 144 In the UK, an advocacy group worked to incorporate WPATH SOCv7[30] into national  
25  
26 145 practice[37]. WPATH SOCv7[30] informs National Health Service (NHS) gender  
27  
28 146 identity clinics[38] and guidelines produced by the Royal College of Psychiatrists  
29  
30 147 (without use of GRADE)[39]. No CPGs were available from the National Institute for  
31  
32 148 Health and Care Excellence (NICE), Scottish Intercollegiate Guidelines Network (SIGN),  
33  
34 149 British Association of Gender Identity Specialists, British Psychological Society or other  
35  
36 150 medical Royal Colleges, although the Royal College of General Practitioners issued a  
37  
38 151 position statement on gender minority/trans healthcare in 2019[40]. Assessing quality of  
39  
40 152 international CPGs such as WPATH SOCv7[30] has practice implications for the  
41  
42 153 NHS[38] and private sector. CPGs with international scope may present additional  
43  
44 154 challenges (e.g. the implementability of key recommendations might not be easily  
45  
46 155 translated among different contexts) but they seem to influence discourse around gender  
47  
48 156 minority/trans health[36]. No prior study has investigated the number and quality of  
49  
50  
51  
52  
53  
54  
55  
56  
57  
58  
59  
60

1  
2  
3 157 guidelines to support the care and well-being of gender minority/trans people. The  
4  
5 158 purpose of this research was to identify and critically appraise all published international  
6  
7  
8 159 CPGs for the healthcare of gender minority/trans people.  
9

10 160

## 11 161 **Methods**

### 12 162 *Approach/ Research Design*

13  
14  
15 163 The rationale was to identify the key CPGs available to healthcare practitioners in this  
16  
17 164 field of clinical practice. Following preliminary searches, we chose international CPGs in  
18  
19 165 view of WPATH's influence within the UK and elsewhere, and to avoid 'double-  
20  
21 166 counting'. We considered AGREE II[10–12] the most appropriate tool; it is the most  
22  
23 167 comprehensively validated and evaluated instrument available for assessing  
24  
25 168 CPGs[41,42], designed for use by non-expert stakeholders[10] such as healthcare  
26  
27 169 providers, practicing clinicians and educators[11]. It benefits from clear instructions and  
28  
29 170 prompts regarding scoring and several people applying the criteria independently.  
30  
31 171 AGREE II synthesis calculates quality scores from 23 appraisal criteria organised into six  
32  
33 172 key domains (scope and purpose, stakeholder involvement, rigour of development, clarity  
34  
35 173 of presentation, applicability, editorial independence) and an overall assessment of  
36  
37 174 "Recommend for use?" (Answer options; yes, no, yes if modified). This systematic  
38  
39 175 review was conducted according to a pre-specified PROSPERO protocol  
40  
41 176 (CRD42019154361)  
42  
43 177 [https://www.crd.york.ac.uk/prospero/display\\_record.php?RecordID=154361](https://www.crd.york.ac.uk/prospero/display_record.php?RecordID=154361) uploaded  
44  
45 178 19<sup>th</sup> December 2019. The MEDLINE strategy was straightforward; although not formally  
46  
47 179 processed[43], it was peer-reviewed by one information specialist.  
48  
49  
50  
51  
52  
53  
54  
55  
56  
57  
58  
59  
60

1  
2  
3 180  
4

5 181 *Inclusion and exclusion criteria*  
6

7  
8 182 We defined CPGs as a systematically developed set of recommendations that assist  
9  
10 183 practitioners and patients in the provision of healthcare in specific circumstances,  
11  
12 184 produced after review and assessment of available clinical evidence[1,2,44–46]. CPGs  
13  
14 185 published after 1<sup>st</sup> January 2010 were eligible if they (or part thereof) specifically targeted  
15  
16 186 patients/population with gender minority/trans status and/or gender dysphoria, were  
17  
18 187 evidence-based, with some documentation of development methodology, had  
19  
20 188 international scope (more than one country, defined as a Member State of the United  
21  
22 189 Nations), and were an original source. We chose the timeframe to focus on the most  
23  
24 190 recent guidelines, currently applicable to practice, and to include WPATH SOCv7[30].  
25  
26 191 CPGs were eligible if they met the following inclusion criteria: participants/population  
27  
28 192 was adults and/or children who are gender minority/trans with no exclusion due to  
29  
30 193 comorbidities or age although differences/disorders in sex development (intersex) were  
31  
32 194 excluded; exposure/intervention was any health intervention related to gender dysphoria  
33  
34 195 or gender affirmation, or health concerns of gender minority/trans people, including  
35  
36 196 screening, assessment, referral, diagnosis and interventions. We used broad criteria  
37  
38 197 because terminology has been in flux with changes made in both ICD and DSM  
39  
40 198 diagnostic criteria[16]. There were no restrictions on setting or language.  
41  
42  
43  
44

45  
46  
47 199 *Search strategy and guideline selection*  
48

49 200 We conducted the searches up to 11<sup>th</sup> June 2020 (CM), using search terms and  
50  
51 201 appropriate synonyms (as MeSH terms and text words) that we developed based on  
52  
53 202 population and exposures (Web/Supplementary Table 1). We searched six databases  
54  
55  
56  
57  
58  
59  
60

1  
2  
3 203 (EMBASE, MEDLINE, Web of Science, PsycINFO, CINAHL, LILACS) and six CPG  
4  
5 204 websites (Agency for Healthcare Research and Quality National Guideline Clearinghouse  
6  
7 205 [NGC], eGuidelines and Guidelines, National Institute for Health and Care Excellence  
8  
9  
10 206 National Library for Health, Scottish Intercollegiate Guidelines Network, EBSCO  
11  
12 207 DynaMed Plus, Guidelines International Network Library) and the World Health  
13  
14 208 Organisation (WHO). The NGC closed in 2017 but CM hand-searched the archive. In  
15  
16 209 addition to protocol, individual reviewers (IA, DC, MJ) hand-searched four specialty  
17  
18 210 journals (International Journal of Transgender Health, Transgender Health, LGBT  
19  
20 211 Health, Journal of Homosexuality). In order to find potential grey literature CPGs outwith  
21  
22 212 the scholarly literature, two reviewers (IA, SD) independently performed four separate  
23  
24 213 Google searches (not GoogleScholar as mistated in the protocol) by using one generic  
25  
26 214 (clinical practice guidelines) plus one specific term (transgender, gender dysphoria, trans  
27  
28 215 health, or gender minority) and examining the first 100 hits. We identified International  
29  
30 216 Key Opinion Leaders via publications known to reviewers (DC, SD) (n=24) and  
31  
32 217 contacted them via one email and reminder to identify further guidelines. Reference lists  
33  
34 218 of relevant reviews and all full-text studies were hand-searched to identify any relevant  
35  
36 219 papers or CPGs not found by database searching. Two reviewers (SB, SD) independently  
37  
38 220 read all titles and abstracts and assessed for inclusion. If there was uncertainty or  
39  
40 221 disagreement, or reasonable suspicion that the full-text might lead to another relevant  
41  
42 222 CPG, the full-text was obtained. Non-English abstracts were Google-translated but if a  
43  
44 223 possible CPG could not be reliably excluded, the full-text paper was obtained and  
45  
46 224 translated. Where full-text publications could not be accessed, we contacted authors  
47  
48 225 directly. Two reviewers (SB and either DC/MJ) independently carried out full-text  
49  
50  
51  
52  
53  
54  
55  
56  
57  
58  
59  
60

1  
2  
3 226 assessment to determine inclusion or exclusion from the systematic review based on the  
4  
5 227 above criteria, and noted reasons for excluding full-texts. The whole team discussed  
6  
7 228 uncertainties and disagreements to achieve consensus, with voting and final adjudication  
8  
9  
10 229 by the senior author (CM).

11  
12 230 *Data extraction*

13  
14 231 Two reviewers (SB, SD) independently collected formal descriptive data of included  
15  
16 232 CPGs. All ambiguities or discrepancies were referred to the team for discussion and to re-  
17  
18 233 examine original texts and extract data. Information collected was title, author, year of  
19  
20 234 publication, number of countries covered, originating organisation, audience, methods  
21  
22 235 used, page and reference numbers (excluding accompanying materials), and funding. Key  
23  
24 236 recommendations were extracted for comparison between CPGs. We searched for all text  
25  
26 237 mentions of mortality or any measures of quality of life (QoL), and noted if accompanied  
27  
28 238 by a citation. All patient facing material was extracted. In addition, we extracted data  
29  
30 239 about publication outlet (journal/website), and whether the quantity of information  
31  
32 240 pertaining to the health of gender minority/trans people represented a complete, partial or  
33  
34 241 marginal proportion of recommendations in the CPG.

35  
36  
37  
38 242 *Outcomes*

39  
40 243 Outcomes were: the number and quality assessment (using AGREE II) of international  
41  
42 244 CPGs addressing the health of gender minority/trans people; analysis and comparison of  
43  
44 245 the presence or absence of information on estimated changes in mortality or QoL (any  
45  
46 246 measure) following any specific recommended intervention, over any time interval; the  
47  
48 247 consistency (or lack thereof) of recommendations across the CPGs; and the presence (or  
49  
50 248 absence) of key messages for patients.  
51  
52  
53  
54  
55  
56  
57  
58  
59  
60

1  
2  
3 249 *Quality assessment*  
4

5 250 All authors completed AGREE II video training, a practice assessment, and two pilots  
6  
7  
8 251 whose results were discussed. The six reviewers independently and anonymously  
9  
10 252 completed quality scoring by using the standard proforma (myAgree Plus platform,  
11  
12 253 AGREE Enterprise website)[11].  
13

14  
15 254 *Patient and Public Involvement*  
16

17 255 The AGREE II instrument generates quality scores but does not set specific parameters  
18  
19 256 for what constitutes high quality, recommending that decisions about defining such  
20  
21 257 thresholds should be made prior to performing appraisals, considering relevant  
22  
23 258 stakeholders and the context in which the CPG is used[11]. To help set quality thresholds,  
24  
25 259 we conducted an AGREE II domain prioritisation exercise in January 2020 via email,  
26  
27 260 with one reminder. It was considered impossible to ensure comprehensive representation  
28  
29 261 of international stakeholders. We chose the UK for feasibility, albeit validity might be  
30  
31 262 limited to the NHS. Fifty-two UK service-user stakeholder groups and gender  
32  
33 263 minority/trans advocacy organisations, identified via reviewer knowledge and internet  
34  
35 264 searches (IA, SB, DC, SD, MJ, CM), were informed about the study. They were invited  
36  
37 265 to participate in a stakeholder prioritisation of the AGREE II domains, created using  
38  
39 266 SurveyMonkey® and with an option to remain anonymous  
40  
41 267 (<https://www.surveymonkey.co.uk/r/WLZ55NQ> gives invitation wording, links to  
42  
43 268 resources and protocol). The reviewer team performed an anonymous prioritisation for  
44  
45 269 comparison.  
46  
47  
48  
49

50  
51 270 *Strategy for Data and Statistical Analyses*  
52  
53  
54  
55  
56  
57  
58  
59  
60



1  
2  
3 271 Simple frequencies were used to present the stakeholder and reviewer priorities, and  
4  
5 272 outcomes. Following team discussion of the prioritisation exercise results, no pre-  
6  
7 273 specified quality threshold score was used to define high or low quality, although colour  
8  
9 274 was superimposed ( $\leq 30\%$ , 31-69% and  $\geq 70\%$ ) on the final scores table to aid visual  
10  
11 275 comparisons and interpretation.  
12  
13  
14  
15 276

## 17 277 **Results**

### 19 278 *Search results*

21 279 Figure 1 (PRISMA flow chart[47]) shows that 1,815 citations were identified, of which  
22  
23 280 134 full-text publications were read (all available, three supplied by authors) and 122  
24  
25 281 excluded (Supplementary Table W2 with reasons).  
26  
27

### 28 282 *Data extraction*

30 283 Table 1 shows the characteristics of the CPGs. Supplementary Tables W3 and W4 show  
31  
32 284 raw data of key recommendations and mortality and QoL evidence.  
33  
34

### 35 285 *Number and characteristics of Clinical Practice Guidelines*

37 286 Twelve CPGs (Table 1) originated from: WHO (n=3)[48–50], WPATH (n=2)[30,51],  
38  
39 287 professional specialist/special-interest societies (n=4)[52–55], small groups of experts  
40  
41 288 (n=2)[56,57] and one consortium[58]. All were published in English, in journals[51–57],  
42  
43 289 the organisation's website[48–50,58], or both[30]. Guideline development methodology  
44  
45 290 was variable, including use of systematic reviews (Table 1). Ten CPGs had no external  
46  
47 291 review, eight had no update plans. Gender minority/trans health recommendations made  
48  
49 292 up complete (n=5)[30,51,53,55,57], partial (n=4)[48–50,56] or marginal (n=3)[52,54,58]  
50  
51  
52  
53 293 focus of content. CPGs contained 10 to 155 pages, and 20 to 505 references. Funding  
54  
55  
56  
57  
58  
59  
60

1  
2  
3 294 sources were wide-ranging and sometimes multiple, from government agencies,  
4  
5 295 professional societies, charities and private donations. Two CPGs provided no funding  
6  
7  
8 296 details[52,56].  
9  
10  
11  
12  
13  
14  
15  
16  
17  
18  
19  
20  
21  
22  
23  
24  
25  
26  
27  
28  
29  
30  
31  
32  
33  
34  
35  
36  
37  
38  
39  
40  
41  
42  
43  
44  
45  
46  
47  
48  
49  
50  
51  
52  
53  
54  
55  
56  
57  
58  
59  
60

1  
2  
3  
4  
5  
6  
7  
8  
9  
10  
11  
12  
13  
14  
15  
16  
17  
18  
19  
20  
21  
22  
23  
24  
25  
26  
27  
28  
29  
30  
31  
32  
33  
34  
35  
36  
37  
38  
39  
40  
41  
42  
43  
44  
45  
46  
47

297 **Table 1. General characteristics of included Clinical Practice Guidelines (n = 12)**  
298

| Number | Author (year)          | Full title                                                                                                            | Countries covered | Origin                                   | Primary Audience                                                                                                                            | Design (systematic review, SR, used and methods thereafter)                                                                                                          | Planned update given      | Funding                                                           |
|--------|------------------------|-----------------------------------------------------------------------------------------------------------------------|-------------------|------------------------------------------|---------------------------------------------------------------------------------------------------------------------------------------------|----------------------------------------------------------------------------------------------------------------------------------------------------------------------|---------------------------|-------------------------------------------------------------------|
| 1      | Coleman et al. (2012)  | Standards of care for the health of transsexual, transgender, and gender nonconforming people v7                      | Global            | WPATH                                    | Health professionals                                                                                                                        | Work groups submit manuscripts based on prior literature reviews, no explicit links of recommendations to evidence, expert consensus. No independent external review | No                        | Tawani Foundation and gift from anonymous donor                   |
| 2      | Davies et al. (2015)   | Voice and communication change for gender nonconforming individuals: giving voice to the person inside                | Global            | WPATH                                    | Speech-language therapists                                                                                                                  | Review of evidence. Expert consensus. No independent external review                                                                                                 | No                        | Transgender Health Information Program of British Columbia Canada |
| 3      | ECDC (2018)            | Public health guidance on HIV, hepatitis B and C testing in the EU/EEA                                                | EU/ EEA           | ECDC consortium CHIP, PHE, SSAT and EATG | Member States' Public Health Professionals who coordinate the development of national guidelines or programmes for HBV, HCV and HIV testing | 4 SRs, SIGN, NICE and AXIS checklists. Ad hoc internal and external expert panel, independent chair, expert consensus. No independent external review                | No                        | Commissioned by ECDC, contractor Rigshospitalet CHIP              |
| 4      | Gilligan et al. (2017) | Patient-clinician communication: American Society of Clinical Oncology consensus guideline                            | USA and others    | ASCO                                     | Clinicians who care for adults with cancer                                                                                                  | 9 questions (1 SR), expert consensus and a Delphi exercise. No independent external review                                                                           | Regular review 3 yr check | None declared                                                     |
| 5      | Hembree et al. (2017)  | Endocrine treatment of gender-dysphoric/ gender-incongruent persons: An Endocrine Society clinical practice guideline | Global            | Endocrine Society                        | Endocrinologists, trained mental health professionals and trained physicians                                                                | 2 SRs and GRADE, rest expert consensus. No independent external review                                                                                               | No                        | Endocrine Society                                                 |
| 6      | IAPHCCO (2015)         | IAPAC Guidelines for optimizing the HIV care continuum for adults and adolescents                                     | Global            | IAPAC                                    | Care providers, program managers, policymakers, affected communities, organizations, and health systems involved with                       | A systematic search of CDC database, expert consensus. No independent external review                                                                                | No                        | IAPAC, US NIH and Office of AIDS Research                         |

|    |                      |                                                                                                                                                                                                             |                                           |              |                                                                                                                                                                      |                                                                                                           |                            |                                               |
|----|----------------------|-------------------------------------------------------------------------------------------------------------------------------------------------------------------------------------------------------------|-------------------------------------------|--------------|----------------------------------------------------------------------------------------------------------------------------------------------------------------------|-----------------------------------------------------------------------------------------------------------|----------------------------|-----------------------------------------------|
|    |                      |                                                                                                                                                                                                             |                                           |              | implementing HIV programs and/or delivering HIV care                                                                                                                 |                                                                                                           |                            |                                               |
| 7  | Ralph et al. (2010)  | Trauma, gender reassignment and penile augmentation                                                                                                                                                         | Not specified (international publication) | Author group | Not stated (urological surgeons)                                                                                                                                     | No SR. Unclear if literature review. Leading experts' consensus opinion. No independent external review   | No                         | None declared                                 |
| 8  | Strang et al. (2016) | Initial clinical guidelines for co-occurring autism spectrum disorder and gender dysphoria or incongruence in adolescents                                                                                   | Not specified (international publication) | Author group | Clinicians                                                                                                                                                           | No SR or literature review. 2-stage Delphi consensus. No independent external review                      | No                         | Isadore and Bertha Gudelsky Family Foundation |
| 9  | T'SJoen              | ESSM Position Statement "Assessment and hormonal management in adolescent and adult trans people, with attention for sexual function and satisfaction"                                                      | Europe                                    | ESSM         | European clinicians working in transgender health, sexologists and other health-care professionals                                                                   | No SR. Leading experts' consensus opinion. No independent external review                                 | No                         | ESSM                                          |
| 10 | WHO (2011)           | Prevention and treatment of HIV and other sexually transmitted infections among men who have sex with men and transgender people. Recommendations for a public health approach                              | Global                                    | WHO          | National public health officials and managers of HIV/AIDS and STI programmes, NGOs inc. community and civil society organizations, and health workers                | 13 SRs for PICOs and GRADE, external GDG, and independent external review                                 | Yes in 2015                | BMZ & PEPFAR through CDC & USAID              |
| 11 | WHO (2012)           | Guidance on oral pre-exposure prophylaxis for serodiscordant couples, men and transgender women who have sex with men at high risk of HIV. Recommendations for use in the context of demonstration projects | Global                                    | WHO          | Countries/ Member States                                                                                                                                             | 4 SRs (inc values and preferences reviews) and GRADE, external GDG, and independent external review group | Yes in 2015                | Bill and Melinda Gates Foundation             |
| 12 | WHO (2016)           | Consolidated guidelines on HIV prevention, diagnosis, treatment and care for key populations. 2016 update                                                                                                   | Global                                    | WHO          | National HIV programme managers and other decision-makers within ministries of health and those responsible for health policies, programmes and services in prisons. | 2 new SRs in revised guidance, GRADE, external GDGs, and 79 independent external peer reviewers           | Regular updates; no detail | UNAIDS, PEPFAR, Global Fund                   |

299 **Key:** AACE, American Association of Clinical Endocrinologists; ASA, American Society of Andrology; ASCO, American Society of Clinical Oncology; ASD, autism spectrum  
300 disorder; AXIS, Appraisal Tool for Cross-Sectional Studies; BMZ, German Federal Ministry for Economic Cooperation and Development; CDC, the Centers for Disease Control  
301 and Prevention; CHIP, CHIP/Region H, Rigshospitalet, University of Copenhagen; CPG, clinical practice guideline; EATG, European Aids Treatment Group; EAU, European

1  
2  
3  
4  
5  
6  
7  
8  
9  
10  
11  
12  
13  
14  
15  
16  
17  
18  
19  
20  
21  
22  
23  
24  
25  
26  
27  
28  
29  
30  
31  
32  
33  
34  
35  
36  
37  
38  
39  
40  
41  
42  
43  
44  
45  
46  
47

302 Association of Urology; ECDC, European Centre for Disease Prevention and Control; ESE, European Society of Endocrinology; ESPE, European Society for Pediatric  
303 Endocrinology; ESSM, European Society for Sexual Medicine EU/EEA, European Union/ European Economic Area; Global Fund, Global Fund to Fight AIDS, Tuberculosis and  
304 Malaria; GDG, guideline development group; GRADE, Grading of Recommendations, Assessment, Development, and Evaluation; IAPAC, International Association of Providers of  
305 AIDS Care; IAPHCCO, International advisory panel on HIV care continuum optimization; NGO non governmental organisations; NICE, National Institute of Health and Care  
306 Excellence; NIH, National Institutes of Health; PEPFAR, US President's Emergency Plan for AIDS Relief; PES Pediatric Endocrine Society; PHE, Public Health England; SIGN,  
307 Scottish Intercollegiate Guidelines Network; SR, systematic review; SSAT, St Stephen's AIDS Trust; UNAIDS, The Unified Budget, Results and Accountability Framework of the  
308 Joint United Nations Programme on HIV/AIDS; USA, United States of America; USAID, US Agency for International Development; WHO, World Health Association; WPATH,  
309 World Professional Association for Transgender Health.  
310

For peer review only

1  
2  
3 311 A thirteenth CPG was excluded post-scoring as it had been superseded by a 2020 version  
4  
5 312 without recommendations for gender minority/trans people[59]. It was arguable if four  
6  
7 313 included CPGs did meet criteria: one had not been withdrawn[48]; one contained  
8  
9 314 minimal relevant content[52]; one might not have been intended as a CPG[30] (although  
10  
11 315 WPATH SOCV7's stated overall goal is "to provide clinical guidance for health  
12  
13 316 professionals"[30] it contains no list of key recommendations nor auditable quality  
14  
15 317 standards, yet is widely used to compare procedures covered by US providers[60,61]);  
16  
17 318 one variously described itself as 'position statement' and 'position study' (stating it did  
18  
19 319 "not aim to provide detailed clinical guidelines for professionals such as...  
20  
21 320 [named][30,53]", but evidence was obviously linked to key recommendations for  
22  
23 321 clinicians[55]). After discussion it was decided not to exclude these borderline CPGs, as  
24  
25 322 the definition of CPG in the protocol was intended to favour an inclusive approach.  
26  
27  
28  
29

### 30 323 *Quality prioritisation and assessment*

31  
32  
33 324 Results of the domain prioritisation by stakeholders (n=19 replies, response rate 39%  
34  
35 325 excluding 3 'undeliverable') and reviewers (n=6) showed that stakeholders prioritised  
36  
37 326 stakeholder involvement, whereas the research team prioritised methodological rigour  
38  
39 327 (Supplementary Table W5). No stakeholder asked for clarification or more information.  
40  
41 328 Table 2 shows AGREE II scores by domain (8-94%), and overall (11-94%). The quality  
42  
43 329 scores have a wide range and heterogeneity. Five CPGs focused on trans people as a key  
44  
45 330 population for HIV and other blood-borne infections (overall assessment scores 69-94%).  
46  
47 331 Six CPGs concerned transition-specific interventions (overall assessment scores 11-56%).  
48  
49 332 Transition-related CPGs tended to lack methodological rigour and rely on patchier,  
50  
51 333 lower-quality primary research. The two prioritised domain scores were usually  
52  
53  
54  
55  
56  
57  
58  
59

1  
2  
3 334 comparable with the overall AGREE II quality assessment (ranges; stakeholder  
4  
5 335 involvement 14-93%, methodological rigour 17-87%). Four CPGs obtained a majority  
6  
7 336 opinion 'recommend for use'[48-50,58], five CPGs had unanimous 'do not  
8  
9  
10 337 recommend'[30,51,55-57], and three had minority support with division about the extent  
11  
12 338 of 'yes, if modified' [52-54](Table 2). Despite wide variation there was a pattern; HIV  
13  
14 339 and blood-borne infection guidelines[48-50,54,58] were higher quality, and those  
15  
16 340 focusing on transition were lower quality[30,53,55-57].  
17  
18  
19  
20  
21  
22  
23  
24  
25  
26  
27  
28  
29  
30  
31  
32  
33  
34  
35  
36  
37  
38  
39  
40  
41  
42  
43  
44  
45  
46  
47  
48  
49  
50  
51  
52  
53  
54  
55  
56  
57  
58  
59  
60

341 **Table 2. AGREE II domain percentages and overall assessment of included guidelines, and summary of**  
 342 **mortality/quality of life measures (n = 12)**  
 343

| Number | Author (year)          | Scope and purpose | Stakeholder Involvement | Rigour of development | Clarity and presentation | Applicability | Editorial independence | Overall Assessment | Recommendation to use       | Mortality | Quality of Life | Mortality (any comment) and Quality of Life (any formal measure)                                                                                                                                  |
|--------|------------------------|-------------------|-------------------------|-----------------------|--------------------------|---------------|------------------------|--------------------|-----------------------------|-----------|-----------------|---------------------------------------------------------------------------------------------------------------------------------------------------------------------------------------------------|
| 1      | Coleman et al. (2012)  | 63%               | 47%                     | 20%                   | 37%                      | 16%           | 15%                    | 31%                | Yes 0 No 5<br>If modified 1 | Y         | Y               | M: Higher in post SRS vs matched no SRS, and both pre and post SRS vs. gen popn. QoL: FtM < gen popn, FtM post breast/chest surgery > not surgery, mixed results at 15 yrs.                       |
| 2      | Davies et al. (2015)   | 62%               | 38%                     | 17%                   | 61%                      | 28%           | 14%                    | 28%                | Yes 0 No 3<br>If modified 3 | N         | Y               | QoL: A voice-related TG QoL measure correlated with own and others' perception.                                                                                                                   |
| 3      | ECDC (2018)            | 94%               | 56%                     | 55%                   | 76%                      | 68%           | 38%                    | 69%                | Yes 4 No 0<br>If modified 2 | Y         | Y               | M: Reduced by early diagnosis. QoL: Cost/QALY in anti-HCV birth cohort screening is acceptable. Universal offer HIV testing in hospital settings is highly cost effective.                        |
| 4      | Gilligan et al. (2017) | 84%               | 67%                     | 66%                   | 81%                      | 47%           | 61%                    | 78%                | Yes 2 No 0<br>If modified 4 | N         | N               |                                                                                                                                                                                                   |
| 5      | Hembree et al. (2017)  | 65%               | 40%                     | 41%                   | 73%                      | 29%           | 65%                    | 56%                | Yes 1 No 2<br>If modified 3 | Y         | Y               | M: TW/TM's CV mortality same ("insufficient very low quality data" for TM) and younger age at death after SRS. QoL: long term psychological and psychiatric issues post SRS.                      |
| 6      | IAPHCCO (2015)         | 85%               | 56%                     | 61%                   | 87%                      | 40%           | 63%                    | 81%                | Yes 3 No 0<br>If modified 3 | Y         | Y               | M: Lower if early ART, easy access, immediate ART, and community distribution. QoL: ART preserves QoL, and stigma and mental health impact on QoL.                                                |
| 7      | Ralph et al. (2010)    | 45%               | 14%                     | 19%                   | 64%                      | 5%            | 32%                    | 28%                | Yes 0 No 5<br>If modified 1 | N         | N               |                                                                                                                                                                                                   |
| 8      | Strang et al. (2016)   | 57%               | 33%                     | 19%                   | 39%                      | 8%            | 25%                    | 11%                | Yes 0 No 6<br>If modified 0 | N         | N               |                                                                                                                                                                                                   |
| 9      | T'Sjoen et al. (2020)  | 59%               | 37%                     | 35%                   | 58%                      | 15%           | 33%                    | 42%                | Yes 0 No 4<br>If modified 2 | N         | Y               | QoL: Sexual life improves after GAMI, but not to non-TG levels.                                                                                                                                   |
| 10     | WHO (2011)             | 94%               | 89%                     | 87%                   | 86%                      | 64%           | 82%                    | 83%                | Yes 5 No 0<br>If modified 1 | Y         | Y               | M: Looked for mortality evidence but none found. QoL: Positive QALYs if HIV averted.                                                                                                              |
| 11     | WHO (2012)             | 85%               | 60%                     | 81%                   | 76%                      | 41%           | 72%                    | 72%                | Yes 4 No 0<br>If modified 2 | N         | Y               | QoL: Positive QALYs modelled if PrEP.                                                                                                                                                             |
| 12     | WHO (2016)             | 94%               | 93%                     | 81%                   | 89%                      | 84%           | 65%                    | 94%                | Yes 5 No 0<br>If modified 1 | Y         | N               | M: Lower if access and adhere to OST and at prison release, if early ART and complete TB Rx, HBV/ HCV managed; and access to post abortion care. Worse if food insecure, poor nutrition, low BMI. |



1  
2  
3  
4  
5  
6  
7  
8  
9  
10  
11  
12  
13  
14  
15  
16  
17  
18  
19  
20  
21  
22  
23  
24  
25  
26  
27  
28  
29  
30  
31  
32  
33  
34  
35  
36  
37  
38  
39  
40  
41  
42  
43  
44  
45  
46  
47

344 **Key:** ART, antiretroviral therapy; CV, cardiovascular; ECDC, European Centre for Disease Prevention and Control; FtM, female-to-male; gen popn, general population; GAMI,  
345 gender affirming medical intervention; HBV, hepatitis B virus; HCV, hepatitis C virus; HIV, human immuno-deficiency virus; IAPHCCO, International advisory panel on HIV care  
346 continuum optimization; M, mortality; OST, opiate substitute therapy; PrEP, pre-exposure prophylaxis; QALY, quality adjusted life year; QoL, Quality of life; Rx, treatment; SR,  
347 systematic review; SRS, sex reassignment surgery; TB, tuberculosis; TG, trans people/gender-minority; TM, trans man; TW, trans woman; WHO, World Health Association. Two  
348 prioritised domains for **stakeholders** and **research team**. Colours to aid interpretation (not thresholds) ≤30 **RED**, 31-69 **AMBER**, ≥70 **GREEN**

For peer review only

1  
2  
3 349 *Content*  
4

5 350 Four CPGs concerning HIV prevention, transmission and care[48–50,54], and one public  
6  
7 351 health guideline on population screening for blood-borne viruses[58], contained  
8  
9 352 recommendations for gender minority/trans people as a ‘key population’. Three CPGs  
10  
11 353 were devoted to overall transition care for all gender minority/trans people[30,53,55], two  
12  
13 354 to an aspect of transition[51,56], and one to transition in a specific group[57]. One  
14  
15 355 oncology communication guideline contained a single recommendation relating to gender  
16  
17 356 minority/trans people[52]. No international guidelines were found that addressed primary  
18  
19 357 care, psychological support/mental health interventions, or general medical/chronic  
20  
21 358 disease care (such as cardiovascular, cancer or elderly care).  
22  
23  
24  
25

26 359 *Mortality and Quality of Life*  
27

28 360 Six CPGs referred to mortality[30,48,50,53,54,58] and eight to QoL[30,48,49,51,53–  
29  
30 361 55,58] (Table 2). Supplementary Table W4 shows all extractions of sentences relating to  
31  
32 362 mortality or morbidity, associated references and which CPGs included no such data.  
33  
34 363 More robust evidence was linked to the recommendations in the HIV and blood-borne  
35  
36 364 virus CPGs whereas there was little, inconsistent data and poorer linking to evidence in  
37  
38 365 transition-related CPGs.  
39  
40  
41

42 366 *Consistency of recommendations across the CPGs*  
43

44 367 Supplementary Table W5 contains all extracted key recommendations where these could  
45  
46 368 be distinguished. It shows little overlap of topic content across the CPGs. Many  
47  
48 369 recommendations in WHO 2011[48] and 2016[50] were similar, but not identical, the  
49  
50 370 former not being stood down after the latter was published. No statements were  
51  
52 371 highlighted by the WPATH SOCV7[30] authors as key recommendations, and it proved  
53  
54  
55  
56  
57  
58  
59  
60

1  
2  
3 372 impossible for all six reviewers independently performing data extraction to identify  
4  
5 373 them. The total number of extracted recommendations ranged between 0 to 168 with little  
6  
7 374 consistency or agreement on what passages were selected. Some extracted statements  
8  
9 375 might have been intended as recommendations or standards, but many were flexible,  
10  
11 376 disconnected from evidence and could not be used by individuals or services to  
12  
13 377 benchmark practice. After discussion of this incoherence within WPATH SOCv7[30] and  
14  
15 378 our inability therefore to compare recommendations across all CPGs, it was decided not  
16  
17 379 to revisit inclusions post hoc but to abandon this protocol aim.  
18  
19

20  
21 380 *Patient facing material*

22  
23  
24 381 No patient-facing material was found in any guideline.  
25  
26

27 382

28 383 **Discussion**

29  
30  
31 384 *Statement of principal findings*

32  
33 385 Variable quality international CPGs regarding gender minority/trans people's healthcare  
34  
35 386 contain little, conflicting information on mortality and QoL, no patient facing messages  
36  
37 387 and inconsistent use of systematic reviews in generating recommendations. A major  
38  
39 388 finding is that the scope of the guidelines is confined to HIV/STI prevention or  
40  
41 389 management of transition with an absence of guidelines relating to other medical issues.  
42  
43 390 WPATH SOCv7[30] cannot be considered 'gold standard'.  
44  
45

46  
47 391 *Strengths and weaknesses of this study*

48  
49 392 Strengths include protocol preregistration, stakeholder involvement, piloting all stages, an  
50  
51 393 extensive systematic search without language restriction for any relevant current  
52  
53 394 guidelines, wide inclusion criteria including grey literature, use of key opinion leaders,  
54  
55  
56  
57  
58  
59

1  
2  
3 395 close attention to avoidance of bias, double full-text reading and data entry, and careful  
4  
5 396 presentation of results. Six trained reviewers, exceeding AGREE II  
6  
7 397 recommendations[11], compensated for expected variation in scoring. Extensive searches  
8  
9 398 should have mitigated loss of CPGs. Limitations include some uncertainty about  
10  
11 399 stakeholder understanding despite a good response rate, and generalisability of the  
12  
13 400 prioritisation only to the UK; stakeholders elsewhere might have different priorities.  
14  
15 401 Focusing only on international CPGs might have missed higher quality national and local  
16  
17 402 CPGs derived from them or written de novo. The social acceptance and consequent  
18  
19 403 healthcare system coverage of gender minority/trans health related interventions vary  
20  
21 404 among different countries, which may limit the space for international and multinational  
22  
23 405 guidelines. While the search strategy yielded an oncology communication CPG with a  
24  
25 406 single recommendation for gender minority/trans people[52], other general health CPGs  
26  
27 407 with similar solo statements might have been missed.

32  
33 408 *Comparison with other studies, discussing important differences in results*

34  
35 409 This is the first systematic review using a validated quality appraisal instrument of  
36  
37 410 international CPGs addressing gender minority/trans health. It may act as a benchmark to  
38  
39 411 monitor and improve population healthcare. CPG quality results correspond with, and  
40  
41 412 quantitatively confirm, previously noted concerns about the evidence-base[36,62,63] and  
42  
43 413 variable use of quality assessment in systematic reviews[64–66], in a healthcare field  
44  
45 414 with unknown or unclear longitudinal outcomes[17]. AGREE II has been applied to  
46  
47 415 CPGs in other medical areas, including cancer[67], diabetes[68], pregnancy[69] and  
48  
49 416 depression[70]. These exercises tend to show room for improvement. Developers have  
50  
51 417 been criticised for not using methodological rigour when writing reliable evidence-based  
52  
53  
54  
55  
56  
57  
58  
59

1  
2  
3 418 guidelines[71], as well as not implementing high-quality CPGs[72]. Thus, finding poor  
4  
5 419 quality CPGs is not confined to this area of healthcare[73]. Improvement messages are  
6  
7  
8 420 generalisable to other specialties.

9  
10 421 *Meaning of the study: possible explanations*

11  
12 422 The finding of higher-quality, but narrow, focus on gender minority/trans people's  
13  
14 423 healthcare for blood-borne infections may relate to the global HIV pandemic and the  
15  
16  
17 424 WHO applying twin lenses of public health and human rights (i.e. the population as  
18  
19 425 'means' and 'ends'). The lower-quality CPGs focus on transition. WPATH SOCv7[30]  
20  
21 426 originated nearly a decade ago from a special-interest association, diagnostic criteria and  
22  
23  
24 427 CPG methodology have since changed. Although HIV and transition are important, it is  
25  
26 428 puzzling to have found so little else, maybe suggesting CPGs for gender minority/trans  
27  
28 429 people have been driven by provider-interests rather than healthcare needs. Including  
29  
30  
31 430 gender minority/trans people in guidelines can be considered a matter of health equity,  
32  
33 431 where CPGs have a role to play[74]. GRADE suggests CPG developers may consider  
34  
35 432 equity at various stages in creating guidelines, such as deciding guideline questions,  
36  
37  
38 433 evidence searching, and assembly of the guideline group[75]. How CPGs may impact  
39  
40 434 more vulnerable members of society should be reflected-upon during guideline  
41  
42 435 development[76], and implementation[77].

43  
44  
45 436 *Implications for clinicians, UK and international policymakers, and patients*

46  
47 437 Clinicians should be made aware that gender minority/trans health CPGs outside of HIV-  
48  
49 438 related topics are linked to a weak evidence base, with variations in methodological  
50  
51 439 rigour and lack of stakeholder involvement. While patient care plans ought to take into  
52  
53  
54 440 account the individual needs of each gender minority/trans person, a gap appears to exist

1  
2  
3 441 between clinical practice and research in this field[78]. Clinicians should proceed with  
4  
5 442 caution, explain uncertainties to patients and recruit to research.  
6

7  
8 443 Policymakers ought to invest in both primary research and high-quality systematic  
9  
10 444 reviews in areas relevant for CPG and service development. Organisations producing  
11  
12 445 guidelines and aspiring to higher-level quality could use more robust methods, handling  
13  
14 446 of competing interests[79,80], and quality assessment. CPG developers should label key  
15  
16 447 recommendations clearly. Although editorial independence was lowest priority for  
17  
18 448 stakeholders, independent external review is important to avoid biases and bad practices,  
19  
20 449 examine use of resources, resist commercial interests, and gain widespread credibility  
21  
22 450 outside the field.  
23  
24  
25

26 451 The UK is fortunate in being familiar with developing priority-setting partnerships (e.g.  
27  
28 452 James Lind Initiative[81]) and generating suites of clinical questions that might cover all  
29  
30 453 steps in patient pathways (e.g. in partnership with Cochrane Collaboration[82]). These  
31  
32 454 could underpin multidisciplinary and funded research priorities whose results feed into  
33  
34 455 future better evidence-based CPGs. Implications for UK education and curricular content  
35  
36 456 (e.g. new gender identity healthcare credentials[83]), should be carefully scrutinised.  
37  
38  
39

40 457 Internationally, CPG development and implementation will vary depending on local  
41  
42 458 country contexts and available resources. Those countries with quality assurance agencies  
43  
44 459 might use them for external assurance. Countries might reconsider the wisdom of  
45  
46 460 adapting low-quality ‘off the shelf’ international CPGs without due assessment of the  
47  
48 461 evidence for recommendations (e.g. using the GRADE Adolopment framework[84]).  
49  
50  
51 462 WHO demonstrates how CPGs can achieve high quality.  
52  
53  
54  
55  
56  
57  
58  
59  
60

1  
2  
3 463 Patients should be positively encouraged to engage with CPG development as  
4  
5 464 stakeholders. The lack of patient-facing material should be addressed, especially as  
6  
7 465 medical and non-medical online material contains jargon, is unreliable and potentially  
8  
9 466 misleading[85]. Future CPGs should be populated with patient-facing decision aids (e.g.  
10  
11 467 Fact Boxes[86] and icon arrays[87]) that explain sizes of benefits and harms to support  
12  
13 468 informed patient choice. Patients and carers will benefit from a more focused approach to  
14  
15 469 throughout-life healthcare. As the figures for gender minority/trans patients increase  
16  
17 470 within the NHS and internationally, so does the need for consistent guidance to clinicians  
18  
19 471 across specialisms on specific risks to, and means of treating, this population. Current  
20  
21 472 patients should be welcomed to contribute, where they are comfortable, to any research  
22  
23 473 being undertaken by their clinicians, in order to improve data and future practice for  
24  
25 474 gender minority/trans health.

#### 30 475 *Unanswered questions and future research*

31  
32 476 This study should be replicated as new iterations of international CPGs become available.  
33  
34 477 It can be applied to national guidelines and countries should perform their own  
35  
36 478 stakeholder prioritisation. When ‘best available evidence’ is poor, quality improvement  
37  
38 479 can be driven both from inside and outside the field. International guideline developers  
39  
40 480 require more primary research for this population, and impetus from clinicians and  
41  
42 481 scientists to build a better evidence base using robust data from randomised controlled  
43  
44 482 trials and long-term observational cohort studies, especially regarding chronic diseases,  
45  
46 483 health behaviours, substance use, screening and how interventions (e.g. hormones) might  
47  
48 484 impact on long-term health (e.g. risk of cardiovascular and thromboembolic disease).

1  
2  
3 485 Mortality and QoL data are required to address questions of clinical and cost-  
4  
5 486 effectiveness.

6  
7  
8 487 *Conclusion*

9  
10 488 Gender minority/trans health in current international CPGs seems limited to a focus on  
11  
12 489 HIV or transition-related interventions. WPATH SOCv7[30] is due for updating and this  
13  
14 490 study should be used positively to accelerate improvement. Future guideline developers  
15  
16 491 might better address the holistic healthcare needs of gender minority/trans people by  
17  
18 492 enhancing the evidence-base, upgrading the quality of CPGs and increasing the breadth  
19  
20 493 of health topics wherein this population is considered.  
21  
22  
23

24 494

25  
26 495 **Compliance with Ethical Standards**

27  
28 496 Contributorship statement: The authors were involved as follows: SB, IA, CM  
29  
30 497 conception. All authors (SD, DC, IA, MJ, SB, CM) were involved in design, execution,  
31  
32 498 analysis, drafting manuscript and critical discussion; all were responsible for revision and  
33  
34 499 final approval of the manuscript. All authors had full access to all the data (including  
35  
36 500 statistical reports and tables) in the study and can take responsibility for the integrity of  
37  
38 501 the data and the accuracy of the data analysis. CM acts as guarantor.

39  
40 502 Competing interests statement: The authors had no financial support for this work. There  
41  
42 503 were no financial relationships with any organisations that might have an interest in the  
43  
44 504 submitted work in the previous 3 years and there were no other relationships or activities  
45  
46 505 that could appear to have influenced the submitted work. All authors declare they have no  
47  
48 506 conflict of interests. SB, SD & DC's declarations can be found at  
49  
50  
51 507 <http://www.whopaysthisdoctor.org>  
52  
53  
54  
55  
56  
57  
58  
59  
60



1  
2  
3 508 Funding statement: This research received no specific grant from any funding agency in  
4  
5 509 the public, commercial or not-for-profit sectors.

6  
7  
8 510 Data sharing statement: Additional data are available upon request

9  
10 511 Ethical approval and informed consent: Not applicable. The article is a systematic review.

11  
12 512 Dissemination plan: Not applicable, publication will be shared with stakeholders.

13  
14 513 Transparency declaration: CM affirms that the manuscript is an honest, accurate, and  
15  
16 514 transparent account of the study being reported; that no important aspects of the study  
17  
18 515 have been omitted; and that any discrepancies from the study as originally planned and  
19  
20 516 registered have been explained.

21  
22  
23  
24 517

## 25 26 518 **Licence Statement**

27  
28  
29 519 \* I, the Submitting Author has the right to grant and does grant on behalf of all authors of the  
30 520 Work (as defined in the below author licence), an exclusive licence and/or a non-exclusive  
31 521 licence for contributions from authors who are: i) UK Crown employees; ii) where BMJ has  
32 522 agreed a CC-BY licence shall apply, and/or iii) in accordance with the terms applicable for  
33 523 US Federal Government officers or employees acting as part of their official duties; on a  
34 524 worldwide, perpetual, irrevocable, royalty-free basis to BMJ Publishing Group Ltd ("BMJ") its  
35 525 licensees and where the relevant Journal is co-owned by BMJ to the co-owners of the  
36 526 Journal, to publish the Work in BMJ Open and any other BMJ products and to exploit all  
37 527 rights, as set out in our [licence](#).

38 528  
39 529 The Submitting Author accepts and understands that any supply made under these terms is  
40 530 made by BMJ to the Submitting Author unless you are acting as an employee on behalf of  
41 531 your employer or a postgraduate student of an affiliated institution which is paying any  
42 532 applicable article publishing charge ("APC") for Open Access articles. Where the Submitting  
43 533 Author wishes to make the Work available on an Open Access basis (and intends to pay the  
44 534 relevant APC), the terms of reuse of such Open Access shall be governed by a Creative  
45 535 Commons licence – details of these licences and which [Creative Commons](#) licence will apply  
46 536 to this Work are set out in our licence referred to above.

47 537

## 48 49 538 **References**

50  
51  
52 539 1 Institute of Medicine. *Clinical Practice Guidelines We Can Trust*. Washington,  
53  
54 540 D.C.: : The National Academies Press 2011. doi:10.17226/13058

- 1  
2  
3 541 2 Kredo T, Bernhardsson S, Machingaidze S, *et al.* Guide to clinical practice  
4  
5 542 guidelines: the current state of play. *Int J Qual Heal Care* 2016;**28**:122–8.  
6  
7 543 doi:10.1093/intqhc/mzv115  
8  
9  
10 544 3 Woolf SH, Grol R, Hutchinson A, *et al.* Clinical guidelines: Potential benefits,  
11  
12 545 limitations, and harms of clinical guidelines. *BMJ* 1999;**318**:527–30.  
13  
14 546 doi:10.1136/bmj.318.7182.527  
15  
16  
17 547 4 Guyatt GH, Oxman AD, Kunz R, *et al.* What is “quality of evidence” and why is it  
18  
19 548 important to clinicians? *BMJ* 2008;**336**:995–8. doi:10.1136/bmj.39490.551019.BE  
20  
21 549 5 Guyatt GH, Oxman AD, Vist GE, *et al.* GRADE: an emerging consensus on rating  
22  
23 550 quality of evidence and strength of recommendations. *BMJ* 2008;**336**:924–6.  
24  
25 551 doi:10.1136/bmj.39489.470347.AD  
26  
27  
28 552 6 Guyatt G, Oxman AD, Akl EA, *et al.* GRADE guidelines: 1. Introduction—  
29  
30 553 GRADE evidence profiles and summary of findings tables. *J Clin Epidemiol*  
31  
32 554 2011;**64**:383–94. doi:10.1016/j.jclinepi.2010.04.026  
33  
34  
35 555 7 Siemieniuk R, Guyatt G. What is GRADE? *BMJ Best Pract.*  
36  
37 556 <https://bestpractice.bmj.com/info/toolkit/learn-ebm/what-is-grade/> (accessed 23  
38  
39 557 Nov 2020).  
40  
41  
42 558 8 GRADE Working Group. GRADE Publications.  
43  
44 559 2020.<https://www.gradeworkinggroup.org/> (accessed 15 Aug 2020).  
45  
46  
47 560 9 Siemieniuk R. *Rapid Recommendations: Improving the efficiency and*  
48  
49 561 *trustworthiness of systematic reviews and guidelines.*  
50  
51 562 2020.<http://hdl.handle.net/11375/25540>  
52  
53  
54 563 10 Brouwers MC, Kho ME, Browman GP, *et al.* AGREE II: advancing guideline

- 1  
2  
3 564 development, reporting and evaluation in health care. *Can Med Assoc J*  
4  
5 565 2010;**182**:E839–42. doi:10.1503/cmaj.090449  
6  
7  
8 566 11 AGREE Next Steps Consortium. The AGREE II Instrument [Electronic version].  
9  
10 567 2017.<http://www.agreetrust.org> (accessed 14 Jul 2020).  
11  
12 568 12 Development and validation of an international appraisal instrument for assessing  
13  
14 569 the quality of clinical practice guidelines: the AGREE project. *Qual Saf Heal Care*  
15  
16 570 2003;**12**:18–23. doi:10.1136/qhc.12.1.18  
17  
18  
19 571 13 Trevisiol C, Cinquini M, Fabricio ASC, *et al.* Insufficient uptake of systematic  
20  
21 572 search methods in oncological clinical practice guideline: a systematic review.  
22  
23 573 *BMC Med Res Methodol* 2019;**19**:180. doi:10.1186/s12874-019-0818-5  
24  
25  
26 574 14 Plöderl M, Hengartner MP. Guidelines for the pharmacological acute treatment of  
27  
28 575 major depression: conflicts with current evidence as demonstrated with the  
29  
30 576 German S3-guidelines. *BMC Psychiatry* 2019;**19**:265. doi:10.1186/s12888-019-  
31  
32 577 2230-4  
33  
34  
35 578 15 Maes-Carballo M, Mignini L, Martín-Díaz M, *et al.* Quality and reporting of  
36  
37 579 clinical guidelines for breast cancer treatment: A systematic review. *The Breast*  
38  
39 580 2020;**53**:201–11. doi:10.1016/j.breast.2020.07.011  
40  
41  
42 581 16 WHO. WHO/Europe brief – transgender health in the context of ICD-11.  
43  
44 582 <https://www.euro.who.int/en/health-topics/health-determinants/gender/gender->  
45  
46 583 [definitions/whoeurope-brief-transgender-health-in-the-context-of-icd-11](https://www.euro.who.int/en/health-topics/health-determinants/gender/gender-definitions/whoeurope-brief-transgender-health-in-the-context-of-icd-11) (accessed  
47  
48 584 16 Jul 2020).  
49  
50  
51 585 17 Butler G, Graaf N De, Wren B, *et al.* Assessment and support of children and  
52  
53 586 adolescents with gender dysphoria. *Arch Dis Child* 2018;**103**:631–6.  
54  
55  
56  
57  
58  
59  
60

- 1  
2  
3 587 doi:10.1136/archdischild-2018-314992  
4  
5 588 18 Kaltiala-Heino R, Bergman H, Työläjärvi M, *et al.* Gender dysphoria in  
6  
7 589 adolescence: current perspectives. *Adolesc Health Med Ther* 2018;**9**:31–41.  
8  
9 590 doi:10.2147/AHMT.S135432  
10  
11  
12 591 19 Freitas LD, Léda-Rêgo G, Bezerra-Filho S, *et al.* Psychiatric disorders in  
13  
14  
15 592 individuals diagnosed with gender dysphoria: A systematic review. *Psychiatry*  
16  
17 593 *Clin Neurosci* 2020;**74**:99–104. doi:10.1111/pcn.12947  
18  
19  
20 594 20 Connolly D, Davies E, Lynskey M, *et al.* Comparing intentions to reduce  
21  
22 595 substance use and willingness to seek help among transgender and cisgender  
23  
24 596 participants from the Global Drug Survey. *J Subst Abuse Treat* 2020;**112**:86–91.  
25  
26 597 doi:10.1016/j.jsat.2020.03.001  
27  
28  
29 598 21 Clements-Nolle K, Marx R, Katz M. Attempted Suicide Among Transgender  
30  
31 599 Persons. *J Homosex* 2006;**51**:53–69. doi:10.1300/J082v51n03\_04  
32  
33  
34 600 22 Catelan RF, Costa AB, de Macedo Lisboa CS. Psychological Interventions for  
35  
36 601 Transgender Persons: A Scoping Review. *Int J Sex Heal* 2017;**29**:325–37.  
37  
38 602 doi:10.1080/19317611.2017.1360432  
39  
40  
41 603 23 Glynn TR, van den Berg JJ. A Systematic Review of Interventions to Reduce  
42  
43 604 Problematic Substance Use Among Transgender Individuals: A Call to Action.  
44  
45 605 *Transgender Heal* 2017;**2**:45–59. doi:10.1089/trgh.2016.0037  
46  
47  
48 606 24 Poteat T, Reisner SL, Radix A. HIV epidemics among transgender women. *Curr*  
49  
50 607 *Opin HIV AIDS* 2014;**9**:168–73. doi:10.1097/COH.0000000000000030  
51  
52  
53 608 25 Winter S, Diamond M, Green J, *et al.* Transgender people: health at the margins of  
54  
55 609 society. *Lancet* 2016;**388**:390–400. doi:10.1016/S0140-6736(16)00683-8  
56  
57  
58  
59  
60

- 1  
2  
3 610 26 James SE, Herman JL, Rankin S, *et al.* *The report of the US Transgender Survey*  
4  
5 611 2015. Washington, D.C.: : National Center for Healthcare Equality 2016.  
6  
7 612 <https://www.transequality.org/sites/default/files/docs/USTS-Full-Report->  
8  
9 613 FINAL.PDF
- 10  
11  
12 614 27 Bockting WO, Miner MH, Romine RES, *et al.* Stigma, Mental Health, and  
13  
14 615 Resilience in an Online Sample of the US Transgender Population. *Am J Public*  
15  
16 616 *Health* 2013;**103**:943–51. doi:10.2105/AJPH.2013.301241
- 17  
18  
19 617 28 OHCHR. Discrimination and violence against individuals based on their sexual  
20  
21 618 orientation and gender identity. 2015.  
22  
23 619 [https://ap.ohchr.org/documents/dpage\\_e.aspx?si=A/HRC/29/23](https://ap.ohchr.org/documents/dpage_e.aspx?si=A/HRC/29/23)
- 24  
25  
26 620 29 Reisner SL, Poteat T, Keatley J, *et al.* Global health burden and needs of  
27  
28 621 transgender populations: a review. *Lancet* 2016;**388**:412–36. doi:10.1016/S0140-  
29  
30 622 6736(16)00684-X
- 31  
32  
33 623 30 Coleman E, Bockting W, Botzer M, *et al.* Standards of Care for the Health of  
34  
35 624 Transsexual, Transgender, and Gender-Nonconforming People, Version 7. *Int J*  
36  
37 625 *Transgenderism* 2012;**13**:165–232. doi:10.1080/15532739.2011.700873
- 38  
39  
40 626 31 Wylie K, Knudson G, Khan SI, *et al.* Serving transgender people: clinical care  
41  
42 627 considerations and service delivery models in transgender health. *Lancet*  
43  
44 628 2016;**388**:401–11. doi:10.1016/S0140-6736(16)00682-6
- 45  
46  
47 629 32 Dahl M, Feldman JL, Goldberg J, *et al.* Endocrine Therapy for Transgender Adults  
48  
49 630 in British Columbia: Suggested Guidelines Physical Aspects of Transgender  
50  
51 631 Endocrine Therapy. 2015.
- 52  
53  
54 632 33 Oliphant J, Veale J, Macdonald J, *et al.* Guidelines for Gender Affirming  
55  
56  
57  
58  
59  
60

- 1  
2  
3 633 Healthcare for Gender Diverse and Transgender Children, Young People and  
4  
5 634 Adults in Aotearoa, New Zealand. *N Z Med J* 2018;**131**:86–  
6  
7 635 96.<http://www.ncbi.nlm.nih.gov/pubmed/30543615>  
8  
9  
10 636 34 Psychological Society of South Africa. *Practice Guidelines For Psychology*  
11  
12 637 *Professionals Working With Sexually And Gender-Diverse People*. Johannesburg: :  
13  
14 638 Psychological Society of South Africa 2017. [https://www.psyssa.com/wp-](https://www.psyssa.com/wp-content/uploads/2018/04/PsySSA-Diversity-Competence-Practice-Guidelines-PRINT-singlesided.pdf)  
15  
16 639 [content/uploads/2018/04/PsySSA-Diversity-Competence-Practice-Guidelines-](https://www.psyssa.com/wp-content/uploads/2018/04/PsySSA-Diversity-Competence-Practice-Guidelines-PRINT-singlesided.pdf)  
17  
18 640 [PRINT-singlesided.pdf](https://www.psyssa.com/wp-content/uploads/2018/04/PsySSA-Diversity-Competence-Practice-Guidelines-PRINT-singlesided.pdf)  
19  
20  
21 641 35 UCSF Transgender Care. *Guidelines for the Primary and Gender-Affirming Care*  
22  
23 642 *of Transgender and Gender Nonbinary People*. 2nd ed. San Francisco: :  
24  
25 643 Department of Family and Community Medicine University of California San  
26  
27 644 Francisco 2016. <https://transcare.ucsf.edu/guidelines>  
28  
29  
30 645 36 Deutsch M, Radix A, Reisner S. What’s in a Guideline? Developing Collaborative  
31  
32 646 and Sound Research Designs that Substantiate Best Practice Recommendations for  
33  
34 647 Transgender Health Care. *AMA J Ethics* 2016;**18**:1098–106.  
35  
36 648 [doi:10.1001/journalofethics.2016.18.11.stas1-1611](https://doi.org/10.1001/journalofethics.2016.18.11.stas1-1611)  
37  
38 649 37 Gender Identity Research and Education Society. What We Do.  
39  
40 650 <https://www.gires.org.uk/what-we-do/improving-medical-care/> (accessed 18 Nov  
41  
42 651 2020).  
43  
44  
45 652 38 Ahmad S, Barrett J, Beaini AY, *et al*. Gender dysphoria services: a guide for  
46  
47 653 general practitioners and other healthcare staff. *Sex Relatsh Ther* 2013;**28**:172–85.  
48  
49 654 [doi:10.1080/14681994.2013.808884](https://doi.org/10.1080/14681994.2013.808884)  
50  
51  
52 655 39 Wylie K, Barrett J, Besser M, *et al*. Good Practice Guidelines for the Assessment  
53  
54  
55  
56  
57  
58  
59  
60

- 1  
2  
3 656 and Treatment of Adults with Gender Dysphoria. *Sex Relatsh Ther* 2014;**29**:154–  
4  
5 657 214. doi:10.1080/14681994.2014.883353  
6  
7  
8 658 40 RCGP. The role of the GP in caring for gender-questioning and transgender  
9  
10 659 patients. RCGP Position Statement. 2019. <https://www.rcgp.org.uk/->  
11  
12 660 [/media/Files/Policy/A-Z-policy/2019/RCGP-position-statement-providing-care-](https://www.rcgp.org.uk/-/media/Files/Policy/A-Z-policy/2019/RCGP-position-statement-providing-care-for-gender-transgender-patients-june-2019.ashx?la=en)  
13  
14 661 [for-gender-transgender-patients-june-2019.ashx?la=en](https://www.rcgp.org.uk/-/media/Files/Policy/A-Z-policy/2019/RCGP-position-statement-providing-care-for-gender-transgender-patients-june-2019.ashx?la=en) (accessed 23 Nov 2020).  
15  
16  
17 662 41 Hoffmann-Eßer W, Siering U, Neugebauer EAM, *et al*. Guideline appraisal with  
18  
19 663 AGREE II: Systematic review of the current evidence on how users handle the 2  
20  
21 664 overall assessments. *PLoS One* 2017;**12**:e0174831.  
22  
23 665 doi:10.1371/journal.pone.0174831  
24  
25  
26 666 42 Siering U, Eikermann M, Hausner E, *et al*. Appraisal Tools for Clinical Practice  
27  
28 667 Guidelines: A Systematic Review. *PLoS One* 2013;**8**:e82915.  
29  
30 668 doi:10.1371/journal.pone.0082915  
31  
32  
33 669 43 McGowan J, Sampson M, Salzwedel DM, *et al*. PRESS Peer Review of Electronic  
34  
35 670 Search Strategies: 2015 Guideline Statement. *J Clin Epidemiol* 2016;**75**:40–6.  
36  
37 671 doi:10.1016/j.jclinepi.2016.01.021  
38  
39  
40 672 44 Scottish Intercollegiate Guidelines Network. What Are Guidelines? Sign.  
41  
42 673 <https://www.sign.ac.uk/what-are-guidelines> (accessed 16 Jul 2020).  
43  
44  
45 674 45 National Institute for Health and Care Excellence. How NICE clinical guidelines  
46  
47 675 are developed: an overview for stakeholders, the public and the NHS. NICE. 2012.  
48  
49 676 46 Institute of Medicine. *Guidelines for Clinical Practice: From Development to Use*.  
50  
51 677 Washington, D.C.: : The National Academies Press 1992. doi:10.17226/1863  
52  
53  
54 678 47 Moher D, Liberati A, Tetzlaff J, *et al*. Preferred Reporting Items for Systematic  
55  
56  
57  
58  
59

- 1  
2  
3 679       Reviews and Meta-Analyses: The PRISMA Statement. *PLoS Med*  
4  
5 680       2009;**6**:e1000097. doi:10.1371/journal.pmed.1000097  
6  
7  
8 681    48    WHO. *Prevention and treatment of HIV and other sexually transmitted infections*  
9  
10 682       *among men who have sex with men and transgender people: recommendations for*  
11  
12 683       *a public health approach*. Geneva: : World Health Organization 2011.  
13  
14 684       [https://www.who.int/hiv/pub/guidelines/msm\\_guidelines2011/en/](https://www.who.int/hiv/pub/guidelines/msm_guidelines2011/en/)  
15  
16  
17 685    49    WHO. *Guidance on oral pre-exposure prophylaxis (PrEP) for serodiscordant*  
18  
19 686       *couples, men and transgender women who have sex with men at high risk of HIV:*  
20  
21 687       *recommendations for use in the context of demonstration projects*. Geneva: :  
22  
23 688       World Health Organization 2012. [https://www.who.int/hiv/pub/guidance\\_prep/en/](https://www.who.int/hiv/pub/guidance_prep/en/)  
24  
25  
26 689    50    WHO. *Consolidated guidelines on HIV prevention, diagnosis, treatment and care*  
27  
28 690       *for key populations, 2016 update*. 2016.  
29  
30 691       <http://www.who.int/hiv/pub/guidelines/keypopulations/>  
31  
32  
33 692    51    Davies S, Papp VG, Antoni C. Voice and Communication Change for Gender  
34  
35 693       Nonconforming Individuals: Giving Voice to the Person Inside. *Int J*  
36  
37 694       *Transgenderism* 2015;**16**:117–59. doi:10.1080/15532739.2015.1075931  
38  
39  
40 695    52    Gilligan T, Coyle N, Frankel RM, *et al*. Patient-Clinician Communication:  
41  
42 696       American Society of Clinical Oncology Consensus Guideline. *J Clin Oncol*  
43  
44 697       2017;**35**:3618–32. doi:10.1200/JCO.2017.75.2311  
45  
46  
47 698    53    Hembree WC, Cohen-Kettenis PT, Gooren L, *et al*. Endocrine treatment of gender-  
48  
49 699       dysphoric/ gender-incongruent persons: An endocrine society\*clinical practice  
50  
51 700       guideline. *J Clin Endocrinol Metab* 2017;**102**:3869–903. doi:10.1210/jc.2017-  
52  
53 701       01658  
54  
55  
56  
57  
58  
59  
60



- 1  
2  
3 702 54 IAPAC Guidelines for Optimizing the HIV Care Continuum for Adults and  
4  
5 703 Adolescents. *J Int Assoc Provid AIDS Care* 2015;**14**:S3–34.  
6  
7 704 doi:10.1177/2325957415613442  
8  
9  
10 705 55 T’Sjoen G, Arcelus J, De Vries ALC, *et al.* European Society for Sexual Medicine  
11  
12 706 Position Statement “Assessment and Hormonal Management in Adolescent and  
13  
14 707 Adult Trans People, With Attention for Sexual Function and Satisfaction”. *J Sex*  
15  
16 708 *Med* 2020;**17**:570–84. doi:10.1016/j.jsxm.2020.01.012  
17  
18  
19 709 56 Ralph D, Gonzalez-Cadavid N, Mirone V, *et al.* Trauma, Gender Reassignment,  
20  
21 710 and Penile Augmentation. *J Sex Med* 2010;**7**:1657–67. doi:10.1111/j.1743-  
22  
23 711 6109.2010.01781.x  
24  
25  
26 712 57 Strang JF, Meagher H, Kenworthy L, *et al.* Initial Clinical Guidelines for Co-  
27  
28 713 Occurring Autism Spectrum Disorder and Gender Dysphoria or Incongruence in  
29  
30 714 Adolescents. *J Clin Child Adolesc Psychol* 2018;**47**:105–15.  
31  
32 715 doi:10.1080/15374416.2016.1228462  
33  
34  
35 716 58 ECDC. *European Centre for Disease Prevention and Control. Public health*  
36  
37 717 *guidance on HIV, hepatitis B and C testing in the EU/EEA: An integrated*  
38  
39 718 *approach*. Stockholm: 2018. doi:10.2900/79127  
40  
41  
42 719 59 Jungwirth, A; Diemer, T; Kopa, Z; Krausz, C; Minhas, S; Tournaye H. *EAU*  
43  
44 720 *Guidelines on Male Infertility*. European Association of Urology 2018.  
45  
46 721 <https://uroweb.org/guideline/male-infertility/>  
47  
48  
49 722 60 Thoreson N, Marks DH, Peebles JK, *et al.* Health Insurance Coverage of  
50  
51 723 Permanent Hair Removal in Transgender and Gender-Minority Patients. *JAMA*  
52  
53 724 *Dermatology* 2020;**156**:561. doi:10.1001/jamadermatol.2020.0480  
54  
55  
56  
57  
58  
59  
60

- 1  
2  
3 725 61 Solotke MT, Liu P, Dhruva SS, *et al.* Medicare Prescription Drug Plan Coverage  
4  
5 726 of Hormone Therapies Used by Transgender Individuals. *LGBT Heal* 2020;**7**:137–  
6  
7 727 45. doi:10.1089/lgbt.2019.0306  
8  
9  
10 728 62 Fraser L, Knudson G. Past and Future Challenges Associated with Standards of  
11  
12 729 Care for Gender Transitioning Clients. *Psychiatr Clin North Am* 2017;**40**:15–27.  
13  
14 730 doi:10.1016/j.psc.2016.10.012  
15  
16  
17 731 63 Shuster S. Uncertain Expertise and the Limitations of Clinical Guidelines in  
18  
19 732 Transgender Healthcare. *J Health Soc Behav* 2016;**57**:319–32.  
20  
21 733 doi:10.1177/0022146516660343  
22  
23  
24 734 64 Velho I, Fighera TM, Ziegelmann PK, *et al.* Effects of testosterone therapy on  
25  
26 735 BMI, blood pressure, and laboratory profile of transgender men: a systematic  
27  
28 736 review. *Andrology* 2017;**5**:881–8. doi:10.1111/andr.12382  
29  
30  
31 737 65 Maraka S, Singh Ospina N, Rodriguez-Gutierrez R, *et al.* Sex Steroids and  
32  
33 738 Cardiovascular Outcomes in Transgender Individuals: A Systematic Review and  
34  
35 739 Meta-Analysis. *J Clin Endocrinol Metab* 2017;**102**:3914–23. doi:10.1210/jc.2017-  
36  
37 740 01643  
38  
39  
40 741 66 Connolly D, Hughes X, Berner A. Barriers and facilitators to cervical cancer  
41  
42 742 screening among transgender men and non-binary people with a cervix: A  
43  
44 743 systematic narrative review. *Prev Med (Baltim)* 2020;**135**:106071.  
45  
46 744 doi:10.1016/j.yjpm.2020.106071  
47  
48  
49 745 67 Lei X, Liu F, Luo S, *et al.* Evaluation of guidelines regarding surgical treatment of  
50  
51 746 breast cancer using the AGREE Instrument: A systematic review. *BMJ Open*  
52  
53 747 2017;**7**:1–11. doi:10.1136/bmjopen-2016-014883  
54  
55  
56  
57  
58  
59  
60

- 1  
2  
3 748 68 Bhatt M, Nahari A, Wang P-W, *et al.* The quality of clinical practice guidelines for  
4  
5 749 management of pediatric type 2 diabetes mellitus: a systematic review using the  
6  
7 750 AGREE II instrument. *Syst Rev* 2018;**7**:193. doi:10.1186/s13643-018-0843-1  
8  
9  
10 751 69 Bazzano AN, Green E, Madison A, *et al.* Assessment of the quality and content of  
11  
12 752 national and international guidelines on hypertensive disorders of pregnancy using  
13  
14 753 the AGREE II instrument. *BMJ Open* 2016;**6**:e009189. doi:10.1136/bmjopen-  
15  
16 754 2015-009189  
17  
18  
19 755 70 MacQueen G, Santaguida P, Keshavarz H, *et al.* Systematic Review of Clinical  
20  
21 756 Practice Guidelines for Failed Antidepressant Treatment Response in Major  
22  
23 757 Depressive Disorder, Dysthymia, and Subthreshold Depression in Adults. *Can J*  
24  
25 758 *Psychiatry* 2017;**62**:11–23. doi:10.1177/0706743716664885  
26  
27  
28 759 71 Alonso-Coello P, Irfan A, Sola I, *et al.* The quality of clinical practice guidelines  
29  
30 760 over the last two decades: a systematic review of guideline appraisal studies. *BMJ*  
31  
32 761 *Qual Saf* 2010;**19**:e58–e58. doi:10.1136/qshc.2010.042077  
33  
34  
35 762 72 Bewley S. What inhibits obstetricians implementing reliable guidelines? *BJOG An*  
36  
37 763 *Int J Obstet Gynaecol* 2020;**127**:798. doi:10.1111/1471-0528.16177  
38  
39  
40 764 73 Grilli R, Magrini N, Penna A, *et al.* Practice guidelines developed by specialty  
41  
42 765 societies: the need for a critical appraisal. *Lancet* 2000;**355**:103–6.  
43  
44 766 doi:10.1016/S0140-6736(99)02171-6  
45  
46  
47 767 74 Welch VA, Akl EA, Guyatt G, *et al.* GRADE equity guidelines 1: considering  
48  
49 768 health equity in GRADE guideline development: introduction and rationale. *J Clin*  
50  
51 769 *Epidemiol* 2017;**90**:59–67. doi:10.1016/j.jclinepi.2017.01.014  
52  
53  
54 770 75 Akl EA, Welch V, Pottie K, *et al.* GRADE equity guidelines 2: considering health  
55  
56  
57  
58  
59

- 1  
2  
3 771 equity in GRADE guideline development: equity extension of the guideline  
4  
5 772 development checklist. *J Clin Epidemiol* 2017;**90**:68–75.  
6  
7  
8 773 doi:10.1016/j.jclinepi.2017.01.017  
9  
10 774 76 Welch VA, Akl EA, Pottie K, *et al.* GRADE equity guidelines 3: considering  
11  
12 775 health equity in GRADE guideline development: rating the certainty of  
13  
14 776 synthesized evidence. *J Clin Epidemiol* 2017;**90**:76–83.  
15  
16 777 doi:10.1016/j.jclinepi.2017.01.015  
17  
18  
19 778 77 Pottie K, Welch V, Morton R, *et al.* GRADE equity guidelines 4: considering  
20  
21 779 health equity in GRADE guideline development: evidence to decision process. *J*  
22  
23 780 *Clin Epidemiol* 2017;**90**:84–91. doi:10.1016/j.jclinepi.2017.08.001  
24  
25  
26 781 78 Haupt C, Henke M, Kutschmar A, *et al.* Antiandrogen or estradiol treatment or  
27  
28 782 both during hormone therapy in transitioning transgender women. *Cochrane*  
29  
30 783 *Database Syst Rev* Published Online First: 28 November 2020.  
31  
32 784 doi:10.1002/14651858.CD013138.pub2  
33  
34  
35 785 79 Ioannidis JPA. Professional Societies Should Abstain From Authorship of  
36  
37 786 Guidelines and Disease Definition Statements. *Circ Cardiovasc Qual Outcomes*  
38  
39 787 2018;**11**. doi:10.1161/CIRCOUTCOMES.118.004889  
40  
41  
42 788 80 Ioannidis JPA. Guidelines Do Not Entangle Practitioners With Unavoidable  
43  
44 789 Conflicts as Authors, and When There Is No Evidence, Just Say So. *Circ*  
45  
46 790 *Cardiovasc Qual Outcomes* 2018;**11**. doi:10.1161/CIRCOUTCOMES.118.005205  
47  
48  
49 791 81 James Lind Alliance. About Priority Setting Partnerships.  
50  
51 792 <http://www.jla.nihr.ac.uk/about-the-james-lind-alliance/about-psps.htm> (accessed 8  
52  
53 793 Jul 2020).

- 1  
2  
3 794 82 Thomas J, Kneale D, McKenzie J, *et al.* Chapter 2: Determining the scope of the  
4  
5 795 review and the questions it will address. In: Higgins J, Thomas J, Chandler J, *et al.*,  
6  
7 796 eds. *Cochrane Handbook for Systematic Reviews of Interventions*. Cochrane 2020.  
8  
9  
10 797 [www.training.cochrane.org/handbook](http://www.training.cochrane.org/handbook) (accessed 11 Nov 2020).  
11  
12 798 83 Royal College of Physicians. Gender Identity Healthcare Credentials (GIH). RCP  
13  
14 799 London. [https://www.rcplondon.ac.uk/education-practice/courses/gender-identity-](https://www.rcplondon.ac.uk/education-practice/courses/gender-identity-healthcare-credentials-gih)  
15  
16 800 [healthcare-credentials-gih](https://www.rcplondon.ac.uk/education-practice/courses/gender-identity-healthcare-credentials-gih) (accessed 8 Jul 2020).  
17  
18  
19 801 84 Schünemann HJ, Wiercioch W, Brozek J, *et al.* GRADE Evidence to Decision  
20  
21 802 (EtD) frameworks for adoption, adaptation, and de novo development of  
22  
23 803 trustworthy recommendations: GRADE-ADOLOPMENT. *J Clin Epidemiol*  
24  
25 804 2017;**81**:101–10. doi:10.1016/j.jclinepi.2016.09.009  
26  
27  
28 805 85 Dunford C, Gresty H, Takhar M, *et al.* Transgender and adolescence: Is online  
29  
30 806 information accurate or mis-leading? *Eur Urol Suppl* 2019;**18**:e1782.  
31  
32 807 doi:10.1016/S1569-9056(19)31291-6  
33  
34  
35 808 86 Harding Center for Risk Literacy. Fact boxes.  
36  
37 809 <https://www.hardingcenter.de/en/fact-boxes> (accessed 8 Jul 2020).  
38  
39  
40 810 87 Winton Centre for Risk and Evidence Communication.  
41  
42 811 <https://wintoncentre.maths.cam.ac.uk/> (accessed 8 Jul 2020).  
43  
44  
45 812

46  
47 813 **Legend/Key for Figure**

48  
49 814 Figure 1. PRISMA flow diagram

50  
51 815 **Key:** CPG, clinical practice guideline; PRISMA, Preferred Reporting Items for Systematic Reviews and Meta-Analyses  
52  
53  
54  
55  
56  
57  
58  
59  
60

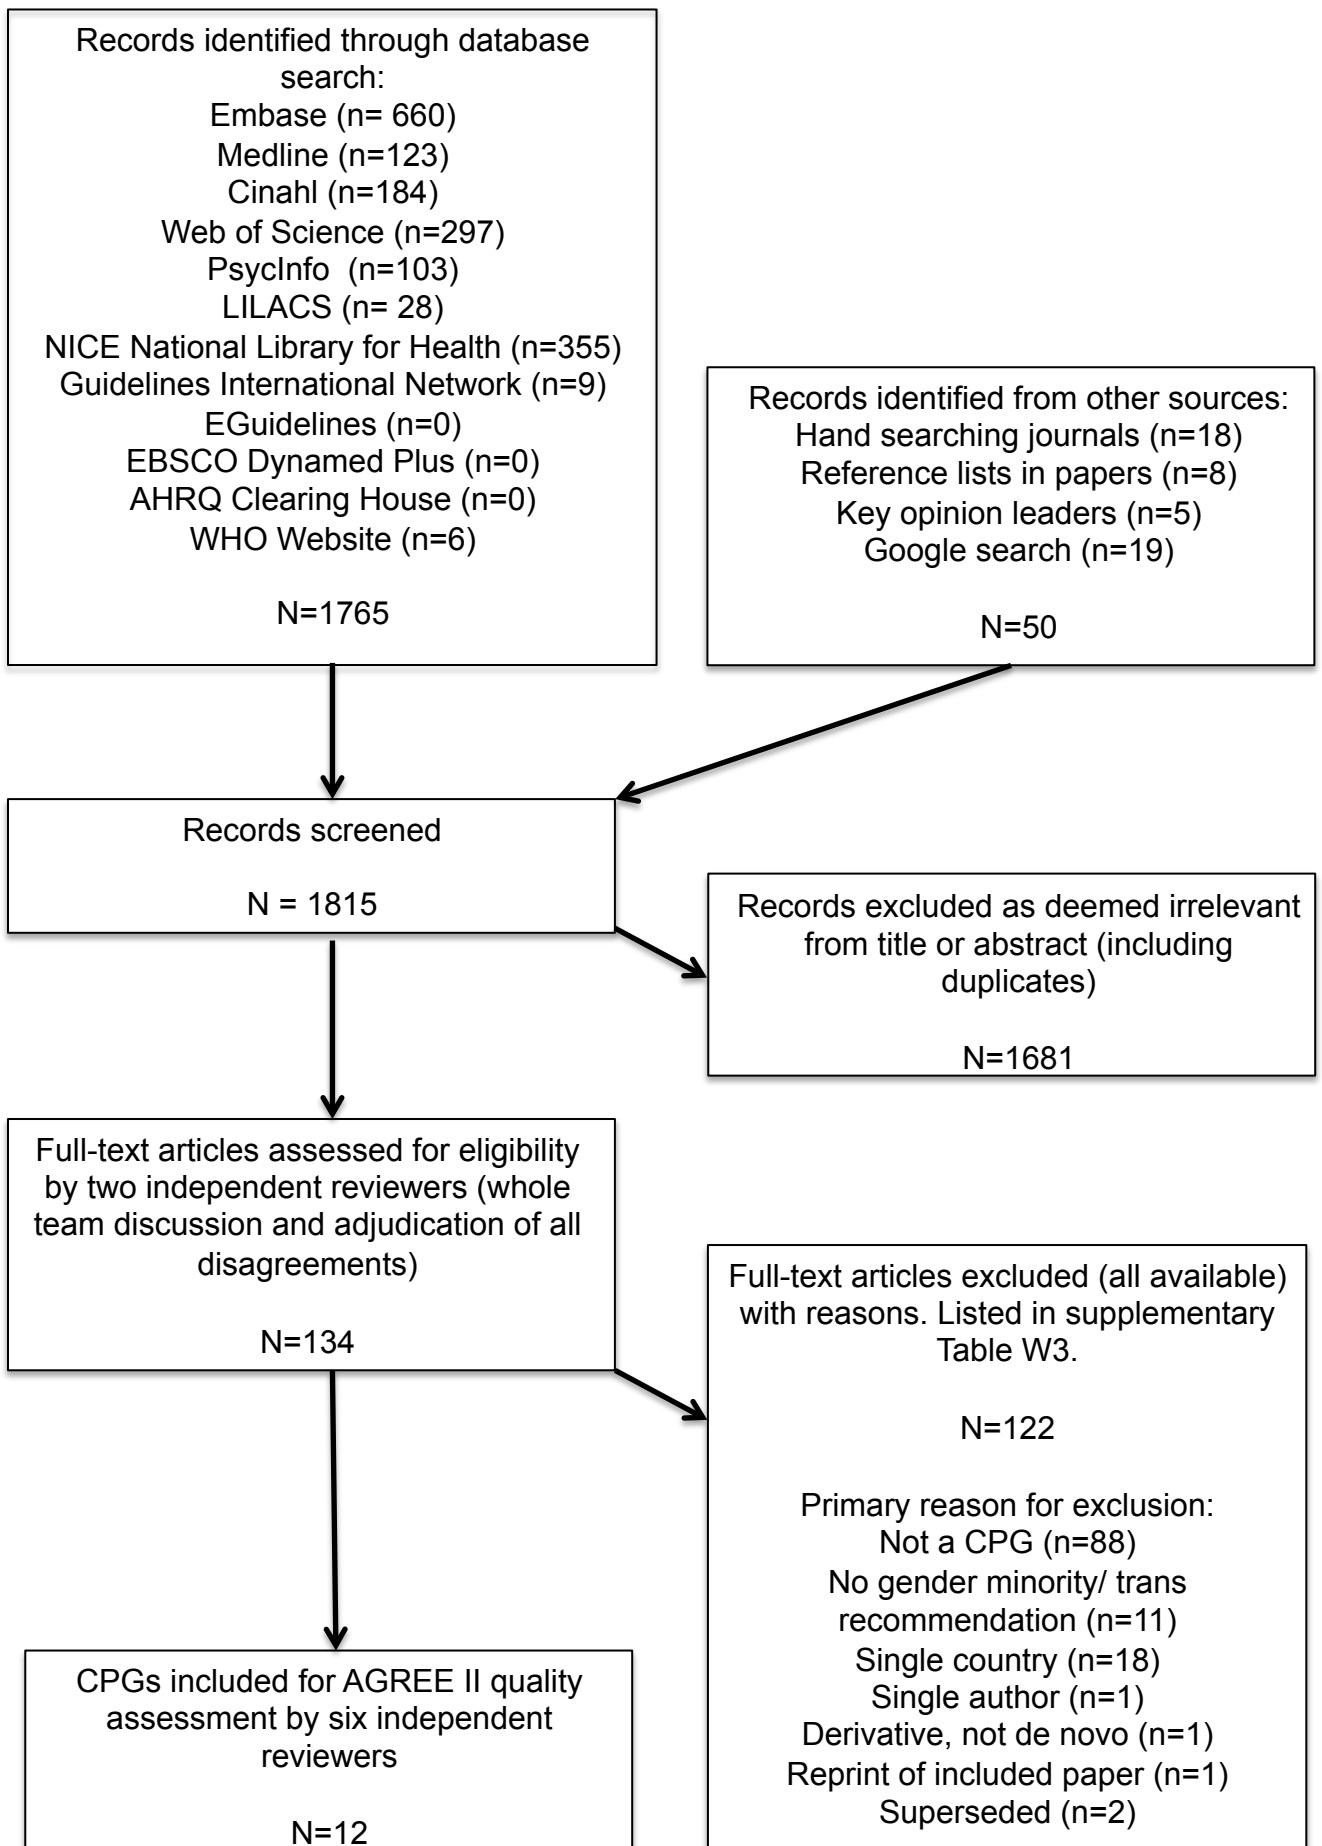

1  
2  
3 **International Clinical Practice Guidelines for Gender Minority/Trans People: Systematic Review and Quality Assessment**  
4  
5  
6  
7

8 **Supplementary/ Web/ Appendices**  
9

10 W1. Search terms used and search strategy for at least one database  
11

12 W2. Stakeholder and review team priority scoring exercise  
13

14 W3. Full text excluded studies with reasons for exclusion  
15

16  
17 W4. Extracted sentences relating to mortality or quality of life with associated references from Clinical Practice Guidelines  
18

19 W5. Extracted key recommendations from Clinical Practice Guidelines  
20  
21  
22  
23  
24  
25  
26  
27  
28  
29  
30  
31  
32  
33  
34  
35  
36  
37  
38  
39  
40  
41  
42  
43  
44  
45  
46  
47

## W1: Literature searching – Databases searched and search terms used

### Embase <1974 to 2019 July 29>

- 1 transgender.mp. or transgender/ (7297)
- 2 transsexual.mp. (2070)
- 3 gender identity/ or gender non-conforming.mp. (15929)
- 4 non-binary.mp. (219)
- 5 gender minority.mp. or "sexual and gender minority"/ (1582)
- 6 transman.mp. (20)
- 7 transwoman.mp. (25)
- 8 gender dysphoria.mp. or gender dysphoria/ (1887)
- 9 gender diversity.mp. (257)
- 10 1 or 2 or 3 or 4 or 5 or 6 or 7 or 8 or 9 (24836)
- 11 practice guideline/ or clinical guideline.mp. (387400)
- 12 10 and 11 (511)
- 13 limit 12 to yr="2008 - 2020" (460)

### Ovid MEDLINE(R) ALL <1946 to July 29, 2019>

- 1 gender diversity.mp. (225)
- 2 gender dysphoria.mp. or Transsexualism/ or Gender Dysphoria/ or Gender Identity/ (20817)
- 3 gender minority.mp. or "Sexual and Gender Minorities"/ (2406)
- 4 Transgender Persons/ or gender non-conforming.mp. (2429)
- 5 non-binary.mp. (164)
- 6 transgender.mp. (5364)
- 7 transman.mp. (8)
- 8 transwoman.mp. (13)
- 9 Transsexualism/ or transsexual.mp. (3855)
- 10 1 or 2 or 3 or 4 or 5 or 6 or 7 or 8 or 9 (26619)
- 11 Practice Guidelines as Topic/ or clinical guideline.mp. (112006)
- 12 10 and 11 (103)

### Web of Science

Search terms: (TOPIC: (((((transgender OR gender dysphoria) OR transsexual) OR gender identity) OR transman) OR transwomen)  
AND TOPIC: (clinical guideline OR practice guideline)) [271 results]

(TOPIC: (gender incongruence) AND TOPIC: (clinical guideline OR practice guideline))

### NICE Evidence



1  
2  
3  
4  
5  
6  
7  
8  
9  
10  
11  
12  
13  
14  
15  
16  
17  
18  
19  
20  
21  
22  
23  
24  
25  
26  
27  
28  
29  
30  
31  
32  
33  
34  
35  
36  
37  
38  
39  
40  
41  
42  
43  
44  
45  
46  
47

Search terms: Transgender, gender dysphoria

**CINAHL**

(transgender or transsexual or transsexual or gender variant or gender non-conforming or transmen or transwomen or gender dysphoria or gender identity) AND (clinical guideline or practice guideline)

**PSYCInfo**

(transgender or transsexual or transsexual or gender variant or gender non-conforming or transmen or transwomen or gender dysphoria or gender identity) AND (clinical guideline or practice guideline)

**AHRQ National Guidelines Clearing House**

Search terms: trans, gender identity. Was stopped in 2018 – no update searches available

**eGuidelines**

Search terms: trans, gender identity

**Guidelines International Network**

Search terms: Transgender, gender dysphoria, gender identity

**WHO website** – not searchable on so used Google instead

**Google Search terms:** WHO transgender guidelines - First 100 hits examined

Update: WHO transgender guidelines 2020

**LILACS**

Search term: gender dysphoria

**W2: Stakeholder prioritisation exercise and comparison with research team**

| Domains                  | Stakeholders (n=19) # |          |       |       |         |               | Reviewers (n=6) |    |       |     |    |          |
|--------------------------|-----------------------|----------|-------|-------|---------|---------------|-----------------|----|-------|-----|----|----------|
|                          | 1 highest             | 2        | 3     | 4     | 5       | 6 lowest      | 1 highest       | 2  | 3     | 4   | 5  | 6 lowest |
| Scope and purpose        | ***                   | ***** *  | *     | **    | ***** * |               | *               | *  | ***** | **  |    | *        |
| Stakeholder Involvement  | ***** ****            | *        | ***   | **    | **      | *             |                 |    | *     | *   | ** | *        |
| Rigour of development    | *                     | *        | ***** | ***** | ****    | **            | *****           | *  |       |     |    |          |
| Clarity and presentation | ***                   | ***      | ***** | ***   | *       | ***           |                 | *  |       | *** | *  |          |
| Applicability            | *                     | ***** ** | **    | ***** | ***     |               |                 | *  |       |     | *  | ***      |
| Editorial independence   | **                    | *        | **    | *     |         | ***** ***** * |                 | ** |       |     | ** | *        |

**Key:** # Numbers do not all add up to 19 as one stakeholder only gave first two preferences; \* stakeholder or reviewer preference vote. Green shows highest priority and red shows lowest priority

### W3: Excluded full studies with reasons for exclusion

| Full Citation (n=122)                                                                                                                                                                                                                                                                                           | Reason(s) for exclusion                                   |
|-----------------------------------------------------------------------------------------------------------------------------------------------------------------------------------------------------------------------------------------------------------------------------------------------------------------|-----------------------------------------------------------|
| Ackerley CG, Poteat T, Kelley CF. Human Immunodeficiency Virus in Transgender Persons. <i>Endocrinol Metab Clin North Am</i> 2019; <b>48</b> :453–64. doi:10.1016/j.ecl.2019.02.007                                                                                                                             | Not a CPG. Single country.                                |
| Adams N, Pearce R, Veale J, <i>et al.</i> Guidance and Ethical Considerations for Undertaking Transgender Health Research and Institutional Review Boards Adjudicating this Research. <i>Transgender Heal</i> 2017; <b>2</b> :165–75. doi:10.1089/trgh.2017.0012                                                | Not a CPG.                                                |
| ADFAM. Including diverse families: good practice guidelines. 2010. <a href="https://adfam.org.uk/files/docs/idf_toolkit.pdf">https://adfam.org.uk/files/docs/idf_toolkit.pdf</a>                                                                                                                                | No TG specific recommendation. Single country.            |
| Akl EA, Kennedy C, Konda K, <i>et al.</i> Using GRADE methodology for the development of public health guidelines for the prevention and treatment of HIV and other STIs among men who have sex with men and transgender people. <i>BMC Public Health</i> 2012; <b>12</b> :386. doi:10.1186/1471-2458-12-386    | Not a CPG.                                                |
| American College of Obstetricians and Gynecologists, Sokkary N, Gomez-Lobo V. Committee Opinion No. 685: Care for Transgender Adolescents. <i>Obstet Gynecol</i> 2017; <b>129</b> :e11–6. doi:10.1097/AOG.0000000000001861                                                                                      | Not a CPG. Single country.                                |
| American Psychological Assoc. Guidelines for psychological practice with transgender and gender nonconforming people. <i>Am Psychol</i> 2015; <b>70</b> :832–64. doi:10.1037/a0039906                                                                                                                           | Single country.                                           |
| American Psychological Association. Multicultural guidelines: An ecological approach to context, identity, and intersectionality, 2017. <i>Am Psychol Assoc</i> : 2017. <a href="http://www.apa.org/about/policy/multicultural-guidelines.pdf">http://www.apa.org/about/policy/multicultural-guidelines.pdf</a> | Single country.                                           |
| American Society for Reproductive Medicine, American College of Obstetricians and Gynecologists. Prepregnancy counseling: Committee Opinion No. 762. <i>Fertil Steril</i> 2019; <b>111</b> :32–42. doi:10.1016/j.fertnstert.2018.12.003                                                                         | Not a CPG. No TG specific recommendation. Single country. |
| Baggaley R, Armstrong A, Dodd Z, <i>et al.</i> Young key populations and HIV: A special emphasis and consideration in the new WHO Consolidated Guidelines on HIV Prevention, Diagnosis, Treatment and Care for Key Populations. <i>J Int AIDS Soc</i> 2015; <b>18</b> :85–8. doi:10.7448/IAS.18.2.19438         | Not a CPG.                                                |
| Barrett J. Gender Dysphoria in Adults. <i>BMJ Best Pract</i> . 2018. <a href="https://bestpractice.bmj.com/topics/en-gb/992">https://bestpractice.bmj.com/topics/en-gb/992</a>                                                                                                                                  | Not a CPG. Single author.                                 |
| Bekker L-G, Rebe K, Venter F, <i>et al.</i> Southern African guidelines on the safe use of pre-exposure prophylaxis in persons at risk of acquiring HIV-1 infection. <i>South Afr J HIV Med</i> 2016; <b>17</b> . doi:10.4102/sajhivmed.v17i1.455                                                               | Single country.                                           |
| Berli JU, Capitán L, Simon D, <i>et al.</i> Facial gender confirmation surgery—review of the literature and recommendations for Version 8 of the WPATH Standards of Care. <i>Int J Transgenderism</i> 2017; <b>18</b> :264–70. doi:10.1080/15532739.2017.1302862                                                | Not a CPG.                                                |
| Bhugra D, Gupta S, Schouler-Ocak M, <i>et al.</i> EPA Guidance Mental Health Care of Migrants. <i>Eur Psychiatry</i> 2014; <b>29</b> :107–15. doi:10.1016/j.eurpsy.2014.01.003                                                                                                                                  | Not a CPG. No TG specific recommendation.                 |
| Bonifacio JH, Maser C, Stadelman K, <i>et al.</i> Management of gender dysphoria in adolescents in primary care. <i>Can Med Assoc J</i> 2019; <b>191</b> :E69–75. doi:10.1503/cmaj.180672                                                                                                                       | Not a CPG. Single country.                                |
| Bonnington A, Dianat S, Kerns J, <i>et al.</i> Society of Family Planning clinical recommendations: Contraceptive counseling for transgender and gender diverse people who were female sex assigned at birth. <i>Contraception</i> Published Online First: 2020. doi:10.1016/j.contraception.2020.04.001        | Single country.                                           |
| Boroughs MS, Bedoya CA, O’Cleirigh C, <i>et al.</i> Toward Defining, Measuring, and Evaluating LGBT Cultural Competence for Psychologists. <i>Clin Psychol Sci Pract</i> 2015; <b>22</b> :151–71. doi:10.1111/cpsp.12098                                                                                        | Not a CPG. Single country.                                |
| Bourjeily G, Mehta S. Gender diversity in Obstetric Medicine. <i>Obstet Med</i> 2019; <b>12</b> :55–6. doi:10.1177/1753495X19851711                                                                                                                                                                             | Not a CPG.                                                |
| Brown B, Poteat T, Marg L, <i>et al.</i> Human Papillomavirus-Related Cancer Surveillance, Prevention, and Screening among Transgender Men and Women: Neglected Populations at High Risk. <i>LGBT Heal</i> 2017; <b>4</b> :315–9. doi:10.1089/lgbt.2016.0142                                                    | Not a CPG.                                                |
| Brown GR. Recommended revisions to the world professional association for transgender health’s standards of care section on medical care for incarcerated persons with gender identity disorder. <i>Int J Transgenderism</i> 2009; <b>11</b> :133–9. doi:10.1080/15532730903008073                              | Not a CPG. Single author.                                 |
| Bruessow DM, O’Connor LM, Eaman E, <i>et al.</i> Transgender Patients: Considerations for the Family Physician. <i>Fam Dr A J New York State Acad Fam Physicians</i> 2019; <b>7</b> :36–41.                                                                                                                     | Not a CPG. Single country.                                |

|    |                                                                                                                                                                                                                                                      |                                                  |
|----|------------------------------------------------------------------------------------------------------------------------------------------------------------------------------------------------------------------------------------------------------|--------------------------------------------------|
| 1  |                                                                                                                                                                                                                                                      |                                                  |
| 2  | Burns ZT, Bitterman DS, Liu KX, <i>et al.</i> Towards a standard of care in oncology for transgender patients. <i>Lancet Oncol</i> 2019; <b>20</b> :331–3.                                                                                           | Not a CPG. Single country.                       |
| 3  | doi:10.1016/S1470-2045(18)30942-2                                                                                                                                                                                                                    |                                                  |
| 4  | Byne W, Bradley SJ, Coleman E, <i>et al.</i> Treatment of gender identity disorder. <i>Am J Psychiatry</i> 2012; <b>169</b> :875–6. doi:10.1176/appi.ajp.2012.169.8.875                                                                              | Not a CPG.                                       |
| 5  | Canady V. APA practice guidelines for females focus on their strength, resilience. <i>Ment Heal Wkly</i> 2019; <b>29</b> :1–8. doi:10.1002/mhw                                                                                                       | Not a CPG. Single Country.<br>Single author.     |
| 6  |                                                                                                                                                                                                                                                      |                                                  |
| 7  | Capitán L, Gutiérrez Santamaría J, Simon D, <i>et al.</i> Facial Gender Confirmation Surgery. <i>Plast Reconstr Surg</i> 2020; <b>145</b> :818e–828e.                                                                                                | Not a CPG. Single Country.                       |
| 8  | doi:10.1097/PRS.00000000000006686                                                                                                                                                                                                                    |                                                  |
| 9  | Carswell JM, Roberts SA. Induction and Maintenance of Amenorrhea in Transmasculine and Nonbinary Adolescents. <i>Transgender Heal</i> 2017; <b>2</b> :195–                                                                                           | Not a CPG. Single country.                       |
| 10 | 201. doi:10.1089/trgh.2017.0021                                                                                                                                                                                                                      |                                                  |
| 11 | Chen D, Hidalgo MA, Leibowitz S, <i>et al.</i> Multidisciplinary Care for Gender-Diverse Youth: A Narrative Review and Unique Model of Gender-Affirming                                                                                              | Not a CPG.                                       |
| 12 | Care. <i>Transgender Heal</i> 2016; <b>1</b> :117–23. doi:10.1089/trgh.2016.0009                                                                                                                                                                     |                                                  |
| 13 | Church of England. <i>Valuing All God's Children: Challenging homophobic, biphobic and transphobic bullying.</i> 2nd ed. Church of England Education Office                                                                                          | Not a CPG.                                       |
| 14 | 2019. <a href="https://www.churchofengland.org/sites/default/files/2019-07/Valuing%20All%20God%27s%20Children%20July%202019_0.pdf">https://www.churchofengland.org/sites/default/files/2019-07/Valuing All God%27s Children July 2019_0.pdf</a>      |                                                  |
| 15 | Cohen J, Lo YR, Caceres CF, <i>et al.</i> WHO guidelines for HIV/STI prevention and care among MSM and transgender people: Implications for policy and                                                                                               | Not a CPG.                                       |
| 16 | practice. <i>Sex Transm Infect</i> 2013; <b>89</b> :536–8. doi:10.1136/sextrans-2013-051121                                                                                                                                                          |                                                  |
| 17 | Cohen-Kettenis PT, Klink D. Adolescents with gender dysphoria. <i>Best Pract Res Clin Endocrinol Metab</i> 2015; <b>29</b> :485–95.                                                                                                                  | Not a CPG.                                       |
| 18 | doi:10.1016/j.beem.2015.01.004                                                                                                                                                                                                                       |                                                  |
| 19 | Colebunders B, De Cuyper G, Monstrey S. New Criteria for Sex Reassignment Surgery: WPATH Standards of Care, Version 7, Revisited. <i>Int J</i>                                                                                                       | Not a CPG.                                       |
| 20 | <i>Transgenderism</i> 2015; <b>16</b> :222–33. doi:10.1080/15532739.2015.1081086                                                                                                                                                                     |                                                  |
| 21 | Coxon J, Seal L. Hormone management of trans men. <i>Trends Urol Men's Heal</i> 2018; <b>9</b> :8–12. doi:10.1002/tre.651                                                                                                                            | Not a CPG. Single country.                       |
| 22 | D'Angelo A, Panayotidis C, Amso N, <i>et al.</i> Recommendations for good practice in ultrasound: oocyte pick up†. <i>Hum Reprod Open</i> 2019; <b>2019</b> :1689–99.                                                                                | Not a CPG. No TG specific<br>recommendation.     |
| 23 | doi:10.1093/hropen/hoz025                                                                                                                                                                                                                            |                                                  |
| 24 | Dahl M, Feldman JL, Goldberg J, <i>et al.</i> Endocrine Therapy for Transgender Adults in British Columbia: Suggested Guidelines Physical Aspects of                                                                                                 | Single country.                                  |
| 25 | Transgender Endocrine Therapy. 2015. <a href="http://www.phsa.ca/transcarebc/Documents/HealthProf/BC-Trans-Adult-Endocrine-Guidelines-2015.pdf">http://www.phsa.ca/transcarebc/Documents/HealthProf/BC-Trans-Adult-Endocrine-Guidelines-2015.pdf</a> |                                                  |
| 26 | Davies S. The Evidence Behind the Practice: A Review of WPATH Suggested Guidelines in Transgender Voice and Communication. <i>Perspect ASHA</i>                                                                                                      | Single author.                                   |
| 27 | <i>Spec Interes Groups</i> 2017; <b>2</b> :64–73. doi:10.1044/persp2.SIG10.64                                                                                                                                                                        |                                                  |
| 28 | De Antonio IE, Gómez-Gil E. Coordination of healthcare for transsexual persons: A multidisciplinary approach. <i>Curr Opin Endocrinol Diabetes Obes</i>                                                                                              | Not a CPG.                                       |
| 29 | 2013; <b>20</b> :585–91. doi:10.1097/01.med.0000436182.42966.31                                                                                                                                                                                      |                                                  |
| 30 | de Haan G, Santos G-M, Arayasirikul S, <i>et al.</i> Non-Prescribed Hormone Use and Barriers to Care for Transgender Women in San Francisco. <i>LGBT Heal</i>                                                                                        | Not a CPG.                                       |
| 31 | 2015; <b>2</b> :313–23. doi:10.1089/lgbt.2014.0128                                                                                                                                                                                                   |                                                  |
| 32 | de Vries ALC, Cohen-Kettenis PT. Clinical management of gender dysphoria in children and adolescents: The Dutch approach. <i>J Homosex</i>                                                                                                           | Not a CPG.                                       |
| 33 | 2012; <b>59</b> :301–20. doi:10.1080/00918369.2012.653300                                                                                                                                                                                            |                                                  |
| 34 | Dèttore D, Ristori J, Antonelli P, <i>et al.</i> Gender dysphoria in adolescents: The need for a shared assessment protocol and proposal of the AGIR protocol.                                                                                       | Not a CPG.                                       |
| 35 | <i>J Psychopathol</i> 2015; <b>21</b> :152–8.                                                                                                                                                                                                        |                                                  |
| 36 | Deutsch MB, Green J, Keatley JA, <i>et al.</i> Electronic medical records and the transgender patient: Recommendations from the world professional                                                                                                   | Not a CPG. Single country.                       |
| 37 | association for Transgender Health EMR working group. <i>J Am Med Informatics Assoc</i> 2013; <b>20</b> :700–3. doi:10.1136/amiajnl-2012-001472                                                                                                      |                                                  |
| 38 | Devon Partnership NHS Trust. PG12 Pharmacological Treatment of Gender Dysphoria. 2015. <a href="https://www.gires.org.uk/wp-content/uploads/2014/08/PG12-GenderDysphoria.pdf">https://www.gires.org.uk/wp-</a>                                       | Single country.                                  |
| 39 | <a href="https://www.gires.org.uk/wp-content/uploads/2014/08/PG12-GenderDysphoria.pdf">content/uploads/2014/08/PG12-GenderDysphoria.pdf</a>                                                                                                          |                                                  |
| 40 | Etienne Tollinche L, Burrows Walters C, Radix A, <i>et al.</i> The perioperative care of the transgender patient. <i>Anesth Analg</i> 2018; <b>127</b> :359–66.                                                                                      | Not a CPG. Single country.                       |
| 41 | doi:10.1213/ANE.00000000000003371                                                                                                                                                                                                                    |                                                  |
| 42 | European Society of Human Genetics. Genetic testing in asymptomatic minors: Recommendations of the European Society of Human Genetics. <i>Eur J</i>                                                                                                  | No TG specific recommendation.<br>Single author. |
| 43 | <i>Hum Genet</i> 2009; <b>17</b> :720–1. doi:10.1038/ejhg.2009.26                                                                                                                                                                                    |                                                  |
| 44 |                                                                                                                                                                                                                                                      |                                                  |
| 45 |                                                                                                                                                                                                                                                      |                                                  |
| 46 |                                                                                                                                                                                                                                                      |                                                  |
| 47 |                                                                                                                                                                                                                                                      |                                                  |

|    |                                                                                                                                                                                                                                                                                                                                                                    |                                  |
|----|--------------------------------------------------------------------------------------------------------------------------------------------------------------------------------------------------------------------------------------------------------------------------------------------------------------------------------------------------------------------|----------------------------------|
| 1  |                                                                                                                                                                                                                                                                                                                                                                    |                                  |
| 2  | Finlayson C, Johnson EK, Chen D, <i>et al.</i> Proceedings of the Working Group Session on Fertility Preservation for Individuals with Gender and Sex                                                                                                                                                                                                              | Not a CPG.                       |
| 3  | Diversity. <i>Transgender Heal</i> 2016; <b>1</b> :99–107. doi:10.1089/trgh.2016.0008                                                                                                                                                                                                                                                                              |                                  |
| 4  | Fisher CB, Fried AL, Desmond M, <i>et al.</i> Perceived barriers to HIV prevention services for transgender youth. <i>LGBT Heal</i> 2018; <b>5</b> :350–8.                                                                                                                                                                                                         | Not a CPG.                       |
| 5  | doi:10.1089/lgbt.2017.0098                                                                                                                                                                                                                                                                                                                                         |                                  |
| 6  | Francis C, Grober E, Potter E, <i>et al.</i> A Simple Guide for Simple Orchiectomy in Transition-Related Surgeries. <i>Sex Med Rev</i> 2020; <b>3</b> –7.                                                                                                                                                                                                          | Not a CPG. Single country.       |
| 7  | doi:10.1016/j.sxmr.2019.11.004                                                                                                                                                                                                                                                                                                                                     |                                  |
| 8  | Fraser L. Psychotherapy in the world professional association for transgender health's standards of care: Background and recommendations. <i>Int J Transgenderism</i> 2009; <b>11</b> :110–26. doi:10.1080/15532730903008057                                                                                                                                       | Not a CPG. Single author.        |
| 9  |                                                                                                                                                                                                                                                                                                                                                                    |                                  |
| 10 | Gamble RM, Taylor SS, Huggins AD, <i>et al.</i> Trans-specific Geriatric Health Assessment (TGHA): An inclusive clinical guideline for the geriatric                                                                                                                                                                                                               | Not a CPG. Single country.       |
| 11 | transgender patient in a primary care setting. <i>Maturitas</i> 2020; <b>132</b> :70–5. doi:10.1016/j.maturitas.2019.12.005                                                                                                                                                                                                                                        |                                  |
| 12 | GIRES. Guidance for GPs , other clinicians and health professionals on the care of gender variant people Transgender wellbeing and healthcare. UK                                                                                                                                                                                                                  | Single country. Out of date.     |
| 13 | Dep. Heal. 2008. <a href="https://midessexccg.nhs.uk/medicines-optimisation/clinical-pathways-and-medication-guidelines/chapter-6-endocrine-system-2/1142-guidance-for-gps-and-hormone-treatment-for-gender-dysphoria-1/file">https://midessexccg.nhs.uk/medicines-optimisation/clinical-pathways-and-medication-guidelines/chapter-6-endocrine-system-2/1142-</a> |                                  |
| 14 | <a href="https://midessexccg.nhs.uk/medicines-optimisation/clinical-pathways-and-medication-guidelines/chapter-6-endocrine-system-2/1142-guidance-for-gps-and-hormone-treatment-for-gender-dysphoria-1/file">guidance-for-gps-and-hormone-treatment-for-gender-dysphoria-1/file</a>                                                                                |                                  |
| 15 | Goeckenjan M, Glaß K, Torka S, <i>et al.</i> Indications for fertility preservation. <i>Gynakologische Endokrinol</i> 2019; <b>7</b> :1–7. doi:10.1007/s10304-019-0241-3                                                                                                                                                                                           | Not a CPG. Single country.       |
| 16 | Griffith C, Akers W, Dispenza F, <i>et al.</i> Standards of Care for Research with Participants Who Identify as LGBTQ+. <i>J LGBT Issues Couns</i> 2017; <b>11</b> :212–                                                                                                                                                                                           | Not a CPG. Single country        |
| 17 | 29. doi:10.1080/15538605.2017.1380549                                                                                                                                                                                                                                                                                                                              |                                  |
| 18 | Guidance on Gender Dysphoria for Nurses. <i>Nurs Stand</i> 2013; <b>28</b> :10. doi:10.7748/ns2013.10.28.9.10.s10                                                                                                                                                                                                                                                  | Not a CPG.                       |
| 19 | Hagen DB, Galupo MP. Trans* Individuals' Experiences of Gendered Language with Health Care Providers: Recommendations for Practitioners. <i>Int J Transgenderism</i> 2014; <b>15</b> :16–34. doi:10.1080/15532739.2014.890560                                                                                                                                      | Not a CPG.                       |
| 20 |                                                                                                                                                                                                                                                                                                                                                                    |                                  |
| 21 | Hamidi O, Davidge-Pitts CJ. Transfeminine Hormone Therapy. <i>Endocrinol Metab Clin North Am</i> 2019; <b>48</b> :341–55. doi:10.1016/j.ecl.2019.02.001                                                                                                                                                                                                            | Not a CPG. Single country.       |
| 22 | Health Policy Project, Asia Pacific Transgender Network, United Nations Development Programme. <i>Blueprint for the provision of comprehensive care for</i>                                                                                                                                                                                                        | Not a CPG.                       |
| 23 | <i>trans people and trans communities in Asia and the Pacific.</i> Washington, DC: Futures Group, Health Policy Project 2015. <a href="http://www.asia-pacific.undp.org/content/rbap/en/home/library/democratic_governance/hiv_aids/blueprint-for-the-provision-of-comprehensive-care-for-trans-peopl/">http://www.asia-</a>                                       |                                  |
| 24 | <a href="http://www.asia-pacific.undp.org/content/rbap/en/home/library/democratic_governance/hiv_aids/blueprint-for-the-provision-of-comprehensive-care-for-trans-peopl/">pacific.undp.org/content/rbap/en/home/library/democratic_governance/hiv_aids/blueprint-for-the-provision-of-comprehensive-care-for-trans-peopl/</a>                                      |                                  |
| 25 | Heidari S, Babor TF, De Castro P, <i>et al.</i> Sex and Gender Equity in Research: rationale for the SAGER guidelines and recommended use. <i>Res Integr</i>                                                                                                                                                                                                       | Not a CPG.                       |
| 26 | <i>Peer Rev</i> 2016; <b>1</b> :1–9. doi:10.1186/s41073-016-0007-6                                                                                                                                                                                                                                                                                                 |                                  |
| 27 | Hembree W, Cohen-Kettenis P, Gooren L, <i>et al.</i> Endocrine treatment of gender-dysphoric/ gender-incongruent persons: an endocrine society clinical                                                                                                                                                                                                            | Reprint of included paper (fully |
| 28 | practice guideline. <i>Endocr Pract</i> 2017; <b>23</b> :1437–71.                                                                                                                                                                                                                                                                                                  | cited).                          |
| 29 | Hirsch S, Pickering J, Adler R. Meeting the Needs of Trans and Gender Diverse Youth: The Varied, Ubiquitous Role of the Speech-Language                                                                                                                                                                                                                            | Not a CPG. Single country.       |
| 30 | Pathologist in Voice and Communication Therapy/Training. <i>Perspect ASHA Spec Interes Groups</i> 2019; <b>4</b> :111–7. doi:10.1044/2018_PERS-SIG3-2018-                                                                                                                                                                                                          |                                  |
| 31 | 0016                                                                                                                                                                                                                                                                                                                                                               |                                  |
| 32 | House H, Gaines S, Hawkins LA. Sexual and Gender Minority Adolescents: Meeting the Needs of Our LGBTQ Patients and Their Families. <i>Clin Pediatr</i>                                                                                                                                                                                                             | Not a CPG. Single country.       |
| 33 | <i>Emerg Med</i> 2019; <b>20</b> :9–16. doi:10.1016/j.cpem.2019.02.004                                                                                                                                                                                                                                                                                             |                                  |
| 34 | Hughes LD, Berzin OKG, Leung M, <i>et al.</i> Adapting Healthcare Quality Measures to Transgender Individuals. <i>LGBT Heal</i> 2017; <b>4</b> :248–51.                                                                                                                                                                                                            | Not a CPG. Single country.       |
| 35 | doi:10.1089/lgbt.2017.0009                                                                                                                                                                                                                                                                                                                                         |                                  |
| 36 | Human Rights Campaign, American Academy of Pediatrics, American College of Osteopathic Pediatricians. Supporting & Caring for Transgender                                                                                                                                                                                                                          | Not a CPG. Single country.       |
| 37 | Children. 2016. <a href="http://hrc.im/supportingtranschildren">http://hrc.im/supportingtranschildren</a>                                                                                                                                                                                                                                                          |                                  |
| 38 | IAPAC. IAPAC Protocols for the Integrated Management of HIV and Noncommunicable Diseases. <i>Int Assoc Provid AIDS care</i> Published Online First:                                                                                                                                                                                                                | No TG specific recommendation.   |
| 39 | 2018. <a href="https://www.iapac.org/files/2018/07/IAPAC-Protocols-for-the-Integrated-Management-of-HIV-and-Noncommunicable-Diseases_3.pdf">https://www.iapac.org/files/2018/07/IAPAC-Protocols-for-the-Integrated-Management-of-HIV-and-Noncommunicable-Diseases_3.pdf</a>                                                                                        |                                  |
| 40 | IMAP. IMAP Statement on hormone therapy for transgender people. Published Online First: 2015.                                                                                                                                                                                                                                                                      | Not a CPG.                       |
| 41 | <a href="https://www.ipdf.org/sites/default/files/ipdf_imap_transgender.pdf">https://www.ipdf.org/sites/default/files/ipdf_imap_transgender.pdf</a>                                                                                                                                                                                                                |                                  |
| 42 | In Case You Haven't Heard. <i>Mental Health Weekly</i> 2015; <b>25</b> :8-8. doi:10.1002/mhw.30307                                                                                                                                                                                                                                                                 | Not a CPG.                       |
| 43 | International Association for the Study of Pain. <i>Guide to Pain Management in Low-Resource Settings.</i> Seattle: : IASP 2010. <a href="https://ebooks.iasp-">https://ebooks.iasp-</a>                                                                                                                                                                           | Not a CPG. No TG specific        |
| 44 |                                                                                                                                                                                                                                                                                                                                                                    |                                  |
| 45 |                                                                                                                                                                                                                                                                                                                                                                    |                                  |
| 46 |                                                                                                                                                                                                                                                                                                                                                                    |                                  |
| 47 |                                                                                                                                                                                                                                                                                                                                                                    |                                  |

|    |                                                                                                                                                                                                                                                                                                                                                                                  |                                    |
|----|----------------------------------------------------------------------------------------------------------------------------------------------------------------------------------------------------------------------------------------------------------------------------------------------------------------------------------------------------------------------------------|------------------------------------|
| 1  |                                                                                                                                                                                                                                                                                                                                                                                  |                                    |
| 2  | <a href="http://pain.org/guide_to_pain_management_in_low_resource_settings">pain.org/guide_to_pain_management_in_low_resource_settings</a>                                                                                                                                                                                                                                       | recommendation.                    |
| 3  | International Association of Physicians in AIDS Care. IAPAC – Blueprint to Address the Sexual and Reproductive Health Care and STI/HIV Prevention                                                                                                                                                                                                                                | No TG specific recommendation.     |
| 4  | Needs of Adolescent Girls and Young Women. Published Online First: 2011. <a href="https://www.iapac.org/guidance/recommendations/blueprint-to-address-the-sexual-and-reproductive-health-care-and-sti-hiv-prevention-needs-of-adolescent-girls-and-young-women-in-latin-america-and-the-caribbean/">https://www.iapac.org/guidance/recommendations/blueprint-to-address-the-</a> |                                    |
| 5  | <a href="https://www.iapac.org/guidance/recommendations/blueprint-to-address-the-sexual-and-reproductive-health-care-and-sti-hiv-prevention-needs-of-adolescent-girls-and-young-women-in-latin-america-and-the-caribbean/">sexual-and-reproductive-health-care-and-sti-hiv-prevention-needs-of-adolescent-girls-and-young-women-in-latin-america-and-the-caribbean/</a>          |                                    |
| 6  | International Association of Providers in AIDS Care. Recommendations for the rapid expansion of HIV self-testing in Fast-Track Cities. Published Online                                                                                                                                                                                                                          | No TG specific recommendation.     |
| 7  | First: 2017. <a href="http://www.iapac.org/uploads/IAPAC-ASLM-HIVST-FTC-Recommendations-012617.pdf">http://www.iapac.org/uploads/IAPAC-ASLM-HIVST-FTC-Recommendations-012617.pdf</a>                                                                                                                                                                                             |                                    |
| 8  | International Planned Parenthood Federation. IPPF. Hormonal contraception: recommendations for women at high risk of HIV. Published Online First:                                                                                                                                                                                                                                | Not a CPG. No TG specific          |
| 9  | 2017. <a href="http://www.ippf.org/sites/default/files/2017-07/ippf_technical_brief_HC_HIV_June2017.pdf">http://www.ippf.org/sites/default/files/2017-07/ippf_technical_brief_HC_HIV_June2017.pdf</a>                                                                                                                                                                            | recommendation.                    |
| 10 | International Planned Parenthood Federation. Putting sexuality back into Comprehensive Sexuality Education: making the case for a rights-based, sex-                                                                                                                                                                                                                             | Not a CPG. No TG specific          |
| 11 | positive approach. Published Online First: 2016. <a href="https://www.ippf.org/sites/default/files/2016-10/Putting_Sexuality_back_into_Comprehensive_Sexuality_Education_0.pdf">https://www.ippf.org/sites/default/files/2016-10/Putting_Sexuality_back_into_Comprehensive_Sexuality</a>                                                                                         | recommendation.                    |
| 12 | <a href="https://www.ippf.org/sites/default/files/2016-10/Putting_Sexuality_back_into_Comprehensive_Sexuality_Education_0.pdf">Education_0.pdf</a>                                                                                                                                                                                                                               |                                    |
| 13 | Jungwirth, A; Diemer, T; Kopa, Z; Krausz, C; Minhas, S; Tournaye H. <i>EAU Guidelines on Male Infertility</i> . European Association of Urology 2018.                                                                                                                                                                                                                            | Superseded by 2020 CPG with        |
| 14 |                                                                                                                                                                                                                                                                                                                                                                                  | no TG recommendations              |
| 15 | Kaltiala-Heino R, Bergman H, Työläjärvi M, et al. Gender dysphoria in adolescence: current perspectives. <i>Adolesc Health Med Ther</i> 2018; <b>9</b> :31–41.                                                                                                                                                                                                                   | Not a CPG.                         |
| 16 | doi:10.2147/AHMT.S135432                                                                                                                                                                                                                                                                                                                                                         |                                    |
| 17 | Karasic DH, Fraser L. Multidisciplinary Care and the Standards of Care for Transgender and Gender Nonconforming Individuals. <i>Clin Plast Surg</i>                                                                                                                                                                                                                              | Derivative, not de novo.           |
| 18 | 2018; <b>45</b> :295–9. doi:10.1016/j.cps.2018.03.016                                                                                                                                                                                                                                                                                                                            |                                    |
| 19 | Kemp K, Dibley L, Chauhan U, et al. Second N-ECCO Consensus Statements on the European Nursing Roles in Caring for Patients with Crohn's                                                                                                                                                                                                                                         | No TG specific recommendation.     |
| 20 | Disease or Ulcerative Colitis. <i>J Crohn's Colitis</i> 2018; <b>12</b> :760–76. doi:10.1093/ecco-jcc/jjy020                                                                                                                                                                                                                                                                     |                                    |
| 21 | Khosla S, Davidge-Pitts C. Skeletal considerations in the medical treatment of transgender people. <i>Lancet Diabetes Endocrinol</i> 2019; <b>7</b> :893–5.                                                                                                                                                                                                                      | Not a CPG.                         |
| 22 | doi:10.1016/S2213-8587(19)30353-5                                                                                                                                                                                                                                                                                                                                                |                                    |
| 23 | Klein DA, Malcolm NM, Berry-Bibee EN, et al. Quality Primary Care and Family Planning Services for LGBT Clients: A Comprehensive Review of Clinical                                                                                                                                                                                                                              | Not a CPG. No TG specific          |
| 24 | Guidelines. <i>LGBT Health</i> . 2018; <b>5</b> :153-170. Doi:10.1089/lgbt.2017.0213                                                                                                                                                                                                                                                                                             | recommendation. Derivative, not    |
| 25 |                                                                                                                                                                                                                                                                                                                                                                                  | de novo. Single country.           |
| 26 | Klein M, Sathasivam A, Novoa Y, et al. Recent Consensus Statements in Pediatric Endocrinology: A Selective Review. <i>Pediatr Clin North Am</i>                                                                                                                                                                                                                                  | Not CPG. Derivative not de novo.   |
| 27 | 2011; <b>58</b> :1301–15. doi:10.1016/j.pcl.2011.07.014                                                                                                                                                                                                                                                                                                                          | No TG specific recommendation.     |
| 28 | LGBT Health Program. <i>Guidelines and Protocols for Hormone Therapy and Primary Health Care for Trans Clients</i> . Toronto: Sherbourne Health Centre                                                                                                                                                                                                                           | Single country. Single author.     |
| 29 | 2015. <a href="http://sherbourne.on.ca/lgbt-health/guidelines-protocols-for-trans-care/">http://sherbourne.on.ca/lgbt-health/guidelines-protocols-for-trans-care/</a>                                                                                                                                                                                                            |                                    |
| 30 | MacDonald S, Smith S. Dermatologists guide to cultural competency and the LGBTIQ patient. <i>Australas J Dermatol</i> 2018; <b>59</b> :85.                                                                                                                                                                                                                                       | Not a CPG.                         |
| 31 | Martinez C, Rikhi R, Haque T, et al. Gender Identity, Hormone Therapy, and Cardiovascular Disease Risk. <i>Curr Probl Cardiol</i> 2020; <b>45</b> .                                                                                                                                                                                                                              | Not a CPG.                         |
| 32 | doi:10.1016/j.cpcardiol.2018.09.003                                                                                                                                                                                                                                                                                                                                              |                                    |
| 33 | Meyenburg B, Korte A, Moller B, et al. Gender identity disorders in childhood and adolescence (F64) / Störungen der Geschlechtsidentität im Kindes-                                                                                                                                                                                                                              | Not a CPG.                         |
| 34 | und Jugendalter (F64). <i>Prax Kinderpsychol Kinderpsychiatr</i> 2014; <b>63</b> :542–52.                                                                                                                                                                                                                                                                                        |                                    |
| 35 | Moreno-Pérez Ó, Esteva De Antonio I. Clinical practice guidelines for assessment and treatment of transsexualism. SEEN Identity and Sexual                                                                                                                                                                                                                                       | Single country. Derivative, not de |
| 36 | Differentiation Group (GIDSEEN). <i>Endocrinol y Nutr (English Ed)</i> 2012; <b>59</b> :367–82. doi:10.1016/j.endoen.2012.07.004                                                                                                                                                                                                                                                 | novo.                              |
| 37 | NHS England. Interim Gender Dysphoria Protocol and Service Guideline 2013/14. Published Online First: 2013. <a href="https://www.gendergp.com/wp-content/uploads/2016/03/NHS-Gender-Protocol.pdf">https://www.gendergp.com/wp-</a>                                                                                                                                               | Not a CPG. Single country.         |
| 38 | <a href="https://www.gendergp.com/wp-content/uploads/2016/03/NHS-Gender-Protocol.pdf">content/uploads/2016/03/NHS-Gender-Protocol.pdf</a>                                                                                                                                                                                                                                        |                                    |
| 39 | Oliphant J, Veale J, Macdonald J, et al. Guidelines for Gender Affirming Healthcare for Gender Diverse and Transgender Children, Young People and                                                                                                                                                                                                                                | Single country.                    |
| 40 | Adults in Aotearoa, New Zealand. <i>N Z Med J</i> 2018; <b>131</b> :86–96. <a href="http://www.ncbi.nlm.nih.gov/pubmed/30543615">http://www.ncbi.nlm.nih.gov/pubmed/30543615</a>                                                                                                                                                                                                 |                                    |
| 41 | Olson J, Schragger SM, Clark LF, et al. Subcutaneous Testosterone: An Effective Delivery Mechanism for Masculinizing Young Transgender Men. <i>LGBT</i>                                                                                                                                                                                                                          | Not a CPG.                         |
| 42 | <i>Heal</i> 2014; <b>1</b> :165–7. doi:10.1089/lgbt.2014.0018                                                                                                                                                                                                                                                                                                                    |                                    |
| 43 | Pan American Health Organization [PAHO], John Snow Inc., World Professional Association for Transgender Health, et al. <i>Blueprint for the Provision of</i>                                                                                                                                                                                                                     | Not a CPG.                         |

|    |                                                                                                                                                                                                                                                                                                                                                                                                                                                                                                                                                                                                                         |                                |
|----|-------------------------------------------------------------------------------------------------------------------------------------------------------------------------------------------------------------------------------------------------------------------------------------------------------------------------------------------------------------------------------------------------------------------------------------------------------------------------------------------------------------------------------------------------------------------------------------------------------------------------|--------------------------------|
| 1  |                                                                                                                                                                                                                                                                                                                                                                                                                                                                                                                                                                                                                         |                                |
| 2  | <i>Comprehensive Care for Trans Persons and Their Communities in the Caribbean and Other Anglophone Countries</i> . Arlington VA: John Snow Inc 2014.                                                                                                                                                                                                                                                                                                                                                                                                                                                                   |                                |
| 3  | <a href="https://www.paho.org/hq/dmdocuments/2014/2014-cha-blueprint-comprehensive-anglo-countries.pdf">https://www.paho.org/hq/dmdocuments/2014/2014-cha-blueprint-comprehensive-anglo-countries.pdf</a>                                                                                                                                                                                                                                                                                                                                                                                                               |                                |
| 4  | Pan American Health Organization. <i>Blueprint for the Provision of Comprehensive Care to Gay Men and Other Men Who Have Sex with Men (MSM) in Latin America and the Caribbean</i> . Washington, D.C.: 2010                                                                                                                                                                                                                                                                                                                                                                                                             | No TG specific recommendation. |
| 5  |                                                                                                                                                                                                                                                                                                                                                                                                                                                                                                                                                                                                                         |                                |
| 6  | Patel JM, Dolitsky S, Bachman GA, <i>et al</i> . Gynecologic cancer screening in the transgender male population and its current challenges. <i>Maturitas</i>                                                                                                                                                                                                                                                                                                                                                                                                                                                           | Not a CPG. Single country.     |
| 7  | 2019; <b>129</b> :40–4. doi:10.1016/j.maturitas.2019.08.009                                                                                                                                                                                                                                                                                                                                                                                                                                                                                                                                                             |                                |
| 8  | Phillips JC, Patsdaughter CA. Toward a Healthier Tomorrow: Competent Health and HIV Care for Transgender Persons. <i>J Assoc Nurses AIDS Care</i>                                                                                                                                                                                                                                                                                                                                                                                                                                                                       | Not a CPG.                     |
| 9  | 2010; <b>21</b> :183–5. doi:10.1016/j.jana.2010.02.009                                                                                                                                                                                                                                                                                                                                                                                                                                                                                                                                                                  |                                |
| 10 | Potter J, Peitzmeier SM, Bernstein I, <i>et al</i> . Cervical Cancer Screening for Patients on the Female-to-Male Spectrum: a Narrative Review and Guide for Clinicians. <i>J Gen Intern Med</i> 2015; <b>30</b> :1857–64. doi:10.1007/s11606-015-3462-8                                                                                                                                                                                                                                                                                                                                                                | Not a CPG.                     |
| 11 |                                                                                                                                                                                                                                                                                                                                                                                                                                                                                                                                                                                                                         |                                |
| 12 | Pratt-Chapman M, Potter J. Cancer Care Considerations for Sexual and Gender Minority Patients. <i>Oncol Issues</i> 2019; <b>34</b> :26–36. <a href="https://www.acccancer.org/docs/documents/oncology-issues/articles/nd19/nd19-cancer-care-considerations-for-sexual-and-gender-minority-patients.pdf?sfvrsn=d116445f_2">https://www.acccancer.org/docs/documents/oncology-issues/articles/nd19/nd19-cancer-care-considerations-for-sexual-and-gender-minority-patients.pdf?sfvrsn=d116445f_2</a>                                                                                                                      | Not a CPG. Single country.     |
| 13 |                                                                                                                                                                                                                                                                                                                                                                                                                                                                                                                                                                                                                         |                                |
| 14 | Psychological Society of South Africa. <i>Practice Guidelines For Psychology Professionals Working With Sexually And Gender-Diverse People</i> . Johannesburg: Psychological Society of South Africa 2017. <a href="https://www.psyssa.com/wp-content/uploads/2018/04/PsySSA-Diversity-Competence-Practice-Guidelines-PRINT-singlesided.pdf">https://www.psyssa.com/wp-content/uploads/2018/04/PsySSA-Diversity-Competence-Practice-Guidelines-PRINT-singlesided.pdf</a>                                                                                                                                                | Single country.                |
| 15 |                                                                                                                                                                                                                                                                                                                                                                                                                                                                                                                                                                                                                         |                                |
| 16 | Radix A, Sevelius J, Deutsch MB. Transgender women, hormonal therapy and HIV treatment: A comprehensive review of the literature and recommendations for best practices. <i>J Int AIDS Soc</i> 2016; <b>19</b> :1–8. doi:10.7448/IAS.19.3.20810                                                                                                                                                                                                                                                                                                                                                                         | Not a CPG.                     |
| 17 |                                                                                                                                                                                                                                                                                                                                                                                                                                                                                                                                                                                                                         |                                |
| 18 | Reilly M, Desousa V, Garza-Flores A, <i>et al</i> . Young Children With Gender Nonconforming Behaviors and Preferences. <i>J Dev Behav Pediatr</i> 2019; <b>40</b> :60–71. doi:10.1097/DBP.0000000000000612                                                                                                                                                                                                                                                                                                                                                                                                             | Not a CPG. Single country.     |
| 19 |                                                                                                                                                                                                                                                                                                                                                                                                                                                                                                                                                                                                                         |                                |
| 20 | Reisner SL, Pardo ST, Gamarel KE, <i>et al</i> . Substance use to cope with stigma in healthcare among U.S. female-to-male trans masculine adults. <i>LGBT Heal</i> 2015; <b>2</b> :324–32. doi:10.1089/lgbt.2015.0001                                                                                                                                                                                                                                                                                                                                                                                                  | Not a CPG.                     |
| 21 |                                                                                                                                                                                                                                                                                                                                                                                                                                                                                                                                                                                                                         |                                |
| 22 | Safer JD, Tangpricha V. Care of Transgender persons. <i>N Engl J Med</i> 2019; <b>381</b> :2451–60. doi:10.1056/NEJMcp1903650                                                                                                                                                                                                                                                                                                                                                                                                                                                                                           | Not a CPG. Single country.     |
| 23 |                                                                                                                                                                                                                                                                                                                                                                                                                                                                                                                                                                                                                         |                                |
| 24 | Salas-Humara C, Sequeira GM, Rossi W, <i>et al</i> . Gender affirming medical care of transgender youth. <i>Curr Probl Pediatr Adolesc Health Care</i> 2019; <b>49</b> :1–21. doi:10.1016/j.cppeds.2019.100683                                                                                                                                                                                                                                                                                                                                                                                                          | Not a CPG. Single country.     |
| 25 |                                                                                                                                                                                                                                                                                                                                                                                                                                                                                                                                                                                                                         |                                |
| 26 | Schechter LS, D'Arpa S, Cohen MN, <i>et al</i> . Gender Confirmation Surgery: Guiding Principles. <i>J Sex Med</i> 2017; <b>14</b> :852–6. doi:10.1016/j.jsxm.2017.04.001                                                                                                                                                                                                                                                                                                                                                                                                                                               | Not a CPG.                     |
| 27 |                                                                                                                                                                                                                                                                                                                                                                                                                                                                                                                                                                                                                         |                                |
| 28 | Selvaggi G, Dhejne C, Landen M, <i>et al</i> . The 2011 WPATH standards of care and penile reconstruction in female-to-male transsexual individuals. <i>Adv Urol</i> 2012; <b>2012</b> . doi:10.1155/2012/581712                                                                                                                                                                                                                                                                                                                                                                                                        | Not a CPG.                     |
| 29 |                                                                                                                                                                                                                                                                                                                                                                                                                                                                                                                                                                                                                         |                                |
| 30 | Shpherd JC, Kauth MR, Firek AF, <i>et al</i> . Interdisciplinary Transgender Veteran Care: Development of a Core Curriculum for VHA Providers. <i>Transgender Heal</i> 2016; <b>1</b> :54–62. doi:10.1089/trgh.2015.0004                                                                                                                                                                                                                                                                                                                                                                                                | Not a CPG.                     |
| 31 |                                                                                                                                                                                                                                                                                                                                                                                                                                                                                                                                                                                                                         |                                |
| 32 | Shumer DE, Reisner SL, Edwards-Leeper L, <i>et al</i> . Evaluation of Asperger Syndrome in Youth Presenting to a Gender Dysphoria Clinic. <i>LGBT Heal</i> 2016; <b>3</b> :387–90. doi:10.1089/lgbt.2015.0070                                                                                                                                                                                                                                                                                                                                                                                                           | Not a CPG.                     |
| 33 |                                                                                                                                                                                                                                                                                                                                                                                                                                                                                                                                                                                                                         |                                |
| 34 | Speiser PW, Arlt W, Auchus RJ, <i>et al</i> . Congenital Adrenal Hyperplasia Due to Steroid 21-Hydroxylase Deficiency: An Endocrine Society* Clinical Practice Guideline. <i>J Clin Endocrinol Metab</i> 2018; <b>103</b> :4043–88. doi:10.1210/jc.2018-01865                                                                                                                                                                                                                                                                                                                                                           | No TG specific recommendation. |
| 35 |                                                                                                                                                                                                                                                                                                                                                                                                                                                                                                                                                                                                                         |                                |
| 36 | Staples JM, Bird ER, Masters TN, <i>et al</i> . Considerations for Culturally Sensitive Research With Transgender Adults: A Qualitative Analysis. <i>J Sex Res</i> 2018; <b>55</b> :1065–76. doi:10.1080/00224499.2017.1292419                                                                                                                                                                                                                                                                                                                                                                                          | Not a CPG. Single country.     |
| 37 |                                                                                                                                                                                                                                                                                                                                                                                                                                                                                                                                                                                                                         |                                |
| 38 | Subramanyam A, Mukherjee A, Dave M, <i>et al</i> . Clinical practice guidelines for autism spectrum disorders. <i>Indian J Psychiatry</i> 2019; <b>61</b> :254. doi:10.4103/psychiatry.IndianJPsychiatry_542_18                                                                                                                                                                                                                                                                                                                                                                                                         | Single country.                |
| 39 |                                                                                                                                                                                                                                                                                                                                                                                                                                                                                                                                                                                                                         |                                |
| 40 | Telfer MM, Tollit MA, Pace CC, <i>et al</i> . <i>Australian Standards of Care and Treatment Guidelines for Trans and Gender Diverse Children and Adolescents Version 1.1</i> . Melbourne: The Royal Children's Hospital 2018. <a href="https://www.rch.org.au/uploadedFiles/Main/Content/adolescent-medicine/australian-standards-of-care-and-treatment-guidelines-for-trans-and-gender-diverse-children-and-adolescents.pdf">https://www.rch.org.au/uploadedFiles/Main/Content/adolescent-medicine/australian-standards-of-care-and-treatment-guidelines-for-trans-and-gender-diverse-children-and-adolescents.pdf</a> | Single country.                |
| 41 |                                                                                                                                                                                                                                                                                                                                                                                                                                                                                                                                                                                                                         |                                |
| 42 | The Lancet. New guidelines on transgender health. <i>Lancet</i> 2013; <b>382</b> :1460. doi:10.1016/S0140-6736(13)62277-1                                                                                                                                                                                                                                                                                                                                                                                                                                                                                               | Not a CPG.                     |
| 43 |                                                                                                                                                                                                                                                                                                                                                                                                                                                                                                                                                                                                                         |                                |
| 44 |                                                                                                                                                                                                                                                                                                                                                                                                                                                                                                                                                                                                                         |                                |
| 45 |                                                                                                                                                                                                                                                                                                                                                                                                                                                                                                                                                                                                                         |                                |
| 46 |                                                                                                                                                                                                                                                                                                                                                                                                                                                                                                                                                                                                                         |                                |
| 47 |                                                                                                                                                                                                                                                                                                                                                                                                                                                                                                                                                                                                                         |                                |

|    |                                                                                                                                                                                                                                                                                               |                                |
|----|-----------------------------------------------------------------------------------------------------------------------------------------------------------------------------------------------------------------------------------------------------------------------------------------------|--------------------------------|
| 1  |                                                                                                                                                                                                                                                                                               |                                |
| 2  | Thibaut F, Bradford JMW, Briken P, <i>et al.</i> The World Federation of Societies of Biological Psychiatry (WFSBP) guidelines for the treatment of adolescent                                                                                                                                | No TG specific recommendation. |
| 3  | sexual offenders with paraphilic disorders. <i>World J Biol Psychiatry</i> 2016; <b>17</b> :2–38. doi:10.3109/15622975.2015.1085598                                                                                                                                                           |                                |
| 4  | Tonnesen P, Carrozzi L, Fagerstrom KO, <i>et al.</i> Smoking cessation in patients with respiratory diseases: a high priority, integral component of therapy.                                                                                                                                 | No TG specific recommendation. |
| 5  | <i>Eur Respir J</i> 2007; <b>29</b> :390–417. doi:10.1183/09031936.00060806                                                                                                                                                                                                                   |                                |
| 6  | Trans Guidance for CoFE Schools. <i>Ther Today</i> 2017; <b>28</b> :7. <a href="https://www.bacp.co.uk/media/2350/bacp-therapy-today-dec17.pdf">https://www.bacp.co.uk/media/2350/bacp-therapy-today-dec17.pdf</a>                                                                            | Not a CPG.                     |
| 7  | UCSF Transgender Care. <i>Guidelines for the Primary and Gender-Affirming Care of Transgender and Gender Nonbinary People</i> . 2nd ed. San Francisco:                                                                                                                                        | Single country.                |
| 8  | Department of Family and Community Medicine University of California San Francisco 2016. <a href="https://transcare.ucsf.edu/guidelines">https://transcare.ucsf.edu/guidelines</a>                                                                                                            |                                |
| 9  | Vale K, Johnson TW, Jansen MS, <i>et al.</i> The development of standards of care for individuals with a male-to-eunuch gender identity disorder. <i>Int J</i>                                                                                                                                | Not a CPG.                     |
| 10 | <i>Transgenderism</i> 2010; <b>12</b> :40–51. doi:10.1080/15532731003749095                                                                                                                                                                                                                   |                                |
| 11 | Walton HM, Baker SL. Treating Transgender Individuals in Inpatient and Residential Mental Health Settings. <i>Cogn Behav Pract</i> 2019; <b>26</b> :592–602.                                                                                                                                  | Not a CPG. Single country.     |
| 12 | doi:10.1016/j.cbpra.2017.09.006                                                                                                                                                                                                                                                               |                                |
| 13 | Webb AJ, McManus D, Rouse GE, <i>et al.</i> Implications for medication dosing for transgender patients: A review of the literature and recommendations for                                                                                                                                   | Single country.                |
| 14 | pharmacists. <i>Am J Heal Pharm</i> 2020; <b>77</b> :427–33. doi:10.1093/ajhp/zxz355                                                                                                                                                                                                          |                                |
| 15 | Whitehead-Pleaux A, Donnenwerth A, Robinson B, <i>et al.</i> Lesbian, gay, bisexual, transgender, and questioning: Best practices in music therapy. <i>Music</i>                                                                                                                              | Not a CPG. Single country.     |
| 16 | <i>Ther Perspect</i> 2012; <b>30</b> :158–66. doi:10.1093/mtp/30.2.158                                                                                                                                                                                                                        |                                |
| 17 | Wood BR, Spach DH. HIV in Sexual and Gender Minority Populations. <i>Natl. HIV Curric.</i> 2020. <a href="https://www.hiv.uw.edu/go/key-populations/hiv-sexual-gender-minority-populations/core-concept/all">https://www.hiv.uw.edu/go/key-populations/hiv-sexual-</a>                        | Not a CPG. Single country.     |
| 18 | <a href="https://www.hiv.uw.edu/go/key-populations/hiv-sexual-gender-minority-populations/core-concept/all">gender-minority-populations/core-concept/all</a>                                                                                                                                  |                                |
| 19 | Workowski KA, Bolan GA. Centers for Disease Control and Prevention. Sexually transmitted diseases treatment guidelines, 2015 [published correction                                                                                                                                            | Single country.                |
| 20 | appears in <i>MMWR Recomm Rep.</i> 2015; <b>64</b> :924]. <i>MMWR Recomm Rep.</i> 2015; <b>64</b> :1–137.                                                                                                                                                                                     |                                |
| 21 | World Anti-Doping Program. <i>TUE Physician Guidelines Transgender Athletes</i> . 1.1. 2019. <a href="https://www.wada-ama.org/en/resources/therapeutic-use-exemption-tue/medical-information-to-support-the-decisions-of-tuecs-7">https://www.wada-ama.org/en/resources/therapeutic-use-</a> | Not a CPG.                     |
| 22 | <a href="https://www.wada-ama.org/en/resources/therapeutic-use-exemption-tue/medical-information-to-support-the-decisions-of-tuecs-7">exemption-tue/medical-information-to-support-the-decisions-of-tuecs-7</a>                                                                               |                                |
| 23 | World Health Organization. <i>Consolidated guidelines on HIV prevention, diagnosis, treatment and care for key populations</i> . 2014.                                                                                                                                                        | Superseded (2016 version       |
| 24 | <a href="http://apps.who.int/iris/bitstream/10665/128048/1/9789241507431_eng.pdf?ua=1">http://apps.who.int/iris/bitstream/10665/128048/1/9789241507431_eng.pdf?ua=1</a>                                                                                                                       | included).                     |
| 25 | World Health Organization. <i>Guidelines on HIV self-testing and partner notification: supplement to consolidated guidelines on HIV testing services</i> . 2016.                                                                                                                              | No TG specific recommendation. |
| 26 | <a href="https://www.who.int/hiv/pub/vct/hiv-self-testing-guidelines/en/">https://www.who.int/hiv/pub/vct/hiv-self-testing-guidelines/en/</a>                                                                                                                                                 |                                |
| 27 | World Health Organization. <i>Preventing Suicide A Community Engagement Toolkit</i> . 2018.                                                                                                                                                                                                   | Not a CPG. No TG specific      |
| 28 | <a href="https://apps.who.int/iris/bitstream/handle/10665/272860/9789241513791-eng.pdf">https://apps.who.int/iris/bitstream/handle/10665/272860/9789241513791-eng.pdf</a>                                                                                                                     | recommendation.                |
| 29 | World Health Organization. <i>Priority interventions: HIV/AIDS prevention, treatment and care in the health sector</i> . 2010.                                                                                                                                                                | Not a CPG.                     |
| 30 | <a href="https://www.who.int/hiv/pub/guidelines/9789241500234/en/">https://www.who.int/hiv/pub/guidelines/9789241500234/en/</a>                                                                                                                                                               |                                |
| 31 | Wright E, Grulich A, Roy K, <i>et al.</i> Australasian Society for HIV, Viral Hepatitis and Sexual Health Medicine HIV pre-exposure prophylaxis: clinical                                                                                                                                     | Single country.                |
| 32 | guidelines. Update April 2018. <i>J virus Erad</i> 2018; <b>4</b> :143–59. <a href="http://www.ncbi.nlm.nih.gov/pubmed/30050676">http://www.ncbi.nlm.nih.gov/pubmed/30050676</a>                                                                                                              |                                |
| 33 | Wylie K, Barrett J, Besser M, <i>et al.</i> Good Practice Guidelines for the Assessment and Treatment of Adults with Gender Dysphoria. <i>Sex Relatsh Ther</i>                                                                                                                                | Single country.                |
| 34 | 2014; <b>29</b> :154–214. doi:10.1080/14681994.2014.883353                                                                                                                                                                                                                                    |                                |
| 35 | Yeung H, Luk KM, Chen SC, <i>et al.</i> Dermatologic care for lesbian, gay, bisexual, and transgender persons: Epidemiology, screening, and disease                                                                                                                                           | Not a CPG. Single country.     |
| 36 | prevention. <i>J Am Acad Dermatol</i> 2019; <b>80</b> :591–602. doi:10.1016/j.jaad.2018.02.045                                                                                                                                                                                                |                                |

36 **Key:** CPG = clinical practice guideline; TG = trans people/gender minority



## W4: Extracted sentences relating to mortality or quality of life with associated references from Clinical Practice

### Guidelines

|                                                                                                                                                                                                                                                       | Author (yr)           | In-text statement on Mortality/ Quality of Life (QoL)                                                                                                                                                                                                                                                                                                                                                                                                                                                                                                                                                                                                                                                                                                                                                                                                                                                                                                                                                                                                                                                                                                                                                                                                                                                                                                                                                                                                                                                                                                                                                                                                                                                                                                                                                                                                                                                                                                                                                                                                                                                                                                                                                                                                                                                                                                                                                                                                                                                                                                                                                                                                                                                                                                                                                                                     | Page    | References                                                                                                                                                                                                                                                                                                                                                                                                                                                      |
|-------------------------------------------------------------------------------------------------------------------------------------------------------------------------------------------------------------------------------------------------------|-----------------------|-------------------------------------------------------------------------------------------------------------------------------------------------------------------------------------------------------------------------------------------------------------------------------------------------------------------------------------------------------------------------------------------------------------------------------------------------------------------------------------------------------------------------------------------------------------------------------------------------------------------------------------------------------------------------------------------------------------------------------------------------------------------------------------------------------------------------------------------------------------------------------------------------------------------------------------------------------------------------------------------------------------------------------------------------------------------------------------------------------------------------------------------------------------------------------------------------------------------------------------------------------------------------------------------------------------------------------------------------------------------------------------------------------------------------------------------------------------------------------------------------------------------------------------------------------------------------------------------------------------------------------------------------------------------------------------------------------------------------------------------------------------------------------------------------------------------------------------------------------------------------------------------------------------------------------------------------------------------------------------------------------------------------------------------------------------------------------------------------------------------------------------------------------------------------------------------------------------------------------------------------------------------------------------------------------------------------------------------------------------------------------------------------------------------------------------------------------------------------------------------------------------------------------------------------------------------------------------------------------------------------------------------------------------------------------------------------------------------------------------------------------------------------------------------------------------------------------------------|---------|-----------------------------------------------------------------------------------------------------------------------------------------------------------------------------------------------------------------------------------------------------------------------------------------------------------------------------------------------------------------------------------------------------------------------------------------------------------------|
| 1<br>2<br>3<br>4<br>5<br>6<br>7<br>8<br>9<br>10<br>11<br>12<br>13<br>14<br>15<br>16<br>17<br>18<br>19<br>20<br>21<br>22<br>23<br>24<br>25<br>26<br>27<br>28<br>29<br>30<br>31<br>32<br>33<br>34<br>35<br>36<br>37<br>38<br>39<br>40<br>41<br>42<br>43 | Coleman et al. (2012) | <p><b>Mortality:</b> Two long-term observational studies, both retrospective, compared the mortality &amp; psychiatric morbidity of transsexual adults to those of general population samples (Asscheman et al., 2011; Dhejne et al., 2011). An analysis of data from the Swedish National Board of Health &amp; Welfare information registry found that individuals who had received sex reassignment surgery (191 MtF &amp; 133 FtM) had significantly higher rates of mortality, suicide, suicidal behavior, &amp; psychiatric morbidity than those for a nontranssexual control group matched on age, immigrant status, prior psychiatric morbidity, &amp; birth sex (Dhejne et al., 2011). Similarly, a study in the Netherlands reported a higher total mortality rate, including incidence of suicide, in both pre- &amp; post-surgery transsexual patients (966 MtF and 365 FtF) than in the general population of that country (Asscheman et al., 2011). Neither of these studies questioned the efficacy of sex reassignment; indeed, both lacked an adequate comparison group of transsexuals who either did not receive treatment or who received treatment other than genital surgery. Moreover, transsexual people in these studies were treated as far back as the 1970s. However, these findings do emphasize the need to have good long-term psychological &amp; psychiatric care available for this population. More studies are needed that focus on the outcomes of current assessment &amp; treatment approaches for gender dysphoria.</p> <p><b>QoL:</b> One troubling report (Newfield et al., 2006) documented lower scores on QoL (measured with the SF-36) for FtM patients than for the general population. A weakness of that study is that it recruited its 384 participants by a general email rather than a systematic approach, and the degree and type of treatment were not recorded. Study participants who were taking testosterone had typically been doing so for less than 5 years. Reported QoL was higher for patients who had undergone breast/chest surgery than for those who had not (<math>p &lt; .001</math>). (A similar analysis was not done for genital surgery.)</p> <p><b>QoL:</b> In other work, Kuhn &amp; colleagues (2009) used the King's Health Questionnaire to assess the quality of life of 55 transsexual patients at 15 years after surgery. Scores were compared to those of 20 healthy female control patients who had undergone abdominal/pelvic surgery in the past. Quality of life scores for transsexual patients were the same or better than those of control patients for some subscales (emotions, sleep, incontinence, symptom severity, and role limitation), but worse in other domains (general health, physical limitation, and personal limitation).</p> | 108     | <p>Asscheman H, Giltay EJ, Megens JAJ, et al. A long-term follow-up study of mortality in transsexuals receiving treatment with cross-sex hormones. <i>Eur J Endocrinol</i> 2011;<b>164</b>:635–42. doi:10.1530/EJE-10-1038</p> <p>Dhejne C, Lichtenstein P, Boman M, et al. Long-Term Follow-Up of Transsexual Persons Undergoing Sex Reassignment Surgery: Cohort Study in Sweden. <i>PLoS One</i> 2011;<b>6</b>:e16885. doi:10.1371/journal.pone.0016885</p> |
|                                                                                                                                                                                                                                                       | Davies et al. (2015)  | <p><b>QoL:</b> A number of studies indicate that speech-therapy intervention is useful in helping gender nonconforming individuals portray their gender identity through speech (Carew, Dacakis, &amp; Oates, 2007; Dacakis, Oates, &amp; Douglas, 2012; Gelfer &amp; Tice, 2013; Hancock &amp; Garabedian, 2013; Meszaros et al., 2005). Such changes to communication are not simply superficial; they can reduce gender dysphoria and improve mental health and quality of life.</p>                                                                                                                                                                                                                                                                                                                                                                                                                                                                                                                                                                                                                                                                                                                                                                                                                                                                                                                                                                                                                                                                                                                                                                                                                                                                                                                                                                                                                                                                                                                                                                                                                                                                                                                                                                                                                                                                                                                                                                                                                                                                                                                                                                                                                                                                                                                                                   | 117-118 | <p>Carew L, Dacakis G, Oates J. The Effectiveness of Oral Resonance Therapy on the Perception of Femininity of Voice in Male-to-Female Transsexuals. <i>J Voice</i> 2007;<b>21</b>:591–603. doi:10.1016/j.jvoice.2006.05.005</p> <p>Dacakis G, Oates J, Douglas J. Beyond voice. <i>Curr Opin</i></p>                                                                                                                                                           |

|    |             |                                                                                                                                                                                                                                                                                                                                                                                                                                                                                                                                                                                                                                                                                                                                                                                                |    |                                                                                                                                                                                                                                                                                                                                                                                                                                                                                                                                                                                                                                                                                                                                                                                                                                                                                                                                                             |
|----|-------------|------------------------------------------------------------------------------------------------------------------------------------------------------------------------------------------------------------------------------------------------------------------------------------------------------------------------------------------------------------------------------------------------------------------------------------------------------------------------------------------------------------------------------------------------------------------------------------------------------------------------------------------------------------------------------------------------------------------------------------------------------------------------------------------------|----|-------------------------------------------------------------------------------------------------------------------------------------------------------------------------------------------------------------------------------------------------------------------------------------------------------------------------------------------------------------------------------------------------------------------------------------------------------------------------------------------------------------------------------------------------------------------------------------------------------------------------------------------------------------------------------------------------------------------------------------------------------------------------------------------------------------------------------------------------------------------------------------------------------------------------------------------------------------|
| 1  |             |                                                                                                                                                                                                                                                                                                                                                                                                                                                                                                                                                                                                                                                                                                                                                                                                |    | <p><i>Otolaryngol Head Neck Surg</i> 2012;<b>20</b>:165–70. doi:10.1097/MOO.0b013e3283530f85</p> <p>Gelfer MP, Tice RM. Perceptual and Acoustic Outcomes of Voice Therapy for Male-to-Female Transgender Individuals Immediately After Therapy and 15 Months Later. <i>J Voice</i> 2013;<b>27</b>:335–47. doi:10.1016/j.jvoice.2012.07.009</p> <p>Hancock AB, Garabedian LM. Transgender voice and communication treatment: a retrospective chart review of 25 cases. <i>Int J Lang Commun Disord</i> 2013;<b>48</b>:54–65. doi:10.1111/j.1460-6984.2012.00185.x</p> <p>Mészáros K, Csokonai Vitéz L, Szabolcs I, et al. Efficacy of Conservative Voice Treatment in Male-to-Female Transsexuals. <i>Folia Phoniatr Logop</i> 2005;<b>57</b>:111–8. doi:10.1159/000083572</p> <p>* Hancock AB, Krissinger J, Owen K. Voice Perceptions and Quality of Life of Transgender People. <i>J Voice</i> 2011;<b>25</b>:553–8. doi:10.1016/j.jvoice.2010.07.013</p> |
| 17 | ECDC (2018) | <p><b>Mortality:</b> the World Health Organization (WHO) and UNAIDS have identified several targets along the continuum of care for hepatitis B virus (HBV), hepatitis C virus (HCV) and HIV. These <i>include</i> promoting early diagnosis, scaling up treatment and reducing disease-related mortality [12,13].</p>                                                                                                                                                                                                                                                                                                                                                                                                                                                                         | 3  | <p>12. World Health Organization. Global health sector strategy on viral hepatitis 2016–2021: towards ending viral hepatitis. Geneva: WHO; 2016.</p> <p>13. World Health Organization. Global health sector strategy on HIV, 2016–2021: towards ending AIDS. Geneva: WHO; 2016.</p>                                                                                                                                                                                                                                                                                                                                                                                                                                                                                                                                                                                                                                                                         |
| 23 |             | <p><b>QoL (as QALY):</b> Since then, the feasibility of birth cohort testing for HCV has been studied in several European countries, including Ireland, Italy, and Spain [87–89]. In the studies in Ireland and Spain, the authors concluded that to effectively implement birth cohort testing for HCV, each country must determine its own HCV seroprevalence by year in order to successfully develop screening recommendations because risk factors, particularly injecting drug use, can affect the selection of birth cohort. In Italy, authors found that the anti-HCV screening program had an acceptable expenditure increase for the National Health Service compared to the cost per quality-adjusted life year (QALY) of other approved interventions or treatments in Italy."</p> | 18 | <p>87. Group HCSGD. Background to recommendation 20: general population or birth cohort screening. Dublin: Health Protection Surveillance Centre; 2017.</p> <p>88. Ruggeri M, Coretti S, Gasbarrini A, Cicchetti A. Economic assessment of an anti-HCV screening program in Italy. <i>Value Health</i>. 2013;<b>16</b>(6):965–72.</p> <p>89. Mena A, Moldes L, Meijide H, Canizares A, Castro-Iglesias A, Delgado M, et al. Seroprevalence of HCV and HIV infections by year of birth in Spain: impact of US CDC and USPSTF recommendations for HCV and HIV testing. <i>PLoS ONE</i>. 2014;<b>9</b>(12):e113062.</p>                                                                                                                                                                                                                                                                                                                                        |
| 34 |             | <p><b>QALY:</b> Four cost implication studies of HIV testing in hospital settings have been conducted in UK. They show that universal offer testing was highly cost effective if future healthcare costs &amp; QALYs are incorporated into calculations [236-239]</p>                                                                                                                                                                                                                                                                                                                                                                                                                                                                                                                          | 23 | <p>236. Ong KJ, Thornton AC, Fisher M, Hutt R, Nicholson S, Palfreeman A, et al. Estimated cost per HIV infection diagnosed through routine HIV testing offered in acute general medical admission units and general practice settings in England. <i>HIV Medicine</i>. 2016;<b>17</b>(4):247-54.</p> <p>237. Pizzo E, Rayment M, Thornton A, Rae C, Hartney T, Delpech V, et al. Cost-effectiveness analysis of HIV testing in non-traditional settings-the HINTS study. <i>HIV Medicine</i>. 2014;<b>15</b>:93.</p> <p>238. Sewell J, Capocci S, Johnson J, Solamalai A, Hopkins S, Cropley I, et al. Expanded blood borne virus testing in a</p>                                                                                                                                                                                                                                                                                                         |

1  
2  
3  
4  
5  
6  
7  
8  
9  
10  
11  
12  
13  
14  
15  
16  
17  
18  
19  
20  
21  
22  
23  
24  
25  
26  
27  
28  
29  
30  
31  
32  
33  
34  
35  
36  
37  
38  
39  
40  
41  
42  
43  
44  
45  
46  
47

|     |                        |                                                                                                                                                                                                                                                                                                                                                                                      |      |                                                                                                                                                                                                                                                                                                                                                                                                                                                    |
|-----|------------------------|--------------------------------------------------------------------------------------------------------------------------------------------------------------------------------------------------------------------------------------------------------------------------------------------------------------------------------------------------------------------------------------|------|----------------------------------------------------------------------------------------------------------------------------------------------------------------------------------------------------------------------------------------------------------------------------------------------------------------------------------------------------------------------------------------------------------------------------------------------------|
|     |                        |                                                                                                                                                                                                                                                                                                                                                                                      |      | tuberculosis clinic. A cost and yield analysis. <i>J Infect.</i> 2015;70(4):317-23.<br>239. Alexander H, Brady M, Poulton M. A calculation of the financial impact of opt-out HIV testing in a London Emergency Department (ED). <i>HIV Med.</i> 2016 April.                                                                                                                                                                                       |
| 4   | Gilligan et al. (2017) | <b>Mortality/QoL:</b> no statements linked to references                                                                                                                                                                                                                                                                                                                             |      |                                                                                                                                                                                                                                                                                                                                                                                                                                                    |
| 5   | Hembree et al. (2017)  | <b>Mortality:</b> Long-term studies from The Netherlands found no increased risk for cardiovascular mortality (161). ... The largest cohort of transgender females (mean age 41 years, followed for a mean of 10 years) showed no increase in cardiovascular mortality despite a 32% rate of tobacco use (161).                                                                      | 3891 | 161. van Kesteren PJM, Asscheman H, Megens JAJ, Gooren LJG. Mortality and morbidity in transsexual subjects treated with cross-sex hormones. <i>Clin Endocrinol (Oxf).</i> 1997;47(3):337-343.                                                                                                                                                                                                                                                     |
|     |                        | <b>Mortality:</b> A systematic review of the literature found that data were insufficient (due to very low-quality evidence) to allow a meaningful assessment of patient-important outcomes, such as death, stroke, myocardial infarction, or VTE in transgender males (176). Future research is needed to ascertain the potential harm of hormonal therapies (176).                 | 3895 | 176. Elamin MB, Garcia MZ, Murad MH, Erwin PJ, Montori VM. Effect of sex steroid use on cardiovascular risk in transsexual individuals: a systematic review and meta-analyses. <i>Clin Endocrinol (Oxf).</i> 2010;72(1):1-10.                                                                                                                                                                                                                      |
|     |                        | <b>Mortality:</b> Another analysis demonstrated that, despite the young average age at death following surgery and the relatively larger number of individuals with somatic morbidity, the study does not allow for determination of causal relationships between, for example, specific types of hormonal or surgical treatment received and somatic morbidity and mortality (263). | 3895 | **263. Djordjevic ML, Bizic MR, Duisin D, Bouman MB, Buncamper M. Reversal Surgery in regretful male-to-female transsexuals after sex reassignment surgery. <i>J Sex Med.</i> 2016;13(6):1000-1007.<br><i>Note title of reference 262:</i><br>262. Simonsen RK, Hald GM, Kristensen E, Giraldi A. Long-term follow-up of individuals undergoing sex-reassignment surgery: somatic morbidity and cause of death. <i>Sex Med.</i> 2016;4(1):e60-e68. |
|     |                        | <b>QoL:</b> Likewise, a meta-analysis of 19 randomized trials in nontransgender males on testosterone replacement showed no increased incidence of cardiovascular events (185).                                                                                                                                                                                                      | 3891 | 185. Calof OM, Singh AB, Lee ML, Kenny AM, Urban RJ, Tenover JL, Bhasin S. Adverse events associated with testosterone replacement in middle-aged and older men: a meta-analysis of randomized, placebo-controlled trials. <i>J Gerontol A Biol Sci Med Sci.</i> 2005;60(11):1451-1457.                                                                                                                                                            |
| 306 | IAPHCCO (2015)         | <b>Mortality:</b> The Strategic Timing of AntiRetroviral Treatment (START) study recently showed a 53% reduction in serious morbidity and mortality from HIV due to early ART at CD4 counts of over 500 cells/mm3 (96)                                                                                                                                                               | 6    | 96. Lundgren JD, Babiker AG, Gordin F, et al. Initiation of antiretroviral therapy in early asymptomatic HIV infection. <i>N Engl J Med.</i> 2015;373(9):795-807.                                                                                                                                                                                                                                                                                  |
|     |                        | <b>Mortality</b> Increasing early access to ART is associated with decreased AIDS-related morbidity and mortality, as well as reduced risk of HIV transmission (167)                                                                                                                                                                                                                 | 8    | 167. Grinsztejn B, Hosseinipour MC, Ribaud HJ, et al. Effects of early versus delayed initiation of antiretroviral treatment on clinical outcomes of HIV-1 infection: results from the phase 3 HPTN 052 randomised controlled trial. <i>Lancet Infect Dis.</i> 2014;14(4):281-290.                                                                                                                                                                 |
|     |                        | <b>Mortality:</b> Antiretroviral therapy is proven to prevent HIV-related morbidity, mortality, and transmission.(7)                                                                                                                                                                                                                                                                 | 9    | 7. Montaner JS, Lima VD, Harrigan PR, et al. Expansion of HAART coverage is associated with sustained decreases in HIV/AIDS morbidity, mortality and HIV transmission: the "HIV Treatment as Prevention" experience in a Canadian setting. <i>PLoS One.</i> 2014; 9(2):e87872.                                                                                                                                                                     |

1  
2  
3  
4  
5  
6  
7  
8  
9  
10  
11  
12  
13  
14  
15  
16  
17  
18  
19  
20  
21  
22  
23  
24  
25  
26  
27  
28  
29  
30  
31  
32  
33  
34  
35  
36  
37  
38  
39  
40  
41  
42  
43  
44  
45  
46  
47

|      |                      |                                                                                                                                                                                                                                                                                   |     |                                                                                                                                                                                                                                                                                                                                                                                                                                                                                                                                                               |
|------|----------------------|-----------------------------------------------------------------------------------------------------------------------------------------------------------------------------------------------------------------------------------------------------------------------------------|-----|---------------------------------------------------------------------------------------------------------------------------------------------------------------------------------------------------------------------------------------------------------------------------------------------------------------------------------------------------------------------------------------------------------------------------------------------------------------------------------------------------------------------------------------------------------------|
|      |                      | <b>Mortality:</b> Community-located ART distribution is a cost-effective service delivery model whose rates of attrition and mortality are similar to those at the facility level. (195,196)                                                                                      | 10  | 195. Kredt T, Ford N, Adeniyi FB, Garner P. Decentralising HIV treatment in lower- and middle-income countries. Cochrane Database Syst Rev. 2013;6:CD009987.<br>196. Chu C, Umanski G, Blank A, Grossberg R, Selwyn PA. HIVinfected patients and treatment outcomes: an equivalence study of community-located, primary care-based HIV treatment vs. hospital-based specialty care in the Bronx, New York. AIDS Care. 2010;22(12):1522–1529.                                                                                                                  |
|      |                      | <b>Mortality</b> In Uganda, ART distribution at community-based sites was found to be associated with significantly higher rates of retention in care and lower mortality rates. (88, 204)                                                                                        | 10  | 88. Wamboga Magawa J, Mpiima D. Community ART Delivery Model for High Retention of Patients on Antiretroviral Therapy: The AIDS Support Organisation (TASO) Operational Research Findings East and Central Uganda, Resource-Limited Setting. Presented at: 7th IAS Conference on HIV Pathogenesis, Treatment and Prevention; June 30-July 3, 2013; Kuala Lumpur, Malaysia.<br>204. Grimsrud A, Patten G, Sharp J, Myer L, Wilkinson L, Bekker LG. Extending dispensing intervals for stable patients on ART. J Acquir Immune Defic Syndr. 2014;66(2):e58–e60. |
|      |                      | <b>Mortality /QoL:</b> Today, a person diagnosed with HIV at the age of 20 years if started promptly on ART is expected to live a normal life span, with a highly preserved quality of life.(1)                                                                                   | 1   | 1. Samji H, Cescon A, Hogg RS, et al. Closing the gap: increases in life expectancy among treated HIV-positive individuals in the United States and Canada. PLoS One. 2013; 8(12):e81355.                                                                                                                                                                                                                                                                                                                                                                     |
|      |                      | <b>QoL:</b> Stigma can negatively shape quality of life, affect mental health, and influence ART use and outcomes.<br><b>QoL:</b> Mental health disorders such as these can result in a poorer quality of life and negatively affect access to and use of HIV services."          | 5   | No linked reference                                                                                                                                                                                                                                                                                                                                                                                                                                                                                                                                           |
|      |                      | <b>QoL:</b> Impact of actions taken to reduce stigma & discrimination & address mental health from a quality-of-life perspective (eg, interventions and programs) on these issues as well as on HIV-related health outcomes.                                                      | 18  | No linked reference                                                                                                                                                                                                                                                                                                                                                                                                                                                                                                                                           |
| 297  | Ralph et al (2010)   | <b>Mortality/QoL:</b> no statements linked to references                                                                                                                                                                                                                          |     |                                                                                                                                                                                                                                                                                                                                                                                                                                                                                                                                                               |
| 318  | Strang et al (2016)  | <b>Mortality/QoL:</b> no statements linked to references                                                                                                                                                                                                                          |     |                                                                                                                                                                                                                                                                                                                                                                                                                                                                                                                                                               |
| 339  | T'Sjoen et al (2020) | <b>QoL:</b> Although the quality of sexual life improves after GAMI, research has demonstrated that it does not reach the levels of cisgender people.(44)                                                                                                                         | 575 | 44. Nobili A, Glazebrook C, Arcelus J. Quality of life of treatment seeking transgender adults: a systematic review and metaanalysis. Rev Endocr Metab Disord 2018;19:199-220.                                                                                                                                                                                                                                                                                                                                                                                |
|      |                      | <b>QoL:</b> Overall results lean toward favorable sexual outcomes after genital surgeries in trans people, although research into the quality of sexual life in the trans population after GAMI is limited.(44)                                                                   | 580 | 44. Nobili A, Glazebrook C, Arcelus J. Quality of life of treatment seeking transgender adults: a systematic review and metaanalysis. Rev Endocr Metab Disord 2018;19:199-220.                                                                                                                                                                                                                                                                                                                                                                                |
| 3910 | WHO (2011)           | <b>Mortality:</b> A systematic literature search was conducted on the role of HTC in reducing HIV-related morbidity and mortality, compared with the provision of basic information on HIV prevention and care. The surrogate outcomes were behavioural change and HIV incidence. | 39  | No direct reference, appears to relate to the systematic review                                                                                                                                                                                                                                                                                                                                                                                                                                                                                               |

|    |            |                                                                                                                                                                                                                                                                                                                                                                                                                                                                                                                                                                                                            |    |                                                                                                                                                                                                                                                                                                                                                                                                                                                            |
|----|------------|------------------------------------------------------------------------------------------------------------------------------------------------------------------------------------------------------------------------------------------------------------------------------------------------------------------------------------------------------------------------------------------------------------------------------------------------------------------------------------------------------------------------------------------------------------------------------------------------------------|----|------------------------------------------------------------------------------------------------------------------------------------------------------------------------------------------------------------------------------------------------------------------------------------------------------------------------------------------------------------------------------------------------------------------------------------------------------------|
| 1  |            |                                                                                                                                                                                                                                                                                                                                                                                                                                                                                                                                                                                                            |    |                                                                                                                                                                                                                                                                                                                                                                                                                                                            |
| 2  |            | <b>Mortality:</b> Alcohol and substance use/dependence is a problem for many MSM and transgender people, and is linked to significant morbidity and mortality.(52)                                                                                                                                                                                                                                                                                                                                                                                                                                         | 53 | 52. Stall R et al. Alcohol use, drug use and alcohol-related problems among men who have sex with men: the Urban Men's Health Study. <i>Addiction</i> , 2001, 96:1589–1601.                                                                                                                                                                                                                                                                                |
| 3  |            |                                                                                                                                                                                                                                                                                                                                                                                                                                                                                                                                                                                                            |    |                                                                                                                                                                                                                                                                                                                                                                                                                                                            |
| 4  |            |                                                                                                                                                                                                                                                                                                                                                                                                                                                                                                                                                                                                            |    |                                                                                                                                                                                                                                                                                                                                                                                                                                                            |
| 5  |            | <b>Mortality:</b> OST has been demonstrated to improve both access and adherence to ART, and reduce mortality.(120)                                                                                                                                                                                                                                                                                                                                                                                                                                                                                        | 54 | 120. WHO, UNODC, UNAIDS. <i>Technical guide for countries to set targets for universal access to HIV prevention, treatment and care for injecting drug users, including access to needle syringe programmes</i> . Geneva, WHO, 2009. <a href="http://www.unodc.org/documents/hiv-aids/idu_target_setting_guide.pdf">http://www.unodc.org/documents/hiv-aids/idu_target_setting_guide.pdf</a> (accessed 13 April 2011).                                     |
| 6  |            |                                                                                                                                                                                                                                                                                                                                                                                                                                                                                                                                                                                                            |    |                                                                                                                                                                                                                                                                                                                                                                                                                                                            |
| 7  |            |                                                                                                                                                                                                                                                                                                                                                                                                                                                                                                                                                                                                            |    |                                                                                                                                                                                                                                                                                                                                                                                                                                                            |
| 8  |            |                                                                                                                                                                                                                                                                                                                                                                                                                                                                                                                                                                                                            |    |                                                                                                                                                                                                                                                                                                                                                                                                                                                            |
| 9  |            |                                                                                                                                                                                                                                                                                                                                                                                                                                                                                                                                                                                                            |    |                                                                                                                                                                                                                                                                                                                                                                                                                                                            |
| 10 |            |                                                                                                                                                                                                                                                                                                                                                                                                                                                                                                                                                                                                            |    |                                                                                                                                                                                                                                                                                                                                                                                                                                                            |
| 11 |            | <b>Mortality:</b> Antiretroviral therapy (ART) is the core pharmacological component of a broad and comprehensive management of HIV infection. ART has significantly decreased the morbidity and mortality from HIV in the past decades. Given that ART represents a biologically targeted intervention, where sexual identities play a minimal role or no role at all on expected effects, there is no reason, biological or other, to differentiate ART recommendations for MSM and transgender people from those formulated for other populations (excluding HIV-infected pregnant women and newborns). | 57 | No direct reference, appears to come from the systematic review                                                                                                                                                                                                                                                                                                                                                                                            |
| 12 |            |                                                                                                                                                                                                                                                                                                                                                                                                                                                                                                                                                                                                            |    |                                                                                                                                                                                                                                                                                                                                                                                                                                                            |
| 13 |            |                                                                                                                                                                                                                                                                                                                                                                                                                                                                                                                                                                                                            |    |                                                                                                                                                                                                                                                                                                                                                                                                                                                            |
| 14 |            |                                                                                                                                                                                                                                                                                                                                                                                                                                                                                                                                                                                                            |    |                                                                                                                                                                                                                                                                                                                                                                                                                                                            |
| 15 |            |                                                                                                                                                                                                                                                                                                                                                                                                                                                                                                                                                                                                            |    |                                                                                                                                                                                                                                                                                                                                                                                                                                                            |
| 16 |            |                                                                                                                                                                                                                                                                                                                                                                                                                                                                                                                                                                                                            |    |                                                                                                                                                                                                                                                                                                                                                                                                                                                            |
| 17 |            |                                                                                                                                                                                                                                                                                                                                                                                                                                                                                                                                                                                                            |    |                                                                                                                                                                                                                                                                                                                                                                                                                                                            |
| 18 |            | <b>QoL:</b> There was no evidence available on issues of quality of life such as inconvenience or decreased desire; however, the values and preferences of the MSM polled by MSMGF showed support for this intervention.(66)                                                                                                                                                                                                                                                                                                                                                                               | 33 | 66 Arreola S et al. <i>In our own words: preferences, values, and perspectives on HIV prevention and treatment – a civil society consultation with men who have sex with men and transgender people</i> . Oakland, California, The Global Forum on MSM and HIV (MSMGF), 2010. <a href="http://msmgf.org/files/msmgf/About_Us/Publications/WHO_Report_1.pdf">http://msmgf.org/files/msmgf/About_Us/Publications/WHO_Report_1.pdf</a> (accessed 19 May 2011) |
| 19 |            |                                                                                                                                                                                                                                                                                                                                                                                                                                                                                                                                                                                                            |    |                                                                                                                                                                                                                                                                                                                                                                                                                                                            |
| 20 |            |                                                                                                                                                                                                                                                                                                                                                                                                                                                                                                                                                                                                            |    |                                                                                                                                                                                                                                                                                                                                                                                                                                                            |
| 21 |            |                                                                                                                                                                                                                                                                                                                                                                                                                                                                                                                                                                                                            |    |                                                                                                                                                                                                                                                                                                                                                                                                                                                            |
| 22 |            |                                                                                                                                                                                                                                                                                                                                                                                                                                                                                                                                                                                                            |    |                                                                                                                                                                                                                                                                                                                                                                                                                                                            |
| 23 |            |                                                                                                                                                                                                                                                                                                                                                                                                                                                                                                                                                                                                            |    |                                                                                                                                                                                                                                                                                                                                                                                                                                                            |
| 24 |            | <b>QoL:</b> No considerations regarding quality of life such as inconvenience or decreased sexual desire were studied.                                                                                                                                                                                                                                                                                                                                                                                                                                                                                     | 35 | No direct reference, appears to come from the systematic review                                                                                                                                                                                                                                                                                                                                                                                            |
| 25 |            |                                                                                                                                                                                                                                                                                                                                                                                                                                                                                                                                                                                                            |    |                                                                                                                                                                                                                                                                                                                                                                                                                                                            |
| 26 |            | <b>QoL:</b> No studies were found with information on issues related to quality of life due to the intervention.                                                                                                                                                                                                                                                                                                                                                                                                                                                                                           | 44 | No direct reference, appears to come from the systematic review                                                                                                                                                                                                                                                                                                                                                                                            |
| 27 |            |                                                                                                                                                                                                                                                                                                                                                                                                                                                                                                                                                                                                            |    |                                                                                                                                                                                                                                                                                                                                                                                                                                                            |
| 28 |            |                                                                                                                                                                                                                                                                                                                                                                                                                                                                                                                                                                                                            |    |                                                                                                                                                                                                                                                                                                                                                                                                                                                            |
| 29 |            | <b>QoL:</b> Quality of life (inconvenience, unnecessary intervention, anxiety and discrimination) was not measured.                                                                                                                                                                                                                                                                                                                                                                                                                                                                                        | 44 | No direct reference, appears to come from the systematic review                                                                                                                                                                                                                                                                                                                                                                                            |
| 30 |            |                                                                                                                                                                                                                                                                                                                                                                                                                                                                                                                                                                                                            |    |                                                                                                                                                                                                                                                                                                                                                                                                                                                            |
| 31 |            | <b>QoL:</b> None of the studies reported on HIV or STI incidence or quality of life.                                                                                                                                                                                                                                                                                                                                                                                                                                                                                                                       | 46 | No direct reference, appears to come from the systematic review                                                                                                                                                                                                                                                                                                                                                                                            |
| 32 |            |                                                                                                                                                                                                                                                                                                                                                                                                                                                                                                                                                                                                            |    |                                                                                                                                                                                                                                                                                                                                                                                                                                                            |
| 33 |            | <b>QoL:</b> People living with HIV, regardless of ART indication, should also benefit from basic HIV prevention and care, including effective interventions that are simple, relatively inexpensive, improve the quality of life, prevent further transmission of HIV or common opportunistic infections, delay progression of HIV disease and prevent mortality.                                                                                                                                                                                                                                          | 59 | No linked reference                                                                                                                                                                                                                                                                                                                                                                                                                                        |
| 34 |            |                                                                                                                                                                                                                                                                                                                                                                                                                                                                                                                                                                                                            |    |                                                                                                                                                                                                                                                                                                                                                                                                                                                            |
| 35 |            |                                                                                                                                                                                                                                                                                                                                                                                                                                                                                                                                                                                                            |    |                                                                                                                                                                                                                                                                                                                                                                                                                                                            |
| 36 |            |                                                                                                                                                                                                                                                                                                                                                                                                                                                                                                                                                                                                            |    |                                                                                                                                                                                                                                                                                                                                                                                                                                                            |
| 37 | WHO (2012) | <b>QoL (as QALY):</b> Using sexual risk behaviour data from the Partners in Prevention trial (16), the cost per HIV infection averted was between US\$6000 and \$66 000 when PrEP was always used, and the savings per quality-adjusted life year (QALY), a standard measure of cost-benefit, was \$260 to \$4900. Using "more typical" data that assume less risky sexual behaviour, the cost per HIV infection averted was between ~\$0 (break-even) and \$26 000 when PrEP was always used, and the cost per QALY gained was between minus \$200 (cost-                                                 | 7  | 16. Celum C et al. Acyclovir and transmission of HIV-1 from persons infected with HIV-1 and HSV-2. <i>New England Journal of Medicine</i> , 2010, 362(5):427–439.                                                                                                                                                                                                                                                                                          |
| 38 |            |                                                                                                                                                                                                                                                                                                                                                                                                                                                                                                                                                                                                            |    |                                                                                                                                                                                                                                                                                                                                                                                                                                                            |
| 39 |            |                                                                                                                                                                                                                                                                                                                                                                                                                                                                                                                                                                                                            |    |                                                                                                                                                                                                                                                                                                                                                                                                                                                            |
| 40 |            |                                                                                                                                                                                                                                                                                                                                                                                                                                                                                                                                                                                                            |    |                                                                                                                                                                                                                                                                                                                                                                                                                                                            |
| 41 |            |                                                                                                                                                                                                                                                                                                                                                                                                                                                                                                                                                                                                            |    |                                                                                                                                                                                                                                                                                                                                                                                                                                                            |
| 42 |            |                                                                                                                                                                                                                                                                                                                                                                                                                                                                                                                                                                                                            |    |                                                                                                                                                                                                                                                                                                                                                                                                                                                            |

1  
2  
3  
4  
5  
6  
7  
8  
9  
10  
11  
12  
13  
14  
15  
16  
17  
18  
19  
20  
21  
22  
23  
24  
25  
26  
27  
28  
29  
30  
31  
32  
33  
34  
35  
36  
37  
38  
39  
40  
41  
42  
43  
44  
45  
46  
47

|               |                                                                                                                                                                                                                                                                                                                                                                                                                                                                                                                                                                                                                                                                                                                                                                                                                                                                                                                                                          |       |                                                                                                                                                                                                                                                                                                                                                                                                                                                                                                                                                                                                                                                                                                                                                                                                                                                                                                                                                                                                                                                                                                                                                                                                                                                    |
|---------------|----------------------------------------------------------------------------------------------------------------------------------------------------------------------------------------------------------------------------------------------------------------------------------------------------------------------------------------------------------------------------------------------------------------------------------------------------------------------------------------------------------------------------------------------------------------------------------------------------------------------------------------------------------------------------------------------------------------------------------------------------------------------------------------------------------------------------------------------------------------------------------------------------------------------------------------------------------|-------|----------------------------------------------------------------------------------------------------------------------------------------------------------------------------------------------------------------------------------------------------------------------------------------------------------------------------------------------------------------------------------------------------------------------------------------------------------------------------------------------------------------------------------------------------------------------------------------------------------------------------------------------------------------------------------------------------------------------------------------------------------------------------------------------------------------------------------------------------------------------------------------------------------------------------------------------------------------------------------------------------------------------------------------------------------------------------------------------------------------------------------------------------------------------------------------------------------------------------------------------------|
|               | saving) and \$1900.                                                                                                                                                                                                                                                                                                                                                                                                                                                                                                                                                                                                                                                                                                                                                                                                                                                                                                                                      |       |                                                                                                                                                                                                                                                                                                                                                                                                                                                                                                                                                                                                                                                                                                                                                                                                                                                                                                                                                                                                                                                                                                                                                                                                                                                    |
|               | <b>QoL (as QALY):</b> One cost-effectiveness study in Australia estimated that, if continuous use of PrEP was 90% effective and the program covered only HIV-negative MSM having high-risk sex, it would cost US\$47 745 per QALY gained (18). Another cost-effectiveness study from the USA estimated that if PrEP was 90% effective and the program covered only HIV-negative MSM having high-risk sex, it would cost US\$107 000 per QALY gained (19). If PrEP was 50% effective, it would cost US\$298 000 per QALY gained. Sensitivity analyses showed that the cheaper and more efficacious PrEP is and the more high-risk the population is, the more cost-effective that PrEP would be, with estimates in cost-saving ranging up to over US\$300 000 per QALY gained (20). Overall, cost-effectiveness estimates vary widely, depending on model parameter estimates, including efficacy, cost of PrEP, HIV incidence and age of the population. | 10-11 | 18. Anderson J, Cooper D. Cost-effectiveness of pre-exposure prophylaxis for HIV in an MSM population. <i>HIV Medicine</i> , 2009, 10:39.<br>19. Desai K et al. Modeling the impact of HIV chemoprophylaxis strategies among men who have sex with men in the United States: HIV infections prevented and cost-effectiveness. <i>AIDS</i> , 2008, 22(14):1829–1839.<br>20. Paltiel AD et al. HIV preexposure prophylaxis in the United States: impact on lifetime infection risk, clinical outcomes, and cost-effectiveness. <i>Clinical Infectious Diseases</i> , 2009, 48(6):806–815.                                                                                                                                                                                                                                                                                                                                                                                                                                                                                                                                                                                                                                                            |
| 12 WHO (2016) | <b>Mortality:</b> Access and adherence to OST can improve health outcomes (4), reduce overdose and resulting mortality (54)                                                                                                                                                                                                                                                                                                                                                                                                                                                                                                                                                                                                                                                                                                                                                                                                                              | 33    | 4. Consolidated guidelines on general HIV care and the use of antiretroviral drugs for treating and preventing HIV infection: recommendations for a public health approach. Geneva, World Health Organization, 2013 and Guideline on when to start antiretroviral therapy and on pre-exposure prophylaxis for HIV. Geneva, WHO, 2015 ( <a href="http://www.who.int/iris/bitstream/10665/85321/1/9789241505727_eng.pdf">http://www.who.int/iris/bitstream/10665/85321/1/9789241505727_eng.pdf</a> , accessed 25 February 2014). and Guideline on when to start antiretroviral therapy and on pre-exposure prophylaxis for HIV. Geneva, WHO, 2015.<br><a href="http://apps.who.int/iris/bitstream/10665/186275/1/9789241509565_eng.pdf?ua=154">http://apps.who.int/iris/bitstream/10665/186275/1/9789241509565_eng.pdf?ua=154</a> . Spire B, Lucas GM, Carrieri MP. Adherence to HIV treatment among IDUs and the role of opioid substitution treatment (OST). <i>International Journal of Drug Policy</i> , 2007, 18(4):262–270 ( <a href="https://www.plhivpreventionresources.org/index.cfm?action=main.abstract&amp;id=1460">https://www.plhivpreventionresources.org/index.cfm?action=main.abstract&amp;id=1460</a> accessed 28 February 2014). |
|               | <b>Mortality:</b> Provision of OST before release can help reduce overdose-related mortality (61).                                                                                                                                                                                                                                                                                                                                                                                                                                                                                                                                                                                                                                                                                                                                                                                                                                                       | 35    | 61. Degenhardt L et al. What has been achieved in HIV prevention, treatment and care for people who inject drugs, 2010-2012? A review of the six highest burden countries. <i>International Journal of Drug Policy</i> , 2014, 25:53–60 ( <a href="http://www.sciencedirect.com/science/article/pii/S095539591300128X">http://www.sciencedirect.com/science/article/pii/S095539591300128X</a> , accessed 27 February 2014).                                                                                                                                                                                                                                                                                                                                                                                                                                                                                                                                                                                                                                                                                                                                                                                                                        |
|               | <b>Mortality:</b> Completing TB treatment is critical to reducing mortality and avoiding the development and spread of drug-resistant TB. It is vital to provide a supportive, non-judgemental and non-discriminatory environment that enables people from key populations to complete treatment, provides additional adherence support measures to improve treatment outcomes, and reduces the risk of continued TB transmission (65). Timely initiation of ART significantly reduces the risk of mortality from HIV-associated TB.                                                                                                                                                                                                                                                                                                                                                                                                                     | 64    | 65. Policy guidelines for collaborative TB and HIV services for injecting and other drug users: an integrated approach. Geneva, World Health Organization, 2008 (Evidence for Action Technical Papers) ( <a href="http://whqlibdoc.who.int/publications/2008/9789241596930_eng.pdf">http://whqlibdoc.who.int/publications/2008/9789241596930_eng.pdf</a> accessed 25 February 2014). Integrating collaborative TB and HIV services within a comprehensive package of care for people                                                                                                                                                                                                                                                                                                                                                                                                                                                                                                                                                                                                                                                                                                                                                               |

1  
2  
3  
4  
5  
6  
7  
8  
9  
10  
11  
12  
13  
14  
15  
16  
17  
18  
19  
20  
21  
22  
23  
24  
25  
26  
27

|  |                                                                                                                                                                                                                                                                                                                                                                       |    |                                                                                                                                                                                                                                                                                                                                                                                                                                                                                                                                                                                                                                                                                                                                                                                                                          |
|--|-----------------------------------------------------------------------------------------------------------------------------------------------------------------------------------------------------------------------------------------------------------------------------------------------------------------------------------------------------------------------|----|--------------------------------------------------------------------------------------------------------------------------------------------------------------------------------------------------------------------------------------------------------------------------------------------------------------------------------------------------------------------------------------------------------------------------------------------------------------------------------------------------------------------------------------------------------------------------------------------------------------------------------------------------------------------------------------------------------------------------------------------------------------------------------------------------------------------------|
|  |                                                                                                                                                                                                                                                                                                                                                                       |    | who inject drugs.- Consolidated guidelines. Geneva, WHO, 2016. <a href="http://www.who.int/tb/publications/integrating-collaborative-tb-and-hiv_services_for_pwid/en/">http://www.who.int/tb/publications/integrating-collaborative-tb-and-hiv_services_for_pwid/en/</a>                                                                                                                                                                                                                                                                                                                                                                                                                                                                                                                                                 |
|  | <b>Mortality:</b> Among those living with HIV who are coinfectd with HBV or HCV, liver disease progresses more rapidly and mortality is greater than among those with HBV or HCV who are not living with HIV.                                                                                                                                                         | 67 | No linked reference                                                                                                                                                                                                                                                                                                                                                                                                                                                                                                                                                                                                                                                                                                                                                                                                      |
|  | <b>Mortality:</b> Coinfection with HIV and HCV accelerates HCV-related progression of liver fibrosis and leads to a higher rate of end-stage liver disease and mortality (121, 151, 157).                                                                                                                                                                             | 68 | 121. Benhamou Y et al. Liver fibrosis progression in human immunodeficiency virus and hepatitis C virus coinfectd patients. <i>Hepatology</i> , 1999, 30:1054–1058.<br>151. Deng LP et al. Impact of human immunodeficiency virus infection on the course of hepatitis C virus infection: a meta-analysis. <i>World Journal of Gastroenterology</i> , 2009, 15:996–1003.<br>157. Pineda JA et al. HIV coinfection shortens the survival of patients with hepatitis C virus-related decompensated cirrhosis. <i>Hepatology</i> , 2005, 41:779–789.                                                                                                                                                                                                                                                                        |
|  | <b>Mortality:</b> These effects may be magnified in low-income and food-insecure contexts, such as those experienced by many key populations. In turn, poor nutritional status can hasten the progression of HIV disease; low body mass index (BMI) in adults (BMI less than 18.5 kg/m2) is an independent risk factor for HIV disease progression and mortality (4). | 73 | 4. Consolidated guidelines on general HIV care and the use of antiretroviral drugs for treating and preventing HIV infection: recommendations for a public health approach. Geneva, World Health Organization, 2013 and Guideline on when to start antiretroviral therapy and on pre-exposure prophylaxis for HIV. Geneva, WHO, 2015 ( <a href="http://www.who.int/iris/bitstream/10665/85321/1/9789241505727_eng.pdf">http://www.who.int/iris/bitstream/10665/85321/1/9789241505727_eng.pdf</a> , accessed 25 February 2014). and Guideline on when to start antiretroviral therapy and on pre-exposure prophylaxis for HIV. Geneva, WHO, 2015. <a href="http://apps.who.int/iris/bitstream/10665/186275/1/9789241509565_eng.pdf?ua=1">http://apps.who.int/iris/bitstream/10665/186275/1/9789241509565_eng.pdf?ua=1</a> |

**Key:** ART, antiretroviral therapy; GAMI, gender affirming medical intervention; HIV, human immunodeficiency virus; HTC, HIV testing and counselling; MSM, men who have sex with men; OST, opiate substitution therapy; PrEP, pre-exposure prophylaxis; QALY, Quality-Adjusted Life Year; TB, tuberculosis; \* Reference appears in reference list, but not in the main text; \*\* We believe there is an error here and that the morbidity statement refers to ref 262 not 263. Also noted that references 260 and 261 were the wrong way around.

28  
29  
30  
31  
32  
33  
34  
35  
36  
37  
38  
39  
40  
41  
42  
43  
44  
45  
46  
47

## W5. Extracted Key Recommendations from Clinical Practice Guidelines

| 4<br>5                                                                                                                                                                                                  | Author<br>(year)            | Recommendations                                                                                                                                                                                                                                                                                                                                                                                                                                                                                                                                                                                                                                                                                                                                                                                                                                                                                                                                                                                                                                                                                                                                                                                                                                                                                                                                                                                                                                                                                                                                                                                                                                                                                                                                                                                                                                                                                                                                                                                                                                                                                                                                                                                                                                                                                                                                                                                                                                                                                                                                                                                                                                                                                                                                                                                                                                                                                                                                                                                                                                                                                                                                                                                                                                                                                                                                                                                                                                                                                                                                                                                                                                                                                                                                                                                                                                                                                                                                                                                                                                                                                                                                                                                                                                                                                                                                                                                                                            |
|---------------------------------------------------------------------------------------------------------------------------------------------------------------------------------------------------------|-----------------------------|--------------------------------------------------------------------------------------------------------------------------------------------------------------------------------------------------------------------------------------------------------------------------------------------------------------------------------------------------------------------------------------------------------------------------------------------------------------------------------------------------------------------------------------------------------------------------------------------------------------------------------------------------------------------------------------------------------------------------------------------------------------------------------------------------------------------------------------------------------------------------------------------------------------------------------------------------------------------------------------------------------------------------------------------------------------------------------------------------------------------------------------------------------------------------------------------------------------------------------------------------------------------------------------------------------------------------------------------------------------------------------------------------------------------------------------------------------------------------------------------------------------------------------------------------------------------------------------------------------------------------------------------------------------------------------------------------------------------------------------------------------------------------------------------------------------------------------------------------------------------------------------------------------------------------------------------------------------------------------------------------------------------------------------------------------------------------------------------------------------------------------------------------------------------------------------------------------------------------------------------------------------------------------------------------------------------------------------------------------------------------------------------------------------------------------------------------------------------------------------------------------------------------------------------------------------------------------------------------------------------------------------------------------------------------------------------------------------------------------------------------------------------------------------------------------------------------------------------------------------------------------------------------------------------------------------------------------------------------------------------------------------------------------------------------------------------------------------------------------------------------------------------------------------------------------------------------------------------------------------------------------------------------------------------------------------------------------------------------------------------------------------------------------------------------------------------------------------------------------------------------------------------------------------------------------------------------------------------------------------------------------------------------------------------------------------------------------------------------------------------------------------------------------------------------------------------------------------------------------------------------------------------------------------------------------------------------------------------------------------------------------------------------------------------------------------------------------------------------------------------------------------------------------------------------------------------------------------------------------------------------------------------------------------------------------------------------------------------------------------------------------------------------------------------------------------------|
| 6<br>7<br>8                                                                                                                                                                                             | Coleman<br>et al.<br>(2012) | None. Reviewer team were unable to extract key recommendations                                                                                                                                                                                                                                                                                                                                                                                                                                                                                                                                                                                                                                                                                                                                                                                                                                                                                                                                                                                                                                                                                                                                                                                                                                                                                                                                                                                                                                                                                                                                                                                                                                                                                                                                                                                                                                                                                                                                                                                                                                                                                                                                                                                                                                                                                                                                                                                                                                                                                                                                                                                                                                                                                                                                                                                                                                                                                                                                                                                                                                                                                                                                                                                                                                                                                                                                                                                                                                                                                                                                                                                                                                                                                                                                                                                                                                                                                                                                                                                                                                                                                                                                                                                                                                                                                                                                                                             |
| 9<br>10<br>11<br>12<br>13<br>14<br>15<br>16<br>17<br>18<br>19<br>20<br>21<br>22<br>23<br>24<br>25<br>26<br>27<br>28<br>29<br>30<br>31<br>32<br>33<br>34<br>35<br>36<br>37<br>38<br>39<br>40<br>41<br>42 | Davies et al. (2015)        | <p><i>Voice and Communication Intervention for Gender Nonconforming Individuals</i></p> <ol style="list-style-type: none"> <li>1. Transgender voice and communication services should be offered in the context of a complete approach to transgender health that includes comprehensive primary care and a coordinated approach to psychological and social issues.</li> <li>2. In working with gender nonconforming clients, the speech-language therapist's primary goal is to help the client develop voice and communication that more closely approximates the client's sense of self.</li> <li>3. Feminizing/masculinizing voice involves nonhabitual use of the voice-producing mechanism. To prevent the possibility of vocal damage, professional evaluation and assistance are essential.</li> <li>4. Self-guided voice and communication change without professional supervision is not recommended. Clients intending to pursue self-guided voice change should be encouraged to, at a minimum, have an initial professional assessment and then to consult with their primary care provider if they develop symptoms of vocal fatigue or negative changes to vocal quality. Self-help voice and communication groups should have appropriate clinical support.</li> </ol> <p><i>Clinical Competence</i></p> <ol style="list-style-type: none"> <li>1. Voice and communication professionals working with transgender individuals must have a basic understanding of transgender health (including hormonal and surgical feminization/masculinization) and trans-specific psychosocial issues; they must be familiar with basic sensitivity protocols such as use of preferred gender pronoun and name.</li> <li>2. Gender nonconforming individuals who are seeking voice and communication services for reasons other than speech feminization/masculinization can be treated by trans-sensitive speech-language therapists using standard voice and communication protocols. voice and communication feminization/masculinization requires additional clinical expertise and special clinical protocols.</li> </ol> <p><i>Client Inclusion and Exclusion</i></p> <ol style="list-style-type: none"> <li>1. Voice and communication services should be available to the full spectrum of the transgender community, including MtF and MtF transsexuals and others who are gender nonconforming.</li> <li>2. The need for voice and communication services should not be evaluated based on hormonal use, pursuit of sex reassignment surgery, or length or percentage of time living in the desired gender role.</li> <li>3. Services should be adapted as needed to fit a client's individual needs, including accommodation relating to speech or hearing disability, mental illness, cognitive disability, learning disability, physical disability, geographic isolation, or incarceration.</li> </ol> <p><i>Treatment Decisions</i></p> <ol style="list-style-type: none"> <li>1. The client is responsible for treatment decisions, supported by the clinician's informed professional opinion, assessment data, and any allies the client wishes to be involved. To support fully informed treatment decisions, clients should be informed of the following:       <ol style="list-style-type: none"> <li>a. potential risks and benefits associated with treatment options</li> <li>b. estimated duration of treatment; factors that can influence the duration of treatment</li> </ol> </li> <li>2. Existing protocols for voice and communication feminization should be reviewed and considered when developing individualized treatment plans. As there are no established protocols for speech masculinization, FtMs seeking this service should be informed that the protocol is a trial.</li> <li>3. While modification of existing protocols is encouraged, all treatment plans (including those using new or experimental techniques) are expected to be based on a clearly articulated, logical, and valid clinical rationale. Departure from existing protocols should be explained as such to the client as part of fully informed consent and should be documented in detail to facilitate evaluation.</li> </ol> <p><i>Assessment</i></p> <ol style="list-style-type: none"> <li>1. Assessment prior to voice and communication feminization/masculinization should include the following:</li> </ol> |



1

|                                                                                                                                                                                                                     |                                                                                                                                                                                                                                                                                                                                                                                                                                                                                                                                                                                                                                                                                                                                                                                                                                                                                                                                                                                                                                                                                                                                                                                                                                                                                                                                                                                                                                                                                                                                                                                                                                                                                                                                                                                                                                                                                                                                                                                                                                                                                                                                                                                                                                                                                                                                                                                                                                                                                                                                                                                                                                                                                                                                                                                                                                                                                                                                                                                                                                                                                                                |
|---------------------------------------------------------------------------------------------------------------------------------------------------------------------------------------------------------------------|----------------------------------------------------------------------------------------------------------------------------------------------------------------------------------------------------------------------------------------------------------------------------------------------------------------------------------------------------------------------------------------------------------------------------------------------------------------------------------------------------------------------------------------------------------------------------------------------------------------------------------------------------------------------------------------------------------------------------------------------------------------------------------------------------------------------------------------------------------------------------------------------------------------------------------------------------------------------------------------------------------------------------------------------------------------------------------------------------------------------------------------------------------------------------------------------------------------------------------------------------------------------------------------------------------------------------------------------------------------------------------------------------------------------------------------------------------------------------------------------------------------------------------------------------------------------------------------------------------------------------------------------------------------------------------------------------------------------------------------------------------------------------------------------------------------------------------------------------------------------------------------------------------------------------------------------------------------------------------------------------------------------------------------------------------------------------------------------------------------------------------------------------------------------------------------------------------------------------------------------------------------------------------------------------------------------------------------------------------------------------------------------------------------------------------------------------------------------------------------------------------------------------------------------------------------------------------------------------------------------------------------------------------------------------------------------------------------------------------------------------------------------------------------------------------------------------------------------------------------------------------------------------------------------------------------------------------------------------------------------------------------------------------------------------------------------------------------------------------------|
| <p>2<br/>3<br/>4<br/>5<br/>6<br/>7<br/>8<br/>9<br/>10<br/>11<br/>12<br/>13<br/>14<br/>15<br/>16<br/>17<br/>18<br/>19<br/>20<br/>21<br/>22<br/>23<br/>24<br/>25<br/>26<br/>27<br/>28<br/>29<br/>30<br/>31<br/>32</p> | <p>a. psychosocial, voice use, voice health, and medical history<br/> b. clinical assessment of speech and voice including:<br/>     1.the client's subjective assessment<br/>     2.instrumental measurement<br/>     3.the clinician's subjective analysis<br/>     4.an assessment of potential for change<br/>     5.assistance with understanding therapeutic options<br/> 2.As there is evidence that behavioral changes (of pitch, inflection, resonance, etc.) may degrade over time, periodic re-evaluation is recommended following treatment with further clinical assistance as needed.<br/> <i>Voice and Communication Therapy</i><br/> 1.Voice and communication therapy should be individualized based on each person's goals and identity, the risks and benefits of treatment options, and consideration of social and economic issues.<br/> 2.Rather than adopting a rigid and artificial set of voice and communication norms, it is recommended that clients be assisted to develop an individualized and context-specific set of norms based on communication patterns in their own social, cultural, work, and home environments.<br/> 3.It is clinically optimal to be able to offer both individual sessions and group treatment, with the proportion of time in each format depending on the client's therapeutic needs and goals.<br/> <i>Pitch-Elevating Surgery</i><br/> 1.As there is no professional consensus regarding the effectiveness and risk-benefit ratio of pitch-elevating surgery, care should be taken to ensure that clients are fully informed of potential risks, postoperative care requirements, and possible outcomes (including decreased pitch).<br/> 2.Assessment by both a laryngologist and speech-language therapist is recommended prior to surgery.<br/> 3.Prior to surgery, the laryngologist should discuss after-care instructions with the patient and provide written after-care instructions.<br/> 4.Voice therapy should be offered following phonosurgery to help the patient adapt to and stabilize the new voice.<br/> <i>Outcome Evaluation</i><br/> 1.Outcomes should be rigorously evaluated and documented.<br/> 2.At minimum, the baseline assessment should be repeated immediately following the end of therapy. Ideally, re-evaluation would take place at 6 months, 1 year, 5 years, and 10 years after treatment.<br/> 3.Evaluation should include client satisfaction with the treatment outcome and with the quality of care provided, as well as perceptual and objective measures of voice and communication change.<br/> 4.Informal or formal sharing of outcome data (with colleagues, at conferences, in publications, etc.) must occur only if the client has provided fully informed and voluntary written consent.<br/> <i>Research</i><br/> 1.There is a paucity of data relating to speech feminization/masculinization. Further research in this area is eagerly anticipated.<br/> 2.To ensure that participation in research is voluntary, services should not be offered solely as part of a research protocol.</p> |
|---------------------------------------------------------------------------------------------------------------------------------------------------------------------------------------------------------------------|----------------------------------------------------------------------------------------------------------------------------------------------------------------------------------------------------------------------------------------------------------------------------------------------------------------------------------------------------------------------------------------------------------------------------------------------------------------------------------------------------------------------------------------------------------------------------------------------------------------------------------------------------------------------------------------------------------------------------------------------------------------------------------------------------------------------------------------------------------------------------------------------------------------------------------------------------------------------------------------------------------------------------------------------------------------------------------------------------------------------------------------------------------------------------------------------------------------------------------------------------------------------------------------------------------------------------------------------------------------------------------------------------------------------------------------------------------------------------------------------------------------------------------------------------------------------------------------------------------------------------------------------------------------------------------------------------------------------------------------------------------------------------------------------------------------------------------------------------------------------------------------------------------------------------------------------------------------------------------------------------------------------------------------------------------------------------------------------------------------------------------------------------------------------------------------------------------------------------------------------------------------------------------------------------------------------------------------------------------------------------------------------------------------------------------------------------------------------------------------------------------------------------------------------------------------------------------------------------------------------------------------------------------------------------------------------------------------------------------------------------------------------------------------------------------------------------------------------------------------------------------------------------------------------------------------------------------------------------------------------------------------------------------------------------------------------------------------------------------------|

|                                                                          |                                                                                                                                                                                                                                                                                                                                                                                                                                                                                                                                                                                                                                                                                                                                                                                                                                                                                                                                                                                                                                                                                                                                                                                                                                                                                                                                                                                                                                                                                                                                                                                                                                                                                                                                                                                                           |
|--------------------------------------------------------------------------|-----------------------------------------------------------------------------------------------------------------------------------------------------------------------------------------------------------------------------------------------------------------------------------------------------------------------------------------------------------------------------------------------------------------------------------------------------------------------------------------------------------------------------------------------------------------------------------------------------------------------------------------------------------------------------------------------------------------------------------------------------------------------------------------------------------------------------------------------------------------------------------------------------------------------------------------------------------------------------------------------------------------------------------------------------------------------------------------------------------------------------------------------------------------------------------------------------------------------------------------------------------------------------------------------------------------------------------------------------------------------------------------------------------------------------------------------------------------------------------------------------------------------------------------------------------------------------------------------------------------------------------------------------------------------------------------------------------------------------------------------------------------------------------------------------------|
| <p>33<br/>34<br/>35<br/>36<br/>37<br/>38<br/>39<br/>40<br/>41<br/>42</p> | <p>ECDC (2018)<br/> The ECDC guidance advocates for the development of an integrated national testing strategy or programme for HIV, HBV and HCV. Such integrated testing strategies or programmes should apply the six core testing principles, respect the individual needs of those tested and incorporate evidence-based interventions. Success in increasing the testing uptake should contribute considerably to the elimination of HIV and combat viral hepatitis as public health threat by 2030.<br/> <i>There are six overarching principles for HIV, HBV and HCV testing programmes in this context:</i> · An effective national testing strategy, including a monitoring and evaluation framework, is critical in responding to HIV, HBV and HCV infection. · Testing should be accessible, voluntary, confidential and contingent on informed consent. · Appropriate information should be available before and after testing. · Linkage to care is a critical part of an effective testing programme. · Normalising HIV, HBV and HCV testing in all healthcare settings; and · Those carrying out HIV, HBV and/or HCV testing should receive appropriate training and education.<br/> <i>Who to test?</i><br/> The guidance identifies the following population groups suitable for targeted HIV, HBV and HCV testing due to higher risk of infection and suggest to offer tests to: · men who have sex with men (MSM) · trans* people · people who inject drugs (PWID) · migrants<sup>2</sup> · household contacts of people diagnosed with HBV · homeless people · sex workers · people in prison · pregnant women · haemodialysis patients · people who have received blood products, organs or surgical interventions before adequate safety and quality regulations were enforced;</p> |
|--------------------------------------------------------------------------|-----------------------------------------------------------------------------------------------------------------------------------------------------------------------------------------------------------------------------------------------------------------------------------------------------------------------------------------------------------------------------------------------------------------------------------------------------------------------------------------------------------------------------------------------------------------------------------------------------------------------------------------------------------------------------------------------------------------------------------------------------------------------------------------------------------------------------------------------------------------------------------------------------------------------------------------------------------------------------------------------------------------------------------------------------------------------------------------------------------------------------------------------------------------------------------------------------------------------------------------------------------------------------------------------------------------------------------------------------------------------------------------------------------------------------------------------------------------------------------------------------------------------------------------------------------------------------------------------------------------------------------------------------------------------------------------------------------------------------------------------------------------------------------------------------------|

43  
44  
45  
46  
47

and · sexual or injecting partners of people diagnosed with HIV, HBV and HCV.

#### *Normalising testing*

Making the testing offer a routine and with that making the process similar to those for other diagnostic test, helps to reduce stigma and increases testing uptake. The implementation of indicator condition-guided HIV testing provides a useful complement to targeted HIV testing of groups at higher risk. By providing a clinical rationale for testing, this strategy can also help normalise testing and reduce barriers to it, including issues around stigma among healthcare providers and patients alike.

#### *Where to test?*

The ECDC guidance outlines where, how and when to test for viral hepatitis and HIV by providing evidence-based options of testing strategies that are applicable to all healthcare settings, as well as testing strategies specifically for: · primary healthcare settings · hospital settings · other healthcare settings (e.g. STI clinics, pharmacies, prisons and some drug and harm reduction services) · community settings (including drug and harm reduction services); and · self-sampling and self-testing.

#### *Frequency of testing*

The suggested frequency of testing is<sup>3</sup>: · For those at risk of HIV infection – at least once a year and up to every three months depending on ongoing risk, sexual behaviour, history of sexually transmitted infections, use of pre- or post-exposure prophylaxis (PrEP, PEP) and local HIV prevalence or incidence. · For those at risk of HBV infection – test those at risk who have not had a complete course of HBV vaccinations based on vaccination history. Retesting up to every 6 to 12 months is only suggested if there is an ongoing risk for either unvaccinated people or vaccine non-responders. · For those at risk of HCV infection – consider testing all sex workers, people who inject drugs, trans\* people, prisoners and migrants, and other populations at risk every 6 to 12 months depending on risk profile.

#### *Testing strategies for all settings*

##### *Focus*

In areas of intermediate (HBV/HCV) or high prevalence (HBV/HCV/HIV)<sup>4</sup>: · Consider identifying those who are unaware they are infected through geographically targeted routine testing. · Consider birth cohort or universal one-time testing as option to increase HCV testing coverage, taking into account local epidemiology, affordability and the availability of effective linkage-to-care pathways.

*In addition*: · Test all patients diagnosed with either HIV, HBV and HCV infection for the other two viruses as per guidelines from the European AIDS Clinical Society (EACS)<sup>5</sup> and European Association for the Study of the Liver (EASL)<sup>6,7</sup>. · As per the ECDC antenatal screening guidance<sup>8</sup>: offer pregnant women HBV and HIV tests during the first two trimesters of pregnancy. Offer an HCV test depending on the pregnant woman's risk profile. · Only for women at-risk: repeat HIV testing during pregnancy and HBV testing for those who decline HBV vaccination or are non-responders. · When a woman tests negative for HIV or HCV and has a partner at higher risk, facilitate testing of her partner. If the partner remains untested or risk factors are unknown, consider retesting the mother later in pregnancy. · Voluntary partner notification following a positive diagnosis helps to achieve earlier diagnosis and treatment of exposed (sexual) partners.

#### *Testing in primary healthcare settings*

Evidence shows that HIV, HBV and HCV testing in primary care (PHC) is acceptable and may effectively contribute to increase testing coverage and case detection.

##### *Focus*

Offer integrated testing to any person attending primary care if they: · identify as members of certain risk groups · present with clinical symptoms suggestive of one of three infections; or · show laboratory markers (including elevated liver enzymes) compatible with acute or chronic hepatitis or an HIV indicator condition, including a sexually transmitted infection. Rapid testing, dried blood spot testing and testing using venepuncture are all acceptable in primary care. · Consider offering all patients who were diagnosed with HBV, HCV or HIV a test for the other two viruses.

*Considerations* · Although limited, evidence on general population testing in these settings is also encouraging, at least in intermediate- and high-prevalence regions and birth cohorts. · Available evidence suggests testing coverage in primary care settings is often suboptimal and caused by factors that discourage healthcare professionals from offering tests. Consider interventions to increase test offers, including educational interventions for healthcare staff and clinical decision-making tools. · For testing in PHC settings, appropriate clinical care pathways and referral systems need to be established to ensure better linkage to care for people newly diagnosed with HBV, HCV or HIV in primary care.

#### *Testing in hospital settings*

Testing for HIV, HBV and HCV in hospital settings is generally accepted by patients and staff and can contribute to better testing coverage and case detection among risk groups or people presenting with HIV indicator conditions.

##### *Focus*

Offer integrated testing to any person attending a hospital if they: · identify as members of certain risk groups · present with clinical symptoms suggestive of one of three infections; or · show laboratory markers (including elevated liver enzymes) compatible with acute or chronic hepatitis or an HIV indicator condition, including a sexually transmitted infection. Studies

1

2 indicate that routine testing in emergency departments, including universal testing and integrated testing, is also acceptable to patients and staff in hospitals even though it is currently  
3 supported by limited evidence on its effectiveness.

4 *Considerations* · Test all patients diagnosed with an HIV, HBV and HCV infection in hospital settings for the other two viruses, despite little current evidence on effectiveness. · Even  
5 though there is little evidence of the effectiveness of any specific intervention over any other, education and training programmes for healthcare staff, campaigns and clinical decision-  
6 making tools can support the offer and uptake of integrated testing strategies.

7 *Testing in other healthcare settings*

8 These settings include formal healthcare services (outside hospitals and primary care practices) such as STI, genito-urinary medicine, dermato-venereology and low-threshold clinics,  
9 pharmacies, antenatal, prison health, drug and harm reduction and tuberculosis services.

10 *Focus*

11 Based on available evidence for integrated testing in these specific settings: · Consider offering all patients diagnosed with an HBV, HCV or HIV infection a test for the other two viruses.  
12 · Ensure that people who are newly diagnosed with HBV, HCV or HIV are linked to care given that efficient testing strategies in these surroundings need appropriate pathways to care  
13 and effective referral systems.

14 *Considerations* · Testing for HIV, HBV and HCV, including integrated testing, in such healthcare settings results in varying degrees of effectiveness regarding the increase of testing  
15 coverage and case detection. Limited evidence suggests that rapid diagnostic tests and dried blood spot tests are acceptable and may help to increase testing coverage in such sites. ·  
16 Pharmacies generally offer HIV, HBV and HCV testing under the same quality standards that apply to healthcare settings despite very limited evidence currently on the effectiveness of  
17 this activity. · Harm reduction services offer and suggest HBV and HCV testing to everyone attending drug and harm reduction services and during their initial assessments. Repeat this  
18 offer in case of indicated ongoing risk. · Sites serving migrant populations can look into offering relevant testing to people who come from countries with intermediate (HCV) or high HIV,  
19 HBV and HCV prevalence. · Prison settings can look into offering HIV, HBV and HCV testing to all people in prison as per ECDC guidance on active case finding in prison settings given  
20 the higher prevalence of blood-borne viruses in many prison settings. See also the ECDC/European Monitoring Centre for Drugs and Drug Addiction (EMCDDA) guidance on prevention  
21 and control of blood-borne viruses in prison settings<sup>9</sup>. STI/genito-urinary/dermato-venereology clinics can consider offering HIV testing to anyone seeking care regardless of symptoms  
22 or risk factors as part of the initial screening for STIs according to the International Union against Sexually Transmitted Infections' European guidelines. This includes offering HIV testing  
23 to those who: - have a high likelihood of exposure to HIV - are pregnant regardless of risk factors; or - voluntarily seek testing, especially if never tested before. Based on geographic  
24 prevalence and risk group, it may be appropriate to suggest HBV testing.

25 *Testing in community settings*

26 Community-based testing services refers to programmes and services that offer voluntary HIV and/or HBV, HCV testing outside formal healthcare facilities. They are designed to target  
27 specific population groups and clearly adapted and accessible to those communities.

28 *Focus*

29 There is a role for community-based testing to target groups at higher risk in any national testing strategy. They are acceptable and effective in increasing HIV, HBV and HCV testing  
30 coverage and case detection among these groups. Integrated testing and rapid testing may be offered for everyone accessing drug and harm reduction services in a community or  
31 outreach testing activities. Rapid testing in the community is acceptable and contributes to increased testing coverage when implemented in such settings.

32 Options based on available evidence for integrated testing in these settings: · Linkage to care after HBV and HCV testing in community settings may currently be suboptimal, at least for  
33 certain risk groups. If testing in community settings is considered within a national testing scheme, clear pathways into care and other services have to be developed. This includes  
34 differentiated care pathways for the three infections and other services. · Testing services offered by lay providers help to increase testing opportunities, uptake and coverage.

35 *Self-sampling and self-testing*

36 Self-sampling and self-testing are additional options that give people the flexibility and privacy of performing an initial HIV, HBV and HCV test in their own homes or a place they  
37 consider convenient. To date, there is little scientific evidence on the effectiveness of self-sampling, especially relating to HCV and HBV, to reach any firm conclusions regarding  
38 inclusion in a national testing strategy. There is limited evidence that kits distributed to people attending an STI clinic may increase test coverage and frequency.

39 *Focus*

40 Self-sampling for HIV, HBV and HCV, including possible integrated sampling, is likely acceptable among those most at-risk and may contribute to increased testing coverage and case  
41 detection. Limited available evidence suggests that self-testing for HIV among men who have sex with men is acceptable and may increase testing coverage, frequency and case  
42 detection. Self-sampling kits can be effectively distributed through a variety of channels, such as pharmacies, healthcare settings, outreach activities and online platforms, but should be  
43 based on local circumstances and target populations

44 *Considerations* To ensure effective linkage to care after self-sampling and/or self-testing as part of a testing strategy, clear pathways to care and other services need to be in place or

43

44

45

46

47

developed, including differentiated care pathways for the three infections.

*Contact tracing (includes voluntary partner notification)*

Contact tracing, including partner notification, implies that people who may potentially have been exposed to an infection are informed of this possibility and are offered a test. This can also include other interventions depending on the specific infection. Partner notification is a voluntary process in which a trained provider asks a person diagnosed with HIV, HBV and HCV about details of their sexual partners, at-risk drug injecting partners and household contacts as indicated by the diagnosis and then offers to invite them for a test. The identity of the diagnosed person remains anonymous to the contact unless consent is given.

*Focus*

Even though there is currently limited evidence on the effectiveness of partner notification in increasing testing coverage and case detection, mainly related to HIV, it follows public health logic in response to other communicable diseases to offer voluntary anonymous partner notification to every patient with a newly confirmed diagnosis. There are various strategies to implement partner notification, including passive notification, assisted anonymous notification using a web-based platform and assisted notification with the direct involvement of the service provider.

*Considerations* Current implementation of partner notification processes appears to be suboptimal across Europe. While the success of interventions to increase the coverage of partner notification may depend on local factors, including organisational and legal circumstances, educational interventions targeting healthcare workers may prove to be beneficial.

*Monitoring integrated national testing strategies or programmes for HBV, HCV and HIV*

Monitoring and evaluation is an essential component of any effective testing programme. While strategic information should guide the design of testing initiatives, monitoring and evaluation data permit continuous reevaluation of targets as well as assessment of programme effectiveness, efficiency and impact. Such data can prove invaluable in planning improvements

|                               |                                                                                                                                                                                                                                                                                                                                                                                                                                                                                                                                                                                                                                                                                                                                                                                                                                                                                                                                                                                                                                                                                                                                                                                                                                                                                                                                                                                                                                                                                                                                                                                                                                                                                                                                                                                                                                                                                                                                                                                                                                                                                                                                                                                                                                                                                                                                                                                                                                                                                                                                                                                                                                                                                                                                                                                                                                                                                                                                                                                                                                                                                                                                                                                                                                                                                                                                                                                                                                                                                                                                                                                                                                                                                                                                                     |
|-------------------------------|-----------------------------------------------------------------------------------------------------------------------------------------------------------------------------------------------------------------------------------------------------------------------------------------------------------------------------------------------------------------------------------------------------------------------------------------------------------------------------------------------------------------------------------------------------------------------------------------------------------------------------------------------------------------------------------------------------------------------------------------------------------------------------------------------------------------------------------------------------------------------------------------------------------------------------------------------------------------------------------------------------------------------------------------------------------------------------------------------------------------------------------------------------------------------------------------------------------------------------------------------------------------------------------------------------------------------------------------------------------------------------------------------------------------------------------------------------------------------------------------------------------------------------------------------------------------------------------------------------------------------------------------------------------------------------------------------------------------------------------------------------------------------------------------------------------------------------------------------------------------------------------------------------------------------------------------------------------------------------------------------------------------------------------------------------------------------------------------------------------------------------------------------------------------------------------------------------------------------------------------------------------------------------------------------------------------------------------------------------------------------------------------------------------------------------------------------------------------------------------------------------------------------------------------------------------------------------------------------------------------------------------------------------------------------------------------------------------------------------------------------------------------------------------------------------------------------------------------------------------------------------------------------------------------------------------------------------------------------------------------------------------------------------------------------------------------------------------------------------------------------------------------------------------------------------------------------------------------------------------------------------------------------------------------------------------------------------------------------------------------------------------------------------------------------------------------------------------------------------------------------------------------------------------------------------------------------------------------------------------------------------------------------------------------------------------------------------------------------------------------------------|
| <p>Gilligan et al. (2017)</p> | <ol style="list-style-type: none"> <li>1. Core communication skills               <ol style="list-style-type: none"> <li>1.1. Before each conversation, clinicians should review the patient's medical information, establish goals for the conversation, and anticipate the needs and responses of the patient and family.</li> <li>1.2. At the beginning of conversations with patients, clinicians should explore the patient's understanding of their disease and collaboratively set an agenda with the patient after inquiring what the patient and family wish to address and explaining what the clinician wishes to address.</li> <li>1.3. During patient visits, clinicians should engage in behaviors that actively foster trust, confidence in the clinician, and collaboration.</li> <li>1.4. Clinicians should provide information that is timely and oriented to the patient's concerns and preferences for information. After providing information, clinicians should check for patient understanding and document important discussions in the medical record.</li> <li>1.5. When patients display emotion through verbal or nonverbal behavior, clinicians should respond empathically.</li> </ol> </li> <li>2. Discussing goals of care and prognosis               <ol style="list-style-type: none"> <li>2.1. Clinicians should provide diagnostic and prognostic information that is tailored to the patient's needs and that provides hope and reassurance without misleading the patient.</li> <li>2.2. Clinicians should reassess a patient's goals, priorities, and desire for information whenever a significant change in the patient's care is being considered.</li> <li>2.3. Clinicians should provide information in simple and direct terms.</li> <li>2.4. When providing bad news, clinicians should take additional steps to address the needs and responses of patients.</li> </ol> </li> <li>3. Discussing treatment options and clinical trials               <ol style="list-style-type: none"> <li>3.1. Before discussing specific treatment options with the patient, clinicians should clarify the goals of treatment (cure v prolongation of survival v improved quality of life) so that the patient understands likely outcomes and can relate the goals of treatment to their goals of care.</li> <li>3.2. When reviewing treatment options with patients, clinicians should provide information about the potential benefits and burdens of any treatment (proportionality) and check the patient's understanding of these benefits and burdens.</li> <li>3.3. Clinicians should discuss treatment options in a way that preserves patient hope, promotes autonomy, and facilitates understanding.</li> <li>3.4. Clinicians should make patients aware of all treatment options, including clinical trials and a sole focus on palliative care. When appropriate, clinicians should discuss the option of initiating palliative care simultaneously with other treatment modalities. If clinical trials are available, clinicians should start treatment discussions with standard treatments available off trial and then move to a discussion of applicable clinical trials if the patient is interested.</li> </ol> </li> <li>4. Discussing end-of-life care               <ol style="list-style-type: none"> <li>4.1. Clinicians should use an organized framework to guide the bidirectional communication about end-of-life care with patients and families.</li> <li>4.2. Clinicians should initiate conversations about patients' end-of-life preferences early in the course of incurable illness and readdress this topic periodically based on clinical events or</li> </ol> </li> </ol> |
|-------------------------------|-----------------------------------------------------------------------------------------------------------------------------------------------------------------------------------------------------------------------------------------------------------------------------------------------------------------------------------------------------------------------------------------------------------------------------------------------------------------------------------------------------------------------------------------------------------------------------------------------------------------------------------------------------------------------------------------------------------------------------------------------------------------------------------------------------------------------------------------------------------------------------------------------------------------------------------------------------------------------------------------------------------------------------------------------------------------------------------------------------------------------------------------------------------------------------------------------------------------------------------------------------------------------------------------------------------------------------------------------------------------------------------------------------------------------------------------------------------------------------------------------------------------------------------------------------------------------------------------------------------------------------------------------------------------------------------------------------------------------------------------------------------------------------------------------------------------------------------------------------------------------------------------------------------------------------------------------------------------------------------------------------------------------------------------------------------------------------------------------------------------------------------------------------------------------------------------------------------------------------------------------------------------------------------------------------------------------------------------------------------------------------------------------------------------------------------------------------------------------------------------------------------------------------------------------------------------------------------------------------------------------------------------------------------------------------------------------------------------------------------------------------------------------------------------------------------------------------------------------------------------------------------------------------------------------------------------------------------------------------------------------------------------------------------------------------------------------------------------------------------------------------------------------------------------------------------------------------------------------------------------------------------------------------------------------------------------------------------------------------------------------------------------------------------------------------------------------------------------------------------------------------------------------------------------------------------------------------------------------------------------------------------------------------------------------------------------------------------------------------------------------------|

1

|                                                                                                                                                                                         |                                                                                                                                                                                                                                                                                                                                                                                                                                                                                                                                                                                                                                                                                                                                                                                                                                                                                                                                                                                                                                                                                                                                                                                                                                                                                                                                                                                                                                                                                                                                                                                                                                                                                                                                                                                                                                                                                                                                                                                                                                                                                                                                                                                                                                                                                                                                                                                                                                                                                                                                                                                                                                                                                                                                                                                                                                                                                                                                                                                                                                                                                                                                                                                                                                                                                                                                                                                                                                    |
|-----------------------------------------------------------------------------------------------------------------------------------------------------------------------------------------|------------------------------------------------------------------------------------------------------------------------------------------------------------------------------------------------------------------------------------------------------------------------------------------------------------------------------------------------------------------------------------------------------------------------------------------------------------------------------------------------------------------------------------------------------------------------------------------------------------------------------------------------------------------------------------------------------------------------------------------------------------------------------------------------------------------------------------------------------------------------------------------------------------------------------------------------------------------------------------------------------------------------------------------------------------------------------------------------------------------------------------------------------------------------------------------------------------------------------------------------------------------------------------------------------------------------------------------------------------------------------------------------------------------------------------------------------------------------------------------------------------------------------------------------------------------------------------------------------------------------------------------------------------------------------------------------------------------------------------------------------------------------------------------------------------------------------------------------------------------------------------------------------------------------------------------------------------------------------------------------------------------------------------------------------------------------------------------------------------------------------------------------------------------------------------------------------------------------------------------------------------------------------------------------------------------------------------------------------------------------------------------------------------------------------------------------------------------------------------------------------------------------------------------------------------------------------------------------------------------------------------------------------------------------------------------------------------------------------------------------------------------------------------------------------------------------------------------------------------------------------------------------------------------------------------------------------------------------------------------------------------------------------------------------------------------------------------------------------------------------------------------------------------------------------------------------------------------------------------------------------------------------------------------------------------------------------------------------------------------------------------------------------------------------------------|
| <p>2<br/>3<br/>4<br/>5<br/>6<br/>7<br/>8<br/>9<br/>10<br/>11<br/>12<br/>13<br/>14<br/>15<br/>16<br/>17<br/>18<br/>19<br/>20<br/>21<br/>22<br/>23<br/>24<br/>25<br/>26<br/>27<br/>28</p> | <p>patient preferences.</p> <p>4.3. Clinicians should explore how a patient's culture, religion, or spiritual belief system affects their end-of-life decision making or care preferences.</p> <p>4.4. Clinicians should recognize and respond empathically to grief and loss among patients, families, and themselves. Clinicians should refer patients and families to psychosocial team members (eg, social workers, counselors, psychologists, psychiatrists, and clergy) when appropriate.</p> <p>4.5. Clinicians should identify and suggest local resources to provide robust support to patients, families, and loved ones transitioning to end-of-life care.</p> <p>5. Using communication to facilitate family involvement in care</p> <p>5.1. Clinicians should suggest family and/or caregiver involvement in discussions (with patient consent) early in the course of the illness for support and discussion about goals of care.</p> <p>5.2. Determine if a formal family meeting in a hospital or outpatient setting is indicated at important junctures in care. When possible, ensure that patients, their designated surrogates, and desired medical professionals are present.</p> <p>6. Communicating effectively when there are barriers to communication</p> <p>6.1. For families who do not share a common language with the clinician, use a medical interpreter rather than a family interpreter.</p> <p>6.2. For patients with low health literacy, focus on the most important points, use plain language, and check frequently for understanding.</p> <p>6.3. For patients with low health numeracy, use pictographs or other visual aids when available, and describe absolute risk rather than relative risk.</p> <p>7. Discussing cost of care</p> <p>7. Clinicians should explore whether cost of care is a concern for patients with cancer.</p> <p>8. Meeting the needs of underserved populations</p> <p>8.1. Enter clinical encounters with a sense of curiosity, aware that any patient and family, regardless of their background, may have beliefs, experiences, understandings, and expectations that are different from the clinician's.</p> <p>8.2. Avoid assumptions about sexual orientation and gender identity and use nonjudgmental language when discussing sexuality and sexual behavior.</p> <p>8.3. Remain aware that members of underserved or marginalized populations have an increased likelihood of having had negative past health care experiences, including feeling disrespected, alienated, or unsafe.</p> <p>9. Clinician training in communication skills</p> <p>9.1. Communication skills training should be based on sound educational principles and include and emphasize skills practice and experiential learning using role-play scenarios, direct observation of patient encounters, and other validated techniques.</p> <p>9.2. For communication skills training to be most effective, it should foster practitioner self-awareness and situational awareness related to emotions, attitudes, and underlying beliefs that may affect communication as well as awareness of implicit biases that may affect decision making.</p> <p>9.3. Facilitators of communication skills training should have sufficient training and experience to effectively model and teach the desired communication skills and facilitate experiential learning exercises.</p> |
|-----------------------------------------------------------------------------------------------------------------------------------------------------------------------------------------|------------------------------------------------------------------------------------------------------------------------------------------------------------------------------------------------------------------------------------------------------------------------------------------------------------------------------------------------------------------------------------------------------------------------------------------------------------------------------------------------------------------------------------------------------------------------------------------------------------------------------------------------------------------------------------------------------------------------------------------------------------------------------------------------------------------------------------------------------------------------------------------------------------------------------------------------------------------------------------------------------------------------------------------------------------------------------------------------------------------------------------------------------------------------------------------------------------------------------------------------------------------------------------------------------------------------------------------------------------------------------------------------------------------------------------------------------------------------------------------------------------------------------------------------------------------------------------------------------------------------------------------------------------------------------------------------------------------------------------------------------------------------------------------------------------------------------------------------------------------------------------------------------------------------------------------------------------------------------------------------------------------------------------------------------------------------------------------------------------------------------------------------------------------------------------------------------------------------------------------------------------------------------------------------------------------------------------------------------------------------------------------------------------------------------------------------------------------------------------------------------------------------------------------------------------------------------------------------------------------------------------------------------------------------------------------------------------------------------------------------------------------------------------------------------------------------------------------------------------------------------------------------------------------------------------------------------------------------------------------------------------------------------------------------------------------------------------------------------------------------------------------------------------------------------------------------------------------------------------------------------------------------------------------------------------------------------------------------------------------------------------------------------------------------------------|

|                                                                                                      |                                                                                                                                                                                                                                                                                                                                                                                                                                                                                                                                                                                                                                                                                                                                                                                                                                                                                                                                                                                                                                                                                                                                                                                                                                                                                                                                                                                                                                                                                                                                                                                                                                                                                                                                                                                                                                                                                                                                                                                                                                                                                                                                                                                                                                                                                                                       |
|------------------------------------------------------------------------------------------------------|-----------------------------------------------------------------------------------------------------------------------------------------------------------------------------------------------------------------------------------------------------------------------------------------------------------------------------------------------------------------------------------------------------------------------------------------------------------------------------------------------------------------------------------------------------------------------------------------------------------------------------------------------------------------------------------------------------------------------------------------------------------------------------------------------------------------------------------------------------------------------------------------------------------------------------------------------------------------------------------------------------------------------------------------------------------------------------------------------------------------------------------------------------------------------------------------------------------------------------------------------------------------------------------------------------------------------------------------------------------------------------------------------------------------------------------------------------------------------------------------------------------------------------------------------------------------------------------------------------------------------------------------------------------------------------------------------------------------------------------------------------------------------------------------------------------------------------------------------------------------------------------------------------------------------------------------------------------------------------------------------------------------------------------------------------------------------------------------------------------------------------------------------------------------------------------------------------------------------------------------------------------------------------------------------------------------------|
| <p>29<br/>30<br/>31<br/>32<br/>33<br/>34<br/>35<br/>36<br/>37<br/>38<br/>39<br/>40<br/>41<br/>42</p> | <p>Hembree et al. (2017)</p> <p><i>1.0 Evaluation of youth and adults</i></p> <p>1.1. We advise that only trained mental health professionals (MHPs) {and/or trained physicians} who meet the following criteria should diagnose gender dysphoria (GD)/gender incongruence in adults: (1) competence in using the Diagnostic and Statistical Manual of Mental Disorders (DSM) and/or the International Statistical Classification of Diseases and Related Health Problems (ICD) for diagnostic purposes, (2) the ability to diagnose GD/gender incongruence and make a distinction between GD/gender incongruence and conditions that have similar features (e.g., body dysmorphic disorder), (3) training in diagnosing psychiatric conditions, (4) the ability to undertake or refer for appropriate treatment, (5) the ability to psychosocially assess the person's understanding, mental health, and social conditions that can impact gender-affirming hormone therapy, and (6) a practice of regularly attending relevant professional meetings.</p> <p>1.2. We advise that only MHPs who meet the following criteria should diagnose GD/gender incongruence in children and adolescents: (1) training in child and adolescent developmental psychology and psychopathology, (2) competence in using the DSM and/or the ICD for diagnostic purposes, (3) the ability to make a distinction between GD/gender incongruence and conditions that have similar features (e.g., body dysmorphic disorder), (4) training in diagnosing psychiatric conditions, (5) the ability to undertake or refer for appropriate treatment, (6) the ability to psychosocially assess the person's understanding and social conditions that can impact gender-affirming hormone therapy, (7) a practice of regularly attending relevant professional meetings, and (8) knowledge of the criteria for puberty blocking and gender-affirming hormone treatment in adolescents.</p> <p>1.3. We advise that decisions regarding the social transition of prepubertal youths with GD/gender incongruence are made with the assistance of an MHP or another experienced professional.</p> <p>1.4. We recommend against puberty blocking and gender-affirming hormone treatment in prepubertal children with GD/gender incongruence.</p> |
|------------------------------------------------------------------------------------------------------|-----------------------------------------------------------------------------------------------------------------------------------------------------------------------------------------------------------------------------------------------------------------------------------------------------------------------------------------------------------------------------------------------------------------------------------------------------------------------------------------------------------------------------------------------------------------------------------------------------------------------------------------------------------------------------------------------------------------------------------------------------------------------------------------------------------------------------------------------------------------------------------------------------------------------------------------------------------------------------------------------------------------------------------------------------------------------------------------------------------------------------------------------------------------------------------------------------------------------------------------------------------------------------------------------------------------------------------------------------------------------------------------------------------------------------------------------------------------------------------------------------------------------------------------------------------------------------------------------------------------------------------------------------------------------------------------------------------------------------------------------------------------------------------------------------------------------------------------------------------------------------------------------------------------------------------------------------------------------------------------------------------------------------------------------------------------------------------------------------------------------------------------------------------------------------------------------------------------------------------------------------------------------------------------------------------------------|

43  
44  
45  
46  
47

1.5. We recommend that clinicians inform and counsel all individuals seeking gender-affirming medical treatment regarding options for fertility preservation prior to initiating puberty suppression in adolescents and prior to treating with hormonal therapy of the affirmed gender in both adolescents and adults.

*2.0 Treatment of adolescents*

2.1. We suggest that adolescents who meet diagnostic criteria for GD/gender incongruence, fulfill criteria for treatment, and are requesting treatment should initially undergo treatment to suppress pubertal development.

2.2. We suggest that clinicians begin pubertal hormone suppression after girls and boys first exhibit physical changes of puberty.

2.3. We recommend that, where indicated, GnRH analogues are used to suppress pubertal hormones.

2.4. In adolescents who request sex hormone treatment (given this is a partly irreversible treatment), we recommend initiating treatment using a gradually increasing dose schedule after a multidisciplinary team of medical and MHPs has confirmed the persistence of GD/gender incongruence and sufficient mental capacity to give informed consent, which most adolescents have by age 16 years.

2.5. We recognize that there may be compelling reasons to initiate sex hormone treatment prior to the age of 16 years in some adolescents with GD/gender incongruence, even though there are minimal published studies of gender-affirming hormone treatments administered before age 13.5 to 14 years. As with the care of adolescents  $\geq 16$  years of age, we recommend that an expert multidisciplinary team of medical and MHPs manage this treatment.

2.6. We suggest monitoring clinical pubertal development every 3 to 6 months and laboratory parameters every 6 to 12 months during sex hormone treatment.

*3.0 Hormonal therapy for transgender adults*

3.1. We recommend that clinicians confirm the diagnostic criteria of GD/gender incongruence and the criteria for the endocrine phase of gender transition before beginning treatment.

3.2. We recommend that clinicians evaluate and address medical conditions that can be exacerbated by hormone depletion and treatment with sex hormones of the affirmed gender before beginning treatment.

3.3. We suggest that clinicians measure hormone levels during treatment to ensure that endogenous sex steroids are suppressed and administered sex steroids are maintained in the normal physiologic range for the affirmed gender.

3.4. We suggest that endocrinologists provide education to transgender individuals undergoing treatment about the onset and time course of physical changes induced by sex hormone treatment.

*4.0 Adverse outcome prevention and long-term care*

4.1. We suggest regular clinical evaluation for physical changes and potential adverse changes in response to sex steroid hormones and laboratory monitoring of sex steroid hormone levels every 3 months during the first year of hormone therapy for transgender males and females and then once or twice yearly.

4.2. We suggest periodically monitoring prolactin levels in transgender females treated with estrogens.

4.3. We suggest that clinicians evaluate transgender persons treated with hormones for cardiovascular risk factors using fasting lipid profiles, diabetes screening, and/or other diagnostic tools.

4.4. We recommend that clinicians obtain bone mineral density (BMD) measurements when risk factors for osteoporosis exist, specifically in those who stop sex hormone therapy after gonadectomy.

4.5. We suggest that transgender females with no known increased risk of breast cancer follow breast-screening guidelines recommended for non-transgender females.

4.6. We suggest that transgender females treated with estrogens follow individualized screening according to personal risk for prostatic disease and prostate cancer.

4.7. We advise that clinicians determine the medical necessity of including a total hysterectomy and oophorectomy as part of gender-affirming surgery.

*5.0 Surgery for sex reassignment and gender confirmation*

5.1. We recommend that a patient pursue genital gender-affirming surgery only after the MHP and the clinician responsible for endocrine transition therapy both agree that surgery is medically necessary and would benefit the patient's overall health and/or well-being.

5.2. We advise that clinicians approve genital gender-affirming surgery only after completion of at least 1 year of consistent and compliant hormone treatment, unless hormone therapy is not desired or medically contraindicated.

5.3. We advise that the clinician responsible for endocrine treatment and the primary care provider ensure appropriate medical clearance of transgender individuals for genital gender-affirming surgery and collaborate with the surgeon regarding hormone use during and after surgery.

5.4. We recommend that clinicians refer hormone-treated transgender individuals for genital surgery when: (1) the individual has had a satisfactory social role change, (2) the individual is satisfied about the hormonal effects, and (3) the individual desires definitive surgical changes.

1  
2  
3  
4  
5  
6  
7  
8  
9  
10  
11  
12  
13  
14  
15  
16  
17  
18  
19  
20  
21  
22  
23  
24  
25  
26  
27  
28  
29  
30  
31  
32  
33  
34  
35  
36  
37  
38  
39  
40  
41  
42  
43  
44  
45  
46  
47

|                |                                                                                                                                                                                                                                                                                                                                                                                                                                                                                                                                                                                                                                                                                                                                                                                                                                                                                                                                                                                                                                                                                                                                                                                                                                                                                                                                                                                                                                                                                                                                                                                                                                                                                                                                                                                                                                                                                                                                                                                                                                                                                                                                                                                                                                                                                                                                                                                                                                                                                                                                                                                                                                                                                                                                                                                                                                                                                                                                                                                                                                                                                                                                                                                                                                                                                                                                                                                                                                                                                                                                                                                                                                                                                                                                                                                                                                                                                                                                                                                                                                                                                                                                                                                                                                                                                                                                                                                                                                                                                                                                                                                                                                                                                                                                                                                                                                                                                                                                                                                                                                      |
|----------------|--------------------------------------------------------------------------------------------------------------------------------------------------------------------------------------------------------------------------------------------------------------------------------------------------------------------------------------------------------------------------------------------------------------------------------------------------------------------------------------------------------------------------------------------------------------------------------------------------------------------------------------------------------------------------------------------------------------------------------------------------------------------------------------------------------------------------------------------------------------------------------------------------------------------------------------------------------------------------------------------------------------------------------------------------------------------------------------------------------------------------------------------------------------------------------------------------------------------------------------------------------------------------------------------------------------------------------------------------------------------------------------------------------------------------------------------------------------------------------------------------------------------------------------------------------------------------------------------------------------------------------------------------------------------------------------------------------------------------------------------------------------------------------------------------------------------------------------------------------------------------------------------------------------------------------------------------------------------------------------------------------------------------------------------------------------------------------------------------------------------------------------------------------------------------------------------------------------------------------------------------------------------------------------------------------------------------------------------------------------------------------------------------------------------------------------------------------------------------------------------------------------------------------------------------------------------------------------------------------------------------------------------------------------------------------------------------------------------------------------------------------------------------------------------------------------------------------------------------------------------------------------------------------------------------------------------------------------------------------------------------------------------------------------------------------------------------------------------------------------------------------------------------------------------------------------------------------------------------------------------------------------------------------------------------------------------------------------------------------------------------------------------------------------------------------------------------------------------------------------------------------------------------------------------------------------------------------------------------------------------------------------------------------------------------------------------------------------------------------------------------------------------------------------------------------------------------------------------------------------------------------------------------------------------------------------------------------------------------------------------------------------------------------------------------------------------------------------------------------------------------------------------------------------------------------------------------------------------------------------------------------------------------------------------------------------------------------------------------------------------------------------------------------------------------------------------------------------------------------------------------------------------------------------------------------------------------------------------------------------------------------------------------------------------------------------------------------------------------------------------------------------------------------------------------------------------------------------------------------------------------------------------------------------------------------------------------------------------------------------------------------------------------------------|
|                | <p>5.5. We suggest that clinicians delay gender-affirming genital surgery involving gonadectomy and/or hysterectomy until the patient is at least 18 years old or legal age of majority in his or her country.</p> <p>5.6. We suggest that clinicians determine the timing of breast surgery for transgender males based upon the physical and mental health status of the individual. There is insufficient evidence to recommend a specific age requirement.</p>                                                                                                                                                                                                                                                                                                                                                                                                                                                                                                                                                                                                                                                                                                                                                                                                                                                                                                                                                                                                                                                                                                                                                                                                                                                                                                                                                                                                                                                                                                                                                                                                                                                                                                                                                                                                                                                                                                                                                                                                                                                                                                                                                                                                                                                                                                                                                                                                                                                                                                                                                                                                                                                                                                                                                                                                                                                                                                                                                                                                                                                                                                                                                                                                                                                                                                                                                                                                                                                                                                                                                                                                                                                                                                                                                                                                                                                                                                                                                                                                                                                                                                                                                                                                                                                                                                                                                                                                                                                                                                                                                                   |
| IAPHCCO (2015) | <p><i>Optimizing the HIV care environment</i></p> <ol style="list-style-type: none"> <li>1. Laws that criminalize the conduct of or exert punitive legal measures against MSM, transgender individuals, substance users, and sex workers are not recommended and should be repealed where they have been enacted.</li> <li>2. Laws that criminalize the conduct of PLHIV based on perceived exposure to HIV, and without any evidence of intent to do harm, are not recommended and should be repealed where they have been enacted.</li> <li>3. HIV-related restrictions on entry, stay, and residence in any country for PLHIV are not recommended and should be repealed where they have been enacted.</li> <li>4. Strategies to monitor for and eliminate stigma and discrimination based on race, ethnicity, gender, age, sexual orientation, and/or behavior in all settings, but particularly in health care settings, using standardized measures and evidence-based approaches, are recommended.</li> <li>5. Proactive steps are recommended to identify and manage clinical mental health disorders (eg, anxiety, depression, and traumatic stress) and/or mental health issues related to HIV diagnosis, disclosure of HIV status, and/or HIV treatment.</li> <li>6. Enabling PLHIV to take responsibility for their care (eg, self-management, user-driven care) is recommended.</li> <li>7. Shifting and sharing HIV testing, dispensing of ART, and other appropriate tasks among professional and paraprofessional health worker cadres is recommended.</li> <li>7a. Use of lay health workers to provide pretest education and testing and to enhance PLHIV engagement in HIV care is recommended.</li> <li>7b. Task shifting/sharing from physicians to appropriately trained health care providers, including nurses and associate clinicians, is recommended for ART initiation and maintenance.</li> <li>8. Community engagement in every step across the HIV care continuum is recommended.</li> </ol> <p><i>Increasing HIV testing coverage and linkage to care</i></p> <ol style="list-style-type: none"> <li>9. Routinely offering opt-out HIV testing to all individuals who present at health facilities is recommended.</li> <li>10. Community-based HIV testing is recommended to reach those who are less likely to attend facility-based HIV testing.</li> <li>11. Confidential, voluntary HIV testing in large workplace and institutional settings (military, police, mining/trucking companies, and educational venues) should be considered. (B III) 12.</li> <li>HIV self-testing is recommended with the provision of guidance about the proper method for administering the test and direction on what to do once the results have been obtained.</li> <li>13. Use of epidemiological data and network analyses to identify individuals at risk of HIV infection for HIV testing is recommended.</li> <li>14. The offer of HIV testing to partners of newly diagnosed individuals is recommended.</li> <li>15. Immediate referral to HIV care is recommended following an HIV-positive diagnosis to improve linkage to ART.</li> <li>16. For high-risk individuals who test HIV negative, offering PrEP is recommended in addition to the provision of free condoms, education about risk reduction strategies, PEP, and voluntary medical male circumcision.</li> <li>17. Use of case managers and patient navigators to increase linkage to care is recommended.</li> </ol> <p><i>Increasing HIV treatment coverage</i></p> <ol style="list-style-type: none"> <li>18. The immediate offer of ART after HIV diagnosis, irrespective of CD4 count or clinical stage, is recommended.</li> <li>19. First-line ARV regimens with the highest levels of efficacy, lowest adverse event profiles, and delivered in QD fixed-dose combinations are recommended.</li> <li>20. Viral load testing at least every 6 months is recommended as the preferred tool for monitoring ART response.</li> <li>21. HIV drug resistance testing is recommended at entry into care or prior to ART initiation and when virologic failure is confirmed.</li> <li>21a. Where routine access to HIV drug resistance testing is restricted, population-based surveillance is recommended.</li> <li>22. Community-located ART distribution is recommended.</li> <li>22a. The use of community-based pharmacies should be considered.</li> </ol> <p><i>Increasing retention in care, ART adherence, and viral suppression</i></p> <ol style="list-style-type: none"> <li>23. Systematic monitoring of retention in HIV care is recommended for all patients.</li> <li>23a. Retention in HIV care should be considered as a quality indicator.</li> <li>23b. Measuring retention in HIV care using electronic health record and other health system data is recommended.</li> <li>23c. Use of clinic databases/surveillance systems for HIV clinical monitoring and population-level tracking is recommended.</li> </ol> |

1

2

3

4

5

6

7

8

9

10

11

12

13

14

15

16

17

18

19

20

21

22

23

24

25

26

27

28

29

30

31

32

33

34

35

36

37

38

39

40

41

42

43

44

45

46

47

|                            |                                                                                                                                                                                                                                                                                                                                                                                                                                                                                                                                                                                                                                                                                                                                                                                                                                                                                                                                                                                                                                                                                                                                                                                                                                                                                                                                                                                                                                                                                                                                                                                                                                                                                                                                                                                                                                                                                                                                                                                                                                                                                                                                                                                                                                                                                                                                                                                                                                                                                                                                                                                                                                                                                                                                                                                                                                                                                                                                                                                                                                                                                                                                                                    |
|----------------------------|--------------------------------------------------------------------------------------------------------------------------------------------------------------------------------------------------------------------------------------------------------------------------------------------------------------------------------------------------------------------------------------------------------------------------------------------------------------------------------------------------------------------------------------------------------------------------------------------------------------------------------------------------------------------------------------------------------------------------------------------------------------------------------------------------------------------------------------------------------------------------------------------------------------------------------------------------------------------------------------------------------------------------------------------------------------------------------------------------------------------------------------------------------------------------------------------------------------------------------------------------------------------------------------------------------------------------------------------------------------------------------------------------------------------------------------------------------------------------------------------------------------------------------------------------------------------------------------------------------------------------------------------------------------------------------------------------------------------------------------------------------------------------------------------------------------------------------------------------------------------------------------------------------------------------------------------------------------------------------------------------------------------------------------------------------------------------------------------------------------------------------------------------------------------------------------------------------------------------------------------------------------------------------------------------------------------------------------------------------------------------------------------------------------------------------------------------------------------------------------------------------------------------------------------------------------------------------------------------------------------------------------------------------------------------------------------------------------------------------------------------------------------------------------------------------------------------------------------------------------------------------------------------------------------------------------------------------------------------------------------------------------------------------------------------------------------------------------------------------------------------------------------------------------------|
|                            | <p>24. Routine ART adherence monitoring is recommended in all patients.</p> <p>24a. Viral suppression is recommended as the primary adherence monitoring metric.</p> <p>24b. Routine collection of self-reported adherence data from patients is recommended.</p> <p>24c. Pharmacy refill data are recommended for adherence monitoring.</p> <p>25. Information and communication technologies aimed at supporting patient self-care are recommended.</p> <p>25a. Mobile health technology using weekly interactive components (eg, 2-way SMS) is recommended.</p> <p>25b. Alarm devices are recommended as reminders for PLHIV with memory impairment.</p> <p>26. Patient education about and offering support for medication adherence and keeping clinic appointments are recommended.</p> <p>26a. Pillbox organizers are recommended, particularly for HIV-infected adults with lifestyle-related barriers to adherence.</p> <p>27. Neither directly administered nor directly observed ART is recommended for routine clinical care settings.</p> <p>27a. Directly administered ART is recommended for people who inject drugs and released prisoners at high risk of ART non adherence.</p> <p>28. Proactive engagement and reengagement of patients who miss clinic appointments and/or are lost to follow-up, including intensive outreach for those not engaged in care within 1 month of a new HIV diagnosis, is recommended.</p> <p>28a. Case management to retain PLHIV in care and to locate and reengage patients lost to follow-up is recommended. (B II) 28b. Transportation support for PLHIV to attend their clinic visits is recommended.</p> <p><i>Adolescents</i></p> <p>29. Removing adult-assisted consent to HIV testing and counseling is recommended for minor adolescents with the capacity to consent. (B II) 30. Adolescent-centered services are recommended in both clinical and community-based settings.</p> <p>31. Informing an adolescent of his/her HIV-positive diagnosis is recommended as soon after diagnosis as feasible. (B II) 32. A transition plan between pediatric and adult HIV care is recommended.</p> <p><i>Metrics for and monitoring of the HIV care continuum</i></p> <p>33. A standardized method should be used to estimate the total number of PLHIV (diagnosed and undiagnosed) within a geographic setting.</p> <p>34. The estimated number of PLHIV in the geographic setting should be the overall denominator for the HIV care continuum.</p> <p>35. Collection of a minimum set of 5 data elements should be considered to populate the HIV care continuum. Estimated number of PLHIV □ Number and proportion of PLHIV who are diagnosed as having HIV □ Number and proportion of PLHIV who are linked to care (optional) □ Number and proportion of PLHIV on ART □ Number and proportion of PLHIV on ART who are virally suppressed</p> <p>36. Where possible, jurisdictions should consider longitudinal cohort measurement of HIV service utilization and treatment outcomes to identify the means to maximize viral suppression through ensuring early access to ART and retention in care.</p> |
| <p>Ralph et al. (2010)</p> | <p><i>Recommendation for Penile Fracture</i></p> <p>Imaging (cavernosography, US, or MRI) can be used for localization of the injury, while retrograde urethrogram (pre-/perioperative) can be performed if there is a suspicion of a urethral injury. The ultimate decision for surgery is based on clinical findings and once diagnosed, there is no indication for conservative management.</p> <p><i>Recommendation for Skin Loss Injuries</i></p> <p>There is evidence to support surgical replacement of shaft skin with either split, mesh, or full thickness skin.</p> <p><i>Recommendation for Penile Amputation</i></p> <p>Critical warm and cold ischemia time is unknown. Surgical reattachment is therefore a clinical decision and is best performed by an experienced microsurgeon. Psychological evaluation should be offered to patients who self-mutilate. If re-implantation fails or is impossible, patients should be referred for phalloplasty at an appropriate time interval.</p> <p><i>Definition of Gender Identity Disorder/ Transsexualism</i></p> <p>The desire for at least 2 years, to live and be accepted as a member of the opposite sex, usually accompanied by the wish to make his or her body as congruent as possible with the preferred sex through surgery and hormone therapy.</p> <p><i>Male-to-Female Genital Surgery</i></p> <p>Bilateral orchiectomy, amputation of the corpora cavernosa, creation of a neovaginal cavity that is lined by hairless skin, the formation of a sensate neoclitoris, and an aesthetic vulval appearance are the aims of genital surgery. The outcome may be achieved in one or two stages with satisfaction rates of 80% expected.</p> <p><i>Female-to-Male Genital Surgery</i></p>                                                                                                                                                                                                                                                                                                                                                                                                                                                                                                                                                                                                                                                                                                                                                                                                                                                                                                                                                                                                                                                                                                                                                                                                                                                                                                                                                                                                    |



1

Breast reduction, oophorectomy, hysterectomy, and vaginectomy should be offered to all patients. There are many phalloplasty techniques involving local or free flaps and microsurgery. Patients should be warned that multiple stages are often needed with high urethral and prosthetic complication rates. However, a universal satisfaction rate of 80% should be expected. Metoidioplasty can be offered to those who wish to stand to void but do not want sexual intercourse.

*Penile Augmentation – Indications*

A stretched penile length of <7cm should be considered as a micropenis with many surgical techniques being recommended. The indications for augmentation in men with a normal-sized penis cannot be drawn from the literature

*Penile Augmentation – Surgical Techniques*

There are many lengthening techniques described with variable success rates. The complications may be significant. Stretching devices may be an alternative treatment option. All operative methods of girth enhancement have no proven efficacy outcome data. Liquid silicone injection should be discouraged. Psychological assessment should proceed any surgical approach

Strang et al. (2016)

*Emergency intakes:*

If the adolescent presents in a state of emergency, as some gender dysphoria (GD) referrals do, then as in any assessment, the first priority is risk reduction/safety. Hospitalization may be necessary in extreme cases to prevent self-harm/mutilation, though psychiatric hospital units are often not equipped to work with gender dysphoric adolescents with autism spectrum disorders (ASD), and so outside consultation to the unit may be necessary. Ultimately, engaging a therapist with training (or consultation support) in both ASD and gender nonconformity/GD may be a critical step; helping a patient understand that relief is coming and that their gender-needs will be addressed may reduce safety risks, and support further assessment.

*ASD assessment:*

When an ASD diagnosis is suspected, it is important for an autism specialist to confirm the diagnosis, if a diagnosis has not been established. Whenever possible, a neuropsychological/autism evaluation should be conducted to evaluate the impact of ASD on an adolescent’s ability to understand and report GD symptoms as well as engage in therapy/treatments. Evaluations should include assessment of general cognitive skills, executive function skills (impulse control, flexibility, planning, future thinking), communication skills, emotional functioning, self-awareness/social cognition, and capacity for self-advocacy. Knowledge of the young person’s capacities will inform the GD diagnosis process (i.e., how to best obtain clinical/diagnostic information and understand that information), as well as deciding on clinical treatment options (i.e., the ability to understand treatments, comply with treatments, consider a range of gender possibilities vs. concrete/black-and-white thinking).

*Gender-related assessment:*

When gender issues are reported/suspected in an adolescent with ASD, a structured interview should be used to assess for gender dysphoria, including dysphoria over time, intensity of dysphoria, and its pervasiveness. Whenever possible, it is important to obtain additional report from other sources (e.g., parents), as communication, self-awareness, and self-advocacy skills may be vulnerable in adolescents with ASD. It is difficult to separate the assessment and treatment of many of these individuals, because assessment continues throughout the treatment process as the person may develop increased understanding of themselves and increased ability to express their wants and needs. Therefore, gender-related diagnostics may take more time. For some individuals, however, GD diagnosis is immediately clear, such as when the dysphoria has been present for an extended period, the young person is already presenting as a different gender, or when the level of urgency about gender transition is extreme.

*Treatment checklist (psychosocial and medical).*

Establish appropriate clinical team, ideally a clinician trained in both autism spectrum disorders (ASD) and gender nonconformity/ gender dysphoria (GNC/GD), or clinicians collaborating from each specialty. □

Address and assess intensity of gender feelings/urgency throughout the treatment process, as assessment often continues during treatment, informing and shaping the goals of the treatment. Key clinical questions:

- a. Is the GD clear, urgent, pervasive, and persistent over time (i.e., meeting full diagnostic criteria for GD)? If yes, consultation with medical transition services may be indicated (see “If medical transition is indicated” below).
- b. Does the GD increase or decrease with intervention (e.g., as adolescent develops increased social/self-awareness, executive function flexibility and big picture thinking skills, communication/self-advocacy skills)? □

Provide psycho-education about and explore the possibility of a range of gender outcomes (e.g., gender spectrum, incorporating aspects of a different gender without full gender transition, etc.) This may require specific approaches targeting ASD related deficits in cognitive flexibility (i.e., reducing all or nothing/black and white thinking). □

Provide structure, as necessary, for gender exploration, supporting the adolescent’s ability to explore gender transition, including clothing, name, pronouns, etc. Parents may need to assume a central role in helping facilitate an individual’s exploration of their gender when ASD-related weaknesses in daily living skills, planning and self-advocacy interfere with that

43  
44  
45  
46  
47

|                                                                                                                                                                                  |                       |                                                                                                                                                                                                                                                                                                                                                                                                                                                                                                                                                                                                                                                                                                                                                                                                                                                                                                                                                                                                                                                                                                                                                                                                                                                                                                                                                                                                                                                                                                                                                                                                                                                                                                                                                                                                                                                                                                                                                                                                                                                                                                                                                                                                                                                                                                                                                                                                                                                                                                                                                                                                                                                                                                                                                                                                                                                                                                                                                                                                                                                                                                                                                                                                                                                                                                                                                                                                                                                                                                                                                                                                                                                                                                                                                                                                                                                                                                                                                                                                                                                                                                                                                                                                                                                                                                                                                                                                                                                                                                                                                                                                                                                                                                                                                                                                                                                                  |
|----------------------------------------------------------------------------------------------------------------------------------------------------------------------------------|-----------------------|------------------------------------------------------------------------------------------------------------------------------------------------------------------------------------------------------------------------------------------------------------------------------------------------------------------------------------------------------------------------------------------------------------------------------------------------------------------------------------------------------------------------------------------------------------------------------------------------------------------------------------------------------------------------------------------------------------------------------------------------------------------------------------------------------------------------------------------------------------------------------------------------------------------------------------------------------------------------------------------------------------------------------------------------------------------------------------------------------------------------------------------------------------------------------------------------------------------------------------------------------------------------------------------------------------------------------------------------------------------------------------------------------------------------------------------------------------------------------------------------------------------------------------------------------------------------------------------------------------------------------------------------------------------------------------------------------------------------------------------------------------------------------------------------------------------------------------------------------------------------------------------------------------------------------------------------------------------------------------------------------------------------------------------------------------------------------------------------------------------------------------------------------------------------------------------------------------------------------------------------------------------------------------------------------------------------------------------------------------------------------------------------------------------------------------------------------------------------------------------------------------------------------------------------------------------------------------------------------------------------------------------------------------------------------------------------------------------------------------------------------------------------------------------------------------------------------------------------------------------------------------------------------------------------------------------------------------------------------------------------------------------------------------------------------------------------------------------------------------------------------------------------------------------------------------------------------------------------------------------------------------------------------------------------------------------------------------------------------------------------------------------------------------------------------------------------------------------------------------------------------------------------------------------------------------------------------------------------------------------------------------------------------------------------------------------------------------------------------------------------------------------------------------------------------------------------------------------------------------------------------------------------------------------------------------------------------------------------------------------------------------------------------------------------------------------------------------------------------------------------------------------------------------------------------------------------------------------------------------------------------------------------------------------------------------------------------------------------------------------------------------------------------------------------------------------------------------------------------------------------------------------------------------------------------------------------------------------------------------------------------------------------------------------------------------------------------------------------------------------------------------------------------------------------------------------------------------------------------------------|
| 1<br>2<br>3<br>4<br>5<br>6<br>7<br>8<br>9<br>10<br>11<br>12                                                                                                                      |                       | <p>exploration. Such family support may include reminding a young person of their gender exploration therapy goals during the week, helping a young person to obtain appropriate clothing to try on, and so forth. □</p> <p>Over the course of treatment, assess for signs that the adolescent's experience of GNC/GD is caused by comorbidities or symptoms of ASD (e.g., ASD preoccupations, misinterpreting sexual orientation for gender, etc.) If it becomes clear that a wish to transition is caused by a comorbidity or symptoms of ASD, explore alternative solutions to gender transition. □</p> <p>If medical transition is indicated during the process, ensure that a pediatric endocrinologist (or similar medical specialist) trained in GD is engaged in the treatment to discuss risks/benefits of pubertal blockade and/or cross sex hormones. The endocrinologist/medical specialist and other treatment providers (e.g., autism specialist) should collaborate around diagnostics and treatments. If medical treatments begin, provide concrete psycho-education about treatment side effects, risks and benefits and ensure that these issues are understood by the adolescent with concurrent GD and ASD. □</p> <p>Consider the accessibility and appropriateness of adjunct gender and/or ASD-related supports/services. Provide support, coaching, and vetting as needed. For example, an LGBT youth group leader may require some coaching in how to welcome and engage a person with ASD, and an autism skills group provider may require support in how to work with a GD/gender nonconforming adolescent.</p>                                                                                                                                                                                                                                                                                                                                                                                                                                                                                                                                                                                                                                                                                                                                                                                                                                                                                                                                                                                                                                                                                                                                                                                                                                                                                                                                                                                                                                                                                                                                                                                                                                                                                                                                                                                                                                                                                                                                                                                                                                                                                                                                                                                                                                                                                                                                                                                                                                                                                                                                                                                                                                                                                                                                                                                                                                                                                                                                                                                                                                                                                                                                                                                                                        |
| 13<br>14<br>15<br>16<br>17<br>18<br>19<br>20<br>21<br>22<br>23<br>24<br>25<br>26<br>27<br>28<br>29<br>30<br>31<br>32<br>33<br>34<br>35<br>36<br>37<br>38<br>39<br>40<br>41<br>42 | T'Sjoen et al. (2020) | <ol style="list-style-type: none"> <li>1. We advise that HCPs when working with trans people recognize the diversity of genders, including male, female, and nonbinary individuals.</li> <li>2. We advise that HCPs when working with trans people openly ask for the individual gender experience of the person seeking treatment, including which pronouns and name they like to be addressed with, and recognize this may change in the future.</li> <li>3. We advise that HCPs when working with trans people critically reflect upon discriminatory factors influencing both access to and outcomes of gender-related health-care services and make the necessary changes to accommodate all trans individuals.</li> <li>4. We advise that HCPs when working with trans people should critically reflect on their own possible prejudices, ethics, and power positions.</li> <li>5. We advise that HCPs when working with adult trans people should explain the result of the clinical assessment with the aim of a shared understanding and shared responsibility.</li> <li>6. We advise that HCPs assessing gender diverse children and adolescents support the exploration and expression of the youth's experienced gender and help to reduce experienced barriers for those seeking care.</li> <li>7. We advise that HCPs assessing gender diverse children and adolescents take a developmental approach that includes that gender-related developmental pathways may be more open to change in prepubescent gender diverse children than in pubescent gender diverse adolescents and adults.</li> <li>8. We advise that HCPs assessing gender diverse children and adolescents assess resilience and vulnerabilities and treat (or refer for treatment) possible mental health problems.</li> <li>9. We advise that HCPs assessing gender diverse children and adolescents support parents and/or legal guardian and school and other important social networks (when possible) to provide a safe and accepting home and school environment.</li> <li>10. For prepubescent gender diverse children who desire to live in a role consistent with their experienced gender identity, we advise the HCPs advise that parents and the social environment consider social transitioning of the child after discussing the pros and the cons and while providing continuous psychological support.</li> <li>11. For pubertal gender diverse adolescents, we advise that HCPs inform and explore all nonmedical and medical options, including the effect that GAMIs (puberty blockers, hormones as well as surgical) may have on sexuality and fertility and if indicated, facilitate GAMIs.</li> <li>12. In countries requiring an assessment process including a clinical diagnosis to access GAMI, we advise that HCPs assessing trans adolescents for GAMI have the expertise in reaching the required diagnosis for their health service</li> <li>13. We advise that HCPs working with trans people should inform trans adults seeking GAMI of its effect and assess the capacity of the individual to reach an informed consent regarding GAMI.</li> <li>14. We advise that, in view of the strong evidence regarding the high levels of mental health problems in adults presenting at trans health services, particularly in those not on hormone treatment, HCPs whose role is informing and assessing the capacity to consent for GAMI in trans people wishing these interventions should have expertise in mental health to be able to identify those requiring further support from mental health professionals to allow for the best possible outcome of GAMI.</li> <li>15. We advise that HCPs whose role is informing and assessing the capacity to consent for GAMI in trans people wishing these interventions should explore resilience and social support, in view of its association with health-related quality of life and psychological well-being.</li> <li>16. We advise that HCPs whose role is informing and assessing the capacity to consent for GAMI in trans people wishing these interventions should inform clients about the effect that GAMIs (hormones and surgical) may have on sexual health and fertility.</li> <li>17. In countries requiring an assessment process including a clinical diagnosis to access GAMI, we advise that HCPs assessing trans adults for GAMI have the expertise in reaching the required diagnosis for their health service.</li> <li>18. We advise initiating pubertal hormone suppression in trans adolescents, when gender incongruence or nonconformity is assessed, interfering psychosocial difficulties are addressed if possible, and after they show their first pubertal changes (Tanner stage G2) and when they have sufficient capacity to give informed consent.</li> </ol> |

1

|    |  |                                                                                                                                                                                                                                                                                                                                         |
|----|--|-----------------------------------------------------------------------------------------------------------------------------------------------------------------------------------------------------------------------------------------------------------------------------------------------------------------------------------------|
| 2  |  | 19. We advise in adolescents desiring masculinizing hormone treatment, when they have sufficient capacity to give informed consent, puberty induction with testosterone, often using a gradually increasing dose schedule.                                                                                                              |
| 3  |  |                                                                                                                                                                                                                                                                                                                                         |
| 4  |  | 20. We advise that before initiation of gonadotropin-releasing hormone analogs (GnRHa) or progestogen and/or testosterone, the hormone-prescribing physician should screen for conditions that may worsen with the start of treatment.                                                                                                  |
| 5  |  |                                                                                                                                                                                                                                                                                                                                         |
| 6  |  | 21. If masculinization is desired, we advise testosterone therapy with monitoring of serum sex steroid levels and signs of virilization.                                                                                                                                                                                                |
| 7  |  | 22. We advise the hormone-prescribing physician discusses the effects and possible adverse health effects of GnRHa, progestogen, and/or testosterone treatment, including fertility preservation options, based on the person's goals before any hormonal intervention.                                                                 |
| 8  |  |                                                                                                                                                                                                                                                                                                                                         |
| 9  |  | 23. We advise informing trans subjects on the expected changes upon GnRHa, progestogen, and/or testosterone initiation on its effect on body satisfaction and on sexual function (desire and activity) and considering the role that factors such as relationship status and possible surgical interventions will play.                 |
| 10 |  |                                                                                                                                                                                                                                                                                                                                         |
| 11 |  | 24. We advise initiating pubertal hormone suppression in trans adolescents, when gender incongruence or nonconformity is assessed, interfering psychosocial difficulties are addressed if possible, and after they show their first pubertal changes (Tanner stage G2) and when they have sufficient capacity to give informed consent. |
| 12 |  |                                                                                                                                                                                                                                                                                                                                         |
| 13 |  | 25. We advise in adolescents desiring feminizing hormone treatment, when they have sufficient capacity to give informed consent, puberty induction with 17beta-estradiol, often using a gradually increasing dose schedule.                                                                                                             |
| 14 |  |                                                                                                                                                                                                                                                                                                                                         |
| 15 |  | 26. We advise that before initiation of GnRHa or antiandrogen and/or estrogen treatment, the hormone-prescribing physician needs to screen for conditions that may worsen with the start of treatment.                                                                                                                                  |
| 16 |  |                                                                                                                                                                                                                                                                                                                                         |
| 17 |  | 27. If feminization is desired, we advise estrogens and/or antiandrogen therapy with monitoring of serum sex steroid levels and signs of feminization.                                                                                                                                                                                  |
| 18 |  | 28. We advise the hormone-prescribing physician discusses the effects and possible adverse health effects of GnRHa, antiandrogen, and/or estrogen treatment, including fertility preservation options and consequences for genital surgery, based on the person's goals before any hormonal intervention.                               |
| 19 |  | 29. We advise informing trans clients on the expected changes upon GnRHa, estrogen, and/or anti-androgen initiation and its effect on body satisfaction, sexual desire and activity and considering the role factors such as relationship status and possible surgical interventions can play                                           |
| 20 |  |                                                                                                                                                                                                                                                                                                                                         |
| 21 |  | 30. We advise HCPs should be aware of potential sexual problems during all surgical phases of treatment.                                                                                                                                                                                                                                |
| 22 |  | 31. We advise that regardless of surgical pathways, HCPs should be aware of diversity in sexual practices in trans people.                                                                                                                                                                                                              |
| 23 |  | 32. We advise that surgeons performing GAS collaborate with sexologists with knowledge and experience with trans people, if available.                                                                                                                                                                                                  |

|    |        |                                                                                                                                                                                                                                                                                                                                           |
|----|--------|-------------------------------------------------------------------------------------------------------------------------------------------------------------------------------------------------------------------------------------------------------------------------------------------------------------------------------------------|
| 24 | WHO    | <i>Recommendations on human rights and non-discrimination in health-care settings</i>                                                                                                                                                                                                                                                     |
| 25 | (2011) | 1. Legislators and other government authorities should establish antidiscrimination and protective laws, derived from international human rights standards, in order to eliminate discrimination and violence faced by MSM and transgender people, and reduce their vulnerability to infection with HIV, and the impacts of HIV and AIDS. |
| 26 |        | 2. Health services should be made inclusive of MSM and transgender people, based on the principles of medical ethics and the right to health.                                                                                                                                                                                             |
| 27 |        | <i>Recommendations on HIV prevention, care and treatment</i>                                                                                                                                                                                                                                                                              |
| 28 |        | <i>Prevention of sexual transmission</i>                                                                                                                                                                                                                                                                                                  |
| 29 |        |                                                                                                                                                                                                                                                                                                                                           |
| 30 |        | 3. Using condoms consistently during anal intercourse is strongly recommended for MSM and transgender people over not using condoms.                                                                                                                                                                                                      |
| 31 |        | 4. Using condoms consistently is strongly recommended over serosorting for HIV-negative MSM and transgender people. Serosorting is suggested over not using condoms by HIV-negative MSM and transgender people under specific circumstances as a harm reduction strategy.                                                                 |
| 32 |        | 5. Not offering adult male circumcision to MSM and transgender people for the prevention of HIV and STI is suggested over offering it                                                                                                                                                                                                     |
| 33 |        | 6. Offering HIV testing and counselling to MSM and transgender people is strongly recommended over not offering this intervention                                                                                                                                                                                                         |
| 34 |        | 7. Offering community-based HIV testing and counselling linked to care and treatment to MSM and transgender people is strongly recommended over not offering such programmes                                                                                                                                                              |
| 35 |        | <i>Behavioural interventions, information, education, communication</i>                                                                                                                                                                                                                                                                   |
| 36 |        | 8. Implementing individual-level behavioural interventions for the prevention of HIV and STIs among MSM and transgender people is suggested over not implementing such interventions.                                                                                                                                                     |
| 37 |        |                                                                                                                                                                                                                                                                                                                                           |
| 38 |        | 9. Implementing community-level behavioural interventions for the prevention of HIV and STIs among MSM and transgender people is suggested over not implementing such interventions.                                                                                                                                                      |
| 39 |        |                                                                                                                                                                                                                                                                                                                                           |
| 40 |        | 10. Offering targeted internet-based information to decrease risky sexual behaviours and increase uptake of HIV testing and counselling among MSM and transgender people is suggested over not offering such information.                                                                                                                 |
| 41 |        |                                                                                                                                                                                                                                                                                                                                           |
| 42 |        | 11. Using social marketing strategies to increase the uptake of HIV/STI testing and counselling and HIV services among MSM and transgender people is suggested over not using such                                                                                                                                                        |

43

44

45

46

47

1

2

3

4

5

6

7

8

9

10

11

12

13

14

15

16

17

18

19

20

21

22

23

24

25

26

27

28

29

30

31

32

33

34

35

36

37

38

39

40

41

42

43

44

45

46

47

|    |                                                                                                                                                                                                                                                                                                                                                                                                                                                                                                                                                                                                                                                                                                                                                                                                                                                                                                                                                                                                                                                                                                                                                                                                                                                                                                                                                                                                                                                                                                                                                                                                                                                                                                                                                                                                                                                                                                                                                                                                                                                                                                                                                                                                                                                                                                                                                                                                                                                                                                                                                                                                    |
|----|----------------------------------------------------------------------------------------------------------------------------------------------------------------------------------------------------------------------------------------------------------------------------------------------------------------------------------------------------------------------------------------------------------------------------------------------------------------------------------------------------------------------------------------------------------------------------------------------------------------------------------------------------------------------------------------------------------------------------------------------------------------------------------------------------------------------------------------------------------------------------------------------------------------------------------------------------------------------------------------------------------------------------------------------------------------------------------------------------------------------------------------------------------------------------------------------------------------------------------------------------------------------------------------------------------------------------------------------------------------------------------------------------------------------------------------------------------------------------------------------------------------------------------------------------------------------------------------------------------------------------------------------------------------------------------------------------------------------------------------------------------------------------------------------------------------------------------------------------------------------------------------------------------------------------------------------------------------------------------------------------------------------------------------------------------------------------------------------------------------------------------------------------------------------------------------------------------------------------------------------------------------------------------------------------------------------------------------------------------------------------------------------------------------------------------------------------------------------------------------------------------------------------------------------------------------------------------------------------|
|    | <p>strategies.</p> <p>12. Implementing sex venue-based outreach strategies to decrease risky sexual behaviour and increase uptake of HIV testing and counselling among MSM and transgender people is suggested over not implementing such strategies.</p> <p>Substance use and prevention of bloodborne infections</p> <p>13. MSM and transgender people with harmful alcohol or other substance use should have access to evidence-based brief psychosocial interventions involving assessment, specific feedback and advice.</p> <p>14. MSM and transgender people who inject drugs should have access to needle and syringe programmes and opioid substitution therapy.</p> <p>15. Transgender people who inject substances for gender enhancement should use sterile injecting equipment and practise safe injecting behaviours to reduce the risk of infection with bloodborne pathogens such as HIV, hepatitis B and hepatitis C.</p> <p><i>HIV care and treatment</i></p> <p>16. MSM and transgender people living with HIV should have the same access to ART as other populations. ART should be initiated at CD4 counts of <math>\leq 350</math> cells/mm<sup>3</sup> (and for those in WHO clinical stage 3 or 4 if CD4 testing is not available). Access should also include management of opportunistic infections, co-morbidities and treatment failure.</p> <p>17. MSM and transgender people living with HIV should have access to essential interventions to prevent illness and HIV transmission including, but not limited to, care and support and antiretroviral therapy.</p> <p><i>Recommendations on prevention and care of other sexually transmitted infections</i></p> <p>18. MSM and transgender people with symptomatic STIs should seek and be offered syndromic management and treatment.</p> <p>19. Offering periodic testing for asymptomatic urethral and rectal <i>N. gonorrhoeae</i> and <i>C. trachomatis</i> infections using NAAT is suggested over not offering such testing for MSM and transgender people. Not offering periodic testing for asymptomatic urethral and rectal <i>N. gonorrhoeae</i> infections using culture is suggested over offering such testing for MSM and transgender people.</p> <p>20. Offering periodic serological testing for asymptomatic syphilis infection to MSM and transgender people is strongly recommended over not offering such screening</p> <p>21. MSM and transgender people should be included in catch-up HBV immunization strategies in settings where infant immunization has not reached full coverage</p> |
| 22 | <p>WHO (2012)</p> <p>1: In countries where HIV transmission occurs among serodiscordant couples, where discordant couples can be identified and where additional HIV prevention choices for them are needed, daily oral PrEP (specifically tenofovir or the combination of tenofovir and emtricitabine) may be considered as a possible additional intervention for the uninfected partner.</p> <p>2: In countries where HIV transmission occurs among men and transgender women who have sex with men and additional HIV prevention choices for them are needed, daily oral PrEP (specifically the combination of tenofovir and emtricitabine) may be considered as a possible additional intervention.</p>                                                                                                                                                                                                                                                                                                                                                                                                                                                                                                                                                                                                                                                                                                                                                                                                                                                                                                                                                                                                                                                                                                                                                                                                                                                                                                                                                                                                                                                                                                                                                                                                                                                                                                                                                                                                                                                                                       |
| 26 | <p>WHO (2016)</p> <p><i>HIV prevention</i></p> <p>1 The correct and consistent use of condoms with condom-compatible lubricants is recommended for all key populations to prevent sexual transmission of HIV and sexually transmitted infections (STIs).</p> <p>2 Oral pre-exposure prophylaxis (PrEP) containing tenofovir disoproxil fumarate (TDF) should be offered as an additional prevention choice for key populations at substantial risk of HIV infection as part of combination HIV prevention approaches.</p> <p>3 Post-exposure prophylaxis (PEP) should be available to all eligible people from key populations on a voluntary basis after possible exposure to HIV.</p> <p>4 Voluntary medical male circumcision (VMMC) is recommended as an additional important strategy for the prevention of heterosexually acquired HIV infection in men, particularly in settings with hyperendemic and generalized HIV epidemics and low prevalence of male circumcision.</p> <p><i>Harm reduction</i></p> <p>5 All people from key populations who inject drugs should have access to sterile injecting equipment through needle and syringe programmes.</p> <p>6 All people from key populations who are dependent on opioids should be offered and have access to opioid substitution therapy in keeping with WHO guidance.</p> <p>7 All people from key populations with harmful alcohol or other substance use should have access to evidence-based interventions, including brief psychosocial interventions involving assessment, specific feedback and advice.</p> <p>8 People likely to witness an opioid overdose should have access to naloxone and be instructed in its use for emergency management of suspected opioid overdose.</p> <p><i>HIV testing and counselling (HTC)</i></p> <p>9 Voluntary HTC should be routinely offered to all key populations both in the community and in clinical settings. Community-based HIV testing and counselling for key populations, linked to prevention, care and treatment services, is recommended, in addition to provider-initiated testing and counselling.</p> <p><i>HIV treatment and care</i></p>                                                                                                                                                                                                                                                                                                                                                                                                                            |

1

|    |                                                                                                                                                                                      |
|----|--------------------------------------------------------------------------------------------------------------------------------------------------------------------------------------|
| 2  | 10 Key populations living with HIV should have the same access to antiretroviral therapy (ART) and to ART management as other populations.                                           |
| 3  | 11 All pregnant women from key populations should have the same access to services for prevention of mother-to-child transmission of HIV (PMTCT) and follow the same                 |
| 4  | recommendations as women in other populations.                                                                                                                                       |
| 5  | <i>Prevention and management of coinfections and co-morbidities</i>                                                                                                                  |
| 6  | 12 Key populations should have the same access to tuberculosis prevention, screening and treatment services as other populations at risk of or living with HIV.                      |
| 7  | 13 Key populations should have the same access to hepatitis B and C prevention, screening and treatment services as other populations at risk of or living with HIV.                 |
| 8  | 14 Routine screening and management of mental health disorders (depression and psychosocial stress) should be provided for people from key populations living with HIV in order to   |
| 9  | optimize health outcomes and improve their adherence to ART. Management can range from co-counselling for HIV and depression to appropriate medical therapies.                       |
| 10 | <i>Sexual and reproductive health</i>                                                                                                                                                |
| 11 | 15 Screening, diagnosis and treatment of sexually transmitted infections should be offered routinely as part of comprehensive HIV prevention and care for key populations.           |
| 12 | 16 People from key populations, including those living with HIV, should be able to experience full, pleasurable sex lives and have access to a range of reproductive options.        |
| 13 | 17 Abortion laws and services should protect the health and human rights of all women, including those from key populations.                                                         |
| 14 | 18 It is important to offer cervical cancer screening to all women from key populations, as indicated in the WHO 2013 cervical cancer screening guidelines.                          |
| 15 | 19 It is important that all women from key populations have the same support and access to services related to conception and pregnancy care, as indicated by WHO guidelines, as     |
| 16 | women from other populations.                                                                                                                                                        |
| 17 | <i>Critical enablers</i>                                                                                                                                                             |
| 18 | 1 Laws, policies and practices should be reviewed and revised where necessary, and countries should work towards decriminalization of behaviours such as drug use/injecting, sex     |
| 19 | work, same-sex activity and non-conforming gender identity and toward elimination of the unjust application of civil law and regulations against people who use/inject drugs, sex    |
| 20 | workers, men who have sex with men and transgender people.                                                                                                                           |
| 21 | 2 Countries should work towards implementing and enforcing antidiscrimination and protective laws, derived from human rights standards, to eliminate stigma, discrimination and      |
| 22 | violence against people from key populations.                                                                                                                                        |
| 23 | 3 Health services should be made available, accessible and acceptable to key populations, based on the principles of medical ethics, avoidance of stigma, non-discrimination and the |
| 24 | right to health.                                                                                                                                                                     |
| 25 | 4 Programmes should work toward implementing a package of interventions to enhance community empowerment among key populations.                                                      |
| 26 | 5 Violence against people from key populations should be prevented and addressed in partnership with key population led organizations. All violence against people from key          |
| 26 | populations should be monitored and reported, and redress mechanisms should be established to provide justice                                                                        |

27 **Key:** {text}, appeared in corrected version; AIDS acquired immune deficiency syndrome; ART, antiretroviral therapy; CD4, T-cell; ECDC, European Centre for Disease Prevention and  
 28 Control; FtM, female to male; GAMI, gender affirming medical intervention; GAS, gender affirming surgery; HBV, hepatitis B virus; HCV, hepatitis C virus; HCP, health care  
 29 professional; HIV, human immunodeficiency virus; MSM, men who have sex with men; MtF, male to female; PWID people who inject drugs; STI, sexually transmitted infection; WHO,  
 30 World Health Organization.

31  
32  
33  
34  
35  
36  
37  
38  
39  
40  
41  
42  
43  
44  
45  
46  
47

Dear Dr Wim Weber and *The BMJ* editorial team,

Please accept this letter and rebuttal table as an appeal against rejection of our submission 'International Clinical Practice Guidelines for Gender Minority/Trans People: Systematic Review and Quality Assessment' (BMJ-2020-061348).

We have substantially revised the manuscript, which we hope you will invite us to resubmit. We are fully aware that this does not guarantee acceptance. The seven excellent peer reviews and your constructive editorial comments made us realize we had done an inadequate job of explaining the scientific rationale, content and implications of our research for clinicians, policy makers and patients. The detailed feedback and interest in the topic expressed by the international expert reviewers allowed us to re-visit and improve all parts of the manuscript, which is now a much better, timelier and potentially impactful paper.

Specifically:

- (1) The reviewers' questions and concerns are all comprehensively answered in the following 21-page rebuttal table.
- (2) Systematic guideline review is a novel and emergent area (inevitably narrative and descriptive), but we have improved our rationale, the explanation of added innovation, the interpretation and flow from question to consistent conclusions.
- (3) We had failed to justify the logic for certain decisions in our study, but have added a stronger research design strategy section to explain the methods.
- (4) We had not initially supplied two further supplementary tables in the results section regarding extracted data, which support and explain the interpretation – our holding back of these original research findings and underestimating the degree to which reviewers might be interested in seeing those results, explains some misunderstanding.
- (5) We have significantly revised the manuscript to highlight relevant content and improve style. We have rewritten the introduction and discussion, with a more dispassionate tone and fewer references.
- (6) We believe the paper is of interest and relevant to generalists in the UK and worldwide. Clinicians around the world are likely to meet gender minority/trans people during their time in practice, and may perhaps rely on the guidelines appraised by our study. Our findings will help doctors make better decisions and consider research priorities.
- (7) We now make more obvious that gender minority/ trans populations are entitled to high quality guidelines and their specific needs should be considered as a matter of equity within all general healthcare guidelines.
- (8) The subject is more topical than at initial submission following the recent Judicial Review on puberty blockers, a substantial event within the UK for this field of clinical practice, which has dismayed many within the gender minority/trans community.
- (9) Our paper goes some way to stay on neutral, scientific ground, offering positive ways forward in a sensitive, political debate.
- (10) We hope *The BMJ* will publish, possibly with an accompanying commentary (or even a 'head-to-head' debate).
- (11) If accepted, we would plan to work both with stakeholders and the evidence-based medicine community to ensure a balanced and positive reception/ press release.

Thank you for acknowledging this somewhat exceptional circumstance. We appreciate your careful re-consideration.

Yours sincerely,  
Sara Dahlen, on behalf of the research team

*(This was sent to BMJ editorial office 17.12.20. Page/line numbers of table below revised to correspond with the manuscript reformatted for BMJ Open 15.1.21)*

## International Clinical Practice Guidelines for Gender Minority/Trans People: Systematic Review

| BMJ Editorial Committee                                                                                                                                                                                                             | Our response                                                                                                                                                                                                                                                                                                                                                                                                                                                                                                                                                                                                                                                                                                                                                                                                                                                                                                                                                                                                                                                                                                                                                                                                                                                                                                                                                                                                                                                                                                                                    | Pg/<br>Ln           |
|-------------------------------------------------------------------------------------------------------------------------------------------------------------------------------------------------------------------------------------|-------------------------------------------------------------------------------------------------------------------------------------------------------------------------------------------------------------------------------------------------------------------------------------------------------------------------------------------------------------------------------------------------------------------------------------------------------------------------------------------------------------------------------------------------------------------------------------------------------------------------------------------------------------------------------------------------------------------------------------------------------------------------------------------------------------------------------------------------------------------------------------------------------------------------------------------------------------------------------------------------------------------------------------------------------------------------------------------------------------------------------------------------------------------------------------------------------------------------------------------------------------------------------------------------------------------------------------------------------------------------------------------------------------------------------------------------------------------------------------------------------------------------------------------------|---------------------|
| We thought your study addresses an important and interesting research question. After discussion, however, we felt that it did not add enough to take it further towards publication in The BMJ.                                    | Thank you. We agree. We appreciate the peer reviewers' careful consideration and constructive comments. The manuscript is greatly improved. We are grateful to you for considering an appeal.                                                                                                                                                                                                                                                                                                                                                                                                                                                                                                                                                                                                                                                                                                                                                                                                                                                                                                                                                                                                                                                                                                                                                                                                                                                                                                                                                   |                     |
| We had the following concerns. The paper is a largely descriptive/narrative evaluation. It might be useful to identify and summarize the quality of guidelines in this area, but we feel the paper is rather opinionated at places. | We agree about the usefulness, but a systematic review (SR) of guidelines can only be descriptive. We realize we had hidden the enlightening findings 'under a bushel'. We have rewritten the paper, revised the introduction, explained the rationale and context better, added 2 supplementary tables with information about the guidelines' content and improved the discussion. We address a contemporary and contested area, and the paper has potential for high impact.                                                                                                                                                                                                                                                                                                                                                                                                                                                                                                                                                                                                                                                                                                                                                                                                                                                                                                                                                                                                                                                                  | All                 |
| The abstract conclusion, for example, does not flow entirely from the findings.                                                                                                                                                     | The abstract conclusion now flows from the findings.                                                                                                                                                                                                                                                                                                                                                                                                                                                                                                                                                                                                                                                                                                                                                                                                                                                                                                                                                                                                                                                                                                                                                                                                                                                                                                                                                                                                                                                                                            | 3-4                 |
| Also, it does not seem necessarily wrong for a specialty society to produce very narrow guidelines about, for example, HIV, so the criticism about 'limited guidance' seems unwarranted.                                            | Thank you. We have improved interpretation. The narrower, and better (HIV), guidelines were largely written by WHO, not specialty societies. The problem is not that guidance is written from an HIV or public health pandemic perspective <i>per se</i> , but that we found so little general guidance even from the relevant specialty societies. This was unexpected, especially in the context of finding minimal overall guidance addressing holistic, life-time needs.                                                                                                                                                                                                                                                                                                                                                                                                                                                                                                                                                                                                                                                                                                                                                                                                                                                                                                                                                                                                                                                                    | 26,<br>427          |
| We wondered about the rationale for focussing on international guidelines only - unless we missed it.                                                                                                                               | <p>Thank you. We have improved the rationale. Our preliminary searches revealed: (i) a paucity of local and national UK guidelines. We accept that a local guideline can be high quality and have added this to discussion; (ii) We had thought the influential 2013 RCPsych "Good Practice Guidelines for Gender Dysphoria" represented the best of UK guidance. We scored this formally during our AGREE II training (and can supply the results if wished) but they are very low quality with no linkage of recommendations to evidence; (iii) RCPsych seemed to be derived from WPATH with a suggestion of 'eminence-based' medicine in an early passage (p 9): "<i>The World Professional Association for Transgender Health's (WPATH) standards of care for transsexual, transgender and gender non-conforming people have informed these UK standards of care. The endorsement by several medical Royal Colleges, allied medical professional societies and service user groups sends a strong signal for the adoption of these guidelines across the UK and beyond</i>"; (iv) Many other countries' guidelines are also derived from WPATH.</p> <p>Thus, given WPATH's influence, we wanted to examine the international scene. We considered our project was identifying and scientifically appraising relevant "primary sources" (the influential international CPGs) rather than "spin offs" (national and local guidelines which reference WPATH as relevant in their development). By focusing on international guidelines, we</p> | 8-9,<br>136-<br>166 |

## International Clinical Practice Guidelines for Gender Minority/Trans People: Systematic Review

|                                                                                                                                        |                                                                                                                                                                                                                                                                                                                                                                                                                                                                                                                                                                                                                                                                                                                                                                                                                                                                                                 |                                                                                     |
|----------------------------------------------------------------------------------------------------------------------------------------|-------------------------------------------------------------------------------------------------------------------------------------------------------------------------------------------------------------------------------------------------------------------------------------------------------------------------------------------------------------------------------------------------------------------------------------------------------------------------------------------------------------------------------------------------------------------------------------------------------------------------------------------------------------------------------------------------------------------------------------------------------------------------------------------------------------------------------------------------------------------------------------------------|-------------------------------------------------------------------------------------|
|                                                                                                                                        | recognise the work and influence of the expertise of professional bodies such as WPATH on UK practice and globally. We thought it would be wrong to compare WPATH and derivative CPGs as this could be seen as duplication. It was also wrong to mix one country (UK) and international CPGs as “apples and pears”. International guidelines such as WHO have greater global relevance and influence than UK ones. Regarding the UK applicability of this study, WPATH has direct relevance. We are based in the UK, are interested in the implications for the NHS and thus wrote the paper for the BMJ. We decided it was prudent to focus on international guidelines in the first instance (as we did not have the resources to examine all international and all national CPGs). We have expanded on all these points in the revised introduction and methods.                             |                                                                                     |
| In the PPI section you indicate relevance to the NHS and getting key stakeholders from the NHS, so why not also include UK guidelines? | Thank you. We have expanded on this in the manuscript. See rationale (above) about choosing international, rather than UK guidelines. We were not confident we could properly identify and contact all international patient/ stakeholder organisations so limited the stakeholder survey to the UK where we had more comprehensive local knowledge. It is the national context in which our team is based, so the two sets of stakeholder and reviewer prioritization results might be more comparable. We conducted the study with the NHS in mind. We elaborate on this point and distinguish between the implications for the UK and other countries in the discussion.                                                                                                                                                                                                                     | <b>13,</b><br><b>260</b><br><b>&amp;</b><br><b>27,</b><br><b>451-</b><br><b>462</b> |
| We wondered about the relevance of the findings for our widespread international clinical readership.                                  | It appears several reviewers agreed that the question is important. The topic would be of great interest to your wide readership. Globally, clinicians in primary care and all fields of medicine are likely to require greater understanding of this increasing patient group and the strengths and deficiencies of specialist guidelines. We have added implications to the discussion.                                                                                                                                                                                                                                                                                                                                                                                                                                                                                                       | <b>26-</b><br><b>28</b>                                                             |
| They would probably be more interested in what exactly is in the guidelines, than this more abstract look at the number and quality.   | We agree. We are sorry we did not supply the key recommendations extracted from the CPGs which informed our interpretation. We now include Table W5 with the revised manuscript. We were unable to fulfil the protocol aim of comparing recommendations across the CPGs as there was not enough overlap for analysis. We were unable to extract key recommendations from WPATH guidance. These are major findings in of themselves that we did not express clearly. In essence, despite its influence, WPATH Standards of Care were “cryptic” (Reviewer 6’s comment) and incoherent. Our work does not lend itself to recognising current WPATH guidance as reliable ‘best practice’ or ‘gold standard’. Patients and clinicians will benefit from its next revision, if WPATH use the principles behind GRADE and AGREE II to improve quality. We hope this now clearer, fairer and evidenced. | <b>23-</b><br><b>24</b><br><b>&amp;</b><br><b>Supl</b>                              |



## International Clinical Practice Guidelines for Gender Minority/Trans People: Systematic Review

1  
2  
3  
4  
5  
6  
7  
8  
9  
10  
11  
12  
13  
14  
15  
16  
17  
18  
19  
20  
21  
22  
23  
24  
25  
26  
27  
28  
29  
30  
31  
32  
33  
34  
35  
36  
37  
38  
39  
40  
41  
42  
43  
44  
45  
46  
47  
48  
49  
50  
51  
52  
53  
54  
55  
56  
57  
58  
59  
60

|                                                                                                                                                                                                                                                                                                                                                                                                                                                                                                                                                                                                                                                                                                                                                                                                                                                                                      |                                                                                                                                                                                                                                                           |                                                            |
|--------------------------------------------------------------------------------------------------------------------------------------------------------------------------------------------------------------------------------------------------------------------------------------------------------------------------------------------------------------------------------------------------------------------------------------------------------------------------------------------------------------------------------------------------------------------------------------------------------------------------------------------------------------------------------------------------------------------------------------------------------------------------------------------------------------------------------------------------------------------------------------|-----------------------------------------------------------------------------------------------------------------------------------------------------------------------------------------------------------------------------------------------------------|------------------------------------------------------------|
| On balance this seems foundational work that is better suited to a more specialised journal.                                                                                                                                                                                                                                                                                                                                                                                                                                                                                                                                                                                                                                                                                                                                                                                         | We disagree. Health equity and improving the quality of clinical guidelines for a minority population is suitable for a generalist journal and broad medical audience.                                                                                    |                                                            |
| <b>Reviewer 1 (Ivan Florez, University of Antioquia)</b>                                                                                                                                                                                                                                                                                                                                                                                                                                                                                                                                                                                                                                                                                                                                                                                                                             | <b>Our response</b>                                                                                                                                                                                                                                       |                                                            |
| Authors present a review on the guidelines for gender minority-trans people. I think is an interestign question that needs to be addressed. However, I found some major isuees tha need to be addressed.                                                                                                                                                                                                                                                                                                                                                                                                                                                                                                                                                                                                                                                                             | Thank you. We agree.                                                                                                                                                                                                                                      |                                                            |
| 1. Introduction highlights the importance of guidelines and how they are used in tainting and practice. Authors also describe that high quality guidelines is a need to better guide users (clinician, policymakers, etc).                                                                                                                                                                                                                                                                                                                                                                                                                                                                                                                                                                                                                                                           | Thank you. We agree.                                                                                                                                                                                                                                      |                                                            |
| However, the narrative is a bit disconnected in some ideas. After explaining the importance of this high quality, authors state that experts are relying on guidelines that are biased by clinical observation, before an dafter studies and proxy measures, and the industry funded research. The problem with this last ideas is two-fold. First, it is not clear how from high quality authors migrate to specific limitations of “some” guidelines, in some specific cases. Also, that authors use the GRADE papers to support this idea. The GRADE approach that is cited, describe what is the concept of the quality of evidence and the foundations of the GRADE approach. The concepts described (proxy measures, before and after studies, and industry funded, of course are problem, but I might say they aren’t the most important in terms of !quality of guidelines”. | Thank you. We have rewritten the introduction in line with these constructive comments, emphasising for readers that quality CPGs rely on (i) evidence that goes in (GRADE) and (ii) the process of linking this to recommendations (AGREE II appraisal). | <b>6-9</b>                                                 |
| So, to clarify these ideas, I think authors should introduce better the concept go “quality of the guidelines”, which is what they try to highlight after they mention that High quality guidelines are key. How to define high quality? Authors may describe some concepts that underpin this concept. Also, GRAdE, although is associated with higher quality of guidelines, is not an approach or a tool to define it; it is an approach to assess the quality of the evidence that is selected and appraisal during the development of a guideline.                                                                                                                                                                                                                                                                                                                              | Thank you. We have rewritten the introduction in line with these suggestions.                                                                                                                                                                             | <b>6-9</b>                                                 |
| 2. In the same way, additional ideas/sentences area bit disconnected. For instance, “At national level, there are recognized methods to produce CPGs[2,9,10]. Health Technology Agencies are available worldwide to provide independent assurance and benchmarking[11,12]”. In the first sentence, the idea is that a national level (and I suppose this means in the UK; authors should clarify) there are methods for that. I think authors should briefly explain about this methods.                                                                                                                                                                                                                                                                                                                                                                                             | Thank you. We have clarified where “national” means the UK versus all countries. We explain the UK context in the introduction, and implications for the UK and other countries in the discussion.                                                        | <b>8</b><br>136-<br>156<br>&<br><b>27</b> ,<br>451-<br>462 |
| Also, the second sentence describes “HTA agencies that are available worldwide to provide...”. The problem here is that there is an introduction of the concept of HTA. What is HTA? What is the relationship of HTA with CPGs?                                                                                                                                                                                                                                                                                                                                                                                                                                                                                                                                                                                                                                                      | Thank you. We have removed the reference to HTA agencies from the introduction as less relevant.                                                                                                                                                          | <b>6-9</b>                                                 |

## International Clinical Practice Guidelines for Gender Minority/Trans People: Systematic Review

|                                              |                                                                                                                                                                                                                                                                                                                                                                                                                                 |                                                                                                                                                                                                                                                                                                            |                                            |
|----------------------------------------------|---------------------------------------------------------------------------------------------------------------------------------------------------------------------------------------------------------------------------------------------------------------------------------------------------------------------------------------------------------------------------------------------------------------------------------|------------------------------------------------------------------------------------------------------------------------------------------------------------------------------------------------------------------------------------------------------------------------------------------------------------|--------------------------------------------|
| 3<br>4<br>5                                  | It is clear that in the UK, there is one single organization that develops both CPGs and HTA. This is not the case in the rest of the world.                                                                                                                                                                                                                                                                                    | Thank you. We have clarified and separately addressed the implications for UK and rest of the world in the discussion.                                                                                                                                                                                     | <b>27,</b><br>451-<br>462                  |
| 6<br>7<br>8<br>9                             | The vast majority of organizations around the world have one or several HTA agencies that do not develop CPGs. There are some of them that do both, of course, but this cannot be used to describe an idea about the methods of CPGs.                                                                                                                                                                                           | Thank you. We have removed the reference to HTAs.                                                                                                                                                                                                                                                          | <b>6-9</b>                                 |
| 10<br>11<br>12<br>13<br>14<br>15<br>16       | 3. Also, the sentence that comes immediately after: "Guideline developers should respond to, and guide, research". What does this mean?                                                                                                                                                                                                                                                                                         | Thank you. We believe a systematic approach to evidence identifies gaps that should in turn feedback into research, e.g. in the UK there is a mechanism for NICE research recommendations to be used in NIHR funding and grant applications. Nevertheless, we have removed this sentence as less relevant. | <b>6-9</b>                                 |
| 17<br>18<br>19<br>20<br>21<br>22<br>23<br>24 | Does this mean that Developers should use the research evidence (what they normally do), and also that they should provide input for future research (some kind of research prioritization tool?) . if the latter is the case, what is the relationship of this provide input for future research (some kind of research prioritization tool?). if the latter is the case, what is the relationship of this with their quality? | Thank you. Our paper is not the place to discuss these issues though we believe there is an iterative process as above. NICE guideline development groups are charged with producing 'recommendations for research', and sometimes recommends "only use in research". We have removed this.                | <b>6-9</b>                                 |
| 25<br>26<br>27<br>28<br>29<br>30             | 4. Moreover, the following sentence is problematic: "CPGs developed by global experts and aimed at international audiences should be evidence-based, rigorous in methodology" Does this mean that a CPG to be of high quality must be developed by global experts? What does it mean to be global expert? I strongly disagree with this statement.                                                                              | Thank you. We were unclear. We have removed the term 'global experts'. We have clarified that local or national CPGs may be of higher quality than international CPGs.                                                                                                                                     | <b>25,</b><br>401                          |
| 31<br>32<br>33                               | A CPG can be or very high quality, even developed by experts that are not "global" and even if the guideline is aimed to inform a local audience only.                                                                                                                                                                                                                                                                          | We agree. We have incorporated this point.                                                                                                                                                                                                                                                                 | <b>25,</b><br>401                          |
| 34<br>35<br>36<br>37                         | Quality, and I insist on the idea that authors have not appropriately described the concept of quality, does not depend of the degree of "international experts or the scope (international audience)"                                                                                                                                                                                                                          | We agree. We have rewritten our introduction.                                                                                                                                                                                                                                                              | <b>6-9</b>                                 |
| 38<br>39<br>40<br>41                         | 5. In reading the methods, I understood the interest of authors of highlighting in the methods the idea of "international guidelines"; as they focused only on these guidelines.                                                                                                                                                                                                                                                | Thank you. We explain the rationale better in revised introduction and methods.                                                                                                                                                                                                                            | <b>8-9,</b><br>137-<br>166                 |
| 42<br>43<br>44<br>45                         | Although, my comment on how the quality is not linked to the scope of guideline does not change, I think authors are not providing enough rationale in (introduction or methods), about why to focus on International's guidelines only.                                                                                                                                                                                        | Thank you. We agree and have addressed rationale better.                                                                                                                                                                                                                                                   | <b>8-9</b><br>137-<br>166                  |
| 46<br>47<br>48<br>49<br>50                   | In fact, the development of guidelines that are international in scope have additional challenges (e.g., the implementability of the recommendation might not be easily translated among different contexts).                                                                                                                                                                                                                   | Thank you. We agree and have added this point. It is pertinent for gender minority/trans health because WPATH guidelines are so widely adapted. We draw attention to additional challenges and adoption in discussion.                                                                                     | <b>8,</b><br>153<br>&<br><b>27,</b><br>461 |
| 51<br>52<br>53                               | I am not saying international guidelines should not be developed, but many times they require some efforts to contextualize in each country or settings.                                                                                                                                                                                                                                                                        | Thank you. We have added this point. It is important for countries to be aware of WPATH's quality limitations when contextualizing.                                                                                                                                                                        | <b>27,</b><br>457                          |
| 54<br>55<br>56                               | I mention this challenge, because authors' interest in these guidelines should be discussed as these guidelines are their                                                                                                                                                                                                                                                                                                       | Thank you, we have strengthened the rationale.                                                                                                                                                                                                                                                             | <b>8-9,</b><br>137-                        |

## International Clinical Practice Guidelines for Gender Minority/Trans People: Systematic Review

|    |                                                                                                                                                                                                                                                                                                                                                                                                                                                                                                                                                              |                                                                                                                                                                                                                                                                                                                                                                                                                                                                                                                                                                                                                                                                                                                                                                                                                                                                                                   |                    |
|----|--------------------------------------------------------------------------------------------------------------------------------------------------------------------------------------------------------------------------------------------------------------------------------------------------------------------------------------------------------------------------------------------------------------------------------------------------------------------------------------------------------------------------------------------------------------|---------------------------------------------------------------------------------------------------------------------------------------------------------------------------------------------------------------------------------------------------------------------------------------------------------------------------------------------------------------------------------------------------------------------------------------------------------------------------------------------------------------------------------------------------------------------------------------------------------------------------------------------------------------------------------------------------------------------------------------------------------------------------------------------------------------------------------------------------------------------------------------------------|--------------------|
| 3  | scope. Moreover, I wonder, why authors focused on them?<br>4 They might want to provide a good rationale in the<br>5 introduction.                                                                                                                                                                                                                                                                                                                                                                                                                           |                                                                                                                                                                                                                                                                                                                                                                                                                                                                                                                                                                                                                                                                                                                                                                                                                                                                                                   | 166                |
| 6  | 6. Why focusing on guidelines after 2010? Authors need to<br>7 provide a rationale on this as well.                                                                                                                                                                                                                                                                                                                                                                                                                                                          | Thank you. We have provided a rationale. We wanted to focus<br>8 on the current landscape. A five year restriction would have<br>9 excluded WPATH SoCv7 (2011) which would have been<br>10 detrimental. Further back, CPGs might have been out of date.<br>11 The paper is important and timely as updating for WPATH<br>12 SoCv8 is underway.                                                                                                                                                                                                                                                                                                                                                                                                                                                                                                                                                    | 10,<br>189         |
| 13 | 7. The Gender Minority/Trans People population is clearly<br>14 stated by authors.                                                                                                                                                                                                                                                                                                                                                                                                                                                                           | Thank you.                                                                                                                                                                                                                                                                                                                                                                                                                                                                                                                                                                                                                                                                                                                                                                                                                                                                                        |                    |
| 15 | However, the eligibility criteria is not clear. For instance, if a<br>16 guideline is on a topic that is clearly related to this population<br>17 (for instance HIV), but the population is not clearly stated as<br>18 targeted to this population, was the guideline considered?                                                                                                                                                                                                                                                                           | We were interested in CPGs where gender minority/trans people<br>19 were expressly considered for a recommendation, whatever the<br>20 topic. All CPGs were considered even when gender<br>21 minority/trans health was not the main subject (eg oncology<br>22 communication). We do not believe that HIV is more 'clearly<br>23 related' to this population than, say, osteoporosis or<br>24 polycythaemia related to sex hormones. The vast majority of<br>25 gender minority/ trans people do not have HIV. We would<br>26 counsel against stereotyping or thinking solely about trans<br>27 women and not trans men or non-binary people. Gender<br>28 minority/trans people mostly have the same sorts of illnesses/<br>29 health concerns as the general population. If recommendations<br>30 did not have an explicit mention of gender minority/trans people<br>31 the CPG was excluded. | 10,<br>182-<br>198 |
| 32 | 8. The following sentence: "exposure/ intervention was any<br>33 health intervention related to gender dysphoria or gender<br>34 affirmation, or health concerns of gender minority/trans people,<br>35 including screening, assessment, referral, diagnosis and<br>36 interventions" gives me the idea that authors are trying to<br>37 make this review fit into the commonly used PICO/PECO<br>38 format, with the use of the "exposure" category.                                                                                                        | We agree. SR of guidelines is a developing field, and the<br>39 standard methodological literature has yet to catch up. We could<br>40 have developed a new initialisation set, but as PECO is readily<br>41 understandable this was retained.                                                                                                                                                                                                                                                                                                                                                                                                                                                                                                                                                                                                                                                    | 10,<br>182-<br>198 |
| 39 | Methods for Systematic reviews of Guidelines, although still<br>40 under development, are clearly not considering the idea of<br>41 "exposure", which is only applicable to reviews interested in<br>42 collecting evidence from studies that measure the "exposure",<br>43 usually of observational studies, to determine risk factors or<br>44 prognostic.                                                                                                                                                                                                 | Thank you. As the reviewer notes, this is a developing field, so<br>45 there is room for disagreement. See comment above.                                                                                                                                                                                                                                                                                                                                                                                                                                                                                                                                                                                                                                                                                                                                                                         |                    |
| 45 | 9. "Exclusion criteria" are defined as those scenarios that<br>46 occur in patients/articles that you have already included, but<br>47 for any particular reason, you need to exclude. In other words,<br>48 exclusion criteria should not be a "negative of the inclusion<br>49 criterion". Thus, studies published before 2010, should not be<br>50 excluded. Same for other criteria, such as : single country,<br>51 adaptations of another CPG, original research, reviews, letters,<br>52 opinions, editorials, case-reports, books, and commentaries. | Thank you. We have removed these exclusion criteria from the<br>53 manuscript.                                                                                                                                                                                                                                                                                                                                                                                                                                                                                                                                                                                                                                                                                                                                                                                                                    | 10,<br>191-<br>198 |
| 52 | 10. Not clear to me how the Agency for Healthcare Research<br>53 and Quality National Guideline Clearinghouse was searched if<br>54 this database does not exist anymore (this database migrated<br>55 to ECRI institute)                                                                                                                                                                                                                                                                                                                                    | Thank you. We explain that CM manually examined the AHRQ<br>56 national guidelines clearinghouse archive that remains in the<br>57 internet (not maintained since 2017)                                                                                                                                                                                                                                                                                                                                                                                                                                                                                                                                                                                                                                                                                                                           | 11,<br>208         |

## International Clinical Practice Guidelines for Gender Minority/Trans People: Systematic Review

|                                                                                                                                                                                                                                                                                                                                                                                                                                            |                                                                                                                                                                                                                                                                                                                                                                                                                                                                                                                                                                                                                                                                                                                                                                                                                                                                                                                                                                                                                                                                                                                                                                                                                                                                                                                                                                                                                                                                                                                                                                                                                                                                                      |                                                                                                                 |
|--------------------------------------------------------------------------------------------------------------------------------------------------------------------------------------------------------------------------------------------------------------------------------------------------------------------------------------------------------------------------------------------------------------------------------------------|--------------------------------------------------------------------------------------------------------------------------------------------------------------------------------------------------------------------------------------------------------------------------------------------------------------------------------------------------------------------------------------------------------------------------------------------------------------------------------------------------------------------------------------------------------------------------------------------------------------------------------------------------------------------------------------------------------------------------------------------------------------------------------------------------------------------------------------------------------------------------------------------------------------------------------------------------------------------------------------------------------------------------------------------------------------------------------------------------------------------------------------------------------------------------------------------------------------------------------------------------------------------------------------------------------------------------------------------------------------------------------------------------------------------------------------------------------------------------------------------------------------------------------------------------------------------------------------------------------------------------------------------------------------------------------------|-----------------------------------------------------------------------------------------------------------------|
| <p>11. The use of the term: “clinical practice guidelines” as only term to identify guidelines might not be enough. Many guidelines may be labeled simply as “recommendations”, or “statements” “practice parameters”, among others.</p>                                                                                                                                                                                                   | <p>Thank you. We have not altered the manuscript but hope the following explanation satisfies: our search strategy was checked by CM (a very experienced systematic reviewer in this area) and a British Library Science information specialist. We did come across this definitional problem, which is not unique to this SR. Therefore we kept the search strategy very wide, and searched multiple places in order to find as many includable papers as possible, adding a hand-search of journals, contact with key opinion leaders for information (they did not bring up any ‘statements’ or ‘practice parameters’ that we missed) and Google searches. If the peer reviewer knows of any includable CPGs we missed we would be very happy to include them.</p>                                                                                                                                                                                                                                                                                                                                                                                                                                                                                                                                                                                                                                                                                                                                                                                                                                                                                                                | <p><b>9,</b><br/><b>178</b><br/><b>&amp;</b><br/><b>10,</b><br/><b>200</b><br/><b>&amp;</b><br/><b>Supl</b></p> |
| <p>Of note, this comment applies at least in many diseases; but, as I am not expert in the topic- gender minorities- this might be or not applicable to this population guidelines.</p>                                                                                                                                                                                                                                                    | <p>Thank you. We read a lot of full-text articles in our efforts to be cautious and did not find any examples of this being a problem.</p>                                                                                                                                                                                                                                                                                                                                                                                                                                                                                                                                                                                                                                                                                                                                                                                                                                                                                                                                                                                                                                                                                                                                                                                                                                                                                                                                                                                                                                                                                                                                           |                                                                                                                 |
| <p>12. The selection process is well written and it seems to be appropriate</p>                                                                                                                                                                                                                                                                                                                                                            | <p>Thank you.</p>                                                                                                                                                                                                                                                                                                                                                                                                                                                                                                                                                                                                                                                                                                                                                                                                                                                                                                                                                                                                                                                                                                                                                                                                                                                                                                                                                                                                                                                                                                                                                                                                                                                                    |                                                                                                                 |
| <p>13. Authors did a an AGREE II domain prioritization process. Although interesting, the reason for ding this was not clear and there is not a clea rationale</p>                                                                                                                                                                                                                                                                         | <p>Thank you. We have added the reason and rationale to the manuscript. We recommend other countries do their own stakeholder prioritisations. It returns to the question of “What is good quality?” Setting quality thresholds is part of the AGREE II process. The guide is not prescriptive but gives various suggestions including: “Any decisions about how to define quality thresholds should be made by a panel of all relevant stakeholders before beginning the AGREE II appraisals. Decisions should be guided by the context in which the guideline is to be used and by evaluating the importance of the different domains and items in that context.” We decided stakeholder views should inform the work. We ran dual prioritisation collection exercises, for the internal reviewer team and external stakeholders. We kept our own rankings anonymous in order to safely reflect on our views and biases, to understand the team’s domain priorities (which might have been important in the calibrating/ instrument training process/ discussion) and to compare these to the external stakeholder respondents. As we understand the UK context and were writing for the BMJ, we felt it would be more useful to compare “like with like”. We could focus on breadth and depth with a comprehensive variety of UK stakeholder groups, rather than be too thin internationally. This would have been more important had we found CPGs that scored differentially ‘well’ or ‘badly’ by the different prioritisation. As it happened, the CPGs scored high and low on stakeholder involvement (stakeholder priority) and rigour (our priority) <i>pari passu</i>.</p> | <p><b>13,</b><br/><b>255-</b><br/><b>258</b></p>                                                                |
| <p>14. Authors describe how the appraisers competed the AGREE training modules. However, there is no information on participants in the consultation knowledge about the domain, or experience with AGREE. In this survey authors asked about the domains, and people, who perhaps was the first time they heard about the tool, were scoring or deciding what domain should be prioritized. Although this is an interesting approach,</p> | <p>Thank you. We have added more information to the methods. Readers can access the SurveyMonkey link to see the exact wording, what queries were asked and the links to further resources including our protocol. Whilst there must be some uncertainty regarding the results, on the other hand we were writing to advocacy organisations. No stakeholder asked for clarification or more information. We expand on this point in</p>                                                                                                                                                                                                                                                                                                                                                                                                                                                                                                                                                                                                                                                                                                                                                                                                                                                                                                                                                                                                                                                                                                                                                                                                                                              | <p><b>13,</b><br/><b>267</b><br/><b>&amp;</b><br/><b>19,</b><br/><b>327</b><br/><b>&amp;</b><br/><b>25,</b></p> |

## International Clinical Practice Guidelines for Gender Minority/Trans People: Systematic Review

|                                                                                                                      |                                                                                                                                                                                                                                                                                                                    |                                                                                                                                                                                                                                                                                                                                                                                                                                                                                                                                                                                                                                                                                                                                                                                                                                                                                                                                                                                                                                                                                                                                                          |                                                               |
|----------------------------------------------------------------------------------------------------------------------|--------------------------------------------------------------------------------------------------------------------------------------------------------------------------------------------------------------------------------------------------------------------------------------------------------------------|----------------------------------------------------------------------------------------------------------------------------------------------------------------------------------------------------------------------------------------------------------------------------------------------------------------------------------------------------------------------------------------------------------------------------------------------------------------------------------------------------------------------------------------------------------------------------------------------------------------------------------------------------------------------------------------------------------------------------------------------------------------------------------------------------------------------------------------------------------------------------------------------------------------------------------------------------------------------------------------------------------------------------------------------------------------------------------------------------------------------------------------------------------|---------------------------------------------------------------|
| 3<br>4<br>5<br>6<br>7<br>8<br>9<br>10<br>11                                                                          | more info on this might be needed to understand the results of this exercise.                                                                                                                                                                                                                                      | limitations. We believe more could be done in future to ensure stakeholders are involved, from the generation of questions, through research participation to the dissemination of guidelines. We reference the James Lind Initiative. When published, we would wish to work with the stakeholder organisations and KOLs we contacted to ensure consistent 'messaging' of the results (e.g. in a press release) as we are conscious of community sensitivities.                                                                                                                                                                                                                                                                                                                                                                                                                                                                                                                                                                                                                                                                                          | 398                                                           |
| 12<br>13<br>14<br>15<br>16                                                                                           | 15. In page 13, line 268, in the use of "outcomes" applies the same comment I did before about "exposure";, i dint see this is applicable in this kind of reviews. Thus, the use of primary and secondary outcomes is not, from my point of view, and appropriate way to describe the methods.                     | Thank you. This is how the PROSPERO website records the protocol. For the purposes of the manuscript we have now listed them in order.                                                                                                                                                                                                                                                                                                                                                                                                                                                                                                                                                                                                                                                                                                                                                                                                                                                                                                                                                                                                                   | 12,<br>243-<br>248                                            |
| 17<br>18<br>19<br>20<br>21                                                                                           | I see an interest in making this review fit into a PICO/PECO format which does not apply                                                                                                                                                                                                                           | Thank you. SR of guidelines is a developing field and this point is unwarranted. The format does apply, works, and our guideline review was one of several others in the PROSPERO database where protocols are assessed before being allowed to be uploaded.                                                                                                                                                                                                                                                                                                                                                                                                                                                                                                                                                                                                                                                                                                                                                                                                                                                                                             |                                                               |
| 22<br>23<br>24<br>25<br>26<br>27<br>28<br>29<br>30<br>31<br>32<br>33<br>34<br>35<br>36<br>37<br>38<br>39<br>40<br>41 | 16. Authors do not prove an explanation on (some of the following are provided by the AGREE collaboration, but authors need to clearly state these methods)<br>- how the score of AGREE work<br>- How many assessors were, per guideline<br>- How they managed disagreements<br>- How they calculated final scores | Thanks. We think there is a distinction between putting enough information in our methods to allow for replication and fully explaining a standard instrument. We had provided most of this information but have amended for clarity.<br>-The scores given range from 1-7 in 23 sections and 6 domains.<br>-There were six assessors for each guideline.<br>-The AGREE II instrument has capacity for inter-rater variation and calculates the final scores (as detailed elsewhere).<br>Disagreement in scoring is not applicable here as we compensated for any differences between scorers using more than the recommended number (four). Scores were automatically generated by the myAgree platform. Each rater gives an individual score for each element of each domain. We are happy to supply the raw scores data if required.<br>-If the reviewer means disagreement or discussion at calibration/training stage, we took the view there was no "right" or "wrong" answer. Rather, we performed two pilots and examined the results as group learning to ensure we were fairly assessing CPGs using the instrument and discussed disagreements. | 9,<br>166-<br>174<br>&<br>13<br>250-<br>253<br>&<br>25<br>396 |
| 42<br>43<br>44<br>45<br>46<br>47<br>48<br>49<br>50<br>51<br>52<br>53<br>54                                           | - what was going to be the role of the results of the prioritization exercise on the analyses?                                                                                                                                                                                                                     | We have clarified this. The prioritisation exercise was to help set quality thresholds for what constitutes a "good" AGREE II score. It was not to change the analyses, but to focus on the domains that mattered most when interpreting the results. For further justification we refer to p10 of the most recent 2017 update PDF on the AGREE II instrument website, which refers to the following explanations: "ii) Interpreting Domain Scores. • Prioritizing one domain: • Staged AGREE II appraisal: • Considering all domain scores: • Thresholds for improvement over time." In the event (as commended by Reviewer 3, one of the AGREE II architects), we decided against choosing a quality threshold after the prioritization exercise.                                                                                                                                                                                                                                                                                                                                                                                                      | 13,<br>255-<br>260<br>&<br>14<br>272                          |
| 55<br>56                                                                                                             | 17. In the discussion, if we consider the Trans population a minority, I think including this population in guidelines is a                                                                                                                                                                                        | Thank you. We agree and have added this point about equity.                                                                                                                                                                                                                                                                                                                                                                                                                                                                                                                                                                                                                                                                                                                                                                                                                                                                                                                                                                                                                                                                                              | 26,<br>429-                                                   |

## International Clinical Practice Guidelines for Gender Minority/Trans People: Systematic Review

|                                                          |                                                                                                                                                                                                                                                                                                                                                                 |                                                                                                                                                                                                                                                                                                                                                                                                                                                                                                                                                                                               |                                                               |
|----------------------------------------------------------|-----------------------------------------------------------------------------------------------------------------------------------------------------------------------------------------------------------------------------------------------------------------------------------------------------------------------------------------------------------------|-----------------------------------------------------------------------------------------------------------------------------------------------------------------------------------------------------------------------------------------------------------------------------------------------------------------------------------------------------------------------------------------------------------------------------------------------------------------------------------------------------------------------------------------------------------------------------------------------|---------------------------------------------------------------|
| 1<br>2<br>3                                              | matter of equity.                                                                                                                                                                                                                                                                                                                                               |                                                                                                                                                                                                                                                                                                                                                                                                                                                                                                                                                                                               | 431                                                           |
| 4<br>5<br>6<br>7<br>8<br>9<br>10                         | Although I am not expert in this specific population, neither in equity, I am aware of some methodological approaches to consider equity and the consideration of minority groups in guidelines. Publications from the GRADE working group and related: PMID: 28802675, PMID: 28499847, PMID: 28412464, PMID: 28389397, PMID: 29029068 , have cover this issue. | Thank you. We have read and incorporated these helpful references.                                                                                                                                                                                                                                                                                                                                                                                                                                                                                                                            | <b>26</b> ,<br>429-<br>435                                    |
| 11<br>12<br>13<br>14<br>15<br>16<br>17<br>18             | There are several approaches to include minority populations in guidelines: 1) consider specific guidelines on these populations; [2] ( <i>sic</i> ) consider a health topic and develop recommendations with a strong consideration of equity issues; and 3) including specific recommendations only targeted to thesis populations.                           | Thank you. The reviewer refers to three approaches to developing CPGs. We were not writing CPGs, but searching for all types. We tried to include all that covered any aspect of gender minority/ trans health, with the most inclusive definitions we could muster. Nevertheless, this comment led us to review the meaning of our sparse findings and descriptive analysis. We now refer to 'complete', 'partial' or 'marginal' focus of content/ recommendations. We have added equity to implications.                                                                                    | <b>26</b> ,<br>429-<br>435                                    |
| 19<br>20<br>21<br>22<br>23<br>24<br>25<br>26<br>27<br>28 | In the case of trans people, any can be applied and it seems to me authors considered all the options, but in the end they did not classify the guidelines following this (or any other framework),                                                                                                                                                             | Thank you. It is correct we considered all these options. We did originally label (or classify) the guidelines as full, partial and minimal, which can be viewed as short-hand for the types of guidelines the reviewer notes (i.e. 'full' is a specific guideline <i>on</i> this population, 'partial' is one with strong consideration of this population, like HIV, and 'minimal' is writing one or more specific targeted recommendations, like oncology communication). Now classified as 'complete', 'partial' and 'marginal', we have clarified this under data extraction in methods. | <b>12</b> ,<br>238-<br>241                                    |
| 29<br>30<br>31<br>32<br>33<br>34<br>35                   | This is helpful for analysis and for determining next steps. For instance, for some topics, different approaches might be better than the others. Authors failed to discuss on this.                                                                                                                                                                            | Thank you. These helpful comments helped refine our classification. We have included equity in the discussion.                                                                                                                                                                                                                                                                                                                                                                                                                                                                                | <b>12</b> ,<br>238-<br>241<br>&<br><b>26</b> ,<br>429-<br>435 |
| 36<br>37<br>38<br>39                                     | It should not be considered the same a guideline only for this population than guideline others. Authors failed to discuss on this.                                                                                                                                                                                                                             | Thank you. We had discussed the difference between guidelines for this population only (transition) versus being one of several populations (HIV) but not fully enough. We have expanded our interpretation.                                                                                                                                                                                                                                                                                                                                                                                  | <b>26</b> ,<br>422-<br>435                                    |
| 40<br>41<br>42<br>43<br>44<br>45<br>46                   | It should not be considered the same a guideline only for this population than guideline on a topic that covers this population somehow.                                                                                                                                                                                                                        | Thank you. We agree. General CPGs that mention gender minority/trans health should not be considered the same as gender minority/trans-only ones. However, we tried to assess the entire landscape. CPGs covering any aspect of gender minority/trans health should be subject to the same quality appraisal.                                                                                                                                                                                                                                                                                 |                                                               |
| 47<br>48<br>49<br>50<br>51<br>52<br>53<br>54             | Also this has impact on the search strategy. In the first case I describe, the search strategy that has been used might appropriate, but in the latter, it might be not, and additional terms focused on diseases that may be of importance for this population need to be added.                                                                               | Thank you. We agree. Our main strategy was to locate all of the first case. Nevertheless, we believe our deliberately inclusive search strategy was adequate enough for the latter (as shown by the large number of excluded CPGs, and by finding oncology and HIV guidelines at least). Although no reviewer gave an example, we accept there may be more general CPGs (say in cardiology) that we missed. We have added this as a potential limitation.                                                                                                                                     | <b>25</b> ,<br>405-<br>407                                    |
| 55<br>56<br>57<br>58<br>59<br>60                         | 18. Final overall comment                                                                                                                                                                                                                                                                                                                                       | See earlier justification of the international focus and                                                                                                                                                                                                                                                                                                                                                                                                                                                                                                                                      |                                                               |

## International Clinical Practice Guidelines for Gender Minority/Trans People: Systematic Review

1

2

3

4

5

6

7

8

9

10

11

12

13

14

15

16

17

18

19

20

21

22

23

24

25

26

27

28

29

30

31

32

33

34

35

36

37

38

39

40

41

42

43

44

45

46

47

48

49

50

51

52

53

54

55

56

57

58

59

60

|                                                                                                                                                                                                                                                                                                                                                                                                                                                                                                                                                                                                      |                                                                                              |         |
|------------------------------------------------------------------------------------------------------------------------------------------------------------------------------------------------------------------------------------------------------------------------------------------------------------------------------------------------------------------------------------------------------------------------------------------------------------------------------------------------------------------------------------------------------------------------------------------------------|----------------------------------------------------------------------------------------------|---------|
| I think authors may have good reasons to focus on international guidelines, but I think the rationale is not clear in the manuscripts and I think the applicability of the work is limited when authors narrowed the scope to these guidelines. My main general comment is that authors might consider including all the guidelines (not only international), and this might make the study more interesting                                                                                                                                                                                         | applicability.                                                                               |         |
| Minor comments:<br>19. The following sentence is not accurate: "Clinicians have been criticised for not using methodological rigour when writing reliable evidence-based guidelines[74]". the reasons why guidelines are of low quality do not depend on clinicians. In fact, clinicians are the last to blame. The poor methodology that has been criticized is more frequently caused by experts in methodology that are in charge of the evidence search and synthesis, than by clinicians that are participating in guideline development.                                                       | Thank you. We have changed this to developers.                                               | 25, 416 |
| 20. NHS acronym, used in page 13, line 262, has not been previously defined                                                                                                                                                                                                                                                                                                                                                                                                                                                                                                                          | Thank you. We define National Health Service (NHS).                                          | 8, 145  |
| <b>Reviewer 2 (Anna R Gagliardi, University Health Network/University of Toronto)</b>                                                                                                                                                                                                                                                                                                                                                                                                                                                                                                                |                                                                                              |         |
| Many thanks for the opportunity to review this study, which I enjoyed reading. It addresses an important topic, appears to have been well-executed, and revealed substantial gaps that must be addressed through policy, practice and research. However, the paper would be easier to read and understand with some additional detail and clarification across all sections as described here.                                                                                                                                                                                                       | Thank you. We agree.                                                                         |         |
| INTRO<br>The first section on guidelines includes relevant key concepts but reads as a "laundry list" of topics. Consider organizing this content into distinct paragraphs and potentially re-order and re-word some of the concepts to enhance flow.                                                                                                                                                                                                                                                                                                                                                | Thank you. We have rewritten the introduction.                                               | 6-9     |
| For example, paragraph one: introduce guidelines and how they support high quality health care delivery; paragraph two: despite widely recognized principles and methods for developing sound guidelines, current research shows that guidelines on various topics lack x, y and z OR scored poorly when assessed for methodological quality [cite very recent studies that assessed guideline quality]. This finding emphasizes the ongoing need to appraise guidelines on various topics to ensure that patients, family/caregivers and clinicians have access to the best evidence-informed care. | Thank you. We have rewritten the introduction with these points.                             | 6-9     |
| Please also address some grammar and clarity issues. For example: "At national level, there are recognized methods to produce CPGs." Should this be "levels"? Or would it be more appropriate to say globally-recognized approaches/methods?                                                                                                                                                                                                                                                                                                                                                         | Thank you. We have removed this.                                                             |         |
| What does this mean: "Guideline developers should respond to, and guide, research." Use active voice, which is easier to read (e.g. Organizations have produced globally-recognized                                                                                                                                                                                                                                                                                                                                                                                                                  | Thank you. We have removed this comment. We use more of the active voice within the article. |         |

## International Clinical Practice Guidelines for Gender Minority/Trans People: Systematic Review

|                                                                                                                                                                                                                                                                                                                                                                                                                                          |                                                                                                                                                                                                                                                                                                                   |                                                                                   |
|------------------------------------------------------------------------------------------------------------------------------------------------------------------------------------------------------------------------------------------------------------------------------------------------------------------------------------------------------------------------------------------------------------------------------------------|-------------------------------------------------------------------------------------------------------------------------------------------------------------------------------------------------------------------------------------------------------------------------------------------------------------------|-----------------------------------------------------------------------------------|
| methodological guidance for developing robust guidelines), and do so throughout (e.g. We searched six databases...)                                                                                                                                                                                                                                                                                                                      |                                                                                                                                                                                                                                                                                                                   |                                                                                   |
| There are also some grammar/clarity issues in the next section on gender minority/trans people. For example: "Despite efforts to depathologise [what, exactly?],..." and "Gender minority/trans people may experience more mental health...[more than who?]."                                                                                                                                                                            | Thank you. We have removed this.                                                                                                                                                                                                                                                                                  |                                                                                   |
| Introduce AGREE in Methods, not Introduction.                                                                                                                                                                                                                                                                                                                                                                                            | Thank you. We have revised the manuscript; it now mentions AGREE II in the introduction, but expands on the detail and justification in the Methods.                                                                                                                                                              | <b>6,</b><br><b>109</b><br><b>&amp;</b><br><b>9,</b><br><b>166-</b><br><b>174</b> |
| Blend aim/purpose statement with previous paragraph rather than including this statement in a separate section.                                                                                                                                                                                                                                                                                                                          | Thank you. Done.                                                                                                                                                                                                                                                                                                  | <b>9,</b><br><b>157</b>                                                           |
| Emphasize that, while WPATH guidelines are available, no prior study has investigated the number and quality of guidelines to support the care and well-being of gender minority/trans people. Thus, it is not known if guidelines are available to persons, family/caregivers or clinicians that would optimize care, and health and well-being. The purpose of this study was to identify and appraise the quality of guidelines on... | Thank you. We have added this to the introduction.                                                                                                                                                                                                                                                                | <b>8,</b><br><b>156</b>                                                           |
| <b>METHODS</b><br>Start with an Approach or Research Design section that provides the reader with a high-level sense of the methodological approaches used, justification for those approaches, and references for those approaches and for relevant reporting standards for the systematic review and for reporting electronic search strategies (i.e. PRESS).                                                                          | Thank you for this very helpful suggestion. Done.                                                                                                                                                                                                                                                                 | <b>9,</b><br><b>162</b>                                                           |
| Justify why Jan 1, 2010 was chosen as the start date.                                                                                                                                                                                                                                                                                                                                                                                    | Thank you. We have added the rationale. We wanted to focus on the current landscape. A five-year restriction would have excluded WPATH SoCv7 (2011) which would have been detrimental. Further back, CPGs might have been out of date. The paper is important and timely as updating for WPATH SoCv8 is underway. | <b>10,</b><br><b>189</b>                                                          |
| How did you establish or decide who the international opinion leaders were? There are multiple methods of identifying opinion leaders.                                                                                                                                                                                                                                                                                                   | We identified Key Opinion Leaders via reviewer knowledge of published literature from previous SRs (DC, SD) and have added this to the methods.                                                                                                                                                                   | <b>11,</b><br><b>215</b>                                                          |
| For data extraction, suggest you first report the descriptive data extracted, and then introduce and describe the use of AGREE                                                                                                                                                                                                                                                                                                           | Thank you. Done.                                                                                                                                                                                                                                                                                                  | <b>12-</b><br><b>13</b>                                                           |
| Here you introduce a key element of data you extracted, the recommendations, and state that you assessed it as whole, partial or minimal.                                                                                                                                                                                                                                                                                                | We have revisited and clarified this. It is now "complete, partial or marginal focus of content/ recommendations."                                                                                                                                                                                                | <b>12,</b><br><b>238-</b><br><b>241</b>                                           |
| If you did examine guideline content in this way, then it should be recognized in the Introduction's purpose statement, and far more detail is needed to explain who did this work and if content was assessed independently, explain how the content was extracted (e.g. only bullet point recommendations) and                                                                                                                         | Thank you. We have added more detail. Data extraction of key recommendations was performed by two independent reviewers and was entirely straightforward for 11 CPGs. All six authors attempted to extract WPATH recommendations. We have re-written the introduction and clarified the data extraction of the    | <b>12,</b><br><b>230-</b><br><b>241</b><br><b>&amp;</b><br><b>Supl</b>            |



## International Clinical Practice Guidelines for Gender Minority/Trans People: Systematic Review

|                                                                                                                                                                                                                    |                                                                                                                                                                                                                                                                                                                                                                                                                                                                                                                                                                                                                                                                                                                                                                                                    |                                  |
|--------------------------------------------------------------------------------------------------------------------------------------------------------------------------------------------------------------------|----------------------------------------------------------------------------------------------------------------------------------------------------------------------------------------------------------------------------------------------------------------------------------------------------------------------------------------------------------------------------------------------------------------------------------------------------------------------------------------------------------------------------------------------------------------------------------------------------------------------------------------------------------------------------------------------------------------------------------------------------------------------------------------------------|----------------------------------|
| from where in the guideline, and define whole, partial and minimal and how that was assessed.                                                                                                                      | CPG recommendations (including an additional Table W5). We have changed the description to “complete, partial or marginal focus of content/ recommendations” (a post protocol interpretation having started inclusively).                                                                                                                                                                                                                                                                                                                                                                                                                                                                                                                                                                          |                                  |
| Outcomes section should follow data extraction for continuity, then conclude with Patient and Public Involvement.                                                                                                  | Thank you. The outcomes section now follows data extraction.                                                                                                                                                                                                                                                                                                                                                                                                                                                                                                                                                                                                                                                                                                                                       | <b>12</b>                        |
| Regarding Outcomes, the number of guidelines on this topic, while important, seems similarly important to the other outcomes; suggest you simply report outcomes without designating them as primary or secondary. | Thank you. Done. We agree, but outcomes had to be described like this for the PROSPERO webform.                                                                                                                                                                                                                                                                                                                                                                                                                                                                                                                                                                                                                                                                                                    | <b>12, 243-248</b>               |
| Regarding Patient and Public Involvement, it is not clear why they prioritised the AGREE domains, or what was done with this information.                                                                          | Thank you. We have clarified (as above, Reviewer 1 point 13) and made clearer in the text. AGREE II generates scores, but presently there are no data to link CPG scores with outcomes. At the start of the project, the team discussed how to set thresholds for “good quality”. The AGREE II instrument suggests consulting with relevant stakeholders (optional). We felt it would be appropriate to find what domains stakeholders place most value in, so created the prioritisation exercise. The investigating team also performed the same ranking task so we could compare groups. The results illustrated a difference in priorities. We made the decision not to impose quality thresholds, so as to not give more weight to our own views of “good quality” over that of stakeholders. | <b>13, 255-258</b>               |
| RESULTS. Use sub-headings: Search Results, Guideline Characteristics, and then a sub-heading for each outcome (i.e. whole, partial or minimal should be separate section pertaining to content and consistency)    | Thank you. We have added subheadings as suggested.                                                                                                                                                                                                                                                                                                                                                                                                                                                                                                                                                                                                                                                                                                                                                 | <b>14-24</b>                     |
| At this point, it's not clear why you compared domain prioritisation; it does not appear germane to the other outcomes; consider excluding                                                                         | Thank you. We now explain this in more detail. It is not an outcome in of itself, but a way to set a threshold for ‘good’ quality. After comparing domain prioritisation we decided not to set a threshold (as approved by Reviewer 3, one of the architects of AGREE II).                                                                                                                                                                                                                                                                                                                                                                                                                                                                                                                         | <b>13, 255-258 &amp; 14, 272</b> |
| The fact that you assessed consistency of recommendations and patient-facing material should be both mentioned and described in Methods                                                                            | These assessments were mentioned in the methods, but maybe not clearly enough. We have added further description.                                                                                                                                                                                                                                                                                                                                                                                                                                                                                                                                                                                                                                                                                  | <b>14, 235-238 &amp; 247-248</b> |
| DISCUSSION<br>Unclear what is meant by “it was impossible to reliably discern key...” because it's not evident what details of the Results this refers to.                                                         | We apologise for not being clear. We now expand on this in results. We have added Table W5 with all key, clearly discernable recommendations from the CPGs. Six reviewers independently extracted what they thought were key recommendations for WPATH. Our views ranged from 0 to 168 with very little agreement. We are happy to supply cross tabulations of all the statements extracted by the six reviewers, but hope the new description explains this better.                                                                                                                                                                                                                                                                                                                               | <b>23-24, 366-379 &amp; Supl</b> |
| This first paragraph, which is meant to briefly summarize key findings, omits some of study's findings With respect to implications, rather than reiterating key findings, choose two or                           | Thank you. We have improved the discussion in this way.                                                                                                                                                                                                                                                                                                                                                                                                                                                                                                                                                                                                                                                                                                                                            | <b>24 &amp; 26-</b>              |

## International Clinical Practice Guidelines for Gender Minority/Trans People: Systematic Review

|    |                                                                     |                                                                   |              |
|----|---------------------------------------------------------------------|-------------------------------------------------------------------|--------------|
| 1  |                                                                     |                                                                   |              |
| 2  |                                                                     |                                                                   |              |
| 3  | three key findings and elaborate on what could be done in           |                                                                   | <b>28</b>    |
| 4  | policy or practice to address or implement the findings, and        |                                                                   |              |
| 5  | draw on and reference relevant literature to support your           |                                                                   |              |
| 6  | recommendations                                                     |                                                                   |              |
| 7  | PRISMA. The figure requires editing as arrows are clearly           | Done.                                                             | Fig          |
| 8  | misplaced                                                           |                                                                   | 1            |
| 9  |                                                                     |                                                                   |              |
| 10 | <b>Reviewer 3: Gene Feder (Centre for Academic Primary</b>          |                                                                   |              |
| 11 | <b>Care, Bristol Medical School, University of Bristol)</b>         |                                                                   |              |
| 12 | This manuscript reports a comprehensive systematic review of        | Thank you.                                                        |              |
| 13 | (relatively) current international clinical guidelines that include |                                                                   |              |
| 14 | recommendations or standards for the care of trans/gender           |                                                                   |              |
| 15 | minority people. The reviewers have judged the quality of the       |                                                                   |              |
| 16 | 12 guidelines using the 6-domain AGREE II appraisal tool and        |                                                                   |              |
| 17 | consulting UK stakeholders about which of the AGREE II              |                                                                   |              |
| 18 | domains they prioritise.                                            |                                                                   |              |
| 19 | A major finding is that the scope of the guidelines is confined     | Thank you. We have added these clearly expressed points.          | <b>3,</b>    |
| 20 | to HIV/STI prevention or management of transition. The quality      |                                                                   | <b>61</b>    |
| 21 | scores have a wide range and heterogeneity and the reviewers        |                                                                   | <b>&amp;</b> |
| 22 | are wise not to specify quality score thresholds, although there    |                                                                   | <b>24,</b>   |
| 23 | is a pattern: guidelines that include recommendations about         |                                                                   | <b>387</b>   |
| 24 | HIV/STI are higher quality and those focusing on transition are     |                                                                   |              |
| 25 | lower quality.                                                      |                                                                   |              |
| 26 | The authors' discussion is consistent with their findings and       | Thank you.                                                        |              |
| 27 | their pitch for better quality, wider scope clinical practice       |                                                                   |              |
| 28 | guidelines for gender minority/Trans people is well made.           |                                                                   |              |
| 29 |                                                                     |                                                                   |              |
| 30 | Needless to say, clinical guidance around transition is             | Thank you. We have added this point about close attention to      | <b>25,</b>   |
| 31 | controversial. The close attention to avoidance of bias in this     | avoidance of bias into strengths. If published we feel this would | <b>395</b>   |
| 32 | systematic review (including exceeding the number of                | be a useful point for any press release.                          |              |
| 33 | independent reviewers recommended in the AGREE II                   |                                                                   |              |
| 34 | manual) is crucial in the current debate about the medical          |                                                                   |              |
| 35 | response to gender dysphoria/incongruence.                          |                                                                   |              |
| 36 | Unusually for me, I have no suggestions for improving the           | Thank you. We are very grateful for this positive review from one |              |
| 37 | manuscript. Not only is it well written, but it has been            | of the architects of AGREE II.                                    |              |
| 38 | forensically proof read.                                            |                                                                   |              |
| 39 | <b>Reviewer 4 (Yaolong Chen, Lanzhou University)</b>                |                                                                   |              |
| 40 |                                                                     |                                                                   |              |
| 41 | The authors evaluated CPGs for the assessment and health            | Thank you. We agree this is an interesting, current topic.        |              |
| 42 | care of gender minority/trans people. This is an interesting        |                                                                   |              |
| 43 | topic in recent years. The authors included twelve guidelines in    |                                                                   |              |
| 44 | their review. They concluded that there is a need to improve        |                                                                   |              |
| 45 | the quality of healthcare advice for gender minority/trans          |                                                                   |              |
| 46 | people by producing evidence-based, methodologically sound,         |                                                                   |              |
| 47 | independently assured guidance with better stakeholder              |                                                                   |              |
| 48 | involvement and informative patient-facing decision aids.           |                                                                   |              |
| 49 | Overall, this is a descriptive study with clear and well written.   | Thank you.                                                        |              |
| 50 | The authors followed the standard methods, including PRISMA         |                                                                   |              |
| 51 | checklist, flow diagram and registering with the PROSPERO           |                                                                   |              |
| 52 | platform.                                                           |                                                                   |              |
| 53 | However, the topic of the article is novel, but the content is      | Thank you. We agree the topic is novel. We believe there is       | <b>13</b>    |
| 54 | presented in much the same way as other evaluation                  | innovation which we have clarified in the manuscript: (1) the     | <b>255-</b>  |
| 55 | guidelines using AGREE II, with little innovation.                  | stakeholder prioritisation, (2) examining the content within the  | <b>260</b>   |
| 56 |                                                                     |                                                                   |              |
| 57 |                                                                     |                                                                   |              |
| 58 |                                                                     |                                                                   |              |
| 59 |                                                                     |                                                                   |              |
| 60 |                                                                     |                                                                   |              |

## International Clinical Practice Guidelines for Gender Minority/Trans People: Systematic Review

|                                                                                                                                                                                                                                                                                             |                                                                                                                                                                                                                                                                                                                                                                                                                                                                                                                                                                                                                                                                                                                                                                                                                                                                                                                                                                                                                                                                                                                                                                                                                                                                                                                                                                                                                                                                                                   |                           |
|---------------------------------------------------------------------------------------------------------------------------------------------------------------------------------------------------------------------------------------------------------------------------------------------|---------------------------------------------------------------------------------------------------------------------------------------------------------------------------------------------------------------------------------------------------------------------------------------------------------------------------------------------------------------------------------------------------------------------------------------------------------------------------------------------------------------------------------------------------------------------------------------------------------------------------------------------------------------------------------------------------------------------------------------------------------------------------------------------------------------------------------------------------------------------------------------------------------------------------------------------------------------------------------------------------------------------------------------------------------------------------------------------------------------------------------------------------------------------------------------------------------------------------------------------------------------------------------------------------------------------------------------------------------------------------------------------------------------------------------------------------------------------------------------------------|---------------------------|
|                                                                                                                                                                                                                                                                                             | guidelines (protocol aims 3-5) which we have highlighted more clearly through adding Tables W4 and W5.                                                                                                                                                                                                                                                                                                                                                                                                                                                                                                                                                                                                                                                                                                                                                                                                                                                                                                                                                                                                                                                                                                                                                                                                                                                                                                                                                                                            | & Supl                    |
| Major comments:<br>1. The first paragraph of the introduction is somewhat redundant. I think it is sufficient to state what the clinical practice guideline is and what its role is.                                                                                                        | We have rewritten the introduction                                                                                                                                                                                                                                                                                                                                                                                                                                                                                                                                                                                                                                                                                                                                                                                                                                                                                                                                                                                                                                                                                                                                                                                                                                                                                                                                                                                                                                                                | 6-9                       |
| 2. The authors do not state in the introduction section that it is not clear that the quality of current guidelines on gender minorities/trans people, there is therefore no mention of the necessity for this study.                                                                       | Thank you. We have mentioned "quality of current guidelines on gender minority/ trans health is unclear" thus justifying the necessity.                                                                                                                                                                                                                                                                                                                                                                                                                                                                                                                                                                                                                                                                                                                                                                                                                                                                                                                                                                                                                                                                                                                                                                                                                                                                                                                                                           | 8, 137                    |
| 3. The authors did not fully follow the research protocol registered at PROSPERO, e.g. search strategy.                                                                                                                                                                                     | We disagree. The search terms listed in the protocol were all used in the final search strategy, plus some additional terms. Therefore, the searches were improved. We have identified the minor protocol deviations more clearly.                                                                                                                                                                                                                                                                                                                                                                                                                                                                                                                                                                                                                                                                                                                                                                                                                                                                                                                                                                                                                                                                                                                                                                                                                                                                | 11, 213                   |
| 4. The authors did not follow their inclusion criteria. As stated in line 192, they would like to include the guidelines based on the review and assessment of available clinical evidence. However, in the guidelines they incorporated, I saw some guidelines without systematic reviews. | Thank you for the comment. We disagree. We did follow our inclusion criteria. We apologise if this was not clear and have added a point about variation in CPG definitions in the introduction to explain. The protocol did not insist upon CPGs having formal SRs. It states: "A clinical practice guideline (CPG) is defined as a <i>systematically developed set of recommendations</i> that assist practitioners and patients in the provision of healthcare in specific circumstances, produced <i>after review and assessment of available clinical evidence</i> . A CPG or part thereof, will be included if it fulfils all of the following criteria: <i>evidence-based with some documentation of the development methodology</i> "<br>Preliminary searches showed a paucity of SRs in the field. In addition, some CPGs used a mixture of SRs and expert consensus. We wished to be inclusive. Thus, the definition we used was not reliant on CPGs being informed by an SR. The documents needed to include some sort of methodology and linkage to evidence: i.e. the recommendations needed to be <i>systematically developed</i> . This could have been getting a panel of experts together (e.g. Ralph), having discussions or voting systems, together searching the literature (perhaps in different sub-sections / subgroup in CPG development committee). We were disappointed to find that so few guidelines had SRs. We have emphasised this finding more in the discussion. | 6, 98 & 10, 182 & 24, 387 |
| 5. The authors did not state in the purpose that the analysis and comparison of the recommendations are to be made, but they did in the results section.                                                                                                                                    | Thank you. We did mention this but maybe not clearly enough. We have emphasised it better in the methods.                                                                                                                                                                                                                                                                                                                                                                                                                                                                                                                                                                                                                                                                                                                                                                                                                                                                                                                                                                                                                                                                                                                                                                                                                                                                                                                                                                                         | 12, 235, 247              |
| Minor comments:<br>-Abstract<br><input type="checkbox"/> Line 90, six lower-quality CPGs concerned transition-specific interventions (overall assessment scores 11-56%)... I can't find this result from the Results section.                                                               | Thank you. We had tried to avoid repetition between text and tables in results. We have now added the overall assessment scores to the text of the results (figures are found Table 2).                                                                                                                                                                                                                                                                                                                                                                                                                                                                                                                                                                                                                                                                                                                                                                                                                                                                                                                                                                                                                                                                                                                                                                                                                                                                                                           | 19, 328                   |
| -Introduction<br><input type="checkbox"/> It is recommended that some of the well-known knowledge of clinical practice guidelines be removed from the background section                                                                                                                    | Thank you. Other peer reviewers suggested more discussion about quality assessment. We have rewritten the introduction and removed some well-known knowledge of CPGs.                                                                                                                                                                                                                                                                                                                                                                                                                                                                                                                                                                                                                                                                                                                                                                                                                                                                                                                                                                                                                                                                                                                                                                                                                                                                                                                             | 6-9                       |

## International Clinical Practice Guidelines for Gender Minority/Trans People: Systematic Review

|    |                                                                                                                                                                                                                                                                                                                                                                                                                                                  |                                                                                                                                                                                                                                                                                                                  |                |
|----|--------------------------------------------------------------------------------------------------------------------------------------------------------------------------------------------------------------------------------------------------------------------------------------------------------------------------------------------------------------------------------------------------------------------------------------------------|------------------------------------------------------------------------------------------------------------------------------------------------------------------------------------------------------------------------------------------------------------------------------------------------------------------|----------------|
| 3  | -Methods                                                                                                                                                                                                                                                                                                                                                                                                                                         | Thank you. We confirm this was a mistake. We should have written Google in the protocol. We wanted to use this search engine to identify potential CPGs in the grey, not scholarly literature. We have added explanatory text.                                                                                   | 11, 211-213    |
| 4  | <input type="checkbox"/> Line 213, a clear description of whether it's Google or google scholar because on PROSPERO it's google scholar                                                                                                                                                                                                                                                                                                          |                                                                                                                                                                                                                                                                                                                  |                |
| 5  | <input type="checkbox"/> Line 214 the fact that NGC has been shut down in 2017, how do you get guidelines from NGC?                                                                                                                                                                                                                                                                                                                              | Thank you. We explain that CM manually examined the AHRQ national guidelines clearinghouse archive that remains in the internet (not maintained since 2017)                                                                                                                                                      | 11, 208        |
| 6  | <input type="checkbox"/> Line 218 the journals searched are listed here, but there are no instructions on the PROSPERO                                                                                                                                                                                                                                                                                                                           | Thank you. This search was added after registration. We have noted this in the methods.                                                                                                                                                                                                                          | 11, 209        |
| 7  | <input type="checkbox"/> Line 248 how overall quality is evaluated and calculated                                                                                                                                                                                                                                                                                                                                                                | We have added information to methods about how the AGREE II tool works.                                                                                                                                                                                                                                          | 9, 166-174     |
| 8  | -Results                                                                                                                                                                                                                                                                                                                                                                                                                                         | Thank you. We have corrected the typographical error.                                                                                                                                                                                                                                                            | 14, 279        |
| 9  | <input type="checkbox"/> Line 283, 1781 citations were identified... however in Figure 1, 1787 citations were identified, please check which one is correct.                                                                                                                                                                                                                                                                                     |                                                                                                                                                                                                                                                                                                                  |                |
| 10 | <input type="checkbox"/> Line 303-306, the authors give a range of scores for each domain, suggesting that an average score for each domain can be given for all guidelines.                                                                                                                                                                                                                                                                     | The range is derived from Table 2. Scores are calculated by the AGREE II instrument for each CPG. The range was mentioned to give an illustration of the wide variation in scores, rather than suggest domain averages could/ should be calculated across the guidelines. We have altered the accompanying text. | 19-20, 328-340 |
| 11 | -Discussion                                                                                                                                                                                                                                                                                                                                                                                                                                      | We focused on the implications for the NHS. We are less confident speculating about implications for high versus low and middle income countries, but have added some points for other countries in discussion.                                                                                                  | 27, 457-461    |
| 12 | <input type="checkbox"/> Line 384, What are the potential implications of this study for high-income countries and low- and middle-income countries, respectively? Could you discuss this?                                                                                                                                                                                                                                                       |                                                                                                                                                                                                                                                                                                                  |                |
| 13 | <input type="checkbox"/> Line 416, please add the full name when it first appears, including NICE SIGN MAGIC.                                                                                                                                                                                                                                                                                                                                    | Done.                                                                                                                                                                                                                                                                                                            | 8, 148         |
| 14 | -Figure and tables                                                                                                                                                                                                                                                                                                                                                                                                                               | Done.                                                                                                                                                                                                                                                                                                            | Fig 1          |
| 15 | <input type="checkbox"/> The lines in Figure 1 are messy, please save it to a non-editable format.                                                                                                                                                                                                                                                                                                                                               |                                                                                                                                                                                                                                                                                                                  |                |
| 16 | <input type="checkbox"/> Please add the full name of the abbreviation below Figure 1.                                                                                                                                                                                                                                                                                                                                                            | Done.                                                                                                                                                                                                                                                                                                            | Fig 1          |
| 17 | - Supplementary materials                                                                                                                                                                                                                                                                                                                                                                                                                        | Thank you. Inclusions were 2010 onwards so the searches would have picked up everything relevant.                                                                                                                                                                                                                | Supl           |
| 18 | <input type="checkbox"/> Page 40, line 17, as stated in the search strategy, the search start date is January 1, 2010, so why start with 2008 here?                                                                                                                                                                                                                                                                                              |                                                                                                                                                                                                                                                                                                                  |                |
| 19 | <input type="checkbox"/> Page 40, line 30, as I know, in MEDLINE, CPG has three MeSH words, ie, guideline, practice guideline and guideline as topic.                                                                                                                                                                                                                                                                                            | The search terms we used incorporated all of these.                                                                                                                                                                                                                                                              |                |
| 20 | <b>Reviewer 5 (Emma Rush, patient reviewer)</b>                                                                                                                                                                                                                                                                                                                                                                                                  |                                                                                                                                                                                                                                                                                                                  |                |
| 21 | Are the issues identified relevant and important to patients and/or carers?                                                                                                                                                                                                                                                                                                                                                                      | Thank you. We have clarified the aim as 'healthcare of gender minority/trans people' as we wanted to capture everything. We do not want to split matters as if there was a simple, linear, two-stages of assessment and then ongoing healthcare.                                                                 | 3, 45 & 9, 158 |
| 22 | This paper is a systematic review, and its objective is identified as being: To identify and critically appraise published international clinical practice guidelines (CPGs) for the assessment and health care of gender minority/trans people. At the outset the expectation is therefore wide-ranging, and that the review will cover two stages, the assessment process and then the ongoing health care of gender minority or trans people. |                                                                                                                                                                                                                                                                                                                  |                |

## International Clinical Practice Guidelines for Gender Minority/Trans People: Systematic Review

|                                                                                                                                                                                                                                                                                                                                                                                                                                                                                                                                                                                                                                                                                                                                                                                                                                                                                                                        |                                                                                                                                                                                                                                                                                                                                                                                                                                                                                                                                                                                                                                                       |                                                                                                      |
|------------------------------------------------------------------------------------------------------------------------------------------------------------------------------------------------------------------------------------------------------------------------------------------------------------------------------------------------------------------------------------------------------------------------------------------------------------------------------------------------------------------------------------------------------------------------------------------------------------------------------------------------------------------------------------------------------------------------------------------------------------------------------------------------------------------------------------------------------------------------------------------------------------------------|-------------------------------------------------------------------------------------------------------------------------------------------------------------------------------------------------------------------------------------------------------------------------------------------------------------------------------------------------------------------------------------------------------------------------------------------------------------------------------------------------------------------------------------------------------------------------------------------------------------------------------------------------------|------------------------------------------------------------------------------------------------------|
| <p>3 It goes on (I 95) to recognise a lack of 'high- quality guidance, especially relating to mortality, quality of life, sizes of benefits and harms, and patient facing material'</p>                                                                                                                                                                                                                                                                                                                                                                                                                                                                                                                                                                                                                                                                                                                                | <p>We agree.</p>                                                                                                                                                                                                                                                                                                                                                                                                                                                                                                                                                                                                                                      |                                                                                                      |
| <p>7 Many patients and carers are, certainly in the UK, aware of this lack and a focused approach to throughout-life health care and as volumes of patients within the NHS increases there is a real need for some consistent guidance to clinicians across specialisms on the specific risks to, and means of addressing and treating the gender minority /trans population.</p>                                                                                                                                                                                                                                                                                                                                                                                                                                                                                                                                      | <p>Thank you. We have added this point to the discussion, as it is also an equity issue.</p>                                                                                                                                                                                                                                                                                                                                                                                                                                                                                                                                                          | <p><b>28,</b><br/>469-<br/>471</p>                                                                   |
| <p>13 From a patient's point of view, referring to participants as 'trans identifying' is misplaced (page 4/page 10). The point about being trans for many people is that that is their identity it's not a transient state in which they 'identify as' and adding 'identifying' questions the authenticity of their experience. They are trans. I recommend that the reference throughout is to 'trans people' not 'trans identifying.'</p>                                                                                                                                                                                                                                                                                                                                                                                                                                                                           | <p>Thank you. We have removed 'identifying.'</p>                                                                                                                                                                                                                                                                                                                                                                                                                                                                                                                                                                                                      |                                                                                                      |
| <p>20 Do you think the level of patient/carer involvement in the study could have been improved? If there was none do you have ideas on how they might have done so?<br/>Reference is made (page 13   262) to fifty-two stakeholder groups being consulted about the prioritisation exercise for the AGREE domains. It isn't clear whether that exercise went out beyond the groups to the patients they might represent and may be worth clarifying briefly, perhaps by noting the number of responses to the SurveyMonkey questionnaire here in the text of the review.</p>                                                                                                                                                                                                                                                                                                                                          | <p>Thank you. We had 19/52 replies (a 39% response rate) which we report and believe is a good, and typical, response to a query of this sort. We do not know if the link was circulated further to any groups we had not identified.</p>                                                                                                                                                                                                                                                                                                                                                                                                             | <p><b>19,</b><br/>324</p>                                                                            |
| <p>31 . It would also be interesting to compare and contrast in the text (even if briefly) the different priorities in Table W2, to involve patients/ patient representatives further in the text.</p>                                                                                                                                                                                                                                                                                                                                                                                                                                                                                                                                                                                                                                                                                                                 | <p>Thank you. We did mention this but as the stakeholder/rigour of development quality scores tended to be high or low hand-in-hand, we felt it was stronger to mention the absence of patient facing material before starting the discussion. We think the absence of patients/ patients' representatives is highlighted. We have added a patient implications section to the discussion, highlighting the need for stakeholder involvement. We did not go further in terms of patient/ carer involvement. The work was first presented at WPATH (November 2020). We intend to report to the stakeholder organisations as part of dissemination.</p> | <p><b>24,</b><br/>381<br/>&amp;<br/><b>19,</b><br/>333<br/>&amp;<br/><b>28,</b><br/>463-<br/>474</p> |
| <p>42 Is the treatment or intervention suggested or guidance given something which patients/carers can readily take up? or does it present challenges?<br/>It would be interesting, even though this is a systematic review rather than description of a treatment or intervention, to encourage current trans / gender minority patients who might be in the NHS system within the UK to contribute where they are comfortable to do so to any research being undertaken by their clinicians. Reference is made to RCTs and long term observational studies on page 21 and perhaps one of the needs for these to be a success, and to contribute data for the future health of trans /gender minority patients is to use this paper as a positive call to contribute to patients and stakeholders. If CPGs don't exist because there is insufficient data, the new generation of patients coming into the NHS are</p> | <p>Thank you. We agree with these points that have been added to the discussion.</p>                                                                                                                                                                                                                                                                                                                                                                                                                                                                                                                                                                  | <p><b>28,</b><br/>463-<br/>474</p>                                                                   |

## International Clinical Practice Guidelines for Gender Minority/Trans People: Systematic Review

|    |                                                                     |                                                                                                                                                                                                                                                                                                                                                                                                                                                                                                                                                                                                                                                                                  |                           |
|----|---------------------------------------------------------------------|----------------------------------------------------------------------------------------------------------------------------------------------------------------------------------------------------------------------------------------------------------------------------------------------------------------------------------------------------------------------------------------------------------------------------------------------------------------------------------------------------------------------------------------------------------------------------------------------------------------------------------------------------------------------------------|---------------------------|
| 3  | those who can contribute to the future of this field of medicine.   |                                                                                                                                                                                                                                                                                                                                                                                                                                                                                                                                                                                                                                                                                  |                           |
| 4  | Individual queries:                                                 |                                                                                                                                                                                                                                                                                                                                                                                                                                                                                                                                                                                                                                                                                  |                           |
| 5  | Page 8Ls 136 -138 Why was this this definition of trans people      | Thank you. We appreciate that other definitions exist, and terminology develops rapidly (including for various medical words/ concepts associated with CPGs for gender minority/ trans health). Stakeholder groups were not consulted on the definition. It was developed with reference to WHO, the highest international health body, to communicate concepts to a generalist, global, predominantly medical audience who may not understand terms like gender identity/ gender expression, or define them the same way across languages/ local contexts/ cultural understandings. As the main readership is clinical, a unifying, somewhat medical definition seemed prudent. |                           |
| 6  | chosen over more recent, stakeholder-driven definitions? Were       |                                                                                                                                                                                                                                                                                                                                                                                                                                                                                                                                                                                                                                                                                  |                           |
| 7  | stakeholder groups consulted on the use of this definition?         |                                                                                                                                                                                                                                                                                                                                                                                                                                                                                                                                                                                                                                                                                  |                           |
| 8  |                                                                     |                                                                                                                                                                                                                                                                                                                                                                                                                                                                                                                                                                                                                                                                                  |                           |
| 9  |                                                                     |                                                                                                                                                                                                                                                                                                                                                                                                                                                                                                                                                                                                                                                                                  |                           |
| 10 |                                                                     |                                                                                                                                                                                                                                                                                                                                                                                                                                                                                                                                                                                                                                                                                  |                           |
| 11 |                                                                     |                                                                                                                                                                                                                                                                                                                                                                                                                                                                                                                                                                                                                                                                                  |                           |
| 12 |                                                                     |                                                                                                                                                                                                                                                                                                                                                                                                                                                                                                                                                                                                                                                                                  |                           |
| 13 |                                                                     |                                                                                                                                                                                                                                                                                                                                                                                                                                                                                                                                                                                                                                                                                  |                           |
| 14 |                                                                     |                                                                                                                                                                                                                                                                                                                                                                                                                                                                                                                                                                                                                                                                                  |                           |
| 15 |                                                                     |                                                                                                                                                                                                                                                                                                                                                                                                                                                                                                                                                                                                                                                                                  |                           |
| 16 | L 151 It would be useful to quote figures here – for example        | Thank you, we have rewritten the introduction. We believe the article is long enough without focusing on young people, as all adult gender minority/trans people who transition medically will also require continuing care. Putting results into context might be the focus of an accompanying editorial (e.g. maybe by a Professor of General Practice, such as Reviewer 3).                                                                                                                                                                                                                                                                                                   | <b>6-9</b>                |
| 17 | The Tavistock provides figures for the increase in referrals to     |                                                                                                                                                                                                                                                                                                                                                                                                                                                                                                                                                                                                                                                                                  |                           |
| 18 | their service for young people, which might show the number         |                                                                                                                                                                                                                                                                                                                                                                                                                                                                                                                                                                                                                                                                                  |                           |
| 19 | of people presenting at the beginning of their health care lives    |                                                                                                                                                                                                                                                                                                                                                                                                                                                                                                                                                                                                                                                                                  |                           |
| 20 | who will subsequently require ongoing primary and secondary         |                                                                                                                                                                                                                                                                                                                                                                                                                                                                                                                                                                                                                                                                                  |                           |
| 21 | care.                                                               |                                                                                                                                                                                                                                                                                                                                                                                                                                                                                                                                                                                                                                                                                  |                           |
| 22 | Page 9 The reported poor population health and difficulties         | We have removed the statement. It was intended to sum up the preceding referenced points about access and health risks.                                                                                                                                                                                                                                                                                                                                                                                                                                                                                                                                                          |                           |
| 23 | with accessing appropriate healthcare. Where is the reference       |                                                                                                                                                                                                                                                                                                                                                                                                                                                                                                                                                                                                                                                                                  |                           |
| 24 | for this statement please?                                          |                                                                                                                                                                                                                                                                                                                                                                                                                                                                                                                                                                                                                                                                                  |                           |
| 25 | Page 17   352 what is snowballing?                                  | Removed.                                                                                                                                                                                                                                                                                                                                                                                                                                                                                                                                                                                                                                                                         |                           |
| 26 | Page 17   336                                                       | We agree this must be a priority in future CPGs, especially as it was a stakeholder priority. We had made this point but maybe not well enough. We have added implications for patients to discussion.                                                                                                                                                                                                                                                                                                                                                                                                                                                                           | <b>28,</b><br>463-<br>474 |
| 27 | Can a conclusion or recommendation be drawn from this, for          |                                                                                                                                                                                                                                                                                                                                                                                                                                                                                                                                                                                                                                                                                  |                           |
| 28 | example that this, given that it was a stakeholder priority must    |                                                                                                                                                                                                                                                                                                                                                                                                                                                                                                                                                                                                                                                                                  |                           |
| 29 | be a priority for future CPGs in this area?                         |                                                                                                                                                                                                                                                                                                                                                                                                                                                                                                                                                                                                                                                                                  |                           |
| 30 | Page 20 Meaning of the study: possible explanations and             | Thank you. We have rewritten this, subdividing the implications, and included patients.                                                                                                                                                                                                                                                                                                                                                                                                                                                                                                                                                                                          | <b>28,</b><br>463-<br>474 |
| 31 | implications for clinicians and policymakers                        |                                                                                                                                                                                                                                                                                                                                                                                                                                                                                                                                                                                                                                                                                  |                           |
| 32 | This paragraph to line 405 is confusing to read.It would be         |                                                                                                                                                                                                                                                                                                                                                                                                                                                                                                                                                                                                                                                                                  |                           |
| 33 | easier if key findings were in headed paragraphs relating to        |                                                                                                                                                                                                                                                                                                                                                                                                                                                                                                                                                                                                                                                                                  |                           |
| 34 | Clinicians; Policymakers and Patients with an overall               |                                                                                                                                                                                                                                                                                                                                                                                                                                                                                                                                                                                                                                                                                  |                           |
| 35 | conclusion at the end.                                              |                                                                                                                                                                                                                                                                                                                                                                                                                                                                                                                                                                                                                                                                                  |                           |
| 36 | Line 405 – what does ‘further develop a learning culture            | Thank you. We have removed this comment. Patients should have individualised plans. However, doctors are obliged not to experiment on a case-by-case trial; they should work in teams and test their treatments, both generating and following evidence. Otherwise they may be doing more (long term) harm than they realise from their (short term) grateful patients. We have not expanded on ethics, nor referenced the 2020 Cumberlege report, but these might be covered in an accompanying commentary.                                                                                                                                                                     |                           |
| 37 | beyond empiricism’ mean? That clinicians should not try things      |                                                                                                                                                                                                                                                                                                                                                                                                                                                                                                                                                                                                                                                                                  |                           |
| 38 | out with patients on a case by case basis and base patient          |                                                                                                                                                                                                                                                                                                                                                                                                                                                                                                                                                                                                                                                                                  |                           |
| 39 | treatment exclusively on evidence or CPGs where they exist?         |                                                                                                                                                                                                                                                                                                                                                                                                                                                                                                                                                                                                                                                                                  |                           |
| 40 |                                                                     |                                                                                                                                                                                                                                                                                                                                                                                                                                                                                                                                                                                                                                                                                  |                           |
| 41 |                                                                     |                                                                                                                                                                                                                                                                                                                                                                                                                                                                                                                                                                                                                                                                                  |                           |
| 42 |                                                                     |                                                                                                                                                                                                                                                                                                                                                                                                                                                                                                                                                                                                                                                                                  |                           |
| 43 |                                                                     |                                                                                                                                                                                                                                                                                                                                                                                                                                                                                                                                                                                                                                                                                  |                           |
| 44 |                                                                     |                                                                                                                                                                                                                                                                                                                                                                                                                                                                                                                                                                                                                                                                                  |                           |
| 45 |                                                                     |                                                                                                                                                                                                                                                                                                                                                                                                                                                                                                                                                                                                                                                                                  |                           |
| 46 |                                                                     |                                                                                                                                                                                                                                                                                                                                                                                                                                                                                                                                                                                                                                                                                  |                           |
| 47 | Surely one of the difficulties in this field of health care is that | Thank you for this point. The authority gained from working in a field for a long time (especially where definitions, diagnoses and numbers appear to be in flux) does not guarantee a doctor is doing good, or continuing to do good. Understandings and standards might change. If clinicians come in anew, it is even more important to have high quality CPGs.                                                                                                                                                                                                                                                                                                               |                           |
| 48 | each case presents as new to the clinician with many clinicians     |                                                                                                                                                                                                                                                                                                                                                                                                                                                                                                                                                                                                                                                                                  |                           |
| 49 | recruited into the field from others, rather than having the        |                                                                                                                                                                                                                                                                                                                                                                                                                                                                                                                                                                                                                                                                                  |                           |
| 50 | privilege of spending their entire working careers in this area of  |                                                                                                                                                                                                                                                                                                                                                                                                                                                                                                                                                                                                                                                                                  |                           |
| 51 | medicine.                                                           |                                                                                                                                                                                                                                                                                                                                                                                                                                                                                                                                                                                                                                                                                  |                           |
| 52 |                                                                     |                                                                                                                                                                                                                                                                                                                                                                                                                                                                                                                                                                                                                                                                                  |                           |
| 53 | Page 21 Conclusion                                                  | Thank you. We find this is a good point, and something to work with the community/ stakeholders in a positive way. We have added this recommendation.                                                                                                                                                                                                                                                                                                                                                                                                                                                                                                                            | <b>29,</b><br>490         |
| 54 | I feel patients would benefit from seeing this final conclusion     |                                                                                                                                                                                                                                                                                                                                                                                                                                                                                                                                                                                                                                                                                  |                           |
| 55 | include a recommendation here, even in simple terms such as         |                                                                                                                                                                                                                                                                                                                                                                                                                                                                                                                                                                                                                                                                                  |                           |
| 56 |                                                                     |                                                                                                                                                                                                                                                                                                                                                                                                                                                                                                                                                                                                                                                                                  |                           |

## International Clinical Practice Guidelines for Gender Minority/Trans People: Systematic Review

1  
2  
3  
4  
5  
6  
7  
8  
9  
10  
11  
12  
13  
14  
15  
16  
17  
18  
19  
20  
21  
22  
23  
24  
25  
26  
27  
28  
29  
30  
31  
32  
33  
34  
35  
36  
37  
38  
39  
40  
41  
42  
43  
44  
45  
46  
47  
48  
49  
50  
51  
52  
53  
54  
55  
56  
57  
58  
59  
60

|                                                                                                                                                                                                                                                                                                                                                                     |                                                                                                                                                                                                                                                                                                                                                                                                                  |            |
|---------------------------------------------------------------------------------------------------------------------------------------------------------------------------------------------------------------------------------------------------------------------------------------------------------------------------------------------------------------------|------------------------------------------------------------------------------------------------------------------------------------------------------------------------------------------------------------------------------------------------------------------------------------------------------------------------------------------------------------------------------------------------------------------|------------|
| the need for further evidence-based work to take place in preparing CPGs that cover the gender minority/trans person's holistic care.                                                                                                                                                                                                                               |                                                                                                                                                                                                                                                                                                                                                                                                                  |            |
| The conclusion on page 5 is much clearer and a great call to action.                                                                                                                                                                                                                                                                                                | Thank you.                                                                                                                                                                                                                                                                                                                                                                                                       |            |
| Overall, can I please ask, is the recommendation that specific CPGs for trans care should be improved across the different aspects of an individual's healthcare, or that in all CPGs, for example in disease-specific guidance, trans care should become an element of that guidance?                                                                              | Thank you for this good question. It is not an either/or call to action, but ideally both: (1) CPG producers creating transition-related or trans health focussed recommendations ought to improve quality, and (2) CPG developers across healthcare ought to consider whether trans patients may have unique needs (NICE does this with Equality Impact Assessments). We have clarified this in the conclusion. | 29, 490    |
| <b>Reviewer 6 (Vivienne Bachelet, Universidad de Santiago de Chile)</b>                                                                                                                                                                                                                                                                                             |                                                                                                                                                                                                                                                                                                                                                                                                                  |            |
| I appreciate the opportunity that the journal has given me to review this paper. I find this systematic review of CPGs for gender minority and trans people an interesting and important research project, and the results should be published.                                                                                                                     | Thank you. We agree that it's interesting, important and should be published.                                                                                                                                                                                                                                                                                                                                    |            |
| My main recommendation is to cut as much as possible unnecessary references. For some reason, medical writing has lost its flow—each statement having to be supported by "evidence," which is pretty arbitrary, and, while I recognize that journals and editors may be responsible, it does not make it into good writing. Remember David Sackett's writing style? | We are grateful for this suggestion to improve writing style. We have cut references, although there were additional suggestions and sources recommended by other peer reviewers.                                                                                                                                                                                                                                |            |
| Introduction<br>I find the way the first paragraph is written sounds too mechanical. There are way too many references not needed for obvious things. Please write this out with your own words to make reading pleasant, and cut some references                                                                                                                   | Thank you. We have rewritten the introduction.                                                                                                                                                                                                                                                                                                                                                                   | 6-9        |
| The point to be established is that CPGs are important and have limitations. A couple of references to the SRs are enough.                                                                                                                                                                                                                                          | Thank you. We have made this point.                                                                                                                                                                                                                                                                                                                                                                              | 6, 99      |
| In the following paragraphs, I would recommend using references only to support quantitative statements (e.g., pg 10, lines 157 to 163) and important ideas that are not your own. For minor, tangential statements that are pretty much common knowledge, there is no need for supportive references.                                                              | Thank you. We have removed some references but added others.                                                                                                                                                                                                                                                                                                                                                     |            |
| Another style suggestion is to bring together sentences so that reading is made more effortless (e.g., pg 10, line 170 to 172 where a connector is warranted).                                                                                                                                                                                                      | Thank you. We have tried to make reading more effortless.                                                                                                                                                                                                                                                                                                                                                        |            |
| The remark on AGREE II in pg 10, lines 175 to 179, seems out of place here. I think it should be introduced before zooming into CPG in your population of interest and their critical appraisal. Maybe change the order of the ideas...just a thought.                                                                                                              | Thank you. We have changed the order to introduce AGREE II before population of interest.                                                                                                                                                                                                                                                                                                                        | 6, 111     |
| Furthermore, I would be interested in knowing a bit more about why there are reservations (reference 37). Is the mention of WPATH necessary for this review? If it is, then this notion should be developed further, including the potential critique. Remember, many of the readers, like myself, are not experts                                                  | Thank you. We have explained why WPATH is of central importance, explained existing critiques and why its quality might have implications for practicing professionals globally.                                                                                                                                                                                                                                 | 8, 140-143 |

## International Clinical Practice Guidelines for Gender Minority/Trans People: Systematic Review

|                                                                                                                                                                                                                                                                                                                                                                                                                                                                                                                                              |                                                                                                                                                                                                                                                                                                                                                                                                                                                                                                                                                                                                                                                                          |                                                                                        |
|----------------------------------------------------------------------------------------------------------------------------------------------------------------------------------------------------------------------------------------------------------------------------------------------------------------------------------------------------------------------------------------------------------------------------------------------------------------------------------------------------------------------------------------------|--------------------------------------------------------------------------------------------------------------------------------------------------------------------------------------------------------------------------------------------------------------------------------------------------------------------------------------------------------------------------------------------------------------------------------------------------------------------------------------------------------------------------------------------------------------------------------------------------------------------------------------------------------------------------|----------------------------------------------------------------------------------------|
| in transgender issues. More likely, we know nothing and look forward to reading your paper to introduce ourselves to the topic. It WPATH is not essential, then delete this whole concept. You are the experts.                                                                                                                                                                                                                                                                                                                              |                                                                                                                                                                                                                                                                                                                                                                                                                                                                                                                                                                                                                                                                          |                                                                                        |
| Methods<br>Pg 11, line 193: Why does the eligible population of CPG begin after January 1st 2010? Repeat mention in line 106 but no explanation.                                                                                                                                                                                                                                                                                                                                                                                             | Thank you. We have added the rationale. We wanted to focus on the current landscape. A five year restriction would have excluded WPATH SoCv7 (2011) which would have been detrimental. Further back, CPGs might have been out of date. The paper is timelier as updating for WPATH SoCv8 is underway.                                                                                                                                                                                                                                                                                                                                                                    | <b>10,</b><br><b>189</b>                                                               |
| On the search: Why did you not include LILACS in your databases? Not that I think that it will make much of a difference, but systematic is systematic.                                                                                                                                                                                                                                                                                                                                                                                      | Thank you. We have added this database that was overlooked at protocol stage although no more full papers were found.                                                                                                                                                                                                                                                                                                                                                                                                                                                                                                                                                    | <b>11,</b><br><b>203</b><br>&<br><b>Fig</b><br><b>1</b>                                |
| Pg 14, line 266, please explain that the link leads to the survey.                                                                                                                                                                                                                                                                                                                                                                                                                                                                           | Done.                                                                                                                                                                                                                                                                                                                                                                                                                                                                                                                                                                                                                                                                    | <b>13,</b><br><b>267</b>                                                               |
| On the survey, and considering that in the discussion section you say that one of the strengths of the study was "snowballing," please explain in the methods section how you used this sampling method, or, better yet, whether this was the sampling strategy done (it appears not). I seem to understand from your paper that you just contacted as many stakeholders as possible because you do not provide a report on your sampling strategy for the key opinion leaders. You only say you "approached" them (pg 11, line 223 to 224). | Thank you, we have explained this better in methods. There were two separate exercises: (1) for international key opinion leaders, identified through published works, one email invitation & reminder. DC has good knowledge of the field having previously done SRs on gender minority/ trans health; (2) for stakeholder prioritisation, identified through local knowledge and Googling by the whole team, two emails with a link to the survey. Although we invited recipients to pass invitations onto their networks, we agree 'snowballing' (sampling) is wrong, so the term is now deleted.                                                                     | <b>11,</b><br><b>215</b><br>&<br><b>13,</b><br><b>262</b>                              |
| Furthermore, the word "snowballing" has an entirely different meaning that you do not want to include in your paper (for more, Google).                                                                                                                                                                                                                                                                                                                                                                                                      | We agree. The term has been removed.                                                                                                                                                                                                                                                                                                                                                                                                                                                                                                                                                                                                                                     |                                                                                        |
| Results<br>Pg 17, lines 331 to 334. I understand that the WPATH guidelines may have been cryptic or confusing. Is that it? I do not understand this: "After discussion, it was decided not to revisit inclusions post hoc but to abandon this protocol aim." So, it appears something is going on with WPATH, but I do not know what from reading your paper...I am intrigued, in any case. Maybe their recommendations are not a CPG but just a laundry list of things to do or to not do? Who knows...this is not my field.                | Thank you. We have clarified the difficulty in results. We believe that WPATH SoCv7 is a CPG: it certainly presents itself as such (or evidence-based 'standards of care'), but the problem is that there are no clear key recommendations. Nor are there clear standards against which an individual or service could compare themselves. There is a lot of 'flexibility,' which on closer inspection becomes incoherent. Thus the document is not even a 'laundry list' (as you suggest). Between the six of us we could not identify the 'list'. This should be easy to fix, if WPATH would issue v8 with a 'key recommendations' section as we advise in discussion. | <b>23-</b><br><b>24,</b><br><b>367-</b><br><b>379</b><br>&<br><b>27,</b><br><b>446</b> |
| Discussion. Please delete your mention of "snowballing." You did not conduct snowball sampling for this study.                                                                                                                                                                                                                                                                                                                                                                                                                               | Done.                                                                                                                                                                                                                                                                                                                                                                                                                                                                                                                                                                                                                                                                    |                                                                                        |
| An explanation was found for the WPATH controversy! I correctly second-guessed the underlying issue when reading the previous sections.                                                                                                                                                                                                                                                                                                                                                                                                      | We apologise for the reviewer's difficulty. The preceding sections are now clearer with extra explanation in the text and Table W5 (CPG key recommendations) which will inform readers better.                                                                                                                                                                                                                                                                                                                                                                                                                                                                           | <b>23-</b><br><b>24,</b><br><b>367-</b><br><b>379</b><br>&<br><b>Supl</b>              |
| Once again, please go through your writing style, and cut                                                                                                                                                                                                                                                                                                                                                                                                                                                                                    | Thank you. We may have overdone the references because we                                                                                                                                                                                                                                                                                                                                                                                                                                                                                                                                                                                                                |                                                                                        |



## International Clinical Practice Guidelines for Gender Minority/Trans People: Systematic Review

|                                                                                                                                                                                                                                                                                                                                                        |                                                                                                                                                                                                                                                                                                                                                                                                                                                                                                                                                                                                                                                                                                                                                                                                                                                                                                                                                                                                                                                                       |                                   |
|--------------------------------------------------------------------------------------------------------------------------------------------------------------------------------------------------------------------------------------------------------------------------------------------------------------------------------------------------------|-----------------------------------------------------------------------------------------------------------------------------------------------------------------------------------------------------------------------------------------------------------------------------------------------------------------------------------------------------------------------------------------------------------------------------------------------------------------------------------------------------------------------------------------------------------------------------------------------------------------------------------------------------------------------------------------------------------------------------------------------------------------------------------------------------------------------------------------------------------------------------------------------------------------------------------------------------------------------------------------------------------------------------------------------------------------------|-----------------------------------|
| unnecessary references.                                                                                                                                                                                                                                                                                                                                | are conscious of sensitivities in this area of research. We have removed many. We are happy to prune more knowing we can supply them if asked.                                                                                                                                                                                                                                                                                                                                                                                                                                                                                                                                                                                                                                                                                                                                                                                                                                                                                                                        |                                   |
| Conclusion. The first sentence does not stem from the results as it is a declaration of desirability. The second sentence rings true after reading your report, but a one-sentence conclusion section seems insufficient. I would drop this section altogether and take the “underserved” concept to the latter part of the discussion.                | Thank you. We have reworded this section.                                                                                                                                                                                                                                                                                                                                                                                                                                                                                                                                                                                                                                                                                                                                                                                                                                                                                                                                                                                                                             | <b>29, 487</b>                    |
| Minor observations<br>Pg 8, line 120 Awkward wording (including by reducing between-clinician variation).                                                                                                                                                                                                                                              | Reworded.                                                                                                                                                                                                                                                                                                                                                                                                                                                                                                                                                                                                                                                                                                                                                                                                                                                                                                                                                                                                                                                             | <b>6, 94</b>                      |
| Pg 16 line 298 rewrite the range using the word “to”.                                                                                                                                                                                                                                                                                                  | Done.                                                                                                                                                                                                                                                                                                                                                                                                                                                                                                                                                                                                                                                                                                                                                                                                                                                                                                                                                                                                                                                                 | <b>14, 293</b>                    |
| <b>Reviewer 7 (Alfonso Iorio, McMaster University)</b>                                                                                                                                                                                                                                                                                                 |                                                                                                                                                                                                                                                                                                                                                                                                                                                                                                                                                                                                                                                                                                                                                                                                                                                                                                                                                                                                                                                                       |                                   |
| This is an interesting piece of evidence, exploring a very timely and relevant topic.                                                                                                                                                                                                                                                                  | Thank you. We agree that it's very timely and relevant.                                                                                                                                                                                                                                                                                                                                                                                                                                                                                                                                                                                                                                                                                                                                                                                                                                                                                                                                                                                                               |                                   |
| Exploring the representation and quality of evidence around gender defined minorities and gender incongruence is an excellent way of prompting new researcher wherever there are gaps.                                                                                                                                                                 | Thank you. We agree.                                                                                                                                                                                                                                                                                                                                                                                                                                                                                                                                                                                                                                                                                                                                                                                                                                                                                                                                                                                                                                                  |                                   |
| Technically, the work was well conducted and reported with plenty of details.                                                                                                                                                                                                                                                                          | Thank you.                                                                                                                                                                                                                                                                                                                                                                                                                                                                                                                                                                                                                                                                                                                                                                                                                                                                                                                                                                                                                                                            |                                   |
| Here are some simple, broad suggestions for improvement.<br>1) Whilst fully understanding the underlying motivation for the SR, and the need to provide education to the readership in the specific field, the authors should consider focusing the information provided in the background section to what is relevant to understand the present work. | Thank you. We have refocused the information in the background to concentrate more on 'what is high quality?'                                                                                                                                                                                                                                                                                                                                                                                                                                                                                                                                                                                                                                                                                                                                                                                                                                                                                                                                                         | <b>6-9</b>                        |
| Similarly, the discussion should focus more on the results and methods of the review and less on the general topic. Maybe an accompanying editorial would be more appropriate to broaden the scope of the conversation.                                                                                                                                | Thank you. We have rewritten the manuscript to focus more on methods and results. If this were published, we think the suggestion of an accompanying editorial to broaden the scope of the conversation is good.                                                                                                                                                                                                                                                                                                                                                                                                                                                                                                                                                                                                                                                                                                                                                                                                                                                      | <b>24-29</b>                      |
| 2) I have one main concern on the study design, which is on one side the decision to exclude single country guidelines and on the other side to include only UK based stakeholders                                                                                                                                                                     | Thank you. We have improved the rationale. Our preliminary searches revealed: (i) a paucity of local and national UK guidelines. We accept that a local guideline can be high quality and have added this to discussion; (ii) We had thought the influential 2013 RCPsych “Good Practice Guidelines for Gender Dysphoria” represented the best of UK guidance. We scored this formally during our AGREE II training (and can supply the results if wished) but they are very low quality with no linkage of recommendations to evidence; (iii) RCPsych seemed to be derived from WPATH with a suggestion of ‘eminence-based’ medicine in an early passage (p 9): “ <i>The World Professional Association for Transgender Health’s (WPATH) standards of care for transsexual, transgender and gender non-conforming people have informed these UK standards of care. The endorsement by several medical Royal Colleges, allied medical professional societies and service user groups sends a strong signal for the adoption of these guidelines across the UK and</i> | <b>8-9, 137-166 &amp; 13, 260</b> |

## International Clinical Practice Guidelines for Gender Minority/Trans People: Systematic Review

|                                                                                                                                                                                                                                                                                                                                                                                                                                    |                                                                                                                                                                                                                                                                                                                                                                                                                                                                                                                                                                                                                                                                                                                                                                                                                                                                                                                                                                                                                                                                                                                                                                                                                                                                                                                                                                                                                                                                                                                                                                                                                                                                                                                                       |                                                            |
|------------------------------------------------------------------------------------------------------------------------------------------------------------------------------------------------------------------------------------------------------------------------------------------------------------------------------------------------------------------------------------------------------------------------------------|---------------------------------------------------------------------------------------------------------------------------------------------------------------------------------------------------------------------------------------------------------------------------------------------------------------------------------------------------------------------------------------------------------------------------------------------------------------------------------------------------------------------------------------------------------------------------------------------------------------------------------------------------------------------------------------------------------------------------------------------------------------------------------------------------------------------------------------------------------------------------------------------------------------------------------------------------------------------------------------------------------------------------------------------------------------------------------------------------------------------------------------------------------------------------------------------------------------------------------------------------------------------------------------------------------------------------------------------------------------------------------------------------------------------------------------------------------------------------------------------------------------------------------------------------------------------------------------------------------------------------------------------------------------------------------------------------------------------------------------|------------------------------------------------------------|
|                                                                                                                                                                                                                                                                                                                                                                                                                                    | <p><i>beyond</i>"; (iv) Many other countries' guidelines are also derived from WPATH.</p> <p>Thus, given WPATH's influence, we wanted to examine the international scene. We considered our project was identifying and scientifically appraising relevant "primary sources" (the influential international CPGs) rather than "spin offs" (national and local guidelines which reference WPATH as relevant in their development). By focusing on international guidelines, we recognise the work and influence of the expertise of professional bodies such as WPATH on UK practice and globally. We thought it would be wrong to compare WPATH and derivative CPGs as this could be seen as duplication. It was also wrong to mix one country (UK) and international CPGs as "apples and pears". International guidelines such as WHO have greater global relevance and influence than UK ones. Regarding the UK applicability of this study, WPATH has direct relevance. We are based in the UK, are interested in the implications for the NHS and thus wrote the paper for the BMJ. We decided it was prudent to focus on international guidelines in the first instance (as we did not have the resources to examine all international and all national CPGs). We have expanded on all these points in the revised introduction and methods. Regarding stakeholders we were not confident we could properly identify &amp; contact all international patient/ stakeholder organisations so limited the survey to the UK where we had more comprehensive local knowledge. It is the national context in which our team is based, so the two sets of stakeholder and reviewer prioritisation results might be more comparable.</p> |                                                            |
| <p>I am afraid this choice was unfortunate, for a series of consideration. First, the social acceptance and consequent health care system coverage of gender diversity related issues vary significantly among different countries, which is likely limiting a lot the space for international/multinational guidelines. Therefore, there are many more country-specific guidance documents (18) than international ones (12).</p> | <p>Thank you. We have added this important point to the discussion. We have explained our rationale for choosing international rather than country-specific guidance in the introduction, as many national CPGs are WPATH derivatives. Finally, whatever the social acceptance and healthcare coverage, the issues about 'what works, for whom and when?' should (mostly) be a matter of evidence.</p>                                                                                                                                                                                                                                                                                                                                                                                                                                                                                                                                                                                                                                                                                                                                                                                                                                                                                                                                                                                                                                                                                                                                                                                                                                                                                                                                | <p><b>25,</b><br/>402</p>                                  |
| <p>Not exploring the country level specific guidelines may well determine losing the most important content in the field, including what could be relevant to UK. Particularly in view of the well determine losing the most important content in the field, including what could be relevant to UK.</p>                                                                                                                           | <p>Thank you. See above. What we found in preliminary searches and have clarified in the introduction was that UK clinical practice appears to be influenced by WPATH as a "key" source. We have commented on a lack of national CPGs as a potential limitation.</p>                                                                                                                                                                                                                                                                                                                                                                                                                                                                                                                                                                                                                                                                                                                                                                                                                                                                                                                                                                                                                                                                                                                                                                                                                                                                                                                                                                                                                                                                  | <p><b>25,</b><br/>401</p>                                  |
| <p>Particularly in view of the well developed methodology to localize, adapt or even adolpment (following the GRADE terminology) there is no a priory robust reasoning in support of excluding single country guidelines.</p>                                                                                                                                                                                                      | <p>Thank you. Our rationale about international CPGs has been strengthened. We now mention adolpment in the discussion. We encourage future research (including single-country guideline appraisal) in this area.</p>                                                                                                                                                                                                                                                                                                                                                                                                                                                                                                                                                                                                                                                                                                                                                                                                                                                                                                                                                                                                                                                                                                                                                                                                                                                                                                                                                                                                                                                                                                                 | <p><b>27,</b><br/>461<br/>&amp;<br/><b>28,</b><br/>477</p> |
| <p>Also, the choice of limiting the stakeholders to one single country suggests, as somehow discussed by the authors, that they are interested in a UK relevant perspective (which is similar, in a way, to planning/ developing a country specific guideline), which would have not been included in the present review, if exisiting. I am not sure how this conundrum could be</p>                                              | <p>Thank you. We have expanded on how UK and international CPGs in this area are, in our view, interrelated.</p>                                                                                                                                                                                                                                                                                                                                                                                                                                                                                                                                                                                                                                                                                                                                                                                                                                                                                                                                                                                                                                                                                                                                                                                                                                                                                                                                                                                                                                                                                                                                                                                                                      | <p><b>8-9,</b><br/>137-<br/>166</p>                        |

## International Clinical Practice Guidelines for Gender Minority/Trans People: Systematic Review

|                                                                                                                                                                                                                                                                                                                                                                                                                                                                                                                                                                                                                                              |                                                                                                                                            |     |
|----------------------------------------------------------------------------------------------------------------------------------------------------------------------------------------------------------------------------------------------------------------------------------------------------------------------------------------------------------------------------------------------------------------------------------------------------------------------------------------------------------------------------------------------------------------------------------------------------------------------------------------------|--------------------------------------------------------------------------------------------------------------------------------------------|-----|
| solved, but to me, this is a major limitation of the current work.                                                                                                                                                                                                                                                                                                                                                                                                                                                                                                                                                                           |                                                                                                                                            |     |
| 3) My expertise in the guideline field, so I proposing this comment more to offer the authors a chance of clarifying. They state (Page 8, 145 and ss) that the latest definition for gender choice related health problems is incongruence, and that this is replacing the concept of dysphoria. However, in the rest of the paper, they continue to refer dysphoria. This seems a bit counterintuitive and requires some clarification; either the authors judge that incongruence is not yet an accepted term, and is better not used, or I would think science in the field would benefit from this paper adopting the latest definition. | Thank you. We have clarified our introduction on gender minority/trans health and amended the text to no longer focus on gender dysphoria. | 7   |
| 4) Many references are not uniquely identifiable (e.g. refs 7 and 8); please use urls pointing directly to a specific page, and indicate date of last access (using the BMJ mandated format).                                                                                                                                                                                                                                                                                                                                                                                                                                                | We have revised the references where feasible.                                                                                             | Ref |

1 International Clinical Practice Guidelines for Gender Minority/Trans People: Systematic  
2 Review and Quality Assessment

3

4 Sara Dahlen<sup>1</sup>, Bioethics & Society student [s.dahlen@doctors.org.uk](mailto:s.dahlen@doctors.org.uk) ORCID ID 0000-  
5 0002-1798-1816

6 Dean Connolly<sup>2, 3</sup>, Foundation Doctor and Visiting Researcher [dean.j.connolly@kcl.ac.uk](mailto:dean.j.connolly@kcl.ac.uk)  
7 ORCID ID 0000-0002-3139-4263

8 Isra Arif<sup>4</sup>, Medical student [isra.arif@kcl.ac.uk](mailto:isra.arif@kcl.ac.uk) ORCID ID 0000-0002-8623-206

9 Muhammad Hyder Junejo<sup>5</sup>, Junior Clinical Fellow [muhammad.junejo@nhs.net](mailto:muhammad.junejo@nhs.net) ORCID  
10 ID 0000-0003-2458-9991

11 Susan Bewley<sup>6</sup>, Professor Emeritus (Honorary) of Obstetrics and Women's Health  
12 [susan.bewley@kcl.ac.uk](mailto:susan.bewley@kcl.ac.uk) ORCID ID 0000-0001-8064-652X

13 Catherine Meads<sup>7\*</sup>, Professor of Health [catherine.meads@anglia.ac.uk](mailto:catherine.meads@anglia.ac.uk) ORCID ID 0000-  
14 0002-2368-0665

15 (1) Department of Global Health and Social Medicine, King's College London, Bush  
16 House, North East Wing, 40 Aldwych, London, WC2B 4BG, UK

17 (2) Newham University Hospital, Glen Rd, London, E13 8SL, UK

18 (3) Addictions Department Institute of Psychiatry, Psychology and Neuroscience, King's  
19 College London, 4 Windsor Walk, Denmark Hill, London, SE5 8BB, UK

20 (4) King's College London, Strand, London, WC2R 2LS, UK

21 (5) Genitourinary Medicine, Chelsea and Westminster Hospital NHS Foundation Trust,  
22 c/o 56 Dean Street, Soho, London W1D 6AE, UK

1  
2  
3  
4  
5  
6  
7  
8  
9  
10  
11  
12  
13  
14  
15  
16  
17  
18  
19  
20  
21  
22  
23  
24  
25  
26  
27  
28  
29  
30  
31  
32  
33  
34  
35  
36  
37  
38  
39  
40  
41  
42  
43  
44  
45  
46  
47  
48  
49  
50  
51  
52  
53  
54  
55  
56  
57  
58  
59  
60

23 (6) Department of Women and Children's Health, School of Life Course Sciences,  
24 King's College London, c/o 10<sup>th</sup> floor North Wing, St Thomas' Hospital, London SE1  
25 7EH, UK

26 (7) Faculty of Health, Medicine, Education and Social Care, Anglia Ruskin University,  
27 East Road, Cambridge, CB1 1PT, UK

28

29 \*Corresponding author and reprint requests: Catherine Meads

30 Email: catherine.meads@anglia.ac.uk

31 Tel: 07850 864327

32

33 Short title: Quality of clinical practice guidelines for gender minority/trans people

34

35 Keywords: Gender dysphoria, gender identity, gender minority, gender diverse, gender  
36 non-conforming, gender incongruence, non-binary, transgender, transsexual, systematic  
37 review, clinical practice guideline, AGREE II, quality appraisal

38

39 Word count: 3,296 excluding abstract, summary box, tables, references and  
40 supplementary material

41

42 Acknowledgments: We thank Richard Wakeford and Leena Järveläinen (librarians,  
43 British Library and Turku University Library), Gillian Claire Evans (German  
44 translations), Sarah Peitzmeier, Sam Winter, Christina Richards and Riittakerttu Kaltiala

1  
2  
3 45 (opinion leaders), Paul Seed (statistician), researchers who shared copies of their papers,  
4  
5 46 and all the UK stakeholders who participated in the prioritisation exercise.  
6  
7  
8 47

#### 9 10 48 **Compliance with Ethical Standards**

11  
12 49 Disclosure of potential conflicts of interests: The authors had no financial support for this  
13  
14 50 work. There were no financial relationships with any organisations that might have an  
15  
16 51 interest in the submitted work in the previous 3 years and there were no other  
17  
18 52 relationships or activities that could appear to have influenced the submitted work. All  
19  
20 53 authors declare they have no conflict of interests. SB, SD & DC's declarations can be  
21  
22 54 found at <http://www.whopaysthisdoctor.org>  
23  
24

25  
26 55 Ethical approval and informed consent: Not applicable. The article is a systematic review.  
27

28 56 Dissemination plan: Not applicable, publication will be shared with stakeholders.  
29

30  
31 57 Contribution to authorship: The authors were involved as follows: SB, IA, CM  
32  
33 58 conception. All authors (SD, DC, IA, MJ, SB, CM) were involved in design, execution,  
34  
35 59 analysis, drafting manuscript and critical discussion; all were responsible for revision and  
36  
37 60 final approval of the manuscript. All authors had full access to all the data (including  
38  
39 61 statistical reports and tables) in the study and can take responsibility for the integrity of  
40  
41 62 the data and the accuracy of the data analysis. CM acts as guarantor.  
42  
43

44  
45 63 Transparency declaration: CM affirms that the manuscript is an honest, accurate, and  
46  
47 64 transparent account of the study being reported; that no important aspects of the study  
48  
49 65 have been omitted; and that any discrepancies from the study as originally planned and  
50  
51 66 registered have been explained.  
52

53  
54 67 Role of the funding source: Not applicable as unfunded.  
55  
56  
57  
58  
59  
60

1  
2  
3 69 **Structured abstract**  
4

5 70 **Objectives:** To identify and critically appraise published international clinical practice  
6  
7  
8 71 guidelines (CPGs) for the assessment and health care of gender minority/trans people.  
9

10 72 **Design:** Systematic review and quality appraisal of CPGs using AGREE II tool.  
11

12 73 **Setting:** Six databases and six CPG websites were searched, and international key  
13  
14  
15 74 opinion leaders approached. UK-based stakeholder and reviewer AGREE II domain  
16  
17 75 prioritisation was performed.  
18

19 76 **Participants:** Adults and/or children who are gender minority/trans-identifying with no  
20  
21  
22 77 exclusions due to comorbidities, except differences in sexual development (intersex).  
23

24 78 **Intervention:** Any health-related intervention connected to the care of gender  
25  
26 79 minority/trans people, including screening, assessment, referral, diagnosis and treatments.  
27

28 80 **Main outcome measures:** Number of international CPGs addressing the health of gender  
29  
30  
31 81 minority/trans people, AGREE II scores, information on estimated changes in mortality  
32  
33 82 or quality of life (any measure), consistency of recommended interventions, and appraisal  
34  
35 83 of key messages for patients.  
36

37 84 **Results:** Twelve international CPGs addressed gender minority/trans people's healthcare  
38  
39  
40 85 as a full (n=5), in part (n=4) or minimal (n=3) component of guidance. A wide range of  
41  
42 86 AGREE II quality scores was found whichever domain was prioritised; stakeholder  
43  
44 87 involvement (favoured by UK stakeholders, 14-93%), or methodological rigour (favoured  
45  
46 88 by reviewers, 17-87%). Five higher-quality CPGs described trans people as a key  
47  
48 89 population for HIV and other blood-borne infections (overall assessment scores 69-94%).  
49  
50 90 Six lower-quality CPGs concerned transition-specific interventions (overall assessment  
51  
52 91 scores 11-56%). No international CPGs dealt with primary care, mental health, or longer-  
53  
54  
55  
56  
57  
58  
59  
60

1  
2  
3 92 term medical issues. There was little and conflicting information on estimated changes in  
4  
5 93 mortality and quality of life. The consistency of recommendations could not be examined  
6  
7  
8 94 due to lack of clarity and overlap. No CPG provided key messages for patients.  
9

10 95 **Conclusions:** Gender minority/trans people are ill-served by present international  
11  
12 96 guidelines which are limited to the HIV epidemic and transition. A paucity of high-  
13  
14 97 quality guidance, especially relating to mortality, quality of life, sizes of benefits and  
15  
16 98 harms, and patient facing material must be addressed. To deliver equitable, high-quality  
17  
18  
19 99 healthcare that gender minority/trans people deserve, future guidelines must be based on  
20  
21 100 evidence from systematic reviews, incorporating patient values and preferences as well as  
22  
23 101 considering clinical and cost-effectiveness. Unbiased processes, independent external  
24  
25 102 review and health agency assurances are needed, so that individuals and policy makers  
26  
27  
28 103 can make properly informed decisions.  
29

30  
31 104 **Trial registration:** The protocol was prospectively registered with PROSPERO  
32  
33 105 (CRD42019154361)  
34  
35  
36  
37  
38  
39  
40  
41  
42  
43  
44  
45  
46  
47  
48  
49  
50  
51  
52  
53  
54  
55  
56  
57  
58  
59  
60



107 **Summary Box****What is already known on this topic**

- Unbiased, high-quality, evidence-based international clinical practice guidelines (CPGs) improve health outcomes.
- More gender minority/trans people are seeking and receiving transition-related care and have continuing health needs.

**What this study adds**

- First systematic review to use a validated quality appraisal instrument to assess all international CPGs addressing gender minority/trans health.
- Five higher-quality CPGs (overall AGREE II score 69-94%) focus on gender minority/trans people as a key population for HIV and other blood-borne infections, whereas six lower-quality guidelines (overall AGREE II score 11-56%) focus on transition interventions. None focus on primary care, mental health, or long-term medical issues.
- There is a need to improve the quality of healthcare advice for gender minority/trans people by producing evidence-based, methodologically sound, independently assured guidance with better stakeholder involvement and informative patient-facing decision aids.

108

## 110 **Introduction**

### 111 *Clinical practice guidelines*

112 Evidence-based practice integrates the best available research evidence with clinical  
113 expertise and the patient's unique values and circumstances[1]. Clinical practice  
114 guidelines (CPGs) are "statements that include recommendations intended to optimise  
115 patient care that are informed by a systematic review of evidence and an assessment of  
116 the benefits and harms of alternative care options"[2]. Recommendations are used by and  
117 for patients, alongside professional judgement, directly or within decision aids, in training  
118 and practice. High-quality CPGs are necessary to guide clinicians and policy makers[3],  
119 to improve the quality of care[4], thereby affecting patient safety[5] and outcomes,  
120 including by reducing between-clinician variation[2]. Healthcare experts, specialist  
121 societies and patient-interest groups have often relied on guidelines that are potentially  
122 biased by clinical observations, short-term 'before-and-after' studies, proxy measures and  
123 industry-funded research[6,7]. Methodological improvements have included  
124 transparency, rigour, independence, multidisciplinary input, patient and public  
125 involvement, avoidance of commercial influences and rapidity[7,8]. At national level,  
126 there are recognised methods to produce CPGs[2,9,10]. Health Technology Agencies are  
127 available worldwide to provide independent assurance and benchmarking[11,12].  
128 Guideline developers should respond to, and guide, research. Clinicians should aim to use  
129 unbiased CPGs which take account of patient's needs with specific, unambiguous and  
130 relevant recommendations to direct management[13]. CPGs developed by global experts  
131 and aimed at international audiences should be evidence-based, rigorous in methodology

1  
2  
3 132 and provide a means of improving healthcare quality, although application might vary by  
4  
5 133 country context.

6  
7  
8 134

9  
10 135 *Gender minority/trans people and healthcare*

11  
12 136 ‘Trans’ is an umbrella term for individuals whose inner sense of self (gender identity) or  
13  
14 137 how they present themselves using visual or behavioural cues (gender expression) differs  
15  
16 138 from the expected stereotypes culturally assigned to their biological sex (gender)[14,15].  
17  
18 139 Gender minority is an often-used alternative population description. Like all individuals,  
19  
20 140 gender minority/trans people require high-quality evidence-based healthcare[16,17],  
21  
22 141 which addresses both their general and more specific needs. Gender dysphoria is a  
23  
24 142 condition describing the psychological distress arising from marked incongruence  
25  
26 143 between biological sex and gender identity. Until recently, an ICD-10 diagnosis of gender  
27  
28 144 dysphoria was required in order to access medical transition[18], now changed to gender  
29  
30 145 incongruence with ICD-11[19]. Psychological, social, mechanical, pharmaceutical or  
31  
32 146 surgical interventions are offered to alleviate dysphoria, including a variety, or  
33  
34 147 combinations, of reversible, partially reversible and irreversible steps[20]. These include  
35  
36 148 puberty blockers, long-term sex hormone controlling medications, voice training and  
37  
38 149 surgical alterations of the chest/breasts, genitalia or face, amongst others[21]. Gender  
39  
40 150 dysphoria can affect many areas of life, including personal development, self-esteem,  
41  
42 151 body image, employment and relationships[22]. Patient numbers referred to UK gender  
43  
44 152 identity clinics for treatment of gender dysphoria and length of waiting lists have  
45  
46 153 increased in the last decade[23], particularly for adolescents[24], a phenomenon also seen  
47  
48 154 elsewhere[25]. Gender minority/trans people may have continuing, sometimes complex,  
49  
50  
51  
52  
53  
54  
55  
56  
57  
58  
59  
60

1  
2  
3 155 life-long healthcare needs whether they undergo medical transition or not. Despite efforts  
4  
5 156 to depathologise, some evidence suggests unique biological, behavioural and social  
6  
7 157 factors lead to health risks in gender minority/trans populations[16]. Gender  
8  
9 158 minority/trans people may experience more mental health issues such as mood and  
10  
11 159 anxiety disorders[26], substance use[22,23], and higher rates of suicidal ideation[24,25].  
12  
13 160 They may seek assistance with sexual health, mental health[30], substance use  
14  
15 161 disorders[31], prevention and/or management of HIV[32] as well as usual general health  
16  
17 162 enquiries. However, they may encounter difficulties in accessing healthcare[17], report  
18  
19 163 negative healthcare experiences[33] and face discrimination and stigma[30,31].  
20  
21  
22  
23  
24  
25

### 26 165 *International CPGs in gender minority/trans health and their evaluation*

27  
28 166 The reported poor population health and difficulties with accessing appropriate healthcare  
29  
30 167 for gender minority/trans people suggest a need for high-quality guidance. Published  
31  
32 168 CPGs for healthcare practitioners treating gender minority/trans people should guide best  
33  
34 169 practice on the basis of collating the best available evidence using the best methods.  
35  
36 170 Globally, there are continuing debates about ethics, law, policy and healthcare  
37  
38 171 management[36]. CPGs play a role in influencing the discourse[37]. Presently, the World  
39  
40 172 Professional Association for Transgender Health's (WPATH) Standards of Care Version  
41  
42 173 7 (SOCv7)[20] represent international normative standards for clinical care, thus acting  
43  
44 174 as the benchmark in this field[21], despite some expressed reservations[37]. Various  
45  
46 175 instruments have been developed to assess CPGs[3]. The Appraisal of Guidelines for  
47  
48 176 Research and Evaluation (AGREE II instrument)[38,39] is the most comprehensively  
49  
50 177 validated and evaluated tool available[3,40], employed internationally for assessing  
51  
52  
53  
54  
55  
56  
57  
58  
59  
60

1  
2  
3 178 guidelines, and was designed for use by non-expert stakeholders[39] such as healthcare  
4  
5 179 providers, practicing clinicians and educators[41].  
6  
7

8 180

9  
10 181 *Research aim/ question*

11  
12 182 This study aimed to identify and critically appraise all published international CPGs for  
13  
14 183 the assessment and care of gender minority/trans people using the AGREE II instrument.  
15  
16

17 184

18  
19 185 **Methods**

20  
21 186 This systematic review was conducted according to a pre-specified PROSPERO protocol  
22  
23 187 (CRD42019154361) uploaded 19<sup>th</sup> December 2019.

24  
25 188 [https://www.crd.york.ac.uk/prospero/display\\_record.php?RecordID=154361](https://www.crd.york.ac.uk/prospero/display_record.php?RecordID=154361).  
26  
27

28 189 *Inclusion and exclusion criteria*

29  
30 190 We defined CPGs as a systematically developed set of recommendations that assist  
31  
32 191 practitioners and patients in the provision of healthcare in specific circumstances,  
33  
34 192 produced after review and assessment of available clinical evidence[2,42–44]. CPGs  
35  
36 193 published after 1<sup>st</sup> January 2010 were eligible if they (or part thereof) specifically targeted  
37  
38 194 patients/population with gender minority/trans status and/or gender dysphoria, were  
39  
40 195 evidence-based, with some documentation of development methodology, had  
41  
42 196 international scope (more than one country, defined as a Member State of the United  
43  
44 197 Nations), and were an original source. CPGs were eligible if they met the following  
45  
46 198 inclusion criteria: participants/population was adults and/or children who are gender  
47  
48 199 minority/trans-identifying with no exclusion due to comorbidities or age although  
49  
50 200 differences/disorders in sexual development (intersex) were excluded;  
51  
52  
53  
54  
55  
56  
57  
58  
59  
60

1  
2  
3 201 exposure/intervention was any health intervention related to gender dysphoria or gender  
4  
5 202 affirmation, or health concerns of gender minority/trans people, including screening,  
6  
7 203 assessment, referral, diagnosis and interventions. Broad criteria were used because  
8  
9 204 terminology has been in flux with changes made in both ICD and DSM diagnostic  
10  
11 205 criteria[14]. There were no restrictions on setting or language. Exclusion criteria were:  
12  
13 206 published before January 2010, single author, single country, adaptations of another CPG,  
14  
15 207 original research, reviews, letters, opinions, editorials, case-reports, books, and  
16  
17 208 commentaries.

18  
19  
20  
21 209 *Search strategy and guideline selection*

22  
23 210 Searches were conducted to 11<sup>th</sup> June 2020 (CM). Search terms and appropriate  
24  
25 211 synonyms (as MeSH terms and text words) were developed based on population and  
26  
27 212 exposures (Web/Supplementary Table 1). Six databases (platforms) were searched  
28  
29 213 (EMBASE, MEDLINE, Web of Science, PsycINFO, CINAHL, Google). Six CPG  
30  
31 214 websites were searched (Agency for Healthcare Research and Quality National Guideline  
32  
33 215 Clearinghouse, eGuidelines and Guidelines, National Institute for Health and Care  
34  
35 216 Excellence National Library for Health, Scottish Intercollegiate Guidelines Network,  
36  
37 217 EBSCO DynaMed Plus, Guidelines International Network Library) and the World Health  
38  
39 218 Organisation (WHO). Four specialty journals were hand-searched (International Journal  
40  
41 219 of Transgender Health, Transgender Health, LGBT Health, Journal of Homosexuality) by  
42  
43 220 individual reviewers (IA, DC, MJ). Four separate Google searches were performed  
44  
45 221 independently by two reviewers (IA, SD) using one generic (clinical practice guidelines)  
46  
47 222 plus one specific term (transgender, gender dysphoria, trans health, or gender minority)  
48  
49 223 and examining the first 100 hits. International key opinion leaders (n=24) were also  
50  
51  
52  
53  
54  
55  
56  
57  
58  
59  
60

1  
2  
3 224 approached to identify further guidelines. Reference lists of relevant reviews and all full-  
4  
5 225 text studies were hand searched to identify any relevant papers or CPGs not found by  
6  
7  
8 226 database searching. All titles and abstracts were read and assessed for inclusion  
9  
10 227 independently by two reviewers (SB, SD). If there was uncertainty or disagreement, or  
11  
12 228 reasonable suspicion that the full-text might lead to another relevant CPG, the full-text  
13  
14 229 was obtained. Google-translate was used for non-English abstracts but if a possible CPG  
15  
16 230 could not be reliably excluded, the full-text paper was obtained and translated. Where  
17  
18 231 full-text publications could not be accessed, authors were contacted directly. Full-text  
19  
20 232 assessment to determine inclusion or exclusion from the systematic review was carried  
21  
22 233 out independently by two reviewers (SB and either DC/MJ) based on the above criteria.  
23  
24 234 Reasons for excluding full-texts were noted. The whole team discussed uncertainties and  
25  
26 235 disagreements to achieve consensus, with voting and final adjudication by the senior  
27  
28 236 author (CM).

### 237 *Data extraction and quality assessment*

238 The rationale was to identify the key international CPGs available to healthcare  
239 practitioners in this emerging, complex field of clinical practice. AGREE II[41] was  
240 considered the most appropriate tool, partly as it is validated, available and designed for  
241 any clinician to use, and benefits from several people applying the criteria independently.  
242 All authors completed AGREE II video training, a practice assessment, and two pilots  
243 whose results were discussed. Quality scoring was completed independently and  
244 anonymously by the six reviewers using the standard proforma (myAgree Plus platform,  
245 AGREE Enterprise website)[41]. AGREE II synthesis calculates quality scores from 23  
246 appraisal criteria organised into six key domains (scope and purpose, stakeholder

1  
2  
3 247 involvement, rigour of development, clarity of presentation, applicability, editorial  
4  
5 248 independence) and an overall assessment (Recommend for use? Options; yes, no, yes if  
6  
7 249 modified). Formal descriptive data collection of included CPGs was performed  
8  
9 250 independently by two authors (SB, SD). All ambiguities or discrepancies were referred to  
10  
11 251 the team for discussion and to re-examine original texts and extract data. Information  
12  
13 252 collected was title, author, year of publication, number of countries covered, originating  
14  
15 253 organisation, audience, methods used, page and reference numbers (excluding  
16  
17 254 accompanying materials), and funding. In addition, data was extracted about publication  
18  
19 255 outlet (journal/website), recommendation text, and whether the quantity of information  
20  
21 256 pertaining to the health of gender minority/trans people was whole, partial or minimal.  
22  
23  
24  
25  
26 257 All text mentions of mortality or any measures of quality of life were searched for, and  
27  
28 258 noted if accompanied by a citation.

### 29 30 31 259 *Patient and Public Involvement*

32  
33 260 An AGREE II domain prioritisation exercise was conducted in January 2020 via email,  
34  
35 261 with one reminder. The UK was chosen to ensure comprehensive representation of  
36  
37 262 stakeholders most relevant to the NHS. Fifty-two UK service-user stakeholder groups and  
38  
39 263 gender minority/trans advocacy organisations were identified and informed about the  
40  
41 264 study, with a link to the protocol. They were invited to participate in a stakeholder  
42  
43  
44  
45 265 prioritisation of the six AGREE II domains, created using SurveyMonkey®  
46  
47  
48 266 <https://www.surveymonkey.co.uk/r/WLZ55NQ> and with an option to remain anonymous.  
49  
50 267 The reviewer team also performed this exercise.

### 51 52 53 268 *Outcomes*



1  
2  
3 269 The primary outcome was the number of international CPGs addressing the health of  
4  
5 270 gender minority/trans people. Secondary outcomes were: CPG quality assessment scores  
6  
7 271 using AGREE II; the presence or absence of information on estimated changes in  
8  
9 272 mortality or quality of life (any measure) following any specific recommended  
10  
11 273 intervention, over any time interval; the consistency (or lack thereof) of recommendations  
12  
13 274 across the CPGs; and the presence or absence of key messages for patients.  
14  
15

### 16 17 275 *Strategy for Data and Statistical Analyses*

18  
19 276 Simple frequencies were used to present the stakeholder and reviewer priorities and  
20  
21 277 outcomes. Following team discussion of the prioritisation exercise, no pre-specified  
22  
23 278 quality threshold score was used to define high or low quality, although colour was  
24  
25 279 superimposed (30% and 70%) on the final scores table to aid visual comparisons and  
26  
27 280 interpretation.  
28  
29

30  
31 281

### 32 33 282 **Results**

34  
35 283 Figure 1 (PRISMA flow chart[45]) shows that 1,781 citations were identified, of which  
36  
37 284 134 full-text publications were read (all available, three supplied by authors) and 122  
38  
39 285 excluded (Supplementary Table W3 with reasons). Results of the domain prioritisation by  
40  
41 286 stakeholders (n=19 replies, response rate 39% excluding 3 ‘undeliverable’) and reviewers  
42  
43 287 (n=6) showed that stakeholders prioritised stakeholder involvement, whereas the research  
44  
45 288 team prioritised methodological rigour (Supplementary Table W2).  
46  
47

### 48 49 289 *Primary outcome*

50  
51 290 *Clinical Practice Guidelines and characteristics*  
52  
53  
54  
55  
56  
57  
58  
59  
60

1  
2  
3 291 Twelve CPGs (Table 1) originated from: the WHO, (n=3)[46–48], WPATH (n=2)[20,49],  
4  
5 292 professional specialist/special-interest societies (n=4)[50–53], small groups of experts  
6  
7 293 (n=2)[54,55] and one consortium[56]. All were published in English, in journals[49–55],  
8  
9 294 the organisation’s website[46–48,56], or both[20]. Guideline development methodology  
10  
11 295 was variable, including use of systematic reviews (Table 1). Ten CPGs had no external  
12  
13 296 review, and eight had no update plans. Transgender health recommendations made up  
14  
15 297 whole (n=5)[20,49,51,53,55], partial (n=4)[46–48,54] or minimal (n=3)[50,52,56]  
16  
17 298 content. The CPGs contained 10-155 pages and 20-505 references. Funding sources were  
18  
19 299 wide-ranging and sometimes multiple; from government agencies, professional societies,  
20  
21 300 charities and private donations. Two provided no funding details[50,54].  
22  
23  
24  
25

26 301 *Secondary outcomes*

27  
28 302 *Quality prioritisation and assessment*

29  
30  
31 303 Table 2 shows that AGREE II scores were highly variable by domain (8-94%), and  
32  
33 304 overall (11-94%). The two prioritised domain scores were usually comparable with the  
34  
35 305 overall AGREE II quality assessment (ranges; stakeholder involvement 14-93%,  
36  
37 306 methodological rigour 17-87%). Four CPGs obtained a majority opinion of ‘recommend  
38  
39 307 for use’[46–48,56], five CPGs had unanimous ‘do not recommend’[20,49,53–55], and  
40  
41 308 three had minority support with division about the extent of ‘yes, if modified’ [50–  
42  
43 309 52](Table 2). There was wide variation in overall scores; HIV and blood-borne infection  
44  
45 310 guidelines[46–48,52,56] were stronger and the quality of transition-related CPGs was  
46  
47 311 poorer[20,51,53–55].  
48  
49  
50

51 312 *Content*  
52  
53  
54  
55  
56  
57  
58  
59  
60

1  
2  
3 313 Four CPGs concerning HIV prevention, transmission and care[46–48,52], and one public  
4  
5 314 health guideline on population screening for blood-borne viruses[56], contained  
6  
7 315 recommendations for gender minority/trans people as a ‘key population’. Three CPGs  
8  
9  
10 316 were devoted to overall transition care for all gender minority/trans people[20,51,53], two  
11  
12 317 to an aspect of transition[49,54], and one to transition in a specific group[55]. One  
13  
14 318 oncology communication guideline contained a single recommendation relating to trans  
15  
16 319 people[50]. No international guidelines were found that addressed primary care,  
17  
18  
19 320 psychological support/mental health interventions, or general medical/chronic disease  
20  
21 321 care (such as cardiovascular, cancer or elderly care). The transition-related CPGs lacked  
22  
23  
24 322 methodological rigour and relied on patchier, lower-quality primary research.  
25

### 26 323 *Mortality and Quality of Life*

27  
28 324 Six CPGs referred to mortality[20,46,48,51,52,56] and eight to quality of  
29  
30 325 life[20,46,47,49,51–53,56] (Table 2). More robust evidence with references was linked to  
31  
32 326 the recommendations in the HIV and blood-borne virus CPGs. Transition CPGs had little,  
33  
34  
35 327 inconsistent data and poorer linking to evidence.  
36

### 37 328 *Consistency of recommendations across the CPGs*

38  
39  
40 329 There was little overlap of topic content across the CPGs. Many recommendations were  
41  
42 330 similar, but not identical, in WHO 2011[46] and 2016[48], the former not being stood  
43  
44 331 down after the latter was published. Additionally, it proved impossible for all six authors  
45  
46 332 independently attempting data extraction to clearly distinguish key recommendations in  
47  
48  
49 333 WPATH SOCv7[20]. After discussion, it was decided not to revisit inclusions post hoc  
50  
51 334 but to abandon this protocol aim.  
52

### 53 335 *Patient facing material*

1  
2  
3 336 No patient-facing material was found in any guideline.  
4

5 337  
6

7  
8 338 **Discussion**  
9

10 339 *Statement of principal findings*  
11

12 340 A small number of international guidelines regarding gender minority/trans people's  
13  
14 341 healthcare exist. Nearly half focus on HIV and other blood-borne infections and are  
15  
16 342 higher-quality[46–48,52,56]. Half focus on transition and are lower-quality[20,49,51,53–  
17  
18 343 55]. There is an absence of guidelines relating to primary care, mental health or longer-  
19  
20 344 term medical issues. It was impossible to reliably discern key recommendations in  
21  
22 345 WPATH SOCv7[20]. All CPGs lacked detail on gender minority/trans people's overall  
23  
24 346 health with meagre, conflicting information regarding mortality and quality of life, and  
25  
26 347 no patient-facing messages.  
27  
28  
29

30  
31 348 *Strengths and weaknesses of this study*  
32

33 349 Strengths include protocol preregistration, stakeholder involvement, piloting all stages, an  
34  
35 350 extensive systematic search without language restriction for any relevant current  
36  
37 351 guidelines, wide inclusion criteria including grey literature, use of key opinion leaders  
38  
39 352 and snowballing, double full text reading and data entry, and careful presentation of  
40  
41 353 results. Using six trained reviewers, exceeding AGREE II recommendations,  
42  
43 354 compensated for expected variation in scoring. Extensive searches should have mitigated  
44  
45 355 loss of CPGs due to changes in terminology and diagnostic criteria. Limitations include  
46  
47 356 the UK-specific stakeholder prioritisation exercise, because of particular interest in  
48  
49 357 implications for the NHS; stakeholders from other countries might have different  
50  
51 358 priorities. One CPG was excluded post-scoring as it was withdrawn[57]. It was arguable  
52  
53  
54  
55  
56  
57  
58  
59  
60

1  
2  
3 359 if four included CPGs did meet criteria: one had not been withdrawn[46]; one contained  
4  
5 360 minimal relevant content[50]; one might not have been intended as a CPG[20] (WPATH  
6  
7 361 SoCv7's stated overall goal is "to provide clinical guidance for health professionals"[20],  
8  
9 362 although there is no list of key recommendations nor auditable quality standards, yet it is  
10  
11 363 widely used to compare procedures covered by US providers[58–60]); one variously  
12  
13 364 described itself as 'position statement' and 'position study' (stating it did "not aim to  
14  
15 365 provide detailed clinical guidelines for professionals such as... [named][20,51]", but  
16  
17 366 evidence was obviously linked to key recommendations for clinicians[53]). Excluding  
18  
19 367 these would not change overall findings or interpretation.  
20  
21  
22

23  
24 368 *Comparison with other studies, discussing important differences in results*  
25

26 369 This is the first systematic review using a validated quality appraisal instrument of  
27  
28 370 international CPGs addressing gender minority/trans health. It may act as a benchmark to  
29  
30 371 monitor and improve population healthcare. CPG quality results correspond with, and  
31  
32 372 quantitatively confirm, previously noted concerns about the evidence-base[37,61,62] and  
33  
34 373 variable use of quality assessment in systematic reviews[63–65]. Previous observations  
35  
36 374 have been made regarding unknown or unclear longitudinal outcomes, especially for  
37  
38 375 interventions at younger ages[24]. AGREE II has been applied to CPGs in other medical  
39  
40 376 fields, including cancer[66–68], diabetes[69,70], pregnancy[71,72] and depression[73].  
41  
42 377 These exercises tend to show room for improvement. Clinicians have been criticised for  
43  
44 378 not using methodological rigour when writing reliable evidence-based guidelines[74], as  
45  
46 379 well as not implementing high-quality CPGs[75]. Thus, finding poor quality CPGs is not  
47  
48 380 confined to this area of healthcare[76]. Improvement messages are generalisable to other  
49  
50 381 specialties. Although commonly found, it is not considered best practice for specialist  
51  
52  
53  
54  
55  
56  
57  
58  
59  
60

1  
2  
3 382 groups, with competing interests, to produce guidelines without external help and quality  
4  
5 383 assessment[77,78].  
6

7 384 *Meaning of the study: possible explanations and implications for clinicians and*  
8  
9 385 *policymakers*  
10

11 386 Clinicians need to be aware that the evidence-base outside HIV-related gender  
12  
13 387 minority/trans health CPGs is weak and should proceed with caution. The lack of patient-  
14  
15 388 facing material must be addressed, especially as medical and non-medical online material  
16  
17 389 contains jargon, is unreliable and potentially misleading[79]. Policy makers need to be  
18  
19 390 aware of the limited evidence-base, variations in methodological rigour, and lack of  
20  
21 391 stakeholder involvement. There are implications for education and curricular content,  
22  
23 392 such as that underpinning new gender identity healthcare credentials[80], which should  
24  
25 393 be carefully scrutinised. The particular focus on trans people in the HIV epidemic may  
26  
27 394 relate to applying public health and human rights lenses[81,82]. HIV and medical  
28  
29 395 transition are only two parts of overall healthcare needs, and consideration of other  
30  
31 396 aspects of gender minority/trans people's wellbeing is required. WPATH SOCv7[20]  
32  
33 397 cannot be considered the current 'gold standard'. The document is due for updating and  
34  
35 398 this study should be used positively to accelerate improvement. Countries might  
36  
37 399 reconsider the wisdom of adapting low-quality 'off the shelf' international CPGs[83–85].  
38  
39 400 Policymakers need to invest in both primary research and high-quality systematic reviews  
40  
41 401 in areas relevant for CPG and service development. Although editorial independence was  
42  
43 402 the lowest priority for stakeholders, independent external review is important to avoid  
44  
45 403 biases and bad practices, examine use of resources, resist commercial interests, and gain  
46  
47  
48  
49  
50  
51  
52  
53  
54  
55  
56  
57  
58  
59  
60

1  
2  
3 404 widespread credibility outside the field. Clinicians need to explain uncertainties to  
4  
5 405 patients, recruit to research and further develop a learning culture beyond empiricism.  
6

7  
8 406 *Unanswered questions and future research*  
9

10 407 This study should be replicated as new iterations of international CPGs become available  
11  
12 408 and applied to national guidelines. When the ‘best available evidence’ is poor, quality  
13  
14 409 improvement can be driven both from inside and outside the field. Qualities required are  
15  
16 410 recognition of uncertainties, less stigma, better patient and public involvement,  
17  
18 411 independence and methodological rigour. The UK is fortunate in being familiar with  
19  
20 412 developing priority-setting partnerships (e.g. James Lind Initiative[86]) and generating  
21  
22 413 suites of clinical questions that might cover all steps in patient pathways (e.g. in  
23  
24 414 partnership with Cochrane Collaboration[87]). These could underpin multidisciplinary  
25  
26 415 and funded research priorities whose results feed into future better evidence-based CPGs  
27  
28 416 (e.g. using SIGN[10], NICE[9] or MAGICApp[88]). The WHO demonstrates how  
29  
30 417 guideline development can achieve high quality. NICE[89] has an accreditation system  
31  
32 418 for UK specialist societies such as the British Association of Gender Identity  
33  
34 419 Specialists[90] to raise standards and improve patient care. International guideline  
35  
36 420 developers for this population need more primary research, and impetus from clinicians  
37  
38 421 and scientists to build a better evidence base, especially regarding chronic diseases,  
39  
40 422 minority stress[91], health behaviours, substance use, screening[65] and how  
41  
42 423 interventions (e.g. hormones) might impact on long-term health (e.g. risk of  
43  
44 424 cardiovascular and thromboembolic disease). Mortality and quality of life data is vital to  
45  
46 425 address questions of clinical and cost-effectiveness. Sizes of benefits and harms are  
47  
48 426 needed to populate patient-facing decision aids, e.g. Fact Boxes and icon arrays[92,93].  
49  
50  
51  
52  
53  
54  
55  
56  
57  
58  
59  
60

1  
2  
3 427 Future guidelines need more robust data from randomised controlled trials and long-term  
4  
5 428 observational cohort studies, alongside development of personalised ‘expected test result  
6  
7 429 ranges’ and interpretations pertaining to age and medical interventions such as exogenous  
8  
9 430 hormonal control.

### 11 431 *Conclusion*

12  
13  
14 432 Gender minority/trans people deserve high-quality, holistic healthcare that is reflected in  
15  
16 433 international CPGs. This vulnerable population is inadequately served by current  
17  
18 434 international guidelines, limited to HIV or transition-related interventions.

19  
20  
21 435

### 22 436 Licence Statement

23  
24  
25  
26 437 The Corresponding Author has the right to grant on behalf of all authors and does grant  
27 438 on behalf of all authors, a worldwide licence  
28 439 ([http://www.bmj.com/sites/default/files/BMJ%20Author%20Licence%20March%202013](http://www.bmj.com/sites/default/files/BMJ%20Author%20Licence%20March%202013.doc)  
29 440 [.doc](http://www.bmj.com/sites/default/files/BMJ%20Author%20Licence%20March%202013.doc)) to the Publishers and its licensees in perpetuity, in all forms, formats and media  
30 441 (whether known now or created in the future), to i) publish, reproduce, distribute, display  
31 442 and store the Contribution, ii) translate the Contribution into other languages, create  
32 443 adaptations, reprints, include within collections and create summaries, extracts and/or,  
33 444 abstracts of the Contribution and convert or allow conversion into any format including  
34 445 without limitation audio, iii) create any other derivative work(s) based in whole or part on  
35 446 the on the Contribution, iv) to exploit all subsidiary rights to exploit all subsidiary rights  
36 447 that currently exist or as may exist in the future in the Contribution, v) the inclusion of  
37 448 electronic links from the Contribution to third party material where-ever it may be  
38 449 located; and, vi) licence any third party to do any or all of the above. All research articles  
39 450 will be made available on an open access basis (with authors being asked to pay an open  
40 451 access fee—see [http://www.bmj.com/about-bmj/resources-authors/forms-policies-and-](http://www.bmj.com/about-bmj/resources-authors/forms-policies-and-checklists/copyright-open-access-and-permission-reuse)  
41 452 [checklists/copyright-open-access-and-permission-reuse](http://www.bmj.com/about-bmj/resources-authors/forms-policies-and-checklists/copyright-open-access-and-permission-reuse)). The terms of such open access  
42 453 shall be governed by a [Creative Commons](http://creativecommons.org/licenses/by/4.0/) licence—details as to which Creative  
43 454 Commons licence will apply to the research article are set out in our worldwide licence  
44 455 referred to above.

45  
46  
47  
48 456

49  
50  
51 457

### 52 458 **References**

53  
54  
55 459 1 Straus S, Glasziou P, Richardson W, *et al.* *Evidence-based medicine: How to*



- 1  
2  
3 460 *practice and teach it*. 4th ed. Edinburgh: Churchill Livingstone Elsevier 2011.  
4  
5 461 2 Institute of Medicine. *Clinical Practice Guidelines We Can Trust*. Washington,  
6  
7 D.C.: The National Academies Press 2011. doi:10.17226/13058  
8 462  
9  
10 463 3 Siering U, Eikermann M, Hausner E, *et al*. Appraisal Tools for Clinical Practice  
11  
12 464 Guidelines: A Systematic Review. *PLoS One* 2013;**8**:e82915.  
13  
14 465 doi:10.1371/journal.pone.0082915  
15  
16 466 4 Rotter T, Kinsman L, James EL, *et al*. Clinical pathways: effects on professional  
17  
18 467 practice, patient outcomes, length of stay and hospital costs. *Cochrane Database*  
19  
20 *Syst Rev* Published Online First: 17 March 2010.  
21  
22 468 doi:10.1002/14651858.CD006632.pub2  
23  
24 469  
25  
26 470 5 Zegers M, Hesselink G, Geense W, *et al*. Evidence-based interventions to reduce  
27  
28 471 adverse events in hospitals: a systematic review of systematic reviews. *BMJ Open*  
29  
30 472 2016;**6**:e012555. doi:10.1136/bmjopen-2016-012555  
31  
32  
33 473 6 Guyatt GH, Oxman AD, Kunz R, *et al*. What is “quality of evidence” and why is it  
34  
35 474 important to clinicians? *BMJ* 2008;**336**:995–8. doi:10.1136/bmj.39490.551019.BE  
36  
37 475 7 GRADE Working Group. GRADE Publications.  
38  
39 476 2020.<https://www.gradeworkinggroup.org/> (accessed 15 Aug 2020).  
40  
41  
42 477 8 Siemieniuk R. *Rapid Recommendations: Improving the efficiency and*  
43  
44 478 *trustworthiness of systematic reviews and guidelines*.  
45  
46 479 2020.[http://scholar.google.co.uk/scholar\\_url?url=https://macsphere.mcmaster.ca/bitstream/11375/25540/2/Thesis%2520Jul2020.pdf&hl=en&sa=X&d=5331624782467784167&scisig=AAGBfm30L0OQBDw\\_dCT5-](http://scholar.google.co.uk/scholar_url?url=https://macsphere.mcmaster.ca/bitstream/11375/25540/2/Thesis%2520Jul2020.pdf&hl=en&sa=X&d=5331624782467784167&scisig=AAGBfm30L0OQBDw_dCT5-muTPq8bj0GDug&nossl=1&oi=scholaralrt&hist=w-)  
47  
48  
49 480  
50  
51 481  
52  
53 482  
54  
55  
56  
57  
58  
59  
60

- 1  
2  
3 483 BFPUCAAA AJ:177921346899949028  
4  
5 484 9 NICE. National Institute for Health and Care Excellence: Improving health and  
6  
7  
8 485 social care through evidence-based guidance. <https://www.nice.org.uk/> (accessed 8  
9  
10 486 Jul 2020).
- 11  
12 487 10 SIGN. Scottish Intercollegiate Guidelines Network. <https://www.sign.ac.uk>  
13  
14 488 (accessed 14 Jul 2020).
- 15  
16  
17 489 11 Chamova J, Directorate-General for Health and Food Safety (European  
18  
19 490 Commission), Stellalliance AB. *Mapping of HTA national organisations,*  
20  
21 491 *programmes and processes in EU and Norway.* EU Publications 2018.  
22  
23 492 doi:10.2875/5065
- 24  
25  
26 493 12 WHO. Health Technology Assessment: International HTA networks.  
27  
28 494 <https://www.who.int/health-technology-assessment/networks/en/> (accessed 16 Jul  
29  
30 495 2020).
- 31  
32  
33 496 13 Lenzer J. Why we can't trust clinical guidelines. *BMJ* 2013;**346**:f3830–f3830.  
34  
35 497 doi:10.1136/bmj.f3830
- 36  
37  
38 498 14 WHO. WHO/Europe brief – transgender health in the context of ICD-11.  
39  
40 499 [https://www.euro.who.int/en/health-topics/health-determinants/gender/gender-](https://www.euro.who.int/en/health-topics/health-determinants/gender/gender-definitions/whoeurope-brief-transgender-health-in-the-context-of-icd-11)  
41  
42 500 [definitions/whoeurope-brief-transgender-health-in-the-context-of-icd-11](https://www.euro.who.int/en/health-topics/health-determinants/gender/gender-definitions/whoeurope-brief-transgender-health-in-the-context-of-icd-11) (accessed  
43  
44 501 16 Jul 2020).
- 45  
46  
47 502 15 WHO. Genomic Resource Centre: Gender and Genetics.  
48  
49 503 2016.<https://www.who.int/genomics/gender/en/> (accessed 16 Jul 2020).
- 50  
51 504 16 Reisner SL, Poteat T, Keatley J, *et al.* Global health burden and needs of  
52  
53 505 transgender populations: a review. *Lancet* 2016;**388**:412–36. doi:10.1016/S0140-

- 1  
2  
3 506 6736(16)00684-X  
4  
5 507 17 Winter S, Diamond M, Green J, *et al.* Transgender people: health at the margins of  
6  
7 society. *Lancet* 2016;**388**:390–400. doi:10.1016/S0140-6736(16)00683-8  
8  
9 508  
10 509 18 World Health Organization. *ICD-10 : international statistical classification of*  
11  
12 510 *diseases and related health problems : tenth revision.* 2nd ed. World Health  
13  
14 511 Organization 2004. <https://apps.who.int/iris/handle/10665/42980>  
15  
16 512 19 World Health Organisation. *International classification of diseases, eleventh*  
17  
18 513 *revision (ICD-11).* 2018. <http://id.who.int/icd/entity/411470068>  
19  
20 514 20 Coleman E, Bockting W, Botzer M, *et al.* Standards of Care for the Health of  
21  
22 515 Transsexual, Transgender, and Gender-Nonconforming People, Version 7. *Int J*  
23  
24 516 *Transgenderism* 2012;**13**:165–232. doi:10.1080/15532739.2011.700873  
25  
26 517 21 Wylie K, Knudson G, Khan SI, *et al.* Serving transgender people: clinical care  
27  
28 518 considerations and service delivery models in transgender health. *Lancet*  
29  
30 519 2016;**388**:401–11. doi:10.1016/S0140-6736(16)00682-6  
31  
32 520 22 Drydakis N. Trans employees, transitioning, and job satisfaction. *J Vocat Behav*  
33  
34 521 2017;**98**:1–16. doi:10.1016/j.jvb.2016.09.003  
35  
36 522 23 Torjesen I. Trans health needs more and better services: increasing capacity,  
37  
38 523 expertise, and integration. *BMJ* 2018;**362**:k3371. doi:10.1136/bmj.k3371  
39  
40 524 24 Butler G, Graaf N De, Wren B, *et al.* Assessment and support of children and  
41  
42 525 adolescents with gender dysphoria. *Arch Dis Child* 2018;**103**:631–6.  
43  
44 526 doi:10.1136/archdischild-2018-314992  
45  
46 527 25 Kaltiala-Heino R, Bergman H, Työläjäarvi M, *et al.* Gender dysphoria in  
47  
48 528 adolescence: current perspectives. *Adolesc Health Med Ther* 2018;**9**:31–41.  
49  
50  
51  
52  
53  
54  
55  
56  
57  
58  
59  
60

- 1  
2  
3 529 doi:10.2147/AHMT.S135432  
4  
5 530 26 Freitas LD, Léda-Rêgo G, Bezerra-Filho S, *et al.* Psychiatric disorders in  
6  
7  
8 531 individuals diagnosed with gender dysphoria: A systematic review. *Psychiatry*  
9  
10 532 *Clin Neurosci* 2020;**74**:99–104. doi:10.1111/pcn.12947  
11  
12 533 27 Connolly D, Davies E, Lynskey M, *et al.* Comparing intentions to reduce  
13  
14 534 substance use and willingness to seek help among transgender and cisgender  
15  
16 535 participants from the Global Drug Survey. *J Subst Abuse Treat* 2020;**112**:86–91.  
17  
18 536 doi:10.1016/j.jsat.2020.03.001  
19  
20 537 28 Clements-Nolle K, Marx R, Katz M. Attempted Suicide Among Transgender  
21  
22 538 Persons. *J Homosex* 2006;**51**:53–69. doi:10.1300/J082v51n03\_04  
23  
24 539 29 Fredriksen-Goldsen KI, Cook-Daniels L, Kim H-J, *et al.* Physical and Mental  
25  
26 540 Health of Transgender Older Adults: An At-Risk and Underserved Population.  
27  
28 541 *Gerontologist* 2014;**54**:488–500. doi:10.1093/geront/gnt021  
29  
30 542 30 Catelan RF, Costa AB, de Macedo Lisboa CS. Psychological Interventions for  
31  
32 543 Transgender Persons: A Scoping Review. *Int J Sex Heal* 2017;**29**:325–37.  
33  
34 544 doi:10.1080/19317611.2017.1360432  
35  
36 545 31 Glynn TR, van den Berg JJ. A Systematic Review of Interventions to Reduce  
37  
38 546 Problematic Substance Use Among Transgender Individuals: A Call to Action.  
39  
40 547 *Transgender Heal* 2017;**2**:45–59. doi:10.1089/trgh.2016.0037  
41  
42 548 32 Poteat T, Reisner SL, Radix A. HIV epidemics among transgender women. *Curr*  
43  
44 549 *Opin HIV AIDS* 2014;**9**:168–73. doi:10.1097/COH.0000000000000030  
45  
46 550 33 James SE, Herman JL, Rankin S, *et al.* *The report of the US Transgender Survey*  
47  
48 551 *2015*. Washington, D.C.: National Center for Healthcare Equality 2016.  
49  
50  
51  
52  
53  
54  
55  
56  
57  
58  
59  
60

- 1  
2  
3 552 <https://www.transequality.org/sites/default/files/docs/USTS-Full-Report->  
4  
5 553 FINAL.PDF  
6  
7  
8 554 34 Bockting WO, Miner MH, Romine RES, *et al.* Stigma, Mental Health, and  
9  
10 555 Resilience in an Online Sample of the US Transgender Population. *Am J Public*  
11  
12 556 *Health* 2013;**103**:943–51. doi:10.2105/AJPH.2013.301241  
13  
14 557 35 OHCHR. Discrimination and violence against individuals based on their sexual  
15  
16 558 orientation and gender identity. 2015.  
17  
18 559 [https://ap.ohchr.org/documents/dpage\\_e.aspx?si=A/HRC/29/23](https://ap.ohchr.org/documents/dpage_e.aspx?si=A/HRC/29/23)  
19  
20  
21 560 36 Waldman CR. Transgender Medicine in the Path to Progress and Human Rights.  
22  
23 561 *AMA J Ethics* 2016;**18**:1067–9. doi:10.1001/journalofethics.2016.18.11.fred1-1611  
24  
25  
26 562 37 Deutsch M, Radix A, Reisner S. What’s in a Guideline? Developing Collaborative  
27  
28 563 and Sound Research Designs that Substantiate Best Practice Recommendations for  
29  
30 564 Transgender Health Care. *AMA J Ethics* 2016;**18**:1098–106.  
31  
32 565 doi:10.1001/journalofethics.2016.18.11.stas1-1611  
33  
34  
35 566 38 Development and validation of an international appraisal instrument for assessing  
36  
37 567 the quality of clinical practice guidelines: the AGREE project. *Qual Saf Heal Care*  
38  
39 568 2003;**12**:18–23. doi:10.1136/qhc.12.1.18  
40  
41  
42 569 39 Brouwers MC, Kho ME, Browman GP, *et al.* AGREE II: advancing guideline  
43  
44 570 development, reporting and evaluation in health care. *Can Med Assoc J*  
45  
46 571 2010;**182**:E839–42. doi:10.1503/cmaj.090449  
47  
48  
49 572 40 Hoffmann-Eßer W, Siering U, Neugebauer EAM, *et al.* Guideline appraisal with  
50  
51 573 AGREE II: Systematic review of the current evidence on how users handle the 2  
52  
53 574 overall assessments. *PLoS One* 2017;**12**:e0174831.  
54  
55  
56  
57  
58  
59  
60

- 1  
2  
3 575 doi:10.1371/journal.pone.0174831  
4  
5 576 41 AGREE Next Steps Consortium. The AGREE II Instrument [Electronic version].  
6  
7 577 2017.<http://www.agreetrust.org> (accessed 14 Jul 2020).  
8  
9  
10 578 42 Scottish Intercollegiate Guidelines Network. What Are Guidelines? Sign.  
11  
12 579 <https://www.sign.ac.uk/what-are-guidelines> (accessed 16 Jul 2020).  
13  
14 580 43 National Institute for Health and Care Excellence. How NICE clinical guidelines  
15  
16 581 are developed: an overview for stakeholders, the public and the NHS. NICE. 2012.  
17  
18 582 44 Institute of Medicine. *Guidelines for Clinical Practice: From Development to Use*.  
19  
20 583 Washington, D.C.: The National Academies Press 1992. doi:10.17226/1863  
21  
22 584 45 Moher D, Liberati A, Tetzlaff J, *et al*. Preferred Reporting Items for Systematic  
23  
24 585 Reviews and Meta-Analyses: The PRISMA Statement. *PLoS Med*  
25  
26 586 2009;**6**:e1000097. doi:10.1371/journal.pmed.1000097  
27  
28 587 46 WHO. *Prevention and treatment of HIV and other sexually transmitted infections*  
29  
30 588 *among men who have sex with men and transgender people: recommendations for*  
31  
32 589 *a public health approach*. Geneva: World Health Organization 2011.  
33  
34 590 [https://www.who.int/hiv/pub/guidelines/msm\\_guidelines2011/en/](https://www.who.int/hiv/pub/guidelines/msm_guidelines2011/en/)  
35  
36 591 47 WHO. *Guidance on oral pre-exposure prophylaxis (PrEP) for serodiscordant*  
37  
38 592 *couples, men and transgender women who have sex with men at high risk of HIV:*  
39  
40 593 *recommendations for use in the context of demonstration projects*. Geneva: World  
41  
42 594 Health Organization 2012. [https://www.who.int/hiv/pub/guidance\\_prep/en/](https://www.who.int/hiv/pub/guidance_prep/en/)  
43  
44 595 48 WHO. *Consolidated guidelines on HIV prevention, diagnosis, treatment and care*  
45  
46 596 *for key populations, 2016 update*. Geneva: World Health Organization 2016.  
47  
48 597 <http://www.who.int/hiv/pub/guidelines/keypopulations/>  
49  
50  
51  
52  
53  
54  
55  
56  
57  
58  
59  
60

- 1  
2  
3 598 49 Davies S, Papp VG, Antoni C. Voice and Communication Change for Gender  
4  
5 599 Nonconforming Individuals: Giving Voice to the Person Inside. *Int J*  
6  
7 600 *Transgenderism* 2015;**16**:117–59. doi:10.1080/15532739.2015.1075931  
8  
9  
10 601 50 Gilligan T, Coyle N, Frankel RM, *et al.* Patient-Clinician Communication:  
11  
12 602 American Society of Clinical Oncology Consensus Guideline. *J Clin Oncol*  
13  
14 603 2017;**35**:3618–32. doi:10.1200/JCO.2017.75.2311  
15  
16  
17 604 51 Hembree WC, Cohen-Kettenis PT, Gooren L, *et al.* Endocrine treatment of gender-  
18  
19 605 dysphoric/ gender-incongruent persons: An endocrine society\*clinical practice  
20  
21 606 guideline. *J Clin Endocrinol Metab* 2017;**102**:3869–903. doi:10.1210/jc.2017-  
22  
23 607 01658  
24  
25  
26 608 52 IAPAC Guidelines for Optimizing the HIV Care Continuum for Adults and  
27  
28 609 Adolescents. *J Int Assoc Provid AIDS Care* 2015;**14**:S3–34.  
29  
30 610 doi:10.1177/2325957415613442  
31  
32  
33 611 53 T’Sjoen G, Arcelus J, De Vries ALC, *et al.* European Society for Sexual Medicine  
34  
35 612 Position Statement “Assessment and Hormonal Management in Adolescent and  
36  
37 613 Adult Trans People, With Attention for Sexual Function and Satisfaction”. *J Sex*  
38  
39 614 *Med* 2020;**17**:570–84. doi:10.1016/j.jsxm.2020.01.012  
40  
41  
42 615 54 Ralph D, Gonzalez-Cadavid N, Mirone V, *et al.* Trauma, Gender Reassignment,  
43  
44 616 and Penile Augmentation. *J Sex Med* 2010;**7**:1657–67. doi:10.1111/j.1743-  
45  
46 617 6109.2010.01781.x  
47  
48  
49 618 55 Strang JF, Meagher H, Kenworthy L, *et al.* Initial Clinical Guidelines for Co-  
50  
51 619 Occurring Autism Spectrum Disorder and Gender Dysphoria or Incongruence in  
52  
53 620 Adolescents. *J Clin Child Adolesc Psychol* 2018;**47**:105–15.  
54  
55  
56  
57  
58  
59  
60

- 1  
2  
3 621 doi:10.1080/15374416.2016.1228462  
4  
5 622 56 ECDC. *European Centre for Disease Prevention and Control. Public health*  
6  
7 623 *guidance on HIV, hepatitis B and C testing in the EU/EEA: An integrated*  
8  
9 624 *approach*. Stockholm: 2018. doi:10.2900/79127  
10  
11  
12 625 57 Jungwirth, A; Diemer, T; Kopa, Z; Krausz, C; Minhas, S; Tournaye H. *EAU*  
13  
14 626 *Guidelines on Male Infertility*. European Association of Urology 2018.  
15  
16 627 <https://uroweb.org/guideline/male-infertility/>  
17  
18  
19 628 58 Ngaage LM, Knighton BJ, McGlone KL, *et al*. Health Insurance Coverage of  
20  
21 629 Gender-Affirming Top Surgery in the United States. *Plast Reconstr Surg*  
22  
23 630 2019;**144**:824–33. doi:10.1097/PRS.0000000000006012  
24  
25  
26 631 59 Thoreson N, Marks DH, Peebles JK, *et al*. Health Insurance Coverage of  
27  
28 632 Permanent Hair Removal in Transgender and Gender-Minority Patients. *JAMA*  
29  
30 633 *Dermatology* 2020;**156**:561. doi:10.1001/jamadermatol.2020.0480  
31  
32  
33 634 60 Solotke MT, Liu P, Dhruva SS, *et al*. Medicare Prescription Drug Plan Coverage  
34  
35 635 of Hormone Therapies Used by Transgender Individuals. *LGBT Heal* 2020;**7**:137–  
36  
37 636 45. doi:10.1089/lgbt.2019.0306  
38  
39  
40 637 61 Fraser L, Knudson G. Past and Future Challenges Associated with Standards of  
41  
42 638 Care for Gender Transitioning Clients. *Psychiatr Clin North Am* 2017;**40**:15–27.  
43  
44 639 doi:10.1016/j.psc.2016.10.012  
45  
46  
47 640 62 Shuster S. Uncertain Expertise and the Limitations of Clinical Guidelines in  
48  
49 641 Transgender Healthcare. *J Health Soc Behav* 2016;**57**:319–32.  
50  
51 642 doi:10.1177/0022146516660343  
52  
53  
54 643 63 Velho I, Figuera TM, Ziegelmann PK, *et al*. Effects of testosterone therapy on  
55  
56  
57  
58  
59  
60



- 1  
2  
3 644 BMI, blood pressure, and laboratory profile of transgender men: a systematic  
4  
5 645 review. *Andrology* 2017;**5**:881–8. doi:10.1111/andr.12382  
6  
7  
8 646 64 Maraka S, Singh Ospina N, Rodriguez-Gutierrez R, *et al.* Sex Steroids and  
9  
10 647 Cardiovascular Outcomes in Transgender Individuals: A Systematic Review and  
11  
12 648 Meta-Analysis. *J Clin Endocrinol Metab* 2017;**102**:3914–23. doi:10.1210/jc.2017-  
13  
14 649 01643  
15  
16  
17 650 65 Connolly D, Hughes X, Berner A. Barriers and facilitators to cervical cancer  
18  
19 651 screening among transgender men and non-binary people with a cervix: A  
20  
21 652 systematic narrative review. *Prev Med* 2020;**135**:106071.  
22  
23 653 doi:10.1016/j.ypmed.2020.106071  
24  
25  
26 654 66 Burgers JS, Fervers B, Haugh M, *et al.* International assessment of the quality of  
27  
28 655 clinical practice guidelines in oncology using the appraisal of guidelines and  
29  
30 656 research and evaluation instrument. *J Clin Oncol* 2004;**22**:2000–7.  
31  
32 657 doi:10.1200/JCO.2004.06.157  
33  
34  
35 658 67 Lei X, Liu F, Luo S, *et al.* Evaluation of guidelines regarding surgical treatment of  
36  
37 659 breast cancer using the AGREE Instrument: A systematic review. *BMJ Open*  
38  
39 660 2017;**7**:1–11. doi:10.1136/bmjopen-2016-014883  
40  
41  
42 661 68 Wayant C, Cooper C, Turner D, *et al.* Evaluation of the NCCN guidelines using  
43  
44 662 the RIGHT Statement and AGREE-II instrument: a cross-sectional review. *BMJ*  
45  
46 663 *Evidence-Based Med* 2019;**24**:219–26. doi:10.1136/bmjebm-2018-111153  
47  
48  
49 664 69 Bhatt M, Nahari A, Wang P-W, *et al.* The quality of clinical practice guidelines for  
50  
51 665 management of pediatric type 2 diabetes mellitus: a systematic review using the  
52  
53 666 AGREE II instrument. *Syst Rev* 2018;**7**:193. doi:10.1186/s13643-018-0843-1  
54  
55  
56  
57  
58  
59

- 1  
2  
3 667 70 Anwer MA, Al-Fahed OB, Arif SI, *et al.* Quality assessment of recent  
4  
5  
6 668 evidence-based clinical practice guidelines for management of type 2 diabetes  
7  
8  
9 669 mellitus in adults using the AGREE II instrument. *J Eval Clin Pract* 2018;**24**:166–  
10  
11 670 72. doi:10.1111/jep.12785  
12  
13 671 71 Bazzano AN, Green E, Madison A, *et al.* Assessment of the quality and content of  
14  
15 672 national and international guidelines on hypertensive disorders of pregnancy using  
16  
17 673 the AGREE II instrument. *BMJ Open* 2016;**6**:e009189. doi:10.1136/bmjopen-  
18  
19 674 2015-009189  
20  
21  
22 675 72 Greuter MJE, van Emmerik NMA, Wouters MGJ, *et al.* Quality of guidelines on  
23  
24 676 the management of diabetes in pregnancy: a systematic review. *BMC Pregnancy*  
25  
26 677 *Childbirth* 2012;**12**. doi:10.1186/1471-2393-12-58  
27  
28  
29 678 73 MacQueen G, Santaguida P, Keshavarz H, *et al.* Systematic Review of Clinical  
30  
31 679 Practice Guidelines for Failed Antidepressant Treatment Response in Major  
32  
33 680 Depressive Disorder, Dysthymia, and Subthreshold Depression in Adults. *Can J*  
34  
35 681 *Psychiatry* 2017;**62**:11–23. doi:10.1177/0706743716664885  
36  
37  
38 682 74 Alonso-Coello P, Irfan A, Sola I, *et al.* The quality of clinical practice guidelines  
39  
40 683 over the last two decades: a systematic review of guideline appraisal studies. *BMJ*  
41  
42 684 *Qual Saf* 2010;**19**:e58–e58. doi:10.1136/qshc.2010.042077  
43  
44  
45 685 75 Bewley S. What inhibits obstetricians implementing reliable guidelines? *BJOG An*  
46  
47 686 *Int J Obstet Gynaecol* 2020;**127**:798. doi:10.1111/1471-0528.16177  
48  
49  
50 687 76 Grilli R, Magrini N, Penna A, *et al.* Practice guidelines developed by specialty  
51  
52 688 societies: the need for a critical appraisal. *Lancet* 2000;**355**:103–6.  
53  
54 689 doi:10.1016/S0140-6736(99)02171-6  
55  
56  
57  
58  
59

- 1  
2  
3 690 77 Ioannidis JPA. Professional Societies Should Abstain From Authorship of  
4  
5 691 Guidelines and Disease Definition Statements. *Circ Cardiovasc Qual Outcomes*  
6  
7 692 2018;**11**. doi:10.1161/CIRCOUTCOMES.118.004889  
8  
9  
10 693 78 Ioannidis JPA. Guidelines Do Not Entangle Practitioners With Unavoidable  
11  
12 694 Conflicts as Authors, and When There Is No Evidence, Just Say So. *Circ*  
13  
14 695 *Cardiovasc Qual Outcomes* 2018;**11**. doi:10.1161/CIRCOUTCOMES.118.005205  
15  
16  
17 696 79 Dunford C, Gresty H, Takhar M, *et al*. Transgender and adolescence: Is online  
18  
19 697 information accurate or mis-leading? *Eur Urol Suppl* 2019;**18**:e1782.  
20  
21 698 doi:10.1016/S1569-9056(19)31291-6  
22  
23  
24 699 80 Royal College of Physicians. Gender Identity Healthcare Credentials (GIH). RCP  
25  
26 700 London. [https://www.rcplondon.ac.uk/education-practice/courses/gender-identity-](https://www.rcplondon.ac.uk/education-practice/courses/gender-identity-healthcare-credentials-gih)  
27  
28 701 [healthcare-credentials-gih](https://www.rcplondon.ac.uk/education-practice/courses/gender-identity-healthcare-credentials-gih) (accessed 8 Jul 2020).  
29  
30  
31 702 81 WHO. *Consolidated guideline on sexual and reproductive health and rights of*  
32  
33 703 *women living with HIV*. Geneva: World Health Organization 2017.  
34  
35  
36 704 82 Narasimhan M, Orza L, Welbourn A, *et al*. Sexual and reproductive health and  
37  
38 705 human rights of women living with HIV: a global community survey. *Bull World*  
39  
40 706 *Health Organ* 2016;**94**:243–9. doi:10.2471/BLT.14.150912  
41  
42  
43 707 83 Oliphant J, Veale J, Macdonald J, *et al*. Guidelines for Gender Affirming  
44  
45 708 Healthcare for Gender Diverse and Transgender Children, Young People and  
46  
47 709 Adults in Aotearoa, New Zealand. *N Z Med J* 2018;**131**:86–  
48  
49 710 96.<http://www.ncbi.nlm.nih.gov/pubmed/30543615>  
50  
51  
52 711 84 Nieder TO, Strauss B. Transgender health care in Germany: Participatory  
53  
54 712 approaches and the development of a guideline. *Int Rev Psychiatry* 2015;**27**:416–

- 1  
2  
3 713 26. doi:10.3109/09540261.2015.1074562  
4  
5 714 85 Fisher AD, Ristori J, Bandini E, *et al.* Medical treatment in gender dysphoric  
6  
7 715 adolescents endorsed by SIAMS–SIE–SIEDP–ONIG. *J Endocrinol Invest*  
8  
9 716 2014;**37**:675–87. doi:10.1007/s40618-014-0077-6  
10  
11  
12 717 86 James Lind Alliance. About Priority Setting Partnerships.  
13  
14 718 <http://www.jla.nihr.ac.uk/about-the-james-lind-alliance/about-psps.htm> (accessed 8  
15  
16 719 Jul 2020).  
17  
18  
19 720 87 Cochrane. Cochrane: Trusted evidence. Informed decisions. Better health.  
20  
21 721 <https://www.cochrane.org/> (accessed 8 Jul 2020).  
22  
23 722 88 MAGIC (Making GRADE the Irresistible Choice). MAGIC: Evidence, Ecosystem,  
24  
25 723 Foundation. [www.magicproject.org](http://www.magicproject.org) (accessed 8 Jul 2020).  
26  
27 724 89 National Institute for Health and Care Excellence. Accreditation. NICE.  
28  
29 725 <https://www.nice.org.uk/about/what-we-do/accreditation> (accessed 8 Jul 2020).  
30  
31 726 90 BAGIS. British Association of Gender Identity Specialists.  
32  
33 727 <https://www.bagis.co.uk/> (accessed 8 Jul 2020).  
34  
35 728 91 Hendricks ML, Testa RJ. A conceptual framework for clinical work with  
36  
37 729 transgender and gender nonconforming clients: An adaptation of the Minority  
38  
39 730 Stress Model. *Prof Psychol Res Pract* 2012;**43**:460–7. doi:10.1037/a0029597  
40  
41  
42 731 92 Harding Center for Risk Literacy. Fact boxes.  
43  
44 732 <https://www.hardingcenter.de/en/fact-boxes> (accessed 8 Jul 2020).  
45  
46 733 93 Winton Centre for Risk and Evidence Communication.  
47  
48 734 <https://wintoncentre.maths.cam.ac.uk/> (accessed 8 Jul 2020).  
49  
50  
51  
52  
53  
54 735  
55  
56  
57  
58  
59  
60

1  
2  
3 **International Clinical Practice Guidelines for Gender Minority/Trans People:**  
4  
5 **Systematic Review and Quality Assessment**  
6  
7  
8  
9

10 **Tables and figures list**  
11

12 Figure 1. PRISMA flow diagram  
13

14 Table 1. Characteristics of included Clinical Practice Guidelines (primary outcome)  
15

16 Table 2. Quality scoring using AGREE II (secondary outcomes)  
17  
18  
19  
20  
21  
22  
23  
24  
25  
26  
27  
28  
29  
30  
31  
32  
33  
34  
35  
36  
37  
38  
39  
40  
41  
42  
43  
44  
45  
46  
47  
48  
49  
50  
51  
52  
53  
54  
55  
56  
57  
58  
59  
60

**Figure 1 – PRISMA flow diagram**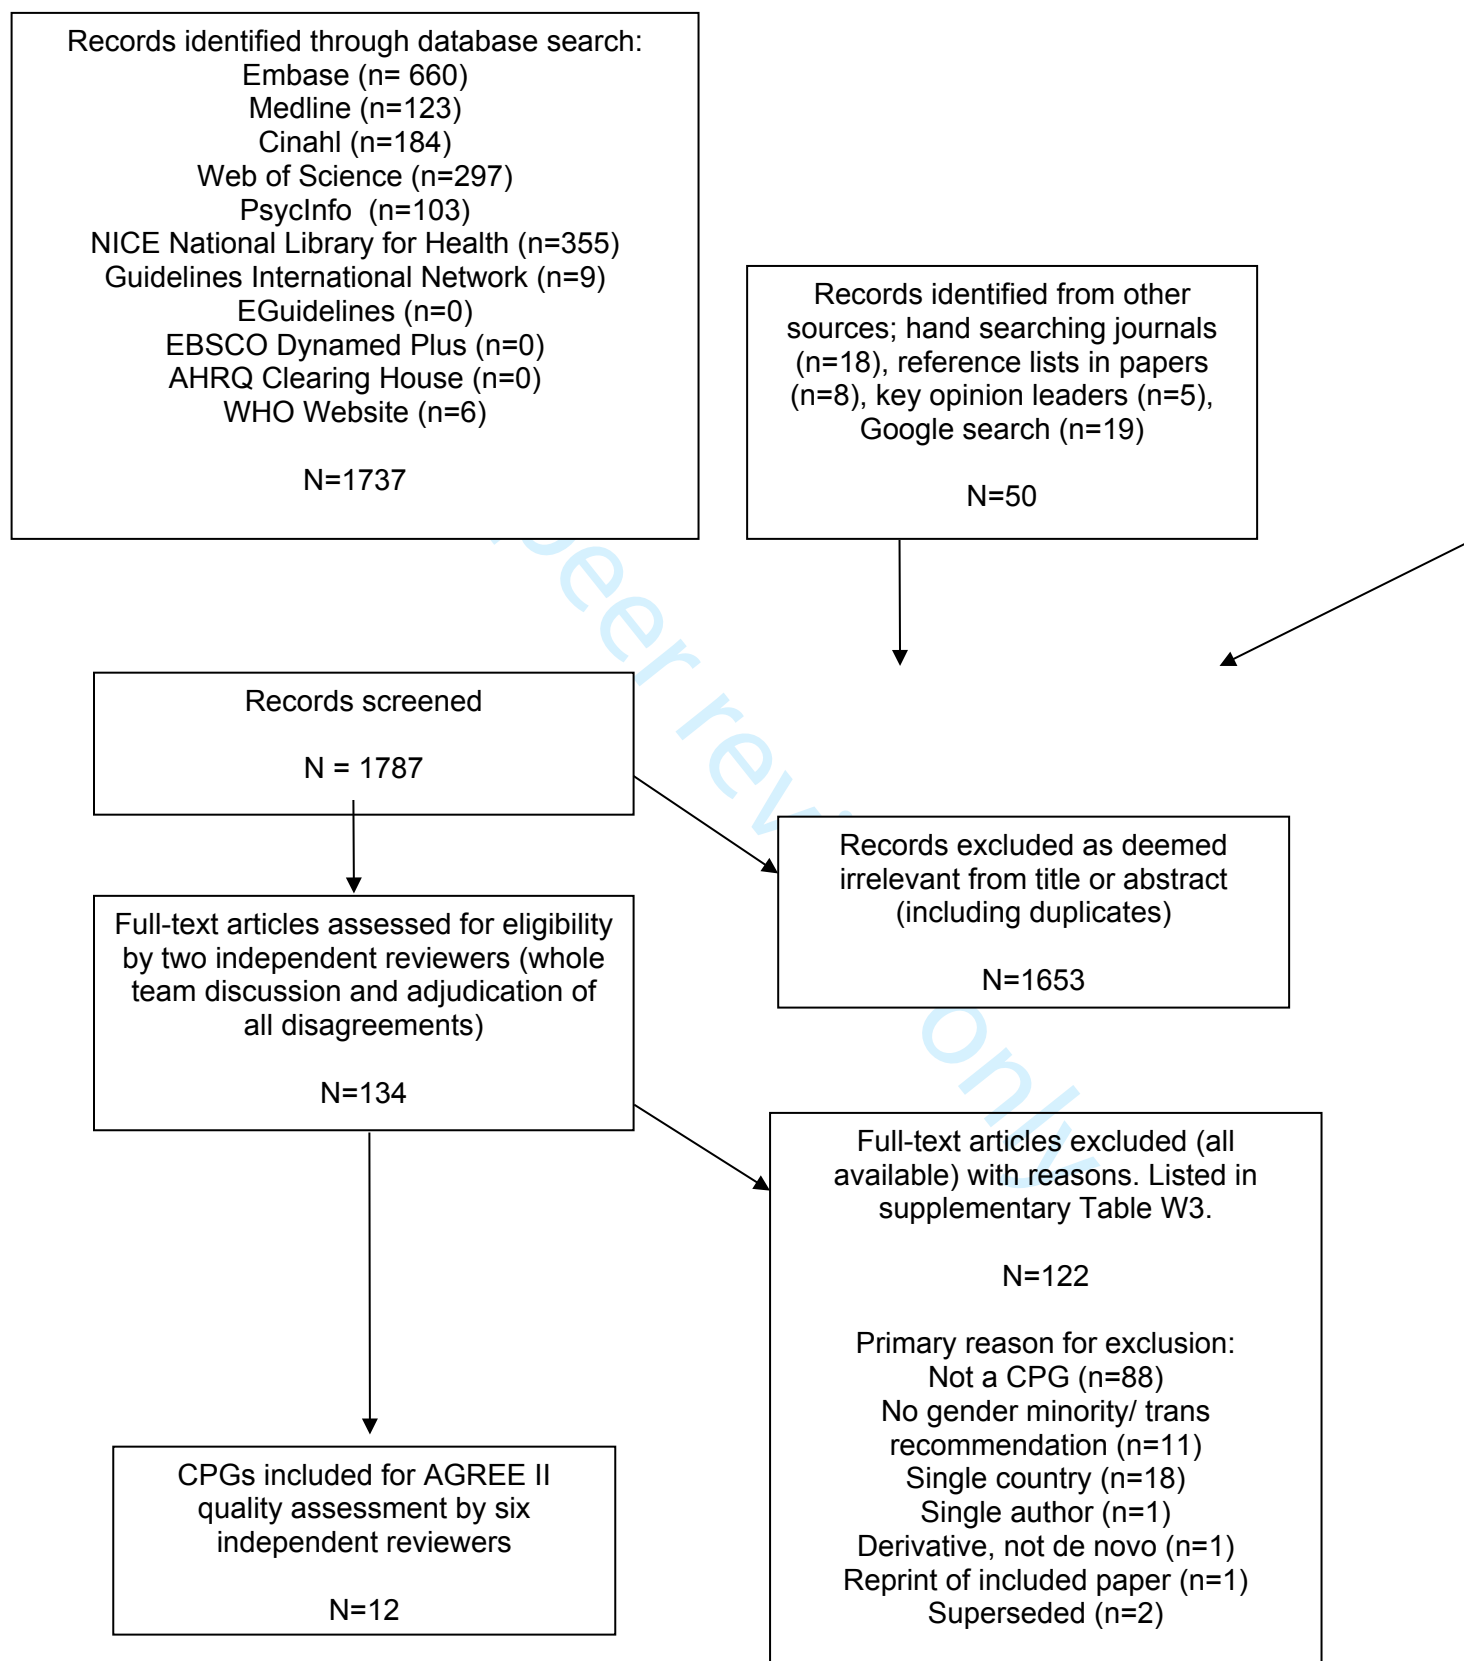

**Table 1. General characteristics of included Clinical Practice Guidelines (n = 12) (Primary outcome)**

| Number | Author (year)          | Full title                                                                                                            | Countries covered                         | Origin                                   | Primary Audience                                                                                                                                                           | Design (systematic review, SR, used and methods thereafter)                                                                                                          | Planned update given      | Funding                                                           |
|--------|------------------------|-----------------------------------------------------------------------------------------------------------------------|-------------------------------------------|------------------------------------------|----------------------------------------------------------------------------------------------------------------------------------------------------------------------------|----------------------------------------------------------------------------------------------------------------------------------------------------------------------|---------------------------|-------------------------------------------------------------------|
| 10     | Coleman et al. (2012)  | Standards of care for the health of transsexual, transgender, and gender nonconforming people v7                      | Global                                    | WPATH                                    | Health professionals                                                                                                                                                       | Work groups submit manuscripts based on prior literature reviews, no explicit links of recommendations to evidence, expert consensus. No independent external review | No                        | Tawani Foundation and gift from anonymous donor                   |
| 15     | Davies et al. (2015)   | Voice and communication change for gender nonconforming individuals: giving voice to the person inside                | Global                                    | WPATH                                    | Speech-language therapists                                                                                                                                                 | Review of evidence. Expert consensus. No independent external review                                                                                                 | No                        | Transgender Health Information Program of British Columbia Canada |
| 19     | ECDC (2018)            | Public health guidance on HIV, hepatitis B and C testing in the EU/EEA                                                | EU/ EEA                                   | ECDC consortium CHIP, PHE, SSAT and EATG | Member States' Public Health Professionals who coordinate the development of national guidelines or programmes for HBV, HCV and HIV testing                                | 4 SRs, SIGN, NICE and AXIS checklists. Ad hoc internal and external expert panel, independent chair, expert consensus. No independent external review                | No                        | Commissioned by ECDC, contractor Rigshospitalet CHIP              |
| 25     | Gilligan et al. (2017) | Patient-clinician communication: American Society of Clinical Oncology consensus guideline                            | USA and others                            | ASCO                                     | Clinicians who care for adults with cancer                                                                                                                                 | 9 questions (1 SR), expert consensus and a Delphi exercise. No independent external review                                                                           | Regular review 3 yr check | None declared                                                     |
| 29     | Hembree et al. (2017)  | Endocrine treatment of gender-dysphoric/ gender-incongruent persons: An Endocrine Society clinical practice guideline | Global                                    | Endocrine Society                        | Endocrinologists, trained mental health professionals and trained physicians                                                                                               | 2 SRs and GRADE, rest expert consensus. No independent external review                                                                                               | No                        | Endocrine Society                                                 |
| 33     | IAPHCCO (2015)         | IAPAC Guidelines for optimizing the HIV care continuum for adults and adolescents                                     | Global                                    | IAPAC                                    | Care providers, program managers, policymakers, affected communities, organizations, and health systems involved with implementing HIV programs and/or delivering HIV care | A systematic search of CDC database, expert consensus. No independent external review                                                                                | No                        | IAPAC, US NIH and Office of AIDS Research                         |
| 39     | Ralph et al. (2010)    | Trauma, gender reassignment and penile augmentation                                                                   | Not specified (international publication) | Author group                             | Not stated (urological surgeons)                                                                                                                                           | No SR. Unclear if literature review. Leading experts' consensus opinion. No independent external review                                                              | No                        | None declared                                                     |

1

|    |                      |                                                                                                                                                                                                             |                                           |              |                                                                                                                                                                      |                                                                                                           |                            |                                               |
|----|----------------------|-------------------------------------------------------------------------------------------------------------------------------------------------------------------------------------------------------------|-------------------------------------------|--------------|----------------------------------------------------------------------------------------------------------------------------------------------------------------------|-----------------------------------------------------------------------------------------------------------|----------------------------|-----------------------------------------------|
| 28 | Strang et al. (2016) | Initial clinical guidelines for co-occurring autism spectrum disorder and gender dysphoria or incongruence in adolescents                                                                                   | Not specified (international publication) | Author group | Clinicians                                                                                                                                                           | No SR or literature review. 2-stage Delphi consensus. No independent external review                      | No                         | Isadore and Bertha Gudelsky Family Foundation |
| 69 | T'SJoen              | ESSM Position Statement "Assessment and hormonal management in adolescent and adult trans people, with attention for sexual function and satisfaction"                                                      | Europe                                    | ESSM         | European clinicians working in transgender health, sexologists and other health-care professionals                                                                   | No SR. Leading experts' consensus opinion. No independent external review                                 | No                         | ESSM                                          |
| 10 | WHO (2011)           | Prevention and treatment of HIV and other sexually transmitted infections among men who have sex with men and transgender people. Recommendations for a public health approach                              | Global                                    | WHO          | National public health officials and managers of HIV/AIDS and STI programmes, NGOs inc. community and civil society organizations, and health workers                | 13 SRs for PICOs and GRADE, external GDG, and independent external review                                 | Yes in 2015                | BMZ & PEPFAR through CDC & USAID              |
| 16 | WHO (2012)           | Guidance on oral pre-exposure prophylaxis for serodiscordant couples, men and transgender women who have sex with men at high risk of HIV. Recommendations for use in the context of demonstration projects | Global                                    | WHO          | Countries/ Member States                                                                                                                                             | 4 SRs (inc values and preferences reviews) and GRADE, external GDG, and independent external review group | Yes in 2015                | Bill and Melinda Gates Foundation             |
| 22 | WHO (2016)           | Consolidated guidelines on HIV prevention, diagnosis, treatment and care for key populations. 2016 update                                                                                                   | Global                                    | WHO          | National HIV programme managers and other decision-makers within ministries of health and those responsible for health policies, programmes and services in prisons. | 2 new SRs in revised guidance, GRADE, external GDGs, and 79 independent external peer reviewers           | Regular updates; no detail | UNAIDS, PEPFAR, Global Fund                   |

**Key:** AACE, American Association of Clinical Endocrinologists; ASA, American Society of Andrology; ASCO, American Society of Clinical Oncology; ASD, autism spectrum disorder; AXIS, Appraisal Tool for Cross-Sectional Studies; BMZ, German Federal Ministry for Economic Cooperation and Development; CDC, the Centers for Disease Control and Prevention; CHIP, CHIP/Region H, Rigshospitalet, University of Copenhagen; CPG, clinical practice guideline; EATG, European Aids Treatment Group; EAU, European Association of Urology; ECDC, European Centre for Disease Prevention and Control; ESE, European Society of Endocrinology; ESPE, European Society for Pediatric Endocrinology; ESSM, European Society for Sexual Medicine EU/EEA, European Union/ European Economic Area; Global Fund, Global Fund to Fight AIDS, Tuberculosis and Malaria; GDG, guideline development group; GRADE, Grading of Recommendations, Assessment, Development, and Evaluation; IAPAC, International Association of Providers of AIDS Care; IAPHCCO, International advisory panel on HIV care continuum optimization; NGO non governmental organisations; NICE, National Institute of Health and Care Excellence; NIH, National Institutes of Health; PEPFAR, US President's Emergency Plan for AIDS Relief; PES Pediatric Endocrine Society; PHE, Public Health England; SIGN, Scottish Intercollegiate Guidelines Network; SR, systematic review; SSAT, St Stephen's AIDS Trust; UNAIDS, The Unified Budget, Results and Accountability Framework of the Joint United Nations Programme on HIV/AIDS; USA, United States of America; USAID, US Agency for International Development; WHO, World Health Association; WPATH, World Professional Association for Transgender Health.



**Table 2. AGREE II domain percentages and overall assessment of included guidelines, mortality/QoL measures, and existence of patient facing messages (n = 12) (secondary outcomes)**

| Number | Author (year)          | Scope and purpose | Stakeholder involvement | Rigour of development | Clarity and presentation | Applicability | Editorial independence | Overall Assessment | Recommendation to use       | Mortality | Quality of Life | Mortality (any comment) and Quality of Life (any formal measure)                                                                                                                                  |
|--------|------------------------|-------------------|-------------------------|-----------------------|--------------------------|---------------|------------------------|--------------------|-----------------------------|-----------|-----------------|---------------------------------------------------------------------------------------------------------------------------------------------------------------------------------------------------|
| 121    | Coleman et al. (2012)  | 63%               | 47%                     | 20%                   | 37%                      | 16%           | 15%                    | 31%                | Yes 0 No 5<br>If modified 1 | Y         | Y               | M: Higher in post SRS vs matched no SRS, and both pre and post SRS vs. gen popn. QoL: FtM < gen popn, FtM post breast/chest surgery > not surgery, mixed results at 15 yrs.                       |
| 142    | Davies et al. (2015)   | 62%               | 38%                     | 17%                   | 61%                      | 28%           | 14%                    | 28%                | Yes 0 No 3<br>If modified 3 | N         | Y               | QoL: A voice-related TG QoL measure correlated with own and others' perception.                                                                                                                   |
| 163    | ECDC (2018)            | 94%               | 56%                     | 55%                   | 76%                      | 68%           | 38%                    | 69%                | Yes 4 No 0<br>If modified 2 | Y         | Y               | M: Reduced by early diagnosis. QoL: Cost/QALY in anti-HCV birth cohort screening is acceptable. Universal offer HIV testing in hospital settings is highly cost effective.                        |
| 184    | Gilligan et al. (2017) | 84%               | 67%                     | 66%                   | 81%                      | 47%           | 61%                    | 78%                | Yes 2 No 0<br>If modified 4 | N         | N               |                                                                                                                                                                                                   |
| 205    | Hembree et al. (2017)  | 65%               | 40%                     | 41%                   | 73%                      | 29%           | 65%                    | 56%                | Yes 1 No 2<br>If modified 3 | Y         | Y               | M: TW/TM's CV mortality same ("insufficient very low quality data" for TM) and younger age at death after SRS. QoL: long term psychological and psychiatric issues post SRS.                      |
| 226    | IAPHCCO (2015)         | 85%               | 56%                     | 61%                   | 87%                      | 40%           | 63%                    | 81%                | Yes 3 No 0<br>If modified 3 | Y         | Y               | M: Lower if early ART, easy access, immediate ART, and community distribution. QoL: ART preserves QoL, and stigma and mental health impact on QoL.                                                |
| 247    | Ralph et al. (2010)    | 45%               | 14%                     | 19%                   | 64%                      | 5%            | 32%                    | 28%                | Yes 0 No 5<br>If modified 1 | N         | N               |                                                                                                                                                                                                   |
| 268    | Strang et al. (2016)   | 57%               | 33%                     | 19%                   | 39%                      | 8%            | 25%                    | 11%                | Yes 0 No 6<br>If modified 0 | N         | N               |                                                                                                                                                                                                   |
| 289    | T'Sjoen et al. (2020)  | 59%               | 37%                     | 35%                   | 58%                      | 15%           | 33%                    | 42%                | Yes 0 No 4<br>If modified 2 | N         | Y               | QoL: Sexual life improves after GAMI, but not to cisgender levels.                                                                                                                                |
| 3010   | WHO (2011)             | 94%               | 89%                     | 87%                   | 86%                      | 64%           | 82%                    | 83%                | Yes 5 No 0<br>If modified 1 | Y         | Y               | M: Looked for mortality evidence but none found. QoL: Positive QALYs if HIV averted.                                                                                                              |
| 3111   | WHO (2012)             | 85%               | 60%                     | 81%                   | 76%                      | 41%           | 72%                    | 72%                | Yes 4 No 0<br>If modified 2 | N         | Y               | QoL: Positive QALYs modelled if PrEP.                                                                                                                                                             |
| 3312   | WHO (2016)             | 94%               | 93%                     | 81%                   | 89%                      | 84%           | 65%                    | 94%                | Yes 5 No 0<br>If modified 1 | Y         | N               | M: Lower if access and adhere to OST and at prison release, if early ART and complete TB Rx, HBV/ HCV managed; and access to post abortion care. Worse if food insecure, poor nutrition, low BMI. |

**Key:** ART, antiretroviral therapy; CV, cardiovascular; ECDC, European Centre for Disease Prevention and Control; FtM, female-to-male; gen popn, general population; GAMI, gender affirming medical intervention; HBV, hepatitis B virus; HCV, hepatitis C virus; HIV, human immuno-deficiency virus; IAPHCCO, International advisory panel on HIV care continuum optimization; M, mortality; OST, opiate substitute therapy; PrEP, pre-exposure prophylaxis; QALY, quality adjusted life year; QoL, Quality of life; Rx, treatment; SR, systematic review; SRS, sex reassignment surgery; TB, tuberculosis; TG, transgender; TM, trans man; TW, trans woman; WHO, World Health Association. Two prioritised domains for **stakeholders and research team**. Colours to aid interpretation (not thresholds) <30 **RED**, 30-70 **AMBER**, >70 **GREEN**

1  
2  
3 **International Clinical Practice Guidelines for Gender Minority/Trans People:**  
4  
5 **Systematic Review and Quality Assessment**  
6  
7  
8  
9

10 **Supplementary/ Web/ Appendices**  
11

12 W1. Search terms used and search strategy for at least one database  
13

14 W2. Stakeholder and review team priority scoring exercise  
15

16 W3. Full text excluded studies with reasons for exclusion  
17  
18  
19  
20  
21  
22  
23  
24  
25  
26  
27  
28  
29  
30  
31  
32  
33  
34  
35  
36  
37  
38  
39  
40  
41  
42  
43  
44  
45  
46  
47  
48  
49  
50  
51  
52  
53  
54  
55  
56  
57  
58  
59  
60

## W1: Literature searching – Databases searched and search terms used

### Embase <1974 to 2019 July 29>

- 1 transgender.mp. or transgender/ (7297)
- 2 transsexual.mp. (2070)
- 3 gender identity/ or gender non-conforming.mp. (15929)
- 4 non-binary.mp. (219)
- 5 gender minority.mp. or "sexual and gender minority"/ (1582)
- 6 transman.mp. (20)
- 7 transwoman.mp. (25)
- 8 gender dysphoria.mp. or gender dysphoria/ (1887)
- 9 gender diversity.mp. (257)
- 10 1 or 2 or 3 or 4 or 5 or 6 or 7 or 8 or 9 (24836)
- 11 practice guideline/ or clinical guideline.mp. (387400)
- 12 10 and 11 (511)
- 13 limit 12 to yr="2008 - 2020" (460)

### Ovid MEDLINE(R) ALL <1946 to July 29, 2019>

- 1 gender diversity.mp. (225)
- 2 gender dysphoria.mp. or Transsexualism/ or Gender Dysphoria/ or Gender Identity/ (20817)
- 3 gender minority.mp. or "Sexual and Gender Minorities"/ (2406)
- 4 Transgender Persons/ or gender non-conforming.mp. (2429)
- 5 non-binary.mp. (164)
- 6 transgender.mp. (5364)
- 7 transman.mp. (8)
- 8 transwoman.mp. (13)
- 9 Transsexualism/ or transsexual.mp. (3855)
- 10 1 or 2 or 3 or 4 or 5 or 6 or 7 or 8 or 9 (26619)
- 11 Practice Guidelines as Topic/ or clinical guideline.mp. (112006)
- 12 10 and 11 (103)

### Web of Science

Search terms: (TOPIC: (((((transgender OR gender dysphoria) OR transsexual) OR gender identity) OR transman) OR transwomen)  
AND TOPIC: (clinical guideline OR practice guideline)) [271 results]

(TOPIC: (gender incongruence) AND TOPIC: (clinical guideline OR practice guideline))

### NICE Evidence

Search terms: Transgender, gender dysphoria

**CINAHL**

(transgender or transsexual or transsexual or gender variant or gender non-conforming or transmen or transwomen or gender dysphoria or gender identity) AND (clinical guideline or practice guideline)

**PSYCInfo**

(transgender or transsexual or transsexual or gender variant or gender non-conforming or transmen or transwomen or gender dysphoria or gender identity) AND (clinical guideline or practice guideline)

**AHRQ National Guidelines Clearing House,**

Search terms: trans, gender identity. Was stopped in 2018 – no update searches available

**eGuidelines**

Search terms: trans, gender identity

**Guidelines International Network:**

Search terms: Transgender, gender dysphoria, gender identity

**WHO website** – not searchable so used Google instead

**Google Search terms:** WHO transgender guidelines - First 100 hits examined

Update: WHO transgender guidelines 2020

W2: Stakeholder prioritisation exercise and comparison with research team

| Domains                  | Stakeholders (n=19) # |          |       |       |         |               | Reviewers (n=6) |    |          |     |    |          |
|--------------------------|-----------------------|----------|-------|-------|---------|---------------|-----------------|----|----------|-----|----|----------|
|                          | 1 highest             | 2        | 3     | 4     | 5       | 6 lowest      | 1 highest       | 2  | 3        | 4   | 5  | 6 lowest |
| Scope and purpose        | ***                   | ***** *  | * **  | **    | ***** * |               | *               | *  | ***** ** | **  |    | *        |
| Stakeholder Involvement  | ***** ****            | *        | ***   | **    | **      | *             |                 |    | *        | *   | ** | *        |
| Rigour of development    | *                     | *        | ***** | ***** | ****    | **            | *****           | *  |          |     |    |          |
| Clarity and presentation | ***                   | ***      | ***** | ***   | *       | ***           |                 | *  |          | *** | *  |          |
| Applicability            | *                     | ***** ** | **    | ***** | ***     |               |                 | *  |          |     | *  | ***      |
| Editorial independence   | **                    | *        | **    | *     |         | ***** ***** * |                 | ** |          |     | ** | *        |

**Key:** # Numbers do not all add up to 19 as one stakeholder only gave first two preferences; \* stakeholder or reviewer preference vote. Green shows highest priority and red shows lowest priority

### W3: Excluded full studies with reasons for exclusion

| Full Citation (n=122)                                                                                                                                                                                                                                                                                           | Reason(s) for exclusion                                   |
|-----------------------------------------------------------------------------------------------------------------------------------------------------------------------------------------------------------------------------------------------------------------------------------------------------------------|-----------------------------------------------------------|
| Ackerley CG, Poteat T, Kelley CF. Human Immunodeficiency Virus in Transgender Persons. <i>Endocrinol Metab Clin North Am</i> 2019; <b>48</b> :453–64. doi:10.1016/j.ecl.2019.02.007                                                                                                                             | Not a CPG. Single country.                                |
| Adams N, Pearce R, Veale J, <i>et al.</i> Guidance and Ethical Considerations for Undertaking Transgender Health Research and Institutional Review Boards Adjudicating this Research. <i>Transgender Heal</i> 2017; <b>2</b> :165–75. doi:10.1089/trgh.2017.0012                                                | Not a CPG.                                                |
| ADFAM. Including diverse families: good practice guidelines. 2010. <a href="https://adfam.org.uk/files/docs/idf_toolkit.pdf">https://adfam.org.uk/files/docs/idf_toolkit.pdf</a>                                                                                                                                | No TG specific recommendation. Single country.            |
| Akl EA, Kennedy C, Konda K, <i>et al.</i> Using GRADE methodology for the development of public health guidelines for the prevention and treatment of HIV and other STIs among men who have sex with men and transgender people. <i>BMC Public Health</i> 2012; <b>12</b> :386. doi:10.1186/1471-2458-12-386    | Not a CPG.                                                |
| American College of Obstetricians and Gynecologists, Sokkary N, Gomez-Lobo V. Committee Opinion No. 685: Care for Transgender Adolescents. <i>Obstet Gynecol</i> 2017; <b>129</b> :e11–6. doi:10.1097/AOG.0000000000001861                                                                                      | Not a CPG. Single country.                                |
| American Psychological Assoc. Guidelines for psychological practice with transgender and gender nonconforming people. <i>Am Psychol</i> 2015; <b>70</b> :832–64. doi:10.1037/a0039906                                                                                                                           | Single country.                                           |
| American Psychological Association. Multicultural guidelines: An ecological approach to context, identity, and intersectionality, 2017. <i>Am Psychol Assoc</i> : 2017. <a href="http://www.apa.org/about/policy/multicultural-guidelines.pdf">http://www.apa.org/about/policy/multicultural-guidelines.pdf</a> | Single country.                                           |
| American Society for Reproductive Medicine, American College of Obstetricians and Gynecologists. Prepregnancy counseling: Committee Opinion No. 762. <i>Fertil Steril</i> 2019; <b>111</b> :32–42. doi:10.1016/j.fertnstert.2018.12.003                                                                         | Not a CPG. No TG specific recommendation. Single country. |
| Baggaley R, Armstrong A, Dodd Z, <i>et al.</i> Young key populations and HIV: A special emphasis and consideration in the new WHO Consolidated Guidelines on HIV Prevention, Diagnosis, Treatment and Care for Key Populations. <i>J Int AIDS Soc</i> 2015; <b>18</b> :85–8. doi:10.7448/IAS.18.2.19438         | Not a CPG.                                                |
| Barrett J. Gender Dysphoria in Adults. <i>BMJ Best Pract</i> . 2018. <a href="https://bestpractice.bmj.com/topics/en-gb/992">https://bestpractice.bmj.com/topics/en-gb/992</a>                                                                                                                                  | Not a CPG. Single author.                                 |
| Bekker L-G, Rebe K, Venter F, <i>et al.</i> Southern African guidelines on the safe use of pre-exposure prophylaxis in persons at risk of acquiring HIV-1 infection. <i>South Afr J HIV Med</i> 2016; <b>17</b> . doi:10.4102/sajhivmed.v17i1.455                                                               | Single country.                                           |
| Berli JU, Capitán L, Simon D, <i>et al.</i> Facial gender confirmation surgery—review of the literature and recommendations for Version 8 of the WPATH Standards of Care. <i>Int J Transgenderism</i> 2017; <b>18</b> :264–70. doi:10.1080/15532739.2017.1302862                                                | Not a CPG.                                                |
| Bhugra D, Gupta S, Schouler-Ocak M, <i>et al.</i> EPA Guidance Mental Health Care of Migrants. <i>Eur Psychiatry</i> 2014; <b>29</b> :107–15. doi:10.1016/j.eurpsy.2014.01.003                                                                                                                                  | Not a CPG. No TG specific recommendation.                 |
| Bonifacio JH, Maser C, Stadelman K, <i>et al.</i> Management of gender dysphoria in adolescents in primary care. <i>Can Med Assoc J</i> 2019; <b>191</b> :E69–75. doi:10.1503/cmaj.180672                                                                                                                       | Not a CPG. Single country.                                |
| Bonnington A, Dianat S, Kerns J, <i>et al.</i> Society of Family Planning clinical recommendations: Contraceptive counseling for transgender and gender diverse people who were female sex assigned at birth. <i>Contraception</i> Published Online First: 2020. doi:10.1016/j.contraception.2020.04.001        | Single country.                                           |
| Boroughs MS, Bedoya CA, O’Cleirigh C, <i>et al.</i> Toward Defining, Measuring, and Evaluating LGBT Cultural Competence for Psychologists. <i>Clin Psychol Sci Pract</i> 2015; <b>22</b> :151–71. doi:10.1111/cpsp.12098                                                                                        | Not a CPG. Single country.                                |

|    |                                                                                                                                                                                                                                                    |                                   |
|----|----------------------------------------------------------------------------------------------------------------------------------------------------------------------------------------------------------------------------------------------------|-----------------------------------|
| 1  |                                                                                                                                                                                                                                                    |                                   |
| 2  | Bourjeily G, Mehta S. Gender diversity in Obstetric Medicine. <i>Obstet Med</i> 2019; <b>12</b> :55–6.                                                                                                                                             | Not a CPG.                        |
| 3  | doi:10.1177/1753495X19851711                                                                                                                                                                                                                       |                                   |
| 4  | Brown B, Poteat T, Marg L, <i>et al.</i> Human Papillomavirus-Related Cancer Surveillance, Prevention, and Screening                                                                                                                               | Not a CPG.                        |
| 5  | among Transgender Men and Women: Neglected Populations at High Risk. <i>LGBT Heal</i> 2017; <b>4</b> :315–9.                                                                                                                                       |                                   |
| 6  | doi:10.1089/lgbt.2016.0142                                                                                                                                                                                                                         |                                   |
| 7  | Brown GR. Recommended revisions to the world professional association for transgender health's standards of                                                                                                                                        | Not a CPG. Single author.         |
| 8  | care section on medical care for incarcerated persons with gender identity disorder. <i>Int J Transgenderism</i>                                                                                                                                   |                                   |
| 9  | 2009; <b>11</b> :133–9. doi:10.1080/15532730903008073                                                                                                                                                                                              |                                   |
| 10 | Bruessow DM, O'Connor LM, Eaman E, <i>et al.</i> Transgender Patients: Considerations for the Family Physician.                                                                                                                                    | Not a CPG. Single country.        |
| 11 | <i>Fam Dr A J New York State Acad Fam Physicians</i> 2019; <b>7</b> :36–41.                                                                                                                                                                        |                                   |
| 12 | Burns ZT, Bitterman DS, Liu KX, <i>et al.</i> Towards a standard of care in oncology for transgender patients. <i>Lancet</i>                                                                                                                       | Not a CPG. Single country.        |
| 13 | <i>Oncol</i> 2019; <b>20</b> :331–3. doi:10.1016/S1470-2045(18)30942-2                                                                                                                                                                             |                                   |
| 14 | Byne W, Bradley SJ, Coleman E, <i>et al.</i> Treatment of gender identity disorder. <i>Am J Psychiatry</i> 2012; <b>169</b> :875–6.                                                                                                                | Not a CPG.                        |
| 15 | doi:10.1176/appi.ajp.2012.169.8.875                                                                                                                                                                                                                |                                   |
| 16 | Canady V. APA practice guidelines for females focus on their strength, resilience. <i>Ment Heal Wkly</i> 2019; <b>29</b> :1–8.                                                                                                                     | Not a CPG. Single Country. Single |
| 17 | doi:10.1002/mhw                                                                                                                                                                                                                                    | author.                           |
| 18 | Capitán L, Gutiérrez Santamaría J, Simon D, <i>et al.</i> Facial Gender Confirmation Surgery. <i>Plast Reconstr Surg</i>                                                                                                                           | Not a CPG. Single Country.        |
| 19 | 2020; <b>145</b> :818e-828e. doi:10.1097/PRS.0000000000006686                                                                                                                                                                                      |                                   |
| 20 | Carswell JM, Roberts SA. Induction and Maintenance of Amenorrhea in Transmasculine and Nonbinary                                                                                                                                                   | Not a CPG. Single country.        |
| 21 | Adolescents. <i>Transgender Heal</i> 2017; <b>2</b> :195–201. doi:10.1089/trgh.2017.0021                                                                                                                                                           |                                   |
| 22 | Chen D, Hidalgo MA, Leibowitz S, <i>et al.</i> Multidisciplinary Care for Gender-Diverse Youth: A Narrative Review and                                                                                                                             | Not a CPG.                        |
| 23 | Unique Model of Gender-Affirming Care. <i>Transgender Heal</i> 2016; <b>1</b> :117–23. doi:10.1089/trgh.2016.0009                                                                                                                                  |                                   |
| 24 | Church of England. <i>Valuing All God's Children: Challenging homophobic, biphobic and transphobic bullying.</i> 2nd                                                                                                                               | Not a CPG.                        |
| 25 | ed. Church of England Education Office 2019. <a href="https://www.churchofengland.org/sites/default/files/2019-07/Valuing&gt;All%20God's%20Children%20July%202019%200.pdf">https://www.churchofengland.org/sites/default/files/2019-07/Valuing</a> |                                   |
| 26 | <a href="https://www.churchofengland.org/sites/default/files/2019-07/Valuing&gt;All%20God's%20Children%20July%202019%200.pdf">All God's Children July 2019 0.pdf</a>                                                                               |                                   |
| 27 | Cohen J, Lo YR, Caceres CF, <i>et al.</i> WHO guidelines for HIV/STI prevention and care among MSM and                                                                                                                                             | Not a CPG.                        |
| 28 | transgender people: Implications for policy and practice. <i>Sex Transm Infect</i> 2013; <b>89</b> :536–8. doi:10.1136/sextrans-                                                                                                                   |                                   |
| 29 | 2013-051121                                                                                                                                                                                                                                        |                                   |
| 30 | Cohen-Kettenis PT, Klink D. Adolescents with gender dysphoria. <i>Best Pract Res Clin Endocrinol Metab</i>                                                                                                                                         | Not a CPG.                        |
| 31 | 2015; <b>29</b> :485–95. doi:10.1016/j.beem.2015.01.004                                                                                                                                                                                            |                                   |
| 32 | Colebunders B, De Cuypere G, Monstrey S. New Criteria for Sex Reassignment Surgery: WPATH Standards of                                                                                                                                             | Not a CPG.                        |
| 33 | Care, Version 7, Revisited. <i>Int J Transgenderism</i> 2015; <b>16</b> :222–33. doi:10.1080/15532739.2015.1081086                                                                                                                                 |                                   |
| 34 | Coxon J, Seal L. Hormone management of trans men. <i>Trends Urol Men's Heal</i> 2018; <b>9</b> :8–12. doi:10.1002/tre.651                                                                                                                          | Not a CPG. Single country.        |
| 35 | D'Angelo A, Panayotidis C, Amso N, <i>et al.</i> Recommendations for good practice in ultrasound: oocyte pick up†.                                                                                                                                 | Not a CPG. No TG specific         |
| 36 | <i>Hum Reprod Open</i> 2019; <b>2019</b> :1689–99. doi:10.1093/hropen/hoz025                                                                                                                                                                       | recommendation.                   |
| 37 | Dahl M, Feldman JL, Goldberg J, <i>et al.</i> Endocrine Therapy for Transgender Adults in British Columbia: Suggested                                                                                                                              | Single country.                   |
| 38 | Guidelines Physical Aspects of Transgender Endocrine Therapy. 2015.                                                                                                                                                                                |                                   |
| 39 | <a href="http://www.phsa.ca/transcarebc/Documents/HealthProf/BC-Trans-Adult-Endocrine-Guidelines-2015.pdf">http://www.phsa.ca/transcarebc/Documents/HealthProf/BC-Trans-Adult-Endocrine-Guidelines-2015.pdf</a>                                    |                                   |
| 40 | Davies S. The Evidence Behind the Practice: A Review of WPATH Suggested Guidelines in Transgender Voice                                                                                                                                            | Single author.                    |
| 41 | and Communication. <i>Perspect ASHA Spec Interes Groups</i> 2017; <b>2</b> :64–73. doi:10.1044/persp2.SIG10.64                                                                                                                                     |                                   |
| 42 | De Antonio IE, Gómez-Gil E. Coordination of healthcare for transsexual persons: A multidisciplinary approach.                                                                                                                                      | Not a CPG.                        |
| 43 | <i>Curr Opin Endocrinol Diabetes Obes</i> 2013; <b>20</b> :585–91. doi:10.1097/01.med.0000436182.42966.31                                                                                                                                          |                                   |
| 44 |                                                                                                                                                                                                                                                    |                                   |
| 45 |                                                                                                                                                                                                                                                    |                                   |
| 46 |                                                                                                                                                                                                                                                    |                                   |
| 47 |                                                                                                                                                                                                                                                    |                                   |

|    |                                                                                                                                                                                                                                                                                                                               |                                |
|----|-------------------------------------------------------------------------------------------------------------------------------------------------------------------------------------------------------------------------------------------------------------------------------------------------------------------------------|--------------------------------|
| 1  |                                                                                                                                                                                                                                                                                                                               |                                |
| 2  | de Haan G, Santos G-M, Arayasirikul S, <i>et al.</i> Non-Prescribed Hormone Use and Barriers to Care for Transgender                                                                                                                                                                                                          | Not a CPG.                     |
| 3  | Women in San Francisco. <i>LGBT Heal</i> 2015; <b>2</b> :313–23. doi:10.1089/lgbt.2014.0128                                                                                                                                                                                                                                   |                                |
| 4  | de Vries ALC, Cohen-Kettenis PT. Clinical management of gender dysphoria in children and adolescents: The                                                                                                                                                                                                                     | Not a CPG.                     |
| 5  | Dutch approach. <i>J Homosex</i> 2012; <b>59</b> :301–20. doi:10.1080/00918369.2012.653300                                                                                                                                                                                                                                    |                                |
| 6  | Dèttore D, Ristori J, Antonelli P, <i>et al.</i> Gender dysphoria in adolescents: The need for a shared assessment                                                                                                                                                                                                            | Not a CPG.                     |
| 7  | protocol and proposal of the AGIR protocol. <i>J Psychopathol</i> 2015; <b>21</b> :152–8.                                                                                                                                                                                                                                     |                                |
| 8  | Deutsch MB, Green J, Keatley JA, <i>et al.</i> Electronic medical records and the transgender patient:                                                                                                                                                                                                                        | Not a CPG. Single country.     |
| 9  | Recommendations from the world professional association for Transgender Health EMR working group. <i>J Am</i>                                                                                                                                                                                                                 |                                |
| 10 | <i>Med Informatics Assoc</i> 2013; <b>20</b> :700–3. doi:10.1136/amiajnl-2012-001472                                                                                                                                                                                                                                          |                                |
| 11 | Devon Partnership NHS Trust. PG12 Pharmacological Treatment of Gender Dysphoria.                                                                                                                                                                                                                                              | Single country.                |
| 12 | 2015. <a href="https://www.gires.org.uk/wp-content/uploads/2014/08/PG12-GenderDysphoria.pdf">https://www.gires.org.uk/wp-content/uploads/2014/08/PG12-GenderDysphoria.pdf</a>                                                                                                                                                 |                                |
| 13 | Etienne Tollinche L, Burrows Walters C, Radix A, <i>et al.</i> The perioperative care of the transgender patient. <i>Anesth</i>                                                                                                                                                                                               | Not a CPG. Single country.     |
| 14 | <i>Analg</i> 2018; <b>127</b> :359–66. doi:10.1213/ANE.0000000000003371                                                                                                                                                                                                                                                       |                                |
| 15 | European Society of Human Genetics. Genetic testing in asymptomatic minors: Recommendations of the                                                                                                                                                                                                                            | No TG specific recommendation. |
| 16 | European Society of Human Genetics. <i>Eur J Hum Genet</i> 2009; <b>17</b> :720–1. doi:10.1038/ejhg.2009.26                                                                                                                                                                                                                   | Single author.                 |
| 17 | Finlayson C, Johnson EK, Chen D, <i>et al.</i> Proceedings of the Working Group Session on Fertility Preservation for                                                                                                                                                                                                         | Not a CPG.                     |
| 18 | Individuals with Gender and Sex Diversity. <i>Transgender Heal</i> 2016; <b>1</b> :99–107. doi:10.1089/trgh.2016.0008                                                                                                                                                                                                         |                                |
| 19 | Fisher CB, Fried AL, Desmond M, <i>et al.</i> Perceived barriers to HIV prevention services for transgender youth.                                                                                                                                                                                                            | Not a CPG.                     |
| 20 | <i>LGBT Heal</i> 2018; <b>5</b> :350–8. doi:10.1089/lgbt.2017.0098                                                                                                                                                                                                                                                            |                                |
| 21 | Francis C, Grober E, Potter E, <i>et al.</i> A Simple Guide for Simple Orchiectomy in Transition-Related Surgeries. <i>Sex</i>                                                                                                                                                                                                | Not a CPG. Single country.     |
| 22 | <i>Med Rev</i> 2020:3–7. doi:10.1016/j.sxmr.2019.11.004                                                                                                                                                                                                                                                                       |                                |
| 23 | Fraser L. Psychotherapy in the world professional association for transgender health's standards of care:                                                                                                                                                                                                                     | Not a CPG. Single author.      |
| 24 | Background and recommendations. <i>Int J Transgenderism</i> 2009; <b>11</b> :110–26. doi:10.1080/15532730903008057                                                                                                                                                                                                            |                                |
| 25 | Gamble RM, Taylor SS, Huggins AD, <i>et al.</i> Trans-specific Geriatric Health Assessment (TGHA): An inclusive                                                                                                                                                                                                               | Not a CPG. Single country.     |
| 26 | clinical guideline for the geriatric transgender patient in a primary care setting. <i>Maturitas</i> 2020; <b>132</b> :70–5.                                                                                                                                                                                                  |                                |
| 27 | doi:10.1016/j.maturitas.2019.12.005                                                                                                                                                                                                                                                                                           |                                |
| 28 | GIRES. Guidance for GPs , other clinicians and health professionals on the care of gender variant people                                                                                                                                                                                                                      | Single country.                |
| 29 | Transgender wellbeing and healthcare. UK Dep. Heal. 2008. <a href="https://midessexccg.nhs.uk/medicines-optimisation/clinical-pathways-and-medication-guidelines/chapter-6-endocrine-system-2/1142-guidance-for-gps-and-hormone-treatment-for-gender-dysphoria-1/file">https://midessexccg.nhs.uk/medicines-</a>              |                                |
| 30 | <a href="https://midessexccg.nhs.uk/medicines-optimisation/clinical-pathways-and-medication-guidelines/chapter-6-endocrine-system-2/1142-guidance-for-gps-and-hormone-treatment-for-gender-dysphoria-1/file">optimisation/clinical-pathways-and-medication-guidelines/chapter-6-endocrine-system-2/1142-guidance-for-gps-</a> |                                |
| 31 | <a href="https://midessexccg.nhs.uk/medicines-optimisation/clinical-pathways-and-medication-guidelines/chapter-6-endocrine-system-2/1142-guidance-for-gps-and-hormone-treatment-for-gender-dysphoria-1/file">and-hormone-treatment-for-gender-dysphoria-1/file</a>                                                            |                                |
| 32 | Goeckenjan M, Glaß K, Torka S, <i>et al.</i> Indications for fertility preservation. <i>Gynakologische Endokrinol</i> 2019; <b>7</b> :71–                                                                                                                                                                                     | Not a CPG. Single country.     |
| 33 | 7. doi:10.1007/s10304-019-0241-3                                                                                                                                                                                                                                                                                              |                                |
| 34 | Griffith C, Akers W, Dispenza F, <i>et al.</i> Standards of Care for Research with Participants Who Identify as LGBTQ+.                                                                                                                                                                                                       | Not a CPG. Single country      |
| 35 | <i>J LGBT Issues Couns</i> 2017; <b>11</b> :212–29. doi:10.1080/15538605.2017.1380549                                                                                                                                                                                                                                         |                                |
| 36 | Guidance on Gender Dysphoria for Nurses. <i>Nurs Stand</i> 2013; <b>28</b> :10. doi:10.7748/ns2013.10.28.9.10.s10                                                                                                                                                                                                             | Not a CPG.                     |
| 37 | Hagen DB, Galupo MP. Trans* Individuals' Experiences of Gendered Language with Health Care Providers:                                                                                                                                                                                                                         | Not a CPG.                     |
| 38 | Recommendations for Practitioners. <i>Int J Transgenderism</i> 2014; <b>15</b> :16–34. doi:10.1080/15532739.2014.890560                                                                                                                                                                                                       |                                |
| 39 | Hamidi O, Davidge-Pitts CJ. Transfeminine Hormone Therapy. <i>Endocrinol Metab Clin North Am</i> 2019; <b>48</b> :341–55.                                                                                                                                                                                                     | Not a CPG. Single country.     |
| 40 | doi:10.1016/j.ecl.2019.02.001                                                                                                                                                                                                                                                                                                 |                                |
| 41 | Health Policy Project, Asia Pacific Transgender Network, United Nations Development Programme. <i>Blueprint for</i>                                                                                                                                                                                                           | Not a CPG.                     |
| 42 | <i>the provision of comprehensive care for trans people and trans communities in Asia and the Pacific.</i> Washington,                                                                                                                                                                                                        |                                |
| 43 | DC: Futures Group, Health Policy Project 2015. <a href="http://www.asia-">http://www.asia-</a>                                                                                                                                                                                                                                |                                |
| 44 |                                                                                                                                                                                                                                                                                                                               |                                |
| 45 |                                                                                                                                                                                                                                                                                                                               |                                |
| 46 |                                                                                                                                                                                                                                                                                                                               |                                |
| 47 |                                                                                                                                                                                                                                                                                                                               |                                |



|    |                                                                                                                                                                                                                                                                                                                                                                                                                                                                                                                                                                                                                                                                            |                                                   |
|----|----------------------------------------------------------------------------------------------------------------------------------------------------------------------------------------------------------------------------------------------------------------------------------------------------------------------------------------------------------------------------------------------------------------------------------------------------------------------------------------------------------------------------------------------------------------------------------------------------------------------------------------------------------------------------|---------------------------------------------------|
| 1  |                                                                                                                                                                                                                                                                                                                                                                                                                                                                                                                                                                                                                                                                            |                                                   |
| 2  | <a href="http://pacific.undp.org/content/rbap/en/home/library/democratic_governance/hiv_aids/blueprint-for-the-provision-of-comprehensive-care-for-trans-peop/">pacific.undp.org/content/rbap/en/home/library/democratic_governance/hiv_aids/blueprint-for-the-provision-of-comprehensive-care-for-trans-peop/</a>                                                                                                                                                                                                                                                                                                                                                         |                                                   |
| 3  |                                                                                                                                                                                                                                                                                                                                                                                                                                                                                                                                                                                                                                                                            |                                                   |
| 4  | Heidari S, Babor TF, De Castro P, <i>et al.</i> Sex and Gender Equity in Research: rationale for the SAGER guidelines and recommended use. <i>Res Integr Peer Rev</i> 2016; <b>1</b> :1–9. doi:10.1186/s41073-016-0007-6                                                                                                                                                                                                                                                                                                                                                                                                                                                   | Not a CPG.                                        |
| 5  |                                                                                                                                                                                                                                                                                                                                                                                                                                                                                                                                                                                                                                                                            |                                                   |
| 6  | Hembree W, Cohen-Kettenis P, Gooren L, <i>et al.</i> Endocrine treatment of gender-dysphoric/ gender-incongruent persons: an endocrine society clinical practice guideline. <i>Endocr Pract</i> 2017; <b>23</b> :1437–71.                                                                                                                                                                                                                                                                                                                                                                                                                                                  | Reprint of included paper (fully cited).          |
| 7  |                                                                                                                                                                                                                                                                                                                                                                                                                                                                                                                                                                                                                                                                            |                                                   |
| 8  | Hirsch S, Pickering J, Adler R. Meeting the Needs of Trans and Gender Diverse Youth: The Varied, Ubiquitous Role of the Speech-Language Pathologist in Voice and Communication Therapy/Training. <i>Perspect ASHA Spec Interes Groups</i> 2019; <b>4</b> :111–7. doi:10.1044/2018_PERS-SIG3-2018-0016                                                                                                                                                                                                                                                                                                                                                                      | Not a CPG. Single country.                        |
| 9  |                                                                                                                                                                                                                                                                                                                                                                                                                                                                                                                                                                                                                                                                            |                                                   |
| 10 | House H, Gaines S, Hawkins LA. Sexual and Gender Minority Adolescents: Meeting the Needs of Our LGBTQ Patients and Their Families. <i>Clin Pediatr Emerg Med</i> 2019; <b>20</b> :9–16. doi:10.1016/j.cpem.2019.02.004                                                                                                                                                                                                                                                                                                                                                                                                                                                     | Not a CPG. Single country.                        |
| 11 |                                                                                                                                                                                                                                                                                                                                                                                                                                                                                                                                                                                                                                                                            |                                                   |
| 12 | Hughes LD, Berzin OKG, Leung M, <i>et al.</i> Adapting Healthcare Quality Measures to Transgender Individuals. <i>LGBT Heal</i> 2017; <b>4</b> :248–51. doi:10.1089/lgbt.2017.0009                                                                                                                                                                                                                                                                                                                                                                                                                                                                                         | Not a CPG. Single country.                        |
| 13 |                                                                                                                                                                                                                                                                                                                                                                                                                                                                                                                                                                                                                                                                            |                                                   |
| 14 | Human Rights Campaign, American Academy of Pediatrics, American College of Osteopathic Pediatricians. Supporting & Caring for Transgender Children. 2016. <a href="http://hrc.im/supportingtranschildren">http://hrc.im/supportingtranschildren</a>                                                                                                                                                                                                                                                                                                                                                                                                                        | Not a CPG. Single country.                        |
| 15 |                                                                                                                                                                                                                                                                                                                                                                                                                                                                                                                                                                                                                                                                            |                                                   |
| 16 | IAPAC. IAPAC Protocols for the Integrated Management of HIV and Noncommunicable Diseases. <i>Int Assoc Provid AIDS care</i> Published Online First: 2018. <a href="https://www.iapac.org/files/2018/07/IAPAC-Protocols-for-the-Integrated-Management-of-HIV-and-Noncommunicable-Diseases_3.pdf">https://www.iapac.org/files/2018/07/IAPAC-Protocols-for-the-Integrated-Management-of-HIV-and-Noncommunicable-Diseases_3.pdf</a>                                                                                                                                                                                                                                            | No TG specific recommendation.                    |
| 17 |                                                                                                                                                                                                                                                                                                                                                                                                                                                                                                                                                                                                                                                                            |                                                   |
| 18 | IMAP. IMAP Statement on hormone therapy for transgender people. Published Online First: 2015. <a href="https://www.ippf.org/sites/default/files/ippf_imap_transgender.pdf">https://www.ippf.org/sites/default/files/ippf_imap_transgender.pdf</a>                                                                                                                                                                                                                                                                                                                                                                                                                          | Not a CPG.                                        |
| 19 |                                                                                                                                                                                                                                                                                                                                                                                                                                                                                                                                                                                                                                                                            |                                                   |
| 20 | In Case You Haven't Heard. <i>Mental Health Weekly</i> 2015; <b>25</b> :8-8. doi:10.1002/mhw.30307                                                                                                                                                                                                                                                                                                                                                                                                                                                                                                                                                                         | Not a CPG.                                        |
| 21 |                                                                                                                                                                                                                                                                                                                                                                                                                                                                                                                                                                                                                                                                            |                                                   |
| 22 | International Association for the Study of Pain. <i>Guide to Pain Management in Low-Resource Settings</i> . Seattle: : IASP 2010. <a href="https://ebooks.iasp-pain.org/guide_to_pain_management_in_low_resource_settings">https://ebooks.iasp-pain.org/guide_to_pain_management_in_low_resource_settings</a>                                                                                                                                                                                                                                                                                                                                                              | Not a CPG. No TG specific recommendation.         |
| 23 |                                                                                                                                                                                                                                                                                                                                                                                                                                                                                                                                                                                                                                                                            |                                                   |
| 24 | International Association of Physicians in AIDS Care. IAPAC – Blueprint to Address the Sexual and Reproductive Health Care and STI/HIV Prevention Needs of Adolescent Girls and Young Women. Published Online First: 2011. <a href="https://www.iapac.org/guidance/recommendations/blueprint-to-address-the-sexual-and-reproductive-health-care-and-sti-hiv-prevention-needs-of-adolescent-girls-and-young-women-in-latin-america-and-the-caribbean/">https://www.iapac.org/guidance/recommendations/blueprint-to-address-the-sexual-and-reproductive-health-care-and-sti-hiv-prevention-needs-of-adolescent-girls-and-young-women-in-latin-america-and-the-caribbean/</a> | No TG specific recommendation.                    |
| 25 |                                                                                                                                                                                                                                                                                                                                                                                                                                                                                                                                                                                                                                                                            |                                                   |
| 26 | International Association of Providers in AIDS Care. Recommendations for the rapid expansion of HIV self-testing in Fast-Track Cities. Published Online First: 2017. <a href="http://www.iapac.org/uploads/IAPAC-ASLM-HIVST-FTC-Recommendations-012617.pdf">http://www.iapac.org/uploads/IAPAC-ASLM-HIVST-FTC-Recommendations-012617.pdf</a>                                                                                                                                                                                                                                                                                                                               | No TG specific recommendation.                    |
| 27 |                                                                                                                                                                                                                                                                                                                                                                                                                                                                                                                                                                                                                                                                            |                                                   |
| 28 | International Planned Parenthood Federation. IPPF. Hormonal contraception: recommendations for women at high risk of HIV. Published Online First: 2017. <a href="http://www.ippf.org/sites/default/files/2017-07/ippf_technical_brief_HC_HIV_June2017.pdf">http://www.ippf.org/sites/default/files/2017-07/ippf_technical_brief_HC_HIV_June2017.pdf</a>                                                                                                                                                                                                                                                                                                                    | Not a CPG. No TG specific recommendation.         |
| 29 |                                                                                                                                                                                                                                                                                                                                                                                                                                                                                                                                                                                                                                                                            |                                                   |
| 30 | International Planned Parenthood Federation. Putting sexuality back into Comprehensive Sexuality Education: making the case for a rights-based, sex-positive approach. Published Online First: 2016. <a href="https://www.ippf.org/sites/default/files/2016-10/Putting_Sexuality_back_into_Comprehensive_Sexuality_Education_0.pdf">https://www.ippf.org/sites/default/files/2016-10/Putting_Sexuality_back_into_Comprehensive_Sexuality_Education_0.pdf</a>                                                                                                                                                                                                               | Not a CPG. No TG specific recommendation.         |
| 31 |                                                                                                                                                                                                                                                                                                                                                                                                                                                                                                                                                                                                                                                                            |                                                   |
| 32 | Jungwirth, A; Diemer, T; Kopa, Z; Krausz, C; Minhas, S; Tournaye H. <i>EAU Guidelines on Male Infertility</i> . European Association of Urology 2018.                                                                                                                                                                                                                                                                                                                                                                                                                                                                                                                      | Superseded by 2020 CPG with no TG recommendations |
| 33 |                                                                                                                                                                                                                                                                                                                                                                                                                                                                                                                                                                                                                                                                            |                                                   |
| 34 | Kaltiala-Heino R, Bergman H, Työläjärvi M, <i>et al.</i> Gender dysphoria in adolescence: current perspectives. <i>Adolesc Health Med Ther</i> 2018; <b>9</b> :31–41. doi:10.2147/AHMT.S135432                                                                                                                                                                                                                                                                                                                                                                                                                                                                             | Not a CPG.                                        |
| 35 |                                                                                                                                                                                                                                                                                                                                                                                                                                                                                                                                                                                                                                                                            |                                                   |
| 36 | Karasic DH, Fraser L. Multidisciplinary Care and the Standards of Care for Transgender and Gender                                                                                                                                                                                                                                                                                                                                                                                                                                                                                                                                                                          | Derivative, not de novo.                          |
| 37 |                                                                                                                                                                                                                                                                                                                                                                                                                                                                                                                                                                                                                                                                            |                                                   |
| 38 |                                                                                                                                                                                                                                                                                                                                                                                                                                                                                                                                                                                                                                                                            |                                                   |
| 39 |                                                                                                                                                                                                                                                                                                                                                                                                                                                                                                                                                                                                                                                                            |                                                   |
| 40 |                                                                                                                                                                                                                                                                                                                                                                                                                                                                                                                                                                                                                                                                            |                                                   |
| 41 |                                                                                                                                                                                                                                                                                                                                                                                                                                                                                                                                                                                                                                                                            |                                                   |
| 42 |                                                                                                                                                                                                                                                                                                                                                                                                                                                                                                                                                                                                                                                                            |                                                   |
| 43 |                                                                                                                                                                                                                                                                                                                                                                                                                                                                                                                                                                                                                                                                            |                                                   |
| 44 |                                                                                                                                                                                                                                                                                                                                                                                                                                                                                                                                                                                                                                                                            |                                                   |
| 45 |                                                                                                                                                                                                                                                                                                                                                                                                                                                                                                                                                                                                                                                                            |                                                   |
| 46 |                                                                                                                                                                                                                                                                                                                                                                                                                                                                                                                                                                                                                                                                            |                                                   |
| 47 |                                                                                                                                                                                                                                                                                                                                                                                                                                                                                                                                                                                                                                                                            |                                                   |

|    |                                                                                                                                                                                                               |                                     |
|----|---------------------------------------------------------------------------------------------------------------------------------------------------------------------------------------------------------------|-------------------------------------|
| 1  |                                                                                                                                                                                                               |                                     |
| 2  | Nonconforming Individuals. <i>Clin Plast Surg</i> 2018; <b>45</b> :295–9. doi:10.1016/j.cps.2018.03.016                                                                                                       |                                     |
| 3  | Kemp K, Dibley L, Chauhan U, <i>et al.</i> Second N-ECCO Consensus Statements on the European Nursing Roles in                                                                                                | No TG specific recommendation.      |
| 4  | Caring for Patients with Crohn's Disease or Ulcerative Colitis. <i>J Crohn's Colitis</i> 2018; <b>12</b> :760–76.                                                                                             |                                     |
| 5  | doi:10.1093/ecco-jcc/jjy020                                                                                                                                                                                   |                                     |
| 6  | Khosla S, Davidge-Pitts C. Skeletal considerations in the medical treatment of transgender people. <i>Lancet</i>                                                                                              | Not a CPG.                          |
| 7  | <i>Diabetes Endocrinol</i> 2019; <b>7</b> :893–5. doi:10.1016/S2213-8587(19)30353-5                                                                                                                           |                                     |
| 8  | Klein DA, Malcolm NM, Berry-Bibee EN, <i>et al.</i> Quality Primary Care and Family Planning Services for LGBT                                                                                                | Not a CPG. No TG specific           |
| 9  | Clients: A Comprehensive Review of Clinical Guidelines. <i>LGBT Health</i> . 2018; <b>5</b> :153-170.                                                                                                         | recommendation. Derivative, not de  |
| 10 | Doi:10.1089/lgbt.2017.0213                                                                                                                                                                                    | novo. Single country.               |
| 11 | Klein M, Sathasivam A, Novoa Y, <i>et al.</i> Recent Consensus Statements in Pediatric Endocrinology: A Selective                                                                                             | Not CPG. Derivative not de novo. No |
| 12 | Review. <i>Pediatr Clin North Am</i> 2011; <b>58</b> :1301–15. doi:10.1016/j.pcl.2011.07.014                                                                                                                  | TG specific recommendation.         |
| 13 | LGBT Health Program. <i>Guidelines and Protocols for Hormone Therapy and Primary Health Care for Trans</i>                                                                                                    | Single country. Single author.      |
| 14 | <i>Clients</i> . Toronto: Sherbourne Health Centre 2015. <a href="http://sherbourne.on.ca/lgbt-health/guidelines-protocols-for-trans-care/">http://sherbourne.on.ca/lgbt-health/guidelines-protocols-for-</a> |                                     |
| 15 | <a href="http://sherbourne.on.ca/lgbt-health/guidelines-protocols-for-trans-care/">trans-care/</a>                                                                                                            |                                     |
| 16 | MacDonald S, Smith S. Dermatologists guide to cultural competency and the LGBTIQ patient. <i>Australas J</i>                                                                                                  | Not a CPG.                          |
| 17 | <i>Dermatol</i> 2018; <b>59</b> :85.                                                                                                                                                                          |                                     |
| 18 | Martinez C, Rikhi R, Haque T, <i>et al.</i> Gender Identity, Hormone Therapy, and Cardiovascular Disease Risk. <i>Curr</i>                                                                                    | Not a CPG.                          |
| 19 | <i>Probl Cardiol</i> 2020; <b>45</b> . doi:10.1016/j.cpcardiol.2018.09.003                                                                                                                                    |                                     |
| 20 | Meyenburg B, Korte A, Moller B, <i>et al.</i> Gender identity disorders in childhood and adolescence (F64) / Storungen                                                                                        | Not a CPG.                          |
| 21 | der Geschlechtsidentitat im Kindes- und Jugendalter (F64). <i>Prax Kinderpsychol Kinderpsychiatr</i> 2014; <b>63</b> :542–52.                                                                                 |                                     |
| 22 | Moreno-Pérez Ó, Esteva De Antonio I. Clinical practice guidelines for assessment and treatment of                                                                                                             | Single country. Derivative, not de  |
| 23 | transsexualism. SEEN Identity and Sexual Differentiation Group (GIDSEEN). <i>Endocrinol y Nutr (English Ed</i>                                                                                                | novo.                               |
| 24 | 2012; <b>59</b> :367–82. doi:10.1016/j.endoen.2012.07.004                                                                                                                                                     |                                     |
| 25 | NHS England. Interim Gender Dysphoria Protocol and Service Guideline 2013/14. Published Online First:                                                                                                         | Not a CPG. Single country.          |
| 26 | 2013. <a href="https://www.gendergp.com/wp-content/uploads/2016/03/NHS-Gender-Protocol.pdf">https://www.gendergp.com/wp-content/uploads/2016/03/NHS-Gender-Protocol.pdf</a>                                   |                                     |
| 27 | Oliphant J, Veale J, Macdonald J, <i>et al.</i> Guidelines for Gender Affirming Healthcare for Gender Diverse and                                                                                             | Single country.                     |
| 28 | Transgender Children, Young People and Adults in Aotearoa, New Zealand. <i>N Z Med J</i> 2018; <b>131</b> :86–                                                                                                |                                     |
| 29 | 96. <a href="http://www.ncbi.nlm.nih.gov/pubmed/30543615">http://www.ncbi.nlm.nih.gov/pubmed/30543615</a>                                                                                                     |                                     |
| 30 | Olson J, Schragger SM, Clark LF, <i>et al.</i> Subcutaneous Testosterone: An Effective Delivery Mechanism for                                                                                                 | Not a CPG.                          |
| 31 | Masculinizing Young Transgender Men. <i>LGBT Heal</i> 2014; <b>1</b> :165–7. doi:10.1089/lgbt.2014.0018                                                                                                       |                                     |
| 32 | Pan American Health Organization [PAHO], John Snow Inc., World Professional Association for Transgender                                                                                                       | Not a CPG.                          |
| 33 | Health, <i>et al.</i> <i>Blueprint for the Provision of Comprehensive Care for Trans Persons and Their Communities in the</i>                                                                                 |                                     |
| 34 | <i>Caribbean and Other Anglophone Countries</i> . Arlington VA: John Snow Inc 2014.                                                                                                                           |                                     |
| 35 | <a href="https://www.paho.org/hq/dmdocuments/2014/2014-cha-blueprint-comprehensive-anglo-countries.pdf">https://www.paho.org/hq/dmdocuments/2014/2014-cha-blueprint-comprehensive-anglo-countries.pdf</a>     |                                     |
| 36 | Pan American Health Organization. <i>Blueprint for the Provision of Comprehensive Care to Gay Men and Other</i>                                                                                               | No TG specific recommendation.      |
| 37 | <i>Men Who Have Sex with Men (MSM) in Latin America and the Caribbean</i> . Washington, D.C.: 2010                                                                                                            |                                     |
| 38 | Patel JM, Dolitsky S, Bachman GA, <i>et al.</i> Gynecologic cancer screening in the transgender male population and                                                                                           | Not a CPG. Single country.          |
| 39 | its current challenges. <i>Maturitas</i> 2019; <b>129</b> :40–4. doi:10.1016/j.maturitas.2019.08.009                                                                                                          |                                     |
| 40 | Phillips JC, Patsdaughter CA. Toward a Healthier Tomorrow: Competent Health and HIV Care for Transgender                                                                                                      | Not a CPG.                          |
| 41 | Persons. <i>J Assoc Nurses AIDS Care</i> 2010; <b>21</b> :183–5. doi:10.1016/j.jana.2010.02.009                                                                                                               |                                     |
| 42 | Potter J, Peitzmeier SM, Bernstein I, <i>et al.</i> Cervical Cancer Screening for Patients on the Female-to-Male                                                                                              | Not a CPG.                          |
| 43 | Spectrum: a Narrative Review and Guide for Clinicians. <i>J Gen Intern Med</i> 2015; <b>30</b> :1857–64. doi:10.1007/s11606-                                                                                  |                                     |

|    |                                                                                                                                                                                                                                                                                                             |                                |
|----|-------------------------------------------------------------------------------------------------------------------------------------------------------------------------------------------------------------------------------------------------------------------------------------------------------------|--------------------------------|
| 1  |                                                                                                                                                                                                                                                                                                             |                                |
| 2  | 015-3462-8                                                                                                                                                                                                                                                                                                  |                                |
| 3  | Pratt-Chapman M, Potter J. Cancer Care Considerations for Sexual and Gender Minority Patients. <i>Oncol Issues</i>                                                                                                                                                                                          | Not a CPG. Single country.     |
| 4  | 2019; <b>34</b> :26–36. <a href="https://www.accc-cancer.org/docs/documents/oncology-issues/articles/nd19/nd19-cancer-care-considerations-for-sexual-and-gender-minority-patients.pdf?sfvrsn=d116445f_2">https://www.accc-cancer.org/docs/documents/oncology-issues/articles/nd19/nd19-cancer-care-</a>     |                                |
| 5  | <a href="https://www.accc-cancer.org/docs/documents/oncology-issues/articles/nd19/nd19-cancer-care-considerations-for-sexual-and-gender-minority-patients.pdf?sfvrsn=d116445f_2">considerations-for-sexual-and-gender-minority-patients.pdf?sfvrsn=d116445f_2</a>                                           |                                |
| 6  | Psychological Society of South Africa. <i>Practice Guidelines For Psychology Professionals Working With Sexually</i>                                                                                                                                                                                        | Single country.                |
| 7  | <i>And Gender-Diverse People</i> . Johannesburg: Psychological Society of South Africa 2017.                                                                                                                                                                                                                |                                |
| 8  | <a href="https://www.psyssa.com/wp-content/uploads/2018/04/PsySSA-Diversity-Competence-Practice-Guidelines-PRINT-singlesided.pdf">https://www.psyssa.com/wp-content/uploads/2018/04/PsySSA-Diversity-Competence-Practice-Guidelines-PRINT-</a>                                                              |                                |
| 9  | <a href="https://www.psyssa.com/wp-content/uploads/2018/04/PsySSA-Diversity-Competence-Practice-Guidelines-PRINT-singlesided.pdf">singlesided.pdf</a>                                                                                                                                                       |                                |
| 10 | Radix A, Sevelius J, Deutsch MB. Transgender women, hormonal therapy and HIV treatment: A comprehensive                                                                                                                                                                                                     | Not a CPG.                     |
| 11 | review of the literature and recommendations for best practices. <i>J Int AIDS Soc</i> 2016; <b>19</b> :1–8.                                                                                                                                                                                                |                                |
| 12 | doi:10.7448/IAS.19.3.20810                                                                                                                                                                                                                                                                                  |                                |
| 13 | Reilly M, Desousa V, Garza-Flores A, <i>et al</i> . Young Children With Gender Nonconforming Behaviors and                                                                                                                                                                                                  | Not a CPG. Single country.     |
| 14 | Preferences. <i>J Dev Behav Pediatr</i> 2019; <b>40</b> :60–71. doi:10.1097/DBP.0000000000000612                                                                                                                                                                                                            |                                |
| 15 | Reisner SL, Pardo ST, Gamarel KE, <i>et al</i> . Substance use to cope with stigma in healthcare among U.S. female-                                                                                                                                                                                         | Not a CPG.                     |
| 16 | to-male trans masculine adults. <i>LGBT Heal</i> 2015; <b>2</b> :324–32. doi:10.1089/lgbt.2015.0001                                                                                                                                                                                                         |                                |
| 17 | Safer JD, Tangpricha V. Care of Transgender persons. <i>N Engl J Med</i> 2019; <b>381</b> :2451–60.                                                                                                                                                                                                         | Not a CPG. Single country.     |
| 18 | doi:10.1056/NEJMcp1903650                                                                                                                                                                                                                                                                                   |                                |
| 19 | Salas-Humara C, Sequeira GM, Rossi W, <i>et al</i> . Gender affirming medical care of transgender youth. <i>Curr Probl</i>                                                                                                                                                                                  | Not a CPG. Single country.     |
| 20 | <i>Pediatr Adolesc Health Care</i> 2019; <b>49</b> :1–21. doi:10.1016/j.cppeds.2019.100683                                                                                                                                                                                                                  |                                |
| 21 | Schechter LS, D'Arpa S, Cohen MN, <i>et al</i> . Gender Confirmation Surgery: Guiding Principles. <i>J Sex Med</i>                                                                                                                                                                                          | Not a CPG.                     |
| 22 | 2017; <b>14</b> :852–6. doi:10.1016/j.jsxm.2017.04.001                                                                                                                                                                                                                                                      |                                |
| 23 | Selvaggi G, Dhejne C, Landen M, <i>et al</i> . The 2011 WPATH standards of care and penile reconstruction in female-                                                                                                                                                                                        | Not a CPG.                     |
| 24 | to-male transsexual individuals. <i>Adv Urol</i> 2012; <b>2012</b> . doi:10.1155/2012/581712                                                                                                                                                                                                                |                                |
| 25 | Shpherd JC, Kauth MR, Firek AF, <i>et al</i> . Interdisciplinary Transgender Veteran Care: Development of a Core                                                                                                                                                                                            | Not a CPG.                     |
| 26 | Curriculum for VHA Providers. <i>Transgender Heal</i> 2016; <b>1</b> :54–62. doi:10.1089/trgh.2015.0004                                                                                                                                                                                                     |                                |
| 27 | Shumer DE, Reisner SL, Edwards-Leeper L, <i>et al</i> . Evaluation of Asperger Syndrome in Youth Presenting to a                                                                                                                                                                                            | Not a CPG.                     |
| 28 | Gender Dysphoria Clinic. <i>LGBT Heal</i> 2016; <b>3</b> :387–90. doi:10.1089/lgbt.2015.0070                                                                                                                                                                                                                |                                |
| 29 | Speiser PW, Arlt W, Auchus RJ, <i>et al</i> . Congenital Adrenal Hyperplasia Due to Steroid 21-Hydroxylase Deficiency:                                                                                                                                                                                      | No TG specific recommendation. |
| 30 | An Endocrine Society* Clinical Practice Guideline. <i>J Clin Endocrinol Metab</i> 2018; <b>103</b> :4043–88.                                                                                                                                                                                                |                                |
| 31 | doi:10.1210/jc.2018-01865                                                                                                                                                                                                                                                                                   |                                |
| 32 | Staples JM, Bird ER, Masters TN, <i>et al</i> . Considerations for Culturally Sensitive Research With Transgender                                                                                                                                                                                           | Not a CPG. Single country.     |
| 33 | Adults: A Qualitative Analysis. <i>J Sex Res</i> 2018; <b>55</b> :1065–76. doi:10.1080/00224499.2017.1292419                                                                                                                                                                                                |                                |
| 34 | Subramanyam A, Mukherjee A, Dave M, <i>et al</i> . Clinical practice guidelines for autism spectrum disorders. <i>Indian J</i>                                                                                                                                                                              | Single country.                |
| 35 | <i>Psychiatry</i> 2019; <b>61</b> :254. doi:10.4103/psychiatry.IndianJPsychiatry_542_18                                                                                                                                                                                                                     |                                |
| 36 | Telfer MM, Tollit MA, Pace CC, <i>et al</i> . <i>Australian Standards of Care and Treatment Guidelines for Trans and</i>                                                                                                                                                                                    | Single country.                |
| 37 | <i>Gender Diverse Children and Adolescents Version 1.1</i> . Melbourne: The Royal Children's Hospital 2018.                                                                                                                                                                                                 |                                |
| 38 | <a href="https://www.rch.org.au/uploadedFiles/Main/Content/adolescent-medicine/australian-standards-of-care-and-treatment-guidelines-for-trans-and-gender-diverse-children-and-adolescents.pdf">https://www.rch.org.au/uploadedFiles/Main/Content/adolescent-medicine/australian-standards-of-care-and-</a> |                                |
| 39 | <a href="https://www.rch.org.au/uploadedFiles/Main/Content/adolescent-medicine/australian-standards-of-care-and-treatment-guidelines-for-trans-and-gender-diverse-children-and-adolescents.pdf">treatment-guidelines-for-trans-and-gender-diverse-children-and-adolescents.pdf</a>                          |                                |
| 40 | The Lancet. New guidelines on transgender health. <i>Lancet</i> 2013; <b>382</b> :1460. doi:10.1016/S0140-6736(13)62277-1                                                                                                                                                                                   | Not a CPG.                     |
| 41 | Thibaut F, Bradford JMW, Briken P, <i>et al</i> . The World Federation of Societies of Biological Psychiatry (WFSBP)                                                                                                                                                                                        | No TG specific recommendation. |
| 42 | guidelines for the treatment of adolescent sexual offenders with paraphilic disorders. <i>World J Biol Psychiatry</i>                                                                                                                                                                                       |                                |
| 43 | 2016; <b>17</b> :2–38. doi:10.3109/15622975.2015.1085598                                                                                                                                                                                                                                                    |                                |
| 44 |                                                                                                                                                                                                                                                                                                             |                                |
| 45 |                                                                                                                                                                                                                                                                                                             |                                |
| 46 |                                                                                                                                                                                                                                                                                                             |                                |
| 47 |                                                                                                                                                                                                                                                                                                             |                                |

|                |                                                                                                                                                                                                                                                                                                                                                                    |                                           |
|----------------|--------------------------------------------------------------------------------------------------------------------------------------------------------------------------------------------------------------------------------------------------------------------------------------------------------------------------------------------------------------------|-------------------------------------------|
| 1<br>2<br>3    | Tonnesen P, Carrozzi L, Fagerstrom KO, <i>et al.</i> Smoking cessation in patients with respiratory diseases: a high priority, integral component of therapy. <i>Eur Respir J</i> 2007; <b>29</b> :390–417. doi:10.1183/09031936.00060806                                                                                                                          | No TG specific recommendation.            |
| 4<br>5         | Trans Guidance for CofE Schools. <i>Ther Today</i> 2017; <b>28</b> :7. <a href="https://www.bacp.co.uk/media/2350/bacp-therapy-today-dec17.pdf">https://www.bacp.co.uk/media/2350/bacp-therapy-today-dec17.pdf</a>                                                                                                                                                 | Not a CPG.                                |
| 6<br>7<br>8    | UCSF Transgender Care. <i>Guidelines for the Primary and Gender-Affirming Care of Transgender and Gender Nonbinary People</i> . 2nd ed. San Francisco: Department of Family and Community Medicine University of California San Francisco 2016. <a href="https://transcare.ucsf.edu/guidelines">https://transcare.ucsf.edu/guidelines</a>                          | Single country.                           |
| 9<br>10        | Vale K, Johnson TW, Jansen MS, <i>et al.</i> The development of standards of care for individuals with a male-to-eunuch gender identity disorder. <i>Int J Transgenderism</i> 2010; <b>12</b> :40–51. doi:10.1080/15532731003749095                                                                                                                                | Not a CPG.                                |
| 11<br>12       | Walton HM, Baker SL. Treating Transgender Individuals in Inpatient and Residential Mental Health Settings. <i>Cogn Behav Pract</i> 2019; <b>26</b> :592–602. doi:10.1016/j.cbpra.2017.09.006                                                                                                                                                                       | Not a CPG. Single country.                |
| 13<br>14       | Webb AJ, McManus D, Rouse GE, <i>et al.</i> Implications for medication dosing for transgender patients: A review of the literature and recommendations for pharmacists. <i>Am J Heal Pharm</i> 2020; <b>77</b> :427–33. doi:10.1093/ajhp/zxz355                                                                                                                   | Single country.                           |
| 15<br>16       | Whitehead-Pleaux A, Donnenwerth A, Robinson B, <i>et al.</i> Lesbian, gay, bisexual, transgender, and questioning: Best practices in music therapy. <i>Music Ther Perspect</i> 2012; <b>30</b> :158–66. doi:10.1093/mtp/30.2.158                                                                                                                                   | Not a CPG. Single country.                |
| 17<br>18       | Wood BR, Spach DH. HIV in Sexual and Gender Minority Populations. <i>Natl. HIV Curric</i> . 2020. <a href="https://www.hiv.uw.edu/go/key-populations/hiv-sexual-gender-minority-populations/core-concept/all">https://www.hiv.uw.edu/go/key-populations/hiv-sexual-gender-minority-populations/core-concept/all</a>                                                | Not a CPG. Single country.                |
| 19<br>20<br>21 | Workowski KA, Bolan GA. Centers for Disease Control and Prevention. Sexually transmitted diseases treatment guidelines, 2015 [published correction appears in <i>MMWR Recomm Rep</i> . 2015; <b>64</b> :924]. <i>MMWR Recomm Rep</i> . 2015; <b>64</b> :1–137.                                                                                                     | Single country.                           |
| 22<br>23       | World Anti-Doping Program. <i>TUE Physician Guidelines Transgender Athletes</i> . 1.1. 2019. <a href="https://www.wada-ama.org/en/resources/therapeutic-use-exemption-tue/medical-information-to-support-the-decisions-of-tuecs-7">https://www.wada-ama.org/en/resources/therapeutic-use-exemption-tue/medical-information-to-support-the-decisions-of-tuecs-7</a> | Not a CPG.                                |
| 24<br>25       | World Health Organization. <i>Consolidated guidelines on HIV prevention, diagnosis, treatment and care for key populations</i> . 2014. <a href="http://apps.who.int/iris/bitstream/10665/128048/1/9789241507431_eng.pdf?ua=1">http://apps.who.int/iris/bitstream/10665/128048/1/9789241507431_eng.pdf?ua=1</a>                                                     | Superseded (2016 version included).       |
| 26<br>27       | World Health Organization. <i>Guidelines on HIV self-testing and partner notification: supplement to consolidated guidelines on HIV testing services</i> . 2016. <a href="https://www.who.int/hiv/pub/vct/hiv-self-testing-guidelines/en/">https://www.who.int/hiv/pub/vct/hiv-self-testing-guidelines/en/</a>                                                     | No TG specific recommendation.            |
| 28<br>29       | World Health Organization. <i>Preventing Suicide A Community Engagement Toolkit</i> . 2018. <a href="https://apps.who.int/iris/bitstream/handle/10665/272860/9789241513791-eng.pdf">https://apps.who.int/iris/bitstream/handle/10665/272860/9789241513791-eng.pdf</a>                                                                                              | Not a CPG. No TG specific recommendation. |
| 30<br>31       | World Health Organization. <i>Priority interventions: HIV/AIDS prevention, treatment and care in the health sector</i> . 2010. <a href="https://www.who.int/hiv/pub/guidelines/9789241500234/en/">https://www.who.int/hiv/pub/guidelines/9789241500234/en/</a>                                                                                                     | Not a CPG.                                |
| 32<br>33       | Wright E, Grulich A, Roy K, <i>et al.</i> Australasian Society for HIV, Viral Hepatitis and Sexual Health Medicine HIV pre-exposure prophylaxis: clinical guidelines. Update April 2018. <i>J virus Erad</i> 2018; <b>4</b> :143–59. <a href="http://www.ncbi.nlm.nih.gov/pubmed/30050676">http://www.ncbi.nlm.nih.gov/pubmed/30050676</a>                         | Single country.                           |
| 34<br>35       | Wylie K, Barrett J, Besser M, <i>et al.</i> Good Practice Guidelines for the Assessment and Treatment of Adults with Gender Dysphoria. <i>Sex Relatsh Ther</i> 2014; <b>29</b> :154–214. doi:10.1080/14681994.2014.883353                                                                                                                                          | Single country.                           |
| 36<br>37<br>38 | Yeung H, Luk KM, Chen SC, <i>et al.</i> Dermatologic care for lesbian, gay, bisexual, and transgender persons: Epidemiology, screening, and disease prevention. <i>J Am Acad Dermatol</i> 2019; <b>80</b> :591–602. doi:10.1016/j.jaad.2018.02.045                                                                                                                 | Not a CPG. Single country.                |

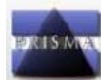

# PRISMA 2009 Checklist

1  
2  
3  
4  
5  
6  
7  
8  
9  
10  
11  
12  
13  
14  
15  
16  
17  
18  
19  
20  
21  
22  
23  
24  
25  
26  
27  
28  
29  
30  
31  
32  
33  
34  
35  
36  
37  
38  
39  
40  
41  
42  
43  
44  
45  
46  
47

| Section/topic                      | #  | Checklist item                                                                                                                                                                                                                                                                                              | Reported on page # |
|------------------------------------|----|-------------------------------------------------------------------------------------------------------------------------------------------------------------------------------------------------------------------------------------------------------------------------------------------------------------|--------------------|
| <b>TITLE</b>                       |    |                                                                                                                                                                                                                                                                                                             |                    |
| Title                              | 1  | Identify the report as a systematic review, meta-analysis, or both.                                                                                                                                                                                                                                         | 1                  |
| <b>ABSTRACT</b>                    |    |                                                                                                                                                                                                                                                                                                             |                    |
| Structured summary                 | 2  | Provide a structured summary including, as applicable: background; objectives; data sources; study eligibility criteria, participants, and interventions; study appraisal and synthesis methods; results; limitations; conclusions and implications of key findings; systematic review registration number. | 4                  |
| <b>INTRODUCTION</b>                |    |                                                                                                                                                                                                                                                                                                             |                    |
| Rationale                          | 3  | Describe the rationale for the review in the context of what is already known.                                                                                                                                                                                                                              | 7-9                |
| Objectives                         | 4  | Provide an explicit statement of questions being addressed with reference to participants, interventions, comparisons, outcomes, and study design (PICOS).                                                                                                                                                  | 10                 |
| <b>METHODS</b>                     |    |                                                                                                                                                                                                                                                                                                             |                    |
| Protocol and registration          | 5  | Indicate if a review protocol exists, if and where it can be accessed (e.g., Web address), and, if available, provide registration information including registration number.                                                                                                                               | 10                 |
| Eligibility criteria               | 6  | Specify study characteristics (e.g., PICOS, length of follow-up) and report characteristics (e.g., years considered, language, publication status) used as criteria for eligibility, giving rationale.                                                                                                      | 10-11              |
| Information sources                | 7  | Describe all information sources (e.g., databases with dates of coverage, contact with study authors to identify additional studies) in the search and date last searched.                                                                                                                                  | 11                 |
| Search                             | 8  | Present full electronic search strategy for at least one database, including any limits used, such that it could be repeated.                                                                                                                                                                               | W1 (Suppl)         |
| Study selection                    | 9  | State the process for selecting studies (i.e., screening, eligibility, included in systematic review, and, if applicable, included in the meta-analysis).                                                                                                                                                   | 12                 |
| Data collection process            | 10 | Describe method of data extraction from reports (e.g., piloted forms, independently, in duplicate) and any processes for obtaining and confirming data from investigators.                                                                                                                                  | 12-13              |
| Data items                         | 11 | List and define all variables for which data were sought (e.g., PICOS, funding sources) and any assumptions and simplifications made.                                                                                                                                                                       | N/A (in AGREE)     |
| Risk of bias in individual studies | 12 | Describe methods used for assessing risk of bias of individual studies (including specification of whether this was done at the study or outcome level), and how this information is to be used in any data synthesis.                                                                                      | AGREE              |
| Summary measures                   | 13 | State the principal summary measures (e.g., risk ratio, difference in means).                                                                                                                                                                                                                               | 14                 |
| Synthesis of results               | 14 | Describe the methods of handling data and combining results of studies, if done, including measures of consistency (e.g., $I^2$ for each meta-analysis). <a href="http://bmjopen.bmj.com/site/about/guidelines.xhtml">http://bmjopen.bmj.com/site/about/guidelines.xhtml</a>                                | N/A                |

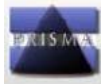

# PRISMA 2009 Checklist

Page 1 of 2

| Section/topic                 | #  | Checklist item                                                                                                                                                                                           | Reported on page # |
|-------------------------------|----|----------------------------------------------------------------------------------------------------------------------------------------------------------------------------------------------------------|--------------------|
| Risk of bias across studies   | 15 | Specify any assessment of risk of bias that may affect the cumulative evidence (e.g., publication bias, selective reporting within studies).                                                             | Within AGREE       |
| Additional analyses           | 16 | Describe methods of additional analyses (e.g., sensitivity or subgroup analyses, meta-regression), if done, indicating which were pre-specified.                                                         | None               |
| <b>RESULTS</b>                |    |                                                                                                                                                                                                          |                    |
| Study selection               | 17 | Give numbers of studies screened, assessed for eligibility, and included in the review, with reasons for exclusions at each stage, ideally with a flow diagram.                                          | 14 & Figure 1      |
| Study characteristics         | 18 | For each study, present characteristics for which data were extracted (e.g., study size, PICOS, follow-up period) and provide the citations.                                                             | 15 & Table 1       |
| Risk of bias within studies   | 19 | Present data on risk of bias of each study and, if available, any outcome level assessment (see item 12).                                                                                                | Table 2            |
| Results of individual studies | 20 | For all outcomes considered (benefits or harms), present, for each study: (a) simple summary data for each intervention group (b) effect estimates and confidence intervals, ideally with a forest plot. | Table 2            |
| Synthesis of results          | 21 | Present results of each meta-analysis done, including confidence intervals and measures of consistency.                                                                                                  | 15-16              |
| Risk of bias across studies   | 22 | Present results of any assessment of risk of bias across studies (see Item 15).                                                                                                                          | N/A                |
| Additional analysis           | 23 | Give results of additional analyses, if done (e.g., sensitivity or subgroup analyses, meta-regression [see Item 16]).                                                                                    | None               |
| <b>DISCUSSION</b>             |    |                                                                                                                                                                                                          |                    |
| Summary of evidence           | 24 | Summarize the main findings including the strength of evidence for each main outcome; consider their relevance to key groups (e.g., healthcare providers, users, and policy makers).                     | 17                 |
| Limitations                   | 25 | Discuss limitations at study and outcome level (e.g., risk of bias), and at review-level (e.g., incomplete retrieval of identified research, reporting bias).                                            | 17-18              |
| Conclusions                   | 26 | Provide a general interpretation of the results in the context of other evidence, and implications for future research.                                                                                  | 18-20              |
| <b>FUNDING</b>                |    |                                                                                                                                                                                                          |                    |
| Funding                       | 27 | Describe sources of funding for the systematic review and other support (e.g., supply of data); role of funders for the systematic review.                                                               | 3                  |

From: Moher D, Liberati A, Tetzlaff J, Altman DG, The PRISMA Group (2009). Preferred Reporting Items for Systematic Reviews and Meta-Analyses: The PRISMA Statement. PLoS Med 6(7): e1000097. doi:10.1371/journal.pmed1000097

For more information, visit: [www.prisma-statement.org](http://www.prisma-statement.org).

For peer review only - <http://bmjopen.bmj.com/site/about/guidelines.xhtml>

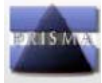

# PRISMA 2009 Checklist

| Section/topic                      | #  | Checklist item                                                                                                                                                                                                                                                                                              | Reported on page # |
|------------------------------------|----|-------------------------------------------------------------------------------------------------------------------------------------------------------------------------------------------------------------------------------------------------------------------------------------------------------------|--------------------|
| <b>TITLE</b>                       |    |                                                                                                                                                                                                                                                                                                             |                    |
| Title                              | 1  | Identify the report as a systematic review, meta-analysis, or both.                                                                                                                                                                                                                                         | 1                  |
| <b>ABSTRACT</b>                    |    |                                                                                                                                                                                                                                                                                                             |                    |
| Structured summary                 | 2  | Provide a structured summary including, as applicable: background; objectives; data sources; study eligibility criteria, participants, and interventions; study appraisal and synthesis methods; results; limitations; conclusions and implications of key findings; systematic review registration number. | 3-4                |
| <b>INTRODUCTION</b>                |    |                                                                                                                                                                                                                                                                                                             |                    |
| Rationale                          | 3  | Describe the rationale for the review in the context of what is already known.                                                                                                                                                                                                                              | 6-9                |
| Objectives                         | 4  | Provide an explicit statement of questions being addressed with reference to participants, interventions, comparisons, outcomes, and study design (PICOS).                                                                                                                                                  | 10, 12             |
| <b>METHODS</b>                     |    |                                                                                                                                                                                                                                                                                                             |                    |
| Protocol and registration          | 5  | Indicate if a review protocol exists, if and where it can be accessed (e.g., Web address), and, if available, provide registration information including registration number.                                                                                                                               | 9                  |
| Eligibility criteria               | 6  | Specify study characteristics (e.g., PICOS, length of follow-up) and report characteristics (e.g., years considered, language, publication status) used as criteria for eligibility, giving rationale.                                                                                                      | 10                 |
| Information sources                | 7  | Describe all information sources (e.g., databases with dates of coverage, contact with study authors to identify additional studies) in the search and date last searched.                                                                                                                                  | 10-11              |
| Search                             | 8  | Present full electronic search strategy for at least one database, including any limits used, such that it could be repeated.                                                                                                                                                                               | W1 (Suppl)         |
| Study selection                    | 9  | State the process for selecting studies (i.e., screening, eligibility, included in systematic review, and, if applicable, included in the meta-analysis).                                                                                                                                                   | 10-12              |
| Data collection process            | 10 | Describe method of data extraction from reports (e.g., piloted forms, independently, in duplicate) and any processes for obtaining and confirming data from investigators.                                                                                                                                  | 12                 |
| Data items                         | 11 | List and define all variables for which data were sought (e.g., PICOS, funding sources) and any assumptions and simplifications made.                                                                                                                                                                       | N/A (in AGREE)     |
| Risk of bias in individual studies | 12 | Describe methods used for assessing risk of bias of individual studies (including specification of whether this was done at the study or outcome level), and how this information is to be used in any data synthesis.                                                                                      | AGREE              |
| Summary measures                   | 13 | State the principal summary measures (e.g., risk ratio, difference in means).                                                                                                                                                                                                                               | 12                 |
| Synthesis of results               | 14 | Describe the methods of handling data and combining results of studies, if done, including measures of consistency (e.g., $I^2$ ) for each meta-analysis.                                                                                                                                                   | N/A                |



# PRISMA 2009 Checklist

| Section/topic                 | #  | Checklist item                                                                                                                                                                                           | Reported on page #    |
|-------------------------------|----|----------------------------------------------------------------------------------------------------------------------------------------------------------------------------------------------------------|-----------------------|
| Risk of bias across studies   | 15 | Specify any assessment of risk of bias that may affect the cumulative evidence (e.g., publication bias, selective reporting within studies).                                                             | Within AGREE          |
| Additional analyses           | 16 | Describe methods of additional analyses (e.g., sensitivity or subgroup analyses, meta-regression), if done, indicating which were pre-specified.                                                         | None                  |
| <b>RESULTS</b>                |    |                                                                                                                                                                                                          |                       |
| Study selection               | 17 | Give numbers of studies screened, assessed for eligibility, and included in the review, with reasons for exclusions at each stage, ideally with a flow diagram.                                          | 14 & Figure 1         |
| Study characteristics         | 18 | For each study, present characteristics for which data were extracted (e.g., study size, PICOS, follow-up period) and provide the citations.                                                             | 14-19, Table 1, W3,W4 |
| Risk of bias within studies   | 19 | Present data on risk of bias of each study and, if available, any outcome level assessment (see item 12).                                                                                                | Table 2               |
| Results of individual studies | 20 | For all outcomes considered (benefits or harms), present, for each study: (a) simple summary data for each intervention group (b) effect estimates and confidence intervals, ideally with a forest plot. | 19-24, Table 2        |
| Synthesis of results          | 21 | Present results of each meta-analysis done, including confidence intervals and measures of consistency.                                                                                                  | 19-24                 |
| Risk of bias across studies   | 22 | Present results of any assessment of risk of bias across studies (see Item 15).                                                                                                                          | N/A                   |
| Additional analysis           | 23 | Give results of additional analyses, if done (e.g., sensitivity or subgroup analyses, meta-regression [see Item 16]).                                                                                    | None                  |
| <b>DISCUSSION</b>             |    |                                                                                                                                                                                                          |                       |
| Summary of evidence           | 24 | Summarize the main findings including the strength of evidence for each main outcome; consider their relevance to key groups (e.g., healthcare providers, users, and policy makers).                     | 24                    |
| Limitations                   | 25 | Discuss limitations at study and outcome level (e.g., risk of bias), and at review-level (e.g., incomplete retrieval of identified research, reporting bias).                                            | 24-25                 |
| Conclusions                   | 26 | Provide a general interpretation of the results in the context of other evidence, and implications for future research.                                                                                  | 25-29                 |
| <b>FUNDING</b>                |    |                                                                                                                                                                                                          |                       |
| Funding                       | 27 | Describe sources of funding for the systematic review and other support (e.g., supply of data); role of funders for the systematic review.                                                               | 30                    |

From: Moher D, Liberati A, Tetzlaff J, Altman DG, The PRISMA Group (2009). Preferred Reporting Items for Systematic Reviews and Meta-Analyses: The PRISMA Statement. PLoS Med 6(7): e1000097. doi:10.1371/journal.pmed1000097

For more information, visit: [www.prisma-statement.org](http://www.prisma-statement.org).



# BMJ Open

## International Clinical Practice Guidelines for Gender Minority/Trans People: Systematic Review and Quality Assessment

|                                 |                                                                                                                                                                                                                                                                                                                                                                                                                                                                                                                                                                                                                                  |
|---------------------------------|----------------------------------------------------------------------------------------------------------------------------------------------------------------------------------------------------------------------------------------------------------------------------------------------------------------------------------------------------------------------------------------------------------------------------------------------------------------------------------------------------------------------------------------------------------------------------------------------------------------------------------|
| Journal:                        | <i>BMJ Open</i>                                                                                                                                                                                                                                                                                                                                                                                                                                                                                                                                                                                                                  |
| Manuscript ID                   | bmjopen-2021-048943.R1                                                                                                                                                                                                                                                                                                                                                                                                                                                                                                                                                                                                           |
| Article Type:                   | Original research                                                                                                                                                                                                                                                                                                                                                                                                                                                                                                                                                                                                                |
| Date Submitted by the Author:   | 22-Mar-2021                                                                                                                                                                                                                                                                                                                                                                                                                                                                                                                                                                                                                      |
| Complete List of Authors:       | Dahlen, Sara; King's College London, Department of Global Health & Social Medicine<br>Connolly, Dean; Newham University Hospital NHS Trust; King's College London Institute of Psychiatry Psychology and Neuroscience, Addictions Department<br>Arif, Isra; King's College London<br>Junejo, Muhammad; Chelsea and Westminster Hospital NHS Foundation Trust, Genitourinary Medicine<br>Bewley, Susan; King's College London, Department of Women and Children's Health, School of Life Course Sciences<br>Meads, Catherine; Anglia Ruskin University - Cambridge Campus, Faculty of Health, Medicine, Education and Social Care |
| <b>Primary Subject Heading</b>: | Health services research                                                                                                                                                                                                                                                                                                                                                                                                                                                                                                                                                                                                         |
| Secondary Subject Heading:      | Evidence based practice, Patient-centred medicine                                                                                                                                                                                                                                                                                                                                                                                                                                                                                                                                                                                |
| Keywords:                       | Protocols & guidelines < HEALTH SERVICES ADMINISTRATION & MANAGEMENT, Quality in health care < HEALTH SERVICES ADMINISTRATION & MANAGEMENT, Sexual and gender disorders < PSYCHIATRY, International health services < HEALTH SERVICES ADMINISTRATION & MANAGEMENT                                                                                                                                                                                                                                                                                                                                                                |
|                                 |                                                                                                                                                                                                                                                                                                                                                                                                                                                                                                                                                                                                                                  |

SCHOLARONE™  
Manuscripts



I, the Submitting Author has the right to grant and does grant on behalf of all authors of the Work (as defined in the below author licence), an exclusive licence and/or a non-exclusive licence for contributions from authors who are: i) UK Crown employees; ii) where BMJ has agreed a CC-BY licence shall apply, and/or iii) in accordance with the terms applicable for US Federal Government officers or employees acting as part of their official duties; on a worldwide, perpetual, irrevocable, royalty-free basis to BMJ Publishing Group Ltd ("BMJ") its licensees and where the relevant Journal is co-owned by BMJ to the co-owners of the Journal, to publish the Work in this journal and any other BMJ products and to exploit all rights, as set out in our [licence](#).

The Submitting Author accepts and understands that any supply made under these terms is made by BMJ to the Submitting Author unless you are acting as an employee on behalf of your employer or a postgraduate student of an affiliated institution which is paying any applicable article publishing charge ("APC") for Open Access articles. Where the Submitting Author wishes to make the Work available on an Open Access basis (and intends to pay the relevant APC), the terms of reuse of such Open Access shall be governed by a Creative Commons licence – details of these licences and which [Creative Commons](#) licence will apply to this Work are set out in our licence referred to above.

Other than as permitted in any relevant BMJ Author's Self Archiving Policies, I confirm this Work has not been accepted for publication elsewhere, is not being considered for publication elsewhere and does not duplicate material already published. I confirm all authors consent to publication of this Work and authorise the granting of this licence.

1  
2  
3  
4  
5  
6  
7  
8  
9  
10  
11  
12  
13  
14  
15  
16  
17  
18  
19  
20  
21  
22  
23  
24  
25  
26  
27  
28  
29  
30  
31  
32  
33  
34  
35  
36  
37  
38  
39  
40  
41  
42  
43  
44  
45  
46  
47  
48  
49  
50  
51  
52  
53  
54  
55  
56  
57  
58  
59  
60

1 International Clinical Practice Guidelines for Gender Minority/Trans People: Systematic  
2 Review and Quality Assessment

3

4 Sara Dahlen<sup>1</sup>, Bioethics & Society student [s.dahlen@doctors.org.uk](mailto:s.dahlen@doctors.org.uk) ORCID ID 0000-  
5 0002-1798-1816

6 Dean Connolly<sup>2, 3</sup>, Foundation Doctor and Visiting Researcher [dean.j.connolly@kcl.ac.uk](mailto:dean.j.connolly@kcl.ac.uk)  
7 ORCID ID 0000-0002-3139-4263

8 Isra Arif<sup>4</sup>, Medical student [isra.arif@kcl.ac.uk](mailto:isra.arif@kcl.ac.uk) ORCID ID 0000-0002-8623-206

9 Muhammad Hyder Junejo<sup>5</sup>, Junior Clinical Fellow [muhammad.junejo@nhs.net](mailto:muhammad.junejo@nhs.net) ORCID  
10 ID 0000-0003-2458-9991

11 Susan Bewley<sup>6</sup>, Professor Emeritus (Honorary) of Obstetrics and Women's Health  
12 [susan.bewley@kcl.ac.uk](mailto:susan.bewley@kcl.ac.uk) ORCID ID 0000-0001-8064-652X

13 Catherine Meads<sup>7\*</sup>, Professor of Health [catherine.meads@anglia.ac.uk](mailto:catherine.meads@anglia.ac.uk) ORCID ID 0000-  
14 0002-2368-0665

15 (1) Department of Global Health and Social Medicine, King's College London, Bush  
16 House, North East Wing, 40 Aldwych, London, WC2B 4BG, UK

17 (2) Newham University Hospital, Glen Rd, London, E13 8SL, UK

18 (3) Addictions Department Institute of Psychiatry, Psychology and Neuroscience, King's  
19 College London, 4 Windsor Walk, Denmark Hill, London, SE5 8BB, UK

20 (4) King's College London, Strand, London, WC2R 2LS, UK

21 (5) Genitourinary Medicine, Chelsea and Westminster Hospital NHS Foundation Trust,  
22 c/o 56 Dean Street, Soho, London W1D 6AE, UK

1  
2  
3 23 (6) Department of Women and Children's Health, School of Life Course Sciences,  
4  
5 24 King's College London, c/o 10<sup>th</sup> floor North Wing, St Thomas' Hospital, London SE1  
6  
7  
8 25 7EH, UK  
9

10 26 (7) Faculty of Health, Medicine, Education and Social Care, Anglia Ruskin University,  
11  
12 27 East Road, Cambridge, CB1 1PT, UK  
13

14 28 \*Corresponding author and reprint requests: Catherine Meads

15  
16  
17 29 Email: catherine.meads@anglia.ac.uk  
18

19 30 Tel: 07850 864327  
20  
21

22 31

23  
24 32 Short title: Quality of clinical practice guidelines for gender minority/trans people  
25

26 33 Keywords: Gender identity, gender minority, transgender, systematic review, clinical  
27  
28 34 practice guideline, AGREE II, quality appraisal  
29

30 35 Word count: 4,053 excluding acknowledgments, abstract, summary, tables, ethical  
31  
32 36 compliance/ licence statements, references and supplementary material  
33  
34

35 37

36  
37 38 Acknowledgments: We thank Richard Wakeford and Leena Järveläinen (information  
38  
39 39 specialists, British Library and Turku University Library), Gillian Claire Evans (German  
40  
41 40 translations), Sarah Peitzmeier, Sam Winter, Christina Richards and Riittakerttu Kaltiala  
42  
43 41 (opinion leaders), Paul Seed (statistician), researchers who shared copies of their papers,  
44  
45 42 the UK stakeholders who participated in the prioritisation exercise and the peer reviewers  
46  
47 43 whose feedback improved the work.  
48  
49  
50  
51  
52  
53  
54  
55  
56  
57  
58  
59  
60

1  
2  
3 44 **Structured abstract**  
4

5 45 **Objectives:** To identify and critically appraise published clinical practice guidelines  
6  
7  
8 46 (CPGs) regarding health care of gender minority/trans people.  
9

10 47 **Design:** Systematic review and quality appraisal using AGREE II (Appraisal of  
11  
12 48 Guidelines for Research and Evaluation tool), including stakeholder domain  
13  
14 49 prioritisation.  
15

16  
17 50 **Setting:** Six databases and six CPG websites were searched, and international key  
18  
19 51 opinion leaders approached.  
20

21 52 **Participants:** CPGs relating to adults and/or children who are gender minority/trans with  
22  
23 53 no exclusions due to comorbidities, except differences in sex development.  
24

25  
26 54 **Intervention:** Any health-related intervention connected to the care of gender  
27  
28 55 minority/trans people.  
29

30  
31 56 **Main outcome measures:** Number and quality of international CPGs addressing the  
32  
33 57 health of gender minority/trans people, information on estimated changes in mortality or  
34  
35 58 quality of life (QoL), consistency of recommended interventions across CPGs, and  
36  
37 59 appraisal of key messages for patients.  
38

39  
40 60 **Results:** Twelve international CPGs address gender minority/trans people's healthcare as  
41  
42 61 complete (n=5), partial (n=4) or marginal (n=3) focus of guidance. The quality scores  
43  
44 62 have a wide range and heterogeneity whichever AGREE II domain is prioritised. Five  
45  
46 63 higher-quality CPGs focus on HIV and other blood-borne infections (overall assessment  
47  
48 64 scores 69-94%). Six lower-quality CPGs concern transition-specific interventions (overall  
49  
50 65 assessment scores 11-56%). None deal with primary care, mental health, or longer-term  
51  
52 66 medical issues. Sparse information on estimated changes in mortality and QoL is  
53  
54  
55  
56  
57  
58  
59  
60

1  
2  
3 67 conflicting. Consistency between CPGs could not be examined due to unclear  
4  
5 68 recommendations within the World Professional Association of Transgender Health  
6  
7  
8 69 Standards of Care Version 7 and a lack of overlap between other CPGs. None provide  
9  
10 70 key messages for patients.

11  
12 71 **Conclusions:** A paucity of high-quality guidance for gender minority/trans people exists,  
13  
14 72 largely limited to HIV and transition, but not wider aspects of healthcare, mortality or  
15  
16  
17 73 QoL. Reference to AGREE II, use of systematic reviews, independent external review,  
18  
19 74 stakeholder participation and patient facing material might improve future CPG quality.

20  
21 75 **Trial registration:** PROSPERO (CRD42019154361)  
22  
23  
24  
25  
26  
27  
28  
29  
30  
31  
32  
33  
34  
35  
36  
37  
38  
39  
40  
41  
42  
43  
44  
45  
46  
47  
48  
49  
50  
51  
52  
53  
54  
55  
56  
57  
58  
59  
60

1  
2  
3 76 **Article summary**  
4

5 77 **Strengths and limitations of this study**  
6

- 7  
8 78 • First systematic review to identify and use a validated quality appraisal instrument  
9  
10 79 to assess all international CPGs addressing gender minority/trans health.  
11  
12 80 • International CPGs were studied due to their influential status in gender  
13  
14 81 minority/trans health, though further research is needed on national and local  
15  
16 82 CPGs.  
17  
18 83 • An innovative prioritisation exercise was performed to elicit stakeholders'  
19  
20 84 priorities and inform the setting of AGREE II quality thresholds, however those  
21  
22 85 stakeholder priorities may not be applicable outside the UK.  
23  
24 86 • An inclusive approach using wide criteria, extensive searches and approaching  
25  
26 87 key opinion leaders should have allowed the study to identify all relevant  
27  
28 88 international CPGs, however it is possible some may have been missed.  
29  
30  
31  
32  
33  
34  
35  
36  
37  
38  
39  
40  
41  
42  
43  
44  
45  
46  
47  
48  
49  
50  
51  
52  
53  
54  
55  
56  
57  
58  
59  
60

1  
2  
3  
4  
5  
6  
7  
8  
9  
10  
11  
12  
13  
14  
15  
16  
17  
18  
19  
20  
21  
22  
23  
24  
25  
26  
27  
28  
29  
30  
31  
32  
33  
34  
35  
36  
37  
38  
39  
40  
41  
42  
43  
44  
45  
46  
47  
48  
49  
50  
51  
52  
53  
54  
55  
56  
57  
58  
59  
60

## 89 **Introduction**

### 90 *Assessing the quality of clinical practice guidelines*

91 Evidence-based practice integrates best available research with clinical expertise and the  
92 patient's unique values and circumstances. High-quality clinical practice guidelines  
93 (CPGs) support high quality health care delivery. They can guide clinicians and policy  
94 makers to improve care, reduce variation in clinical practice, thereby affecting patient  
95 safety and outcomes. The Institute of Medicine defines CPGs as: "statements that include  
96 recommendations intended to optimise patient care that are informed by a systematic  
97 review of evidence and an assessment of the benefits and harms of alternative care  
98 options"[1], though other definitions exist[2]. Recommendations are used alongside  
99 professional judgement, directly or within decision aids, in training and practice. CPGs  
100 are important but have limitations depending on evidence selection and development  
101 processes[3]. GRADE (Grading of Recommendations, Assessment, Development and  
102 Evaluation) was developed to address the evidence that is selected and appraised during  
103 CPG development[4–6]. Using a systematic approach and transparent framework for  
104 developing and presenting summaries of evidence, GRADE is the most widely adopted  
105 tool worldwide for grading the quality of evidence and making recommendations[7], but  
106 does not alone ensure a CPG is high quality. Strength of evidence is only one component  
107 of what makes a 'good' CPG; factors such as transparency, rigour, independence,  
108 multidisciplinary input, patient and public involvement, avoidance of commercial  
109 influences and rapidity[8,9] should be also considered. Broader domains of CPG quality  
110 are included in the Appraisal of Guidelines for Research and Evaluation instrument  
111 AGREE II[10–12]. Despite widely recognized principles and methods for developing



1  
2  
3 112 sound CPGs, current research shows that guidelines on various topics lack appropriate  
4  
5 113 uptake of systematic review methodologies in their development[13], give  
6  
7  
8 114 recommendations that conflict with scientific evidence[14], or do not adequately take into  
9  
10 115 account existing CPG quality and reporting assessment tools[15]. This emphasizes the  
11  
12 116 ongoing need to appraise guidelines to ensure evidence-informed care.

### 14 117 *Healthcare for gender minority/trans people*

16  
17 118 ‘Trans’ is an umbrella term for individuals whose inner sense of self (gender identity) or  
18  
19 119 how they present themselves using visual or behavioural cues (gender expression) differs  
20  
21 120 from the expected stereotypes (gender) culturally assigned to their biological sex[16].  
22  
23  
24 121 Gender minority is an often-used alternative population description. Some gender  
25  
26 122 minority/trans people may seek medical transition, which involves interventions such as  
27  
28 123 hormones or surgery that alter physical characteristics and align appearance with gender  
29  
30 124 identity. Patient numbers referred to UK gender identity clinics and length of waiting lists  
31  
32 125 have increased in the last decade, particularly for adolescents[17], a phenomenon seen  
33  
34 126 elsewhere[18]. Gender minority/trans people may have continuing, sometimes complex,  
35  
36 127 life-long healthcare needs whether they undergo medical transition or not. Gender  
37  
38 128 minority/trans people may experience more mental health issues such as mood and  
39  
40 129 anxiety disorders[19], substance use[20], and higher rates of suicidal ideation[21]. They  
41  
42 130 may seek assistance with sexual health, mental health[22], substance use disorders[23],  
43  
44 131 prevention and/or management of HIV[24] as well as usual general health enquiries.  
45  
46  
47 132 However, they may encounter difficulties in accessing healthcare[25], reporting negative  
48  
49 133 healthcare experiences[26], discrimination and stigma[27,28]. Like all individuals,  
50  
51  
52  
53  
54  
55  
56  
57  
58  
59  
60

1  
2  
3 134 gender minority/trans people require high-quality evidence-based healthcare[25,29]  
4  
5 135 addressing general and specific needs.  
6  
7 136 *Guidelines used internationally and in the UK*  
8  
9  
10 137 The quality of current guidelines on gender minority/trans health is unclear. The World  
11  
12 138 Professional Association for Transgender Health (WPATH) Standards of Care Version 7  
13  
14 139 (SOCv7)[30] represent normative standards for clinical care, acting as a benchmark in  
15  
16 140 this field[31]. Globally, many national and local guidelines[32–35] are adaptations of,  
17  
18 141 acknowledge being influenced by, or are intended to complement WPATH SOCv7[30],  
19  
20 142 despite expressed reservations that WPATH SOCv7[30] is based on lower-quality  
21  
22 143 primary research, the opinions of experts and lacks grading of evidence[36].  
23  
24 144 In the UK, an advocacy group worked to incorporate WPATH SOCv7[30] into national  
25  
26 145 practice[37]. WPATH SOCv7[30] informs National Health Service (NHS) gender  
27  
28 146 identity clinics[38] and guidelines produced by the Royal College of Psychiatrists  
29  
30 147 (without use of GRADE)[39]. No CPGs were available from the National Institute for  
31  
32 148 Health and Care Excellence (NICE), Scottish Intercollegiate Guidelines Network (SIGN),  
33  
34 149 British Association of Gender Identity Specialists, British Psychological Society or other  
35  
36 150 medical Royal Colleges, although the Royal College of General Practitioners issued a  
37  
38 151 position statement on gender minority/trans healthcare in 2019[40]. Assessing quality of  
39  
40 152 international CPGs such as WPATH SOCv7[30] has practice implications for the  
41  
42 153 NHS[38] and private sector. CPGs with international scope may present additional  
43  
44 154 challenges (e.g. the implementability of key recommendations might not be easily  
45  
46 155 translated among different contexts) but they seem to influence discourse around gender  
47  
48 156 minority/trans health[36]. No prior study has investigated the number and quality of  
49  
50  
51  
52  
53  
54  
55  
56  
57  
58  
59  
60

1  
2  
3 157 guidelines to support the care and well-being of gender minority/trans people. The  
4  
5 158 purpose of this research was to identify and critically appraise all published international  
6  
7 159 CPGs for the healthcare of gender minority/trans people.  
8  
9

10 160

## 11 161 **Methods**

### 12 162 *Approach/ Research Design*

13  
14  
15 163 The rationale was to identify the key CPGs available to healthcare practitioners in this  
16  
17 164 field of clinical practice. Following preliminary searches, we chose international CPGs in  
18  
19 165 view of WPATH's influence within the UK and elsewhere, and to avoid 'double-  
20  
21 166 counting'. We considered AGREE II[10–12] the most appropriate tool; it is the most  
22  
23 167 comprehensively validated and evaluated instrument available for assessing  
24  
25 168 CPGs[41,42], designed for use by non-expert stakeholders[10] such as healthcare  
26  
27 169 providers, practicing clinicians and educators[11]. It benefits from clear instructions and  
28  
29 170 prompts regarding scoring and several people applying the criteria independently (a  
30  
31 171 minimum of two reviewers, but four are recommended). AGREE II synthesis calculates  
32  
33 172 quality scores from 23 appraisal criteria organised into six key domains (scope and  
34  
35 173 purpose, stakeholder involvement, rigour of development, clarity of presentation,  
36  
37 174 applicability, editorial independence) and an overall assessment of "Recommend for  
38  
39 175 use?" (Answer options; yes, no, yes if modified). This systematic review was conducted  
40  
41 176 according to a pre-specified PROSPERO protocol (CRD42019154361)  
42  
43 177 [https://www.crd.york.ac.uk/prospere/display\\_record.php?RecordID=154361](https://www.crd.york.ac.uk/prospere/display_record.php?RecordID=154361) uploaded  
44  
45 178 19<sup>th</sup> December 2019. The MEDLINE strategy was straightforward; although not formally  
46  
47 179 processed[43], it was peer-reviewed by one information specialist.  
48  
49  
50  
51  
52  
53  
54  
55  
56  
57  
58  
59  
60

1  
2  
3 180  
4

5 181 *Inclusion and exclusion criteria*  
6

7  
8 182 We defined CPGs as a systematically developed set of recommendations that assist  
9  
10 183 practitioners and patients in the provision of healthcare in specific circumstances,  
11  
12 184 produced after review and assessment of available clinical evidence[1,2,44–46]. CPGs  
13  
14 185 published after 1<sup>st</sup> January 2010 were eligible if they (or part thereof) specifically targeted  
15  
16 186 patients/population with gender minority/trans status and/or gender dysphoria, were  
17  
18 187 evidence-based, with some documentation of development methodology, had  
19  
20 188 international scope (more than one country, defined as a Member State of the United  
21  
22 189 Nations), and were an original source. We chose the timeframe to focus on the most  
23  
24 190 recent guidelines, currently applicable to practice, and to include WPATH SOCv7[30].  
25  
26 191 CPGs were eligible if they met the following inclusion criteria: participants/population  
27  
28 192 was adults and/or children who are gender minority/trans with no exclusion due to  
29  
30 193 comorbidities or age although differences/disorders in sex development (intersex) were  
31  
32 194 excluded; exposure/intervention was any health intervention related to gender dysphoria  
33  
34 195 or gender affirmation, or health concerns of gender minority/trans people, including  
35  
36 196 screening, assessment, referral, diagnosis and interventions. We excluded previous  
37  
38 197 versions of the same CPG. We used broad criteria because terminology has been in flux  
39  
40 198 with changes made in both International Classification of Diseases and Diagnostic and  
41  
42 199 Statistical Manual of Mental Disorders diagnostic criteria[16]. There were no restrictions  
43  
44 200 on setting or language.  
45  
46

47 201 *Search strategy and guideline selection*  
48  
49  
50  
51  
52  
53  
54  
55  
56  
57  
58  
59  
60

1  
2  
3 202 We conducted the searches up to 11<sup>th</sup> June 2020 (CM), using search terms and  
4  
5 203 appropriate synonyms (as MeSH terms and text words) that we developed based on  
6  
7 204 population and exposures (Web/Supplementary Table 1). We searched six databases  
8  
9 205 (EMBASE, MEDLINE, Web of Science, PsycINFO, CINAHL, LILACS) and six CPG  
10  
11 206 websites (Agency for Healthcare Research and Quality National Guideline Clearinghouse  
12  
13 207 [NGC], eGuidelines and Guidelines, National Institute for Health and Care Excellence  
14  
15 208 National Library for Health, Scottish Intercollegiate Guidelines Network, EBSCO  
16  
17 209 DynaMed Plus, Guidelines International Network Library) and the World Health  
18  
19 210 Organisation (WHO). The NGC closed in 2017 but CM hand-searched the archive. In  
20  
21 211 addition to protocol, individual reviewers (IA, DC, MJ) hand-searched four specialty  
22  
23 212 journals (International Journal of Transgender Health, Transgender Health, LGBT  
24  
25 213 Health, Journal of Homosexuality) to ensure key subject-relevant sources of abstracts  
26  
27 214 were thoroughly checked. In order to find potential grey literature CPGs outwith the  
28  
29 215 scholarly literature, two reviewers (IA, SD) independently performed four separate  
30  
31 216 Google searches (not GoogleScholar as mistated in the protocol) by using one generic  
32  
33 217 (clinical practice guidelines) plus one specific term (transgender, gender dysphoria, trans  
34  
35 218 health, or gender minority) and examining the first 100 hits. We identified International  
36  
37 219 Key Opinion Leaders via publications known to reviewers (DC, SD) (n=24) and  
38  
39 220 contacted them via one email and reminder to identify further guidelines. Reference lists  
40  
41 221 of relevant reviews and all full-text studies were hand-searched to identify any relevant  
42  
43 222 papers or CPGs not found by database searching. Two reviewers (SB, SD) independently  
44  
45 223 read all titles and abstracts and assessed for inclusion. If there was uncertainty or  
46  
47 224 disagreement, or reasonable suspicion that the full-text might lead to another relevant  
48  
49  
50  
51  
52  
53  
54  
55  
56  
57  
58  
59  
60

1  
2  
3 225 CPG, the full-text was obtained. Non-English abstracts were Google-translated but if a  
4  
5 226 possible CPG could not be reliably excluded, the full-text paper was obtained and  
6  
7 227 translated. Where full-text publications could not be accessed, we contacted authors  
8  
9 228 directly. Two reviewers (SB and either DC/MJ) independently carried out full-text  
10  
11 229 assessment to determine inclusion or exclusion from the systematic review based on the  
12  
13 230 above criteria, and noted reasons for excluding full-texts. The whole team discussed  
14  
15 231 uncertainties and disagreements to achieve consensus, with voting and final adjudication  
16  
17 232 by the senior author (CM).

### 21 233 *Data extraction*

22  
23  
24 234 Two reviewers (SB, SD) independently collected formal descriptive data of included  
25  
26 235 CPGs. All ambiguities or discrepancies were referred to the team for discussion and to re-  
27  
28 236 examine original texts and extract data. Information collected was title, author, year of  
29  
30 237 publication, number of countries covered, originating organisation, audience, methods  
31  
32 238 used, page and reference numbers (excluding accompanying materials), and funding. Key  
33  
34 239 recommendations were extracted for comparison between CPGs. We searched for all text  
35  
36 240 mentions of mortality or any measures of quality of life (QoL), and noted if accompanied  
37  
38 241 by a citation. All patient facing material was extracted. In addition, we extracted data  
39  
40 242 about publication outlet (journal/website), and whether the quantity of information  
41  
42 243 pertaining to the health of gender minority/trans people represented a complete, partial or  
43  
44 244 marginal proportion of recommendations in the CPG.

### 47 245 *Outcomes*

48  
49  
50 246 Outcomes were: the number and quality assessment (using AGREE II) of international  
51  
52 247 CPGs addressing the health of gender minority/trans people; analysis and comparison of  
53  
54  
55  
56  
57  
58  
59

1  
2  
3 248 the presence or absence of information on estimated changes in mortality or QoL (any  
4  
5 249 measure) following any specific recommended intervention, over any time interval; the  
6  
7  
8 250 consistency (or lack thereof) of recommendations across the CPGs; and the presence (or  
9  
10 251 absence) of key messages for patients.

### 12 252 *Quality assessment*

14 253 All authors completed AGREE II video training, a practice assessment, and two pilots  
15  
16  
17 254 whose results were discussed. The six reviewers (IA, SB, DC, SD, MJ, CM)  
18  
19 255 independently and anonymously completed quality scoring on every CPG by rating each  
20  
21 256 of the items using the standard proforma on the myAgree Plus online platform (AGREE  
22  
23  
24 257 Enterprise website)[11], which also calculated group appraisal scores.

### 26 258 *Patient and Public Involvement*

28 259 The AGREE II instrument generates quality scores but does not set specific parameters  
29  
30  
31 260 for what constitutes high quality, recommending that decisions about defining such  
32  
33 261 thresholds should be made prior to performing appraisals, considering relevant  
34  
35 262 stakeholders and the context in which the CPG is used[11]. To help set quality thresholds,  
36  
37  
38 263 we conducted an AGREE II domain prioritisation exercise in January 2020 via email,  
39  
40 264 with one reminder. It was considered impossible to ensure comprehensive representation  
41  
42 265 of international stakeholders. We chose the UK for feasibility, albeit validity might be  
43  
44 266 limited to the NHS. Fifty-two UK service-user stakeholder groups and gender  
45  
46  
47 267 minority/trans advocacy organisations, identified via reviewer knowledge and internet  
48  
49 268 searches (IA, SB, DC, SD, MJ, CM), were informed about the study. They were invited  
50  
51 269 to participate in a stakeholder prioritisation of the AGREE II domains, created using  
52  
53  
54 270 SurveyMonkey® and with an option to remain anonymous

1  
2  
3 271 (<https://www.surveymonkey.co.uk/r/WLZ55NQ> gives invitation wording, links to  
4  
5 272 resources and protocol). The reviewer team performed an anonymous prioritisation for  
6  
7  
8 273 comparison.

9  
10 274 *Strategy for Data and Statistical Analyses*

11  
12 275 Simple frequencies were used to present the stakeholder and reviewer priorities, and  
13  
14 276 outcomes. Following team discussion of the prioritisation exercise results, no pre-  
15  
16 277 specified quality threshold score was used to define high or low quality, although colour  
17  
18 278 was superimposed ( $\leq 30\%$ , 31-69% and  $\geq 70\%$ ) on the final scores table to aid visual  
19  
20  
21 279 comparisons and interpretation.

22  
23  
24 280

25  
26 281 **Results**

27  
28 282 *Search results*

29  
30  
31 283 Figure 1 (PRISMA flow chart[47]) shows that 1,815 citations were identified, of which  
32  
33 284 134 full-text publications were read (all available, three supplied by authors) and 122  
34  
35 285 excluded (Supplementary Table W2 with reasons).

36  
37 286 *Data extraction*

38  
39  
40 287 Table 1 shows the characteristics of the CPGs. Supplementary Tables W3 and W4 show  
41  
42 288 raw data of key recommendations and mortality and QoL evidence.

43  
44  
45 289 *Number and characteristics of Clinical Practice Guidelines*

46  
47 290 Twelve CPGs (Table 1) originated from: WHO (n=3)[48–50], WPATH (n=2)[30,51],  
48  
49 291 professional specialist/special-interest societies (n=4)[52–55], small groups of experts  
50  
51 292 (n=2)[56,57] and one consortium[58]. All were published in English, in journals[51–57],  
52  
53  
54 293 the organisation's website[48–50,58], or both[30]. Guideline development methodology



1  
2  
3 294 was variable, including use of systematic reviews (Table 1). Ten CPGs had no external  
4  
5 295 review, eight had no update plans. Gender minority/trans health recommendations made  
6  
7 296 up complete (n=5)[30,51,53,55,57], partial (n=4)[48–50,56] or marginal (n=3)[52,54,58]  
8  
9  
10 297 focus of content. CPGs contained 10 to 155 pages, and 20 to 505 references. Funding  
11  
12 298 sources were wide-ranging and sometimes multiple, from government agencies,  
13  
14 299 professional societies, charities and private donations. Two CPGs provided no funding  
15  
16  
17 300 details[52,56].  
18  
19  
20  
21  
22  
23  
24  
25  
26  
27  
28  
29  
30  
31  
32  
33  
34  
35  
36  
37  
38  
39  
40  
41  
42  
43  
44  
45  
46  
47  
48  
49  
50  
51  
52  
53  
54  
55  
56  
57  
58  
59  
60

1  
2  
3  
4  
5  
6  
7  
8  
9  
10  
11  
12  
13  
14  
15  
16  
17  
18  
19  
20  
21  
22  
23  
24  
25  
26  
27  
28  
29  
30  
31  
32  
33  
34  
35  
36  
37  
38  
39  
40  
41  
42  
43  
44  
45  
46  
47

301 **Table 1. General characteristics of included Clinical Practice Guidelines (n = 12)**  
302

| Number | Author (year)          | Full title                                                                                                            | Countries covered | Origin                                   | Primary Audience                                                                                                                            | Design (systematic review, SR, used and methods thereafter)                                                                                                          | Planned update given      | Funding                                                           |
|--------|------------------------|-----------------------------------------------------------------------------------------------------------------------|-------------------|------------------------------------------|---------------------------------------------------------------------------------------------------------------------------------------------|----------------------------------------------------------------------------------------------------------------------------------------------------------------------|---------------------------|-------------------------------------------------------------------|
| 1      | Coleman et al. (2012)  | Standards of care for the health of transsexual, transgender, and gender nonconforming people v7                      | Global            | WPATH                                    | Health professionals                                                                                                                        | Work groups submit manuscripts based on prior literature reviews, no explicit links of recommendations to evidence, expert consensus. No independent external review | No                        | Tawani Foundation and gift from anonymous donor                   |
| 2      | Davies et al. (2015)   | Voice and communication change for gender nonconforming individuals: giving voice to the person inside                | Global            | WPATH                                    | Speech-language therapists                                                                                                                  | Review of evidence. Expert consensus. No independent external review                                                                                                 | No                        | Transgender Health Information Program of British Columbia Canada |
| 3      | ECDC (2018)            | Public health guidance on HIV, hepatitis B and C testing in the EU/EEA                                                | EU/ EEA           | ECDC consortium CHIP, PHE, SSAT and EATG | Member States' Public Health Professionals who coordinate the development of national guidelines or programmes for HBV, HCV and HIV testing | 4 SRs, SIGN, NICE and AXIS checklists. Ad hoc internal and external expert panel, independent chair, expert consensus. No independent external review                | No                        | Commissioned by ECDC, contractor Rigshospitalet CHIP              |
| 4      | Gilligan et al. (2017) | Patient-clinician communication: American Society of Clinical Oncology consensus guideline                            | USA and others    | ASCO                                     | Clinicians who care for adults with cancer                                                                                                  | 9 questions (1 SR), expert consensus and a Delphi exercise. No independent external review                                                                           | Regular review 3 yr check | None declared                                                     |
| 5      | Hembree et al. (2017)  | Endocrine treatment of gender-dysphoric/ gender-incongruent persons: An Endocrine Society clinical practice guideline | Global            | Endocrine Society                        | Endocrinologists, trained mental health professionals and trained physicians                                                                | 2 SRs and GRADE, rest expert consensus. No independent external review                                                                                               | No                        | Endocrine Society                                                 |
| 6      | IAPHCCO (2015)         | IAPAC Guidelines for optimizing the HIV care continuum for adults and adolescents                                     | Global            | IAPAC                                    | Care providers, program managers, policymakers, affected communities, organizations, and health systems involved with                       | A systematic search of CDC database, expert consensus. No independent external review                                                                                | No                        | IAPAC, US NIH and Office of AIDS Research                         |

|    |                      |                                                                                                                                                                                                             |                                           |              |                                                                                                                                                                      |                                                                                                           |                            |                                               |
|----|----------------------|-------------------------------------------------------------------------------------------------------------------------------------------------------------------------------------------------------------|-------------------------------------------|--------------|----------------------------------------------------------------------------------------------------------------------------------------------------------------------|-----------------------------------------------------------------------------------------------------------|----------------------------|-----------------------------------------------|
| 7  | Ralph et al. (2010)  | Trauma, gender reassignment and penile augmentation                                                                                                                                                         | Not specified (international publication) | Author group | implementing HIV programs and/or delivering HIV care<br>Not stated (urological surgeons)                                                                             | No SR. Unclear if literature review. Leading experts' consensus opinion. No independent external review   | No                         | None declared                                 |
| 8  | Strang et al. (2016) | Initial clinical guidelines for co-occurring autism spectrum disorder and gender dysphoria or incongruence in adolescents                                                                                   | Not specified (international publication) | Author group | Clinicians                                                                                                                                                           | No SR or literature review. 2-stage Delphi consensus. No independent external review                      | No                         | Isadore and Bertha Gudelsky Family Foundation |
| 9  | T'SJoen              | ESSM Position Statement "Assessment and hormonal management in adolescent and adult trans people, with attention for sexual function and satisfaction"                                                      | Europe                                    | ESSM         | European clinicians working in transgender health, sexologists and other health-care professionals                                                                   | No SR. Leading experts' consensus opinion. No independent external review                                 | No                         | ESSM                                          |
| 10 | WHO (2011)           | Prevention and treatment of HIV and other sexually transmitted infections among men who have sex with men and transgender people. Recommendations for a public health approach                              | Global                                    | WHO          | National public health officials and managers of HIV/AIDS and STI programmes, NGOs inc. community and civil society organizations, and health workers                | 13 SRs for PICOs and GRADE, external GDG, and independent external review                                 | Yes in 2015                | BMZ & PEPFAR through CDC & USAID              |
| 11 | WHO (2012)           | Guidance on oral pre-exposure prophylaxis for serodiscordant couples, men and transgender women who have sex with men at high risk of HIV. Recommendations for use in the context of demonstration projects | Global                                    | WHO          | Countries/ Member States                                                                                                                                             | 4 SRs (inc values and preferences reviews) and GRADE, external GDG, and independent external review group | Yes in 2015                | Bill and Melinda Gates Foundation             |
| 12 | WHO (2016)           | Consolidated guidelines on HIV prevention, diagnosis, treatment and care for key populations. 2016 update                                                                                                   | Global                                    | WHO          | National HIV programme managers and other decision-makers within ministries of health and those responsible for health policies, programmes and services in prisons. | 2 new SRs in revised guidance, GRADE, external GDGs, and 79 independent external peer reviewers           | Regular updates; no detail | UNAIDS, PEPFAR, Global Fund                   |

303 **Key:** AACE, American Association of Clinical Endocrinologists; ASA, American Society of Andrology; ASCO, American Society of Clinical Oncology; ASD, autism spectrum  
 304 disorder; AXIS, Appraisal Tool for Cross-Sectional Studies; BMZ, German Federal Ministry for Economic Cooperation and Development; CDC, the Centers for Disease Control  
 305 and Prevention; CHIP, CHIP/Region H, Rigshospitalet, University of Copenhagen; CPG, clinical practice guideline; EATG, European Aids Treatment Group; EAU, European

1  
2  
3  
4  
5  
6  
7  
8  
9  
10  
11  
12  
13  
14  
15  
16  
17  
18  
19  
20  
21  
22  
23  
24  
25  
26  
27  
28  
29  
30  
31  
32  
33  
34  
35  
36  
37  
38  
39  
40  
41  
42  
43  
44  
45  
46  
47

306 Association of Urology; ECDC, European Centre for Disease Prevention and Control; ESE, European Society of Endocrinology; ESPE, European Society for Pediatric  
307 Endocrinology; ESSM, European Society for Sexual Medicine EU/EEA, European Union/ European Economic Area; Global Fund, Global Fund to Fight AIDS, Tuberculosis and  
308 Malaria; GDG, guideline development group; GRADE, Grading of Recommendations, Assessment, Development, and Evaluation; IAPAC, International Association of Providers of  
309 AIDS Care; IAPHCCO, International advisory panel on HIV care continuum optimization; NGO non governmental organisations; NICE, National Institute of Health and Care  
310 Excellence; NIH, National Institutes of Health; PEPFAR, US President’s Emergency Plan for AIDS Relief; PES Pediatric Endocrine Society; PHE, Public Health England; SIGN,  
311 Scottish Intercollegiate Guidelines Network; SR, systematic review; SSAT, St Stephen’s AIDS Trust; UNAIDS, The Unified Budget, Results and Accountability Framework of the  
312 Joint United Nations Programme on HIV/AIDS; USA, United States of America; USAID, US Agency for International Development; WHO, World Health Association; WPATH,  
313 World Professional Association for Transgender Health.

For peer review only

1  
2  
3 314 A thirteenth CPG was excluded post-scoring as it had been superseded by a 2020 version  
4  
5 315 without recommendations for gender minority/trans people[59]. It was arguable if four  
6  
7 316 included CPGs did meet criteria: one had not been withdrawn[48]; one contained  
8  
9  
10 317 minimal relevant content[52]; one might not have been intended as a CPG[30] (although  
11  
12 318 WPATH SOCV7's stated overall goal is "to provide clinical guidance for health  
13  
14 319 professionals"[30] it contains no list of key recommendations nor auditable quality  
15  
16 320 standards, yet is widely used to compare procedures covered by US providers[60,61]);  
17  
18  
19 321 one variously described itself as 'position statement' and 'position study' (stating it did  
20  
21 322 "not aim to provide detailed clinical guidelines for professionals such as...  
22  
23 323 [named][30,53]", but evidence was obviously linked to key recommendations for  
24  
25 324 clinicians[55]). After discussion it was decided not to exclude these borderline CPGs, as  
26  
27  
28 325 the definition of CPG in the protocol was intended to favour an inclusive approach.  
29

### 30 326 *Quality prioritisation and assessment*

31  
32  
33 327 Results of the domain prioritisation by stakeholders (n=19 replies, response rate 39%  
34  
35 328 excluding 3 'undeliverable') and reviewers (n=6) showed that stakeholders prioritised  
36  
37 329 stakeholder involvement, whereas the research team prioritised methodological rigour  
38  
39 330 (Supplementary Table W5). No stakeholder asked for clarification or more information.  
40  
41  
42 331 Table 2 shows AGREE II scores by domain (8-94%), and overall (11-94%). The quality  
43  
44 332 scores have a wide range and heterogeneity. Five CPGs focused on trans people as a key  
45  
46 333 population for HIV and other blood-borne infections (overall assessment scores 69-94%).  
47  
48 334 Six CPGs concerned transition-specific interventions (overall assessment scores 11-56%).  
49  
50 335 Transition-related CPGs tended to lack methodological rigour and rely on patchier,  
51  
52 336 lower-quality primary research. The two prioritised domain scores were usually  
53  
54  
55  
56  
57  
58  
59  
60

1  
2  
3 337 comparable with the overall AGREE II quality assessment (ranges; stakeholder  
4  
5 338 involvement 14-93%, methodological rigour 17-87%). Four CPGs obtained a majority  
6  
7 339 opinion 'recommend for use'[48-50,58], five CPGs had unanimous 'do not  
8  
9 340 recommend'[30,51,55-57], and three had minority support with division about the extent  
10  
11 341 of 'yes, if modified' [52-54](Table 2). Despite wide variation there was a pattern; HIV  
12  
13 342 and blood-borne infection guidelines[48-50,54,58] were higher quality, and those  
14  
15 343 focusing on transition were lower quality[30,53,55-57].  
16  
17  
18  
19  
20  
21  
22  
23  
24  
25  
26  
27  
28  
29  
30  
31  
32  
33  
34  
35  
36  
37  
38  
39  
40  
41  
42  
43  
44  
45  
46  
47  
48  
49  
50  
51  
52  
53  
54  
55  
56  
57  
58  
59  
60

344 **Table 2. AGREE II domain percentages and overall assessment of included guidelines, and summary of**  
 345 **mortality/quality of life measures (n = 12)**  
 346

| Number | Author (year)          | Scope and purpose | Stakeholder Involvement | Rigour of development | Clarity and presentation | Applicability | Editorial independence | Overall Assessment | Recommendation to use       | Mortality | Quality of Life | Mortality (any comment) and Quality of Life (any formal measure)                                                                                                                                  |
|--------|------------------------|-------------------|-------------------------|-----------------------|--------------------------|---------------|------------------------|--------------------|-----------------------------|-----------|-----------------|---------------------------------------------------------------------------------------------------------------------------------------------------------------------------------------------------|
| 1      | Coleman et al. (2012)  | 63%               | 47%                     | 20%                   | 37%                      | 16%           | 15%                    | 31%                | Yes 0 No 5<br>If modified 1 | Y         | Y               | M: Higher in post SRS vs matched no SRS, and both pre and post SRS vs. gen popn. QoL: FtM < gen popn, FtM post breast/chest surgery > not surgery, mixed results at 15 yrs.                       |
| 2      | Davies et al. (2015)   | 62%               | 38%                     | 17%                   | 61%                      | 28%           | 14%                    | 28%                | Yes 0 No 3<br>If modified 3 | N         | Y               | QoL: A voice-related TG QoL measure correlated with own and others' perception.                                                                                                                   |
| 3      | ECDC (2018)            | 94%               | 56%                     | 55%                   | 76%                      | 68%           | 38%                    | 69%                | Yes 4 No 0<br>If modified 2 | Y         | Y               | M: Reduced by early diagnosis. QoL: Cost/QALY in anti-HCV birth cohort screening is acceptable. Universal offer HIV testing in hospital settings is highly cost effective.                        |
| 4      | Gilligan et al. (2017) | 84%               | 67%                     | 66%                   | 81%                      | 47%           | 61%                    | 78%                | Yes 2 No 0<br>If modified 4 | N         | N               |                                                                                                                                                                                                   |
| 5      | Hembree et al. (2017)  | 65%               | 40%                     | 41%                   | 73%                      | 29%           | 65%                    | 56%                | Yes 1 No 2<br>If modified 3 | Y         | Y               | M: TW/TM's CV mortality same ("insufficient very low quality data" for TM) and younger age at death after SRS. QoL: long term psychological and psychiatric issues post SRS.                      |
| 6      | IAPHCCO (2015)         | 85%               | 56%                     | 61%                   | 87%                      | 40%           | 63%                    | 81%                | Yes 3 No 0<br>If modified 3 | Y         | Y               | M: Lower if early ART, easy access, immediate ART, and community distribution. QoL: ART preserves QoL, and stigma and mental health impact on QoL.                                                |
| 7      | Ralph et al. (2010)    | 45%               | 14%                     | 19%                   | 64%                      | 5%            | 32%                    | 28%                | Yes 0 No 5<br>If modified 1 | N         | N               |                                                                                                                                                                                                   |
| 8      | Strang et al. (2016)   | 57%               | 33%                     | 19%                   | 39%                      | 8%            | 25%                    | 11%                | Yes 0 No 6<br>If modified 0 | N         | N               |                                                                                                                                                                                                   |
| 9      | T'Sjoen et al. (2020)  | 59%               | 37%                     | 35%                   | 58%                      | 15%           | 33%                    | 42%                | Yes 0 No 4<br>If modified 2 | N         | Y               | QoL: Sexual life improves after GAMI, but not to non-TG levels.                                                                                                                                   |
| 10     | WHO (2011)             | 94%               | 89%                     | 87%                   | 86%                      | 64%           | 82%                    | 83%                | Yes 5 No 0<br>If modified 1 | Y         | Y               | M: Looked for mortality evidence but none found. QoL: Positive QALYs if HIV averted.                                                                                                              |
| 11     | WHO (2012)             | 85%               | 60%                     | 81%                   | 76%                      | 41%           | 72%                    | 72%                | Yes 4 No 0<br>If modified 2 | N         | Y               | QoL: Positive QALYs modelled if PrEP.                                                                                                                                                             |
| 12     | WHO (2016)             | 94%               | 93%                     | 81%                   | 89%                      | 84%           | 65%                    | 94%                | Yes 5 No 0<br>If modified 1 | Y         | N               | M: Lower if access and adhere to OST and at prison release, if early ART and complete TB Rx, HBV/ HCV managed; and access to post abortion care. Worse if food insecure, poor nutrition, low BMI. |

1  
2  
3  
4  
5  
6  
7  
8  
9  
10  
11  
12  
13  
14  
15  
16  
17  
18  
19  
20  
21  
22  
23  
24  
25  
26  
27  
28  
29  
30  
31  
32  
33  
34  
35  
36  
37  
38  
39  
40  
41  
42  
43  
44  
45  
46  
47

347 **Key:** ART, antiretroviral therapy; CV, cardiovascular; ECDC, European Centre for Disease Prevention and Control; FtM, female-to-male; gen popn, general population; GAMI,  
348 gender affirming medical intervention; HBV, hepatitis B virus; HCV, hepatitis C virus; HIV, human immuno-deficiency virus; IAPHCCO, International advisory panel on HIV care  
349 continuum optimization; M, mortality; OST, opiate substitute therapy; PrEP, pre-exposure prophylaxis; QALY, quality adjusted life year; QoL, Quality of life; Rx, treatment; SR,  
350 systematic review; SRS, sex reassignment surgery; TB, tuberculosis; TG, trans people/gender-minority; TM, trans man; TW, trans woman; WHO, World Health Association. Two  
351 prioritised domains for **stakeholders** and **research team**. Colours to aid interpretation (not thresholds) ≤30 **RED**, 31-69 **AMBER**, ≥70 **GREEN**

For peer review only



1  
2  
3 352 *Content*  
4

5 353 Four CPGs concerning HIV prevention, transmission and care[48–50,54], and one public  
6  
7 354 health guideline on population screening for blood-borne viruses[58], contained  
8  
9  
10 355 recommendations for gender minority/trans people as a ‘key population’. Three CPGs  
11  
12 356 were devoted to overall transition care for all gender minority/trans people[30,53,55], two  
13  
14 357 to an aspect of transition[51,56], and one to transition in a specific group[57]. One  
15  
16 358 oncology communication guideline contained a single recommendation relating to gender  
17  
18 359 minority/trans people[52]. No international guidelines were found that addressed primary  
19  
20 360 care, psychological support/mental health interventions, or general medical/chronic  
21  
22 361 disease care (such as cardiovascular, cancer or elderly care).  
23  
24  
25

26 362 *Mortality and Quality of Life*  
27

28 363 Six CPGs referred to mortality[30,48,50,53,54,58] and eight to QoL[30,48,49,51,53–  
29  
30 364 55,58] (Table 2). Supplementary Table W4 shows all extractions of sentences relating to  
31  
32 365 mortality or morbidity, associated references and which CPGs included no such data.  
33  
34 366 More robust evidence was linked to the recommendations in the HIV and blood-borne  
35  
36 367 virus CPGs whereas there was little, inconsistent data and poorer linking to evidence in  
37  
38 368 transition-related CPGs.  
39  
40  
41

42 369 *Consistency of recommendations across the CPGs*  
43

44 370 Supplementary Table W5 contains all extracted key recommendations where these could  
45  
46 371 be distinguished. It shows little overlap of topic content across the CPGs. Many  
47  
48 372 recommendations in WHO 2011[48] and 2016[50] were similar, but not identical, the  
49  
50 373 former not being stood down after the latter was published. No statements were  
51  
52 374 highlighted by the WPATH SOCV7[30] authors as key recommendations, and it proved  
53  
54  
55  
56  
57  
58  
59  
60

1  
2  
3 375 impossible for all six reviewers independently performing data extraction to identify  
4  
5 376 them. The total number of extracted recommendations ranged between 0 to 168 with little  
6  
7  
8 377 consistency or agreement on what passages were selected. Some extracted statements  
9  
10 378 might have been intended as recommendations or standards, but many were flexible,  
11  
12 379 disconnected from evidence and could not be used by individuals or services to  
13  
14 380 benchmark practice. After discussion of this incoherence within WPATH SOCv7[30] and  
15  
16 381 our inability therefore to compare recommendations across all CPGs, it was decided not  
17  
18  
19 382 to revisit inclusions post hoc but to abandon this protocol aim.

20  
21 383 *Patient facing material*

22  
23  
24 384 No patient-facing material was found in any guideline.

25  
26 385

27  
28 386 **Discussion**

29  
30 387 *Statement of principal findings*

31  
32  
33 388 Variable quality international CPGs regarding gender minority/trans people's healthcare  
34  
35 389 contain little, conflicting information on mortality and QoL, no patient facing messages  
36  
37 390 and inconsistent use of systematic reviews in generating recommendations. A major  
38  
39 391 finding is that the scope of the guidelines is confined to HIV/STI prevention or  
40  
41 392 management of transition with an absence of guidelines relating to other medical issues.  
42  
43 393 WPATH SOCv7[30] cannot be considered 'gold standard'.

44  
45 394 *Strengths and weaknesses of this study*

46  
47 395 Strengths include protocol preregistration, stakeholder involvement, piloting all stages, an  
48  
49 396 extensive systematic search without language restriction for any relevant current  
50  
51 397 guidelines, wide inclusion criteria including grey literature, use of key opinion leaders,  
52  
53  
54  
55  
56  
57  
58  
59

1  
2  
3 398 close attention to avoidance of bias, double full-text reading and data entry, and careful  
4  
5 399 presentation of results. Six trained reviewers, exceeding AGREE II  
6  
7 400 recommendations[11], compensated for expected variation in scoring. Extensive searches  
8  
9 401 should have mitigated loss of CPGs. Limitations include some uncertainty about  
10  
11 402 stakeholder understanding despite a good response rate, and generalisability of the  
12  
13 403 prioritisation only to the UK; stakeholders elsewhere might have different priorities.  
14  
15 404 Focusing only on international CPGs might have missed higher quality national and local  
16  
17 405 CPGs derived from them or written de novo. The social acceptance and consequent  
18  
19 406 healthcare system coverage of gender minority/trans health related interventions vary  
20  
21 407 among different countries, which may limit the space for international and multinational  
22  
23 408 guidelines. While the search strategy yielded an oncology communication CPG with a  
24  
25 409 single recommendation for gender minority/trans people[52], other general health CPGs  
26  
27 410 with similar solo statements might have been missed.

32  
33 411 *Comparison with other studies, discussing important differences in results*

34  
35 412 This is the first systematic review using a validated quality appraisal instrument of  
36  
37 413 international CPGs addressing gender minority/trans health. It may act as a benchmark to  
38  
39 414 monitor and improve population healthcare. CPG quality results correspond with, and  
40  
41 415 quantitatively confirm, previously noted concerns about the evidence-base[36,62,63] and  
42  
43 416 variable use of quality assessment in systematic reviews[64–66], in a healthcare field  
44  
45 417 with unknown or unclear longitudinal outcomes[17]. AGREE II has been applied to  
46  
47 418 CPGs in other medical areas, including cancer[67], diabetes[68], pregnancy[69] and  
48  
49 419 depression[70]. These exercises tend to show room for improvement. Developers have  
50  
51 420 been criticised for not using methodological rigour when writing reliable evidence-based  
52  
53  
54  
55  
56  
57  
58  
59

1  
2  
3 421 guidelines[71], as well as not implementing high-quality CPGs[72]. Thus, finding poor  
4  
5 422 quality CPGs is not confined to this area of healthcare[73]. Improvement messages are  
6  
7  
8 423 generalisable to other specialties.

9  
10 424 *Meaning of the study: possible explanations*

11  
12 425 The finding of higher-quality, but narrow, focus on gender minority/trans people's  
13  
14 426 healthcare for blood-borne infections may relate to the global HIV pandemic and the  
15  
16  
17 427 WHO applying twin lenses of public health and human rights (i.e. the population as  
18  
19 428 'means' and 'ends'). The lower-quality CPGs focus on transition. WPATH SOCv7[30]  
20  
21 429 originated nearly a decade ago from a special-interest association, diagnostic criteria and  
22  
23  
24 430 CPG methodology have since changed. Although HIV and transition are important, it is  
25  
26 431 puzzling to have found so little else, maybe suggesting CPGs for gender minority/trans  
27  
28 432 people have been driven by provider-interests rather than healthcare needs. Including  
29  
30  
31 433 gender minority/trans people in guidelines can be considered a matter of health equity,  
32  
33 434 where CPGs have a role to play[74]. GRADE suggests CPG developers may consider  
34  
35 435 equity at various stages in creating guidelines, such as deciding guideline questions,  
36  
37  
38 436 evidence searching, and assembly of the guideline group[75]. How CPGs may impact  
39  
40 437 more vulnerable members of society should be reflected-upon during guideline  
41  
42 438 development[76], and implementation[77].

43  
44  
45 439 *Implications for clinicians, UK and international policymakers, and patients*

46  
47 440 Clinicians should be made aware that gender minority/trans health CPGs outside of HIV-  
48  
49 441 related topics are linked to a weak evidence base, with variations in methodological  
50  
51 442 rigour and lack of stakeholder involvement. While patient care plans ought to take into  
52  
53  
54 443 account the individual needs of each gender minority/trans person, a gap appears to exist

1  
2  
3 444 between clinical practice and research in this field[78]. Clinicians should proceed with  
4  
5 445 caution, explain uncertainties to patients and recruit to research.  
6

7 446 Policymakers ought to invest in both primary research and high-quality systematic  
8  
9 447 reviews in areas relevant for CPG and service development. Organisations producing  
10  
11 448 guidelines and aspiring to higher-level quality could use more robust methods, handling  
12  
13 449 of competing interests[79,80], and quality assessment. CPG developers should label key  
14  
15 450 recommendations clearly. Although editorial independence was lowest priority for  
16  
17 451 stakeholders, independent external review is important to avoid biases and bad practices,  
18  
19 452 examine use of resources, resist commercial interests, and gain widespread credibility  
20  
21 453 outside the field.  
22  
23  
24

25  
26 454 The UK is fortunate in being familiar with developing priority-setting partnerships (e.g.  
27  
28 455 James Lind Initiative[81]) and generating suites of clinical questions that might cover all  
29  
30 456 steps in patient pathways (e.g. in partnership with Cochrane Collaboration[82]). These  
31  
32 457 could underpin multidisciplinary and funded research priorities whose results feed into  
33  
34 458 future better evidence-based CPGs. Implications for UK education and curricular content  
35  
36 459 (e.g. new gender identity healthcare credentials[83]), should be carefully scrutinised.  
37

38 460 Internationally, CPG development and implementation will vary depending on local  
39  
40 461 country contexts and available resources. Those countries with quality assurance agencies  
41  
42 462 might use them for external assurance. Countries might reconsider the wisdom of  
43  
44 463 adapting low-quality ‘off the shelf’ international CPGs without due assessment of the  
45  
46 464 evidence for recommendations (e.g. using the GRADE Adolopment framework[84]).  
47  
48 465 WHO demonstrates how CPGs can achieve high quality.  
49  
50  
51  
52  
53  
54  
55  
56  
57  
58  
59  
60

1  
2  
3 466 Patients should be positively encouraged to engage with CPG development as  
4  
5 467 stakeholders. The lack of patient-facing material should be addressed, especially as  
6  
7 468 medical and non-medical online material contains jargon, is unreliable and potentially  
8  
9 469 misleading[85]. Future CPGs should be populated with patient-facing decision aids (e.g.  
10  
11 470 Fact Boxes[86] and icon arrays[87]) that explain sizes of benefits and harms to support  
12  
13 471 informed patient choice. Patients and carers will benefit from a more focused approach to  
14  
15 472 throughout-life healthcare. As the figures for gender minority/trans patients increase  
16  
17 473 within the NHS and internationally, so does the need for consistent guidance to clinicians  
18  
19 474 across specialisms on specific risks to, and means of treating, this population. Current  
20  
21 475 patients should be welcomed to contribute, where they are comfortable, to any research  
22  
23 476 being undertaken by their clinicians, in order to improve data and future practice for  
24  
25 477 gender minority/trans health.

#### 30 478 *Unanswered questions and future research*

31  
32  
33 479 This study should be replicated as new iterations of international CPGs become available.  
34  
35 480 It can be applied to national guidelines and countries should perform their own  
36  
37 481 stakeholder prioritisation. When ‘best available evidence’ is poor, quality improvement  
38  
39 482 can be driven both from inside and outside the field. International guideline developers  
40  
41 483 require more primary research for this population, and impetus from clinicians and  
42  
43 484 scientists to build a better evidence base using robust data from randomised controlled  
44  
45 485 trials and long-term observational cohort studies, especially regarding chronic diseases,  
46  
47 486 health behaviours, substance use, screening and how interventions (e.g. hormones) might  
48  
49 487 impact on long-term health (e.g. risk of cardiovascular and thromboembolic disease).  
50  
51  
52  
53  
54  
55  
56  
57  
58  
59

1  
2  
3 488 Mortality and QoL data are required to address questions of clinical and cost-  
4  
5 489 effectiveness.

6  
7  
8 490 *Conclusion*

9  
10 491 Gender minority/trans health in current international CPGs seems limited to a focus on  
11  
12 492 HIV or transition-related interventions. WPATH SOCv7[30] is due for updating and this  
13  
14 493 study should be used positively to accelerate improvement. Future guideline developers  
15  
16 494 might better address the holistic healthcare needs of gender minority/trans people by  
17  
18 495 enhancing the evidence-base, upgrading the quality of CPGs and increasing the breadth  
19  
20 496 of health topics wherein this population is considered.  
21  
22

23  
24 497

25  
26 498 **Compliance with Ethical Standards**

27  
28 499 Contributorship statement: The authors were involved as follows: SB, IA, CM  
29  
30 500 conception. All authors (SD, DC, IA, MJ, SB, CM) were involved in design, execution,  
31  
32 501 analysis, drafting manuscript and critical discussion; all were responsible for revision and  
33  
34 502 final approval of the manuscript. All authors had full access to all the data (including  
35  
36 503 statistical reports and tables) in the study and can take responsibility for the integrity of  
37  
38 504 the data and the accuracy of the data analysis. CM acts as guarantor.

39  
40 505 Competing interests statement: The authors had no financial support for this work. There  
41  
42 506 were no financial relationships with any organisations that might have an interest in the  
43  
44 507 submitted work in the previous 3 years and there were no other relationships or activities  
45  
46 508 that could appear to have influenced the submitted work. All authors declare they have no  
47  
48 509 conflict of interests. SB, SD & DC's declarations can be found at  
49  
50 510 <http://www.whopaysthisdoctor.org>  
51  
52  
53  
54  
55  
56  
57  
58  
59  
60

1  
2  
3 511 Funding statement: This research received no specific grant from any funding agency in  
4  
5 512 the public, commercial or not-for-profit sectors.

6  
7 513 Data sharing statement: Additional data are available upon request

8  
9 514 Ethical approval and informed consent: Not applicable. The article is a systematic review.

10  
11 515 Dissemination plan: Not applicable, publication will be shared with stakeholders.

12  
13 516 Transparency declaration: CM affirms that the manuscript is an honest, accurate, and  
14  
15 517 transparent account of the study being reported; that no important aspects of the study  
16  
17 518 have been omitted; and that any discrepancies from the study as originally planned and  
18  
19 519 registered have been explained.

20  
21 520

## 22 521 **Licence Statement**

23  
24  
25  
26  
27 522 \* I, the Submitting Author has the right to grant and does grant on behalf of all authors of the  
28  
29 523 Work (as defined in the below author licence), an exclusive licence and/or a non-exclusive  
30  
31 524 licence for contributions from authors who are: i) UK Crown employees; ii) where BMJ has  
32  
33 525 agreed a CC-BY licence shall apply, and/or iii) in accordance with the terms applicable for  
34  
35 526 US Federal Government officers or employees acting as part of their official duties; on a  
36  
37 527 worldwide, perpetual, irrevocable, royalty-free basis to BMJ Publishing Group Ltd ("BMJ") its  
38  
39 528 licensees and where the relevant Journal is co-owned by BMJ to the co-owners of the  
40  
41 529 Journal, to publish the Work in BMJ Open and any other BMJ products and to exploit all  
42  
43 530 rights, as set out in our [licence](#).

44  
45 531  
46  
47 532 The Submitting Author accepts and understands that any supply made under these terms is  
48  
49 533 made by BMJ to the Submitting Author unless you are acting as an employee on behalf of  
50  
51 534 your employer or a postgraduate student of an affiliated institution which is paying any  
52  
53 535 applicable article publishing charge ("APC") for Open Access articles. Where the Submitting  
54  
55 536 Author wishes to make the Work available on an Open Access basis (and intends to pay the  
56  
57 537 relevant APC), the terms of reuse of such Open Access shall be governed by a Creative  
58  
59 538 Commons licence – details of these licences and which [Creative Commons](#) licence will apply  
60  
61 539 to this Work are set out in our licence referred to above.

62 540

## 63 541 **References**

64  
65 542 1 Institute of Medicine. *Clinical Practice Guidelines We Can Trust*. Washington,  
66  
67 543 D.C.: : The National Academies Press 2011. doi:10.17226/13058



- 1  
2  
3 544 2 Kredo T, Bernhardsson S, Machingaidze S, *et al.* Guide to clinical practice  
4  
5 545 guidelines: the current state of play. *Int J Qual Heal Care* 2016;**28**:122–8.  
6  
7 546 doi:10.1093/intqhc/mzv115  
8  
9  
10 547 3 Woolf SH, Grol R, Hutchinson A, *et al.* Clinical guidelines: Potential benefits,  
11  
12 548 limitations, and harms of clinical guidelines. *BMJ* 1999;**318**:527–30.  
13  
14 549 doi:10.1136/bmj.318.7182.527  
15  
16  
17 550 4 Guyatt GH, Oxman AD, Kunz R, *et al.* What is “quality of evidence” and why is it  
18  
19 551 important to clinicians? *BMJ* 2008;**336**:995–8. doi:10.1136/bmj.39490.551019.BE  
20  
21 552 5 Guyatt GH, Oxman AD, Vist GE, *et al.* GRADE: an emerging consensus on rating  
22  
23 553 quality of evidence and strength of recommendations. *BMJ* 2008;**336**:924–6.  
24  
25 554 doi:10.1136/bmj.39489.470347.AD  
26  
27  
28 555 6 Guyatt G, Oxman AD, Akl EA, *et al.* GRADE guidelines: 1. Introduction—  
29  
30 556 GRADE evidence profiles and summary of findings tables. *J Clin Epidemiol*  
31  
32 557 2011;**64**:383–94. doi:10.1016/j.jclinepi.2010.04.026  
33  
34  
35 558 7 Siemieniuk R, Guyatt G. What is GRADE? *BMJ Best Pract.*  
36  
37 559 <https://bestpractice.bmj.com/info/toolkit/learn-ebm/what-is-grade/> (accessed 23  
38  
39 560 Nov 2020).  
40  
41  
42 561 8 GRADE Working Group. GRADE Publications.  
43  
44 562 2020.<https://www.gradeworkinggroup.org/> (accessed 15 Aug 2020).  
45  
46  
47 563 9 Siemieniuk R. *Rapid Recommendations: Improving the efficiency and*  
48  
49 564 *trustworthiness of systematic reviews and guidelines.*  
50  
51 565 2020.<http://hdl.handle.net/11375/25540>  
52  
53  
54 566 10 Brouwers MC, Kho ME, Browman GP, *et al.* AGREE II: advancing guideline

- 1  
2  
3 567 development, reporting and evaluation in health care. *Can Med Assoc J*  
4  
5 568 2010;**182**:E839–42. doi:10.1503/cmaj.090449  
6  
7  
8 569 11 AGREE Next Steps Consortium. The AGREE II Instrument [Electronic version].  
9  
10 570 2017.<http://www.agreetrust.org> (accessed 14 Jul 2020).  
11  
12 571 12 Development and validation of an international appraisal instrument for assessing  
13  
14 572 the quality of clinical practice guidelines: the AGREE project. *Qual Saf Heal Care*  
15  
16 573 2003;**12**:18–23. doi:10.1136/qhc.12.1.18  
17  
18  
19 574 13 Trevisiol C, Cinquini M, Fabricio ASC, *et al.* Insufficient uptake of systematic  
20  
21 575 search methods in oncological clinical practice guideline: a systematic review.  
22  
23 576 *BMC Med Res Methodol* 2019;**19**:180. doi:10.1186/s12874-019-0818-5  
24  
25  
26 577 14 Plöderl M, Hengartner MP. Guidelines for the pharmacological acute treatment of  
27  
28 578 major depression: conflicts with current evidence as demonstrated with the  
29  
30 579 German S3-guidelines. *BMC Psychiatry* 2019;**19**:265. doi:10.1186/s12888-019-  
31  
32 580 2230-4  
33  
34  
35 581 15 Maes-Carballo M, Mignini L, Martín-Díaz M, *et al.* Quality and reporting of  
36  
37 582 clinical guidelines for breast cancer treatment: A systematic review. *The Breast*  
38  
39 583 2020;**53**:201–11. doi:10.1016/j.breast.2020.07.011  
40  
41  
42 584 16 WHO. WHO/Europe brief – transgender health in the context of ICD-11.  
43  
44 585 <https://www.euro.who.int/en/health-topics/health-determinants/gender/gender->  
45  
46 586 [definitions/whoeurope-brief-transgender-health-in-the-context-of-icd-11](https://www.euro.who.int/en/health-topics/health-determinants/gender/gender-definitions/whoeurope-brief-transgender-health-in-the-context-of-icd-11) (accessed  
47  
48 587 16 Jul 2020).  
49  
50  
51 588 17 Butler G, Graaf N De, Wren B, *et al.* Assessment and support of children and  
52  
53 589 adolescents with gender dysphoria. *Arch Dis Child* 2018;**103**:631–6.  
54  
55  
56  
57  
58  
59  
60

- 1  
2  
3 590 doi:10.1136/archdischild-2018-314992  
4  
5 591 18 Kaltiala-Heino R, Bergman H, Työlajärvi M, *et al.* Gender dysphoria in  
6  
7 592 adolescence: current perspectives. *Adolesc Health Med Ther* 2018;**9**:31–41.  
8  
9 593 doi:10.2147/AHMT.S135432  
10  
11 594 19 Freitas LD, Léda-Rêgo G, Bezerra-Filho S, *et al.* Psychiatric disorders in  
12  
13 595 individuals diagnosed with gender dysphoria: A systematic review. *Psychiatry*  
14  
15 596 *Clin Neurosci* 2020;**74**:99–104. doi:10.1111/pcn.12947  
16  
17 597 20 Connolly D, Davies E, Lynskey M, *et al.* Comparing intentions to reduce  
18  
19 598 substance use and willingness to seek help among transgender and cisgender  
20  
21 599 participants from the Global Drug Survey. *J Subst Abuse Treat* 2020;**112**:86–91.  
22  
23 600 doi:10.1016/j.jsat.2020.03.001  
24  
25 601 21 Clements-Nolle K, Marx R, Katz M. Attempted Suicide Among Transgender  
26  
27 602 Persons. *J Homosex* 2006;**51**:53–69. doi:10.1300/J082v51n03\_04  
28  
29 603 22 Catelan RF, Costa AB, de Macedo Lisboa CS. Psychological Interventions for  
30  
31 604 Transgender Persons: A Scoping Review. *Int J Sex Heal* 2017;**29**:325–37.  
32  
33 605 doi:10.1080/19317611.2017.1360432  
34  
35 606 23 Glynn TR, van den Berg JJ. A Systematic Review of Interventions to Reduce  
36  
37 607 Problematic Substance Use Among Transgender Individuals: A Call to Action.  
38  
39 608 *Transgender Heal* 2017;**2**:45–59. doi:10.1089/trgh.2016.0037  
40  
41 609 24 Poteat T, Reisner SL, Radix A. HIV epidemics among transgender women. *Curr*  
42  
43 610 *Opin HIV AIDS* 2014;**9**:168–73. doi:10.1097/COH.0000000000000030  
44  
45 611 25 Winter S, Diamond M, Green J, *et al.* Transgender people: health at the margins of  
46  
47 612 society. *Lancet* 2016;**388**:390–400. doi:10.1016/S0140-6736(16)00683-8  
48  
49  
50  
51  
52  
53  
54  
55  
56  
57  
58  
59  
60

- 1  
2  
3 613 26 James SE, Herman JL, Rankin S, *et al.* *The report of the US Transgender Survey*  
4  
5 614 2015. Washington, D.C.: : National Center for Healthcare Equality 2016.  
6  
7 615 <https://www.transequality.org/sites/default/files/docs/USTS-Full-Report->  
8  
9 616 FINAL.PDF
- 10  
11  
12 617 27 Bockting WO, Miner MH, Romine RES, *et al.* Stigma, Mental Health, and  
13  
14 618 Resilience in an Online Sample of the US Transgender Population. *Am J Public*  
15  
16 619 *Health* 2013;**103**:943–51. doi:10.2105/AJPH.2013.301241
- 17  
18  
19 620 28 OHCHR. Discrimination and violence against individuals based on their sexual  
20  
21 621 orientation and gender identity. 2015.  
22  
23 622 [https://ap.ohchr.org/documents/dpage\\_e.aspx?si=A/HRC/29/23](https://ap.ohchr.org/documents/dpage_e.aspx?si=A/HRC/29/23)
- 24  
25  
26 623 29 Reisner SL, Poteat T, Keatley J, *et al.* Global health burden and needs of  
27  
28 624 transgender populations: a review. *Lancet* 2016;**388**:412–36. doi:10.1016/S0140-  
29  
30 625 6736(16)00684-X
- 31  
32  
33 626 30 Coleman E, Bockting W, Botzer M, *et al.* Standards of Care for the Health of  
34  
35 627 Transsexual, Transgender, and Gender-Nonconforming People, Version 7. *Int J*  
36  
37 628 *Transgenderism* 2012;**13**:165–232. doi:10.1080/15532739.2011.700873
- 38  
39  
40 629 31 Wylie K, Knudson G, Khan SI, *et al.* Serving transgender people: clinical care  
41  
42 630 considerations and service delivery models in transgender health. *Lancet*  
43  
44 631 2016;**388**:401–11. doi:10.1016/S0140-6736(16)00682-6
- 45  
46  
47 632 32 Dahl M, Feldman JL, Goldberg J, *et al.* Endocrine Therapy for Transgender Adults  
48  
49 633 in British Columbia: Suggested Guidelines Physical Aspects of Transgender  
50  
51 634 Endocrine Therapy. 2015.
- 52  
53  
54 635 33 Oliphant J, Veale J, Macdonald J, *et al.* Guidelines for Gender Affirming  
55  
56  
57  
58  
59  
60

- 1  
2  
3 636 Healthcare for Gender Diverse and Transgender Children, Young People and  
4  
5 637 Adults in Aotearoa, New Zealand. *N Z Med J* 2018;**131**:86–  
6  
7 638 96.<http://www.ncbi.nlm.nih.gov/pubmed/30543615>  
8  
9  
10 639 34 Psychological Society of South Africa. *Practice Guidelines For Psychology*  
11  
12 640 *Professionals Working With Sexually And Gender-Diverse People*. Johannesburg: :  
13  
14 641 Psychological Society of South Africa 2017. [https://www.psyssa.com/wp-](https://www.psyssa.com/wp-content/uploads/2018/04/PsySSA-Diversity-Competence-Practice-Guidelines-PRINT-singlesided.pdf)  
15  
16 642 [content/uploads/2018/04/PsySSA-Diversity-Competence-Practice-Guidelines-](https://www.psyssa.com/wp-content/uploads/2018/04/PsySSA-Diversity-Competence-Practice-Guidelines-PRINT-singlesided.pdf)  
17  
18 643 [PRINT-singlesided.pdf](https://www.psyssa.com/wp-content/uploads/2018/04/PsySSA-Diversity-Competence-Practice-Guidelines-PRINT-singlesided.pdf)  
19  
20  
21 644 35 UCSF Transgender Care. *Guidelines for the Primary and Gender-Affirming Care*  
22  
23 645 *of Transgender and Gender Nonbinary People*. 2nd ed. San Francisco: :  
24  
25 646 Department of Family and Community Medicine University of California San  
26  
27 647 Francisco 2016. <https://transcare.ucsf.edu/guidelines>  
28  
29  
30  
31 648 36 Deutsch M, Radix A, Reisner S. What’s in a Guideline? Developing Collaborative  
32  
33 649 and Sound Research Designs that Substantiate Best Practice Recommendations for  
34  
35 650 Transgender Health Care. *AMA J Ethics* 2016;**18**:1098–106.  
36  
37 651 [doi:10.1001/journalofethics.2016.18.11.stas1-1611](https://doi.org/10.1001/journalofethics.2016.18.11.stas1-1611)  
38  
39  
40 652 37 Gender Identity Research and Education Society. What We Do.  
41  
42 653 <https://www.gires.org.uk/what-we-do/improving-medical-care/> (accessed 18 Nov  
43  
44 654 2020).  
45  
46  
47 655 38 Ahmad S, Barrett J, Beaini AY, *et al*. Gender dysphoria services: a guide for  
48  
49 656 general practitioners and other healthcare staff. *Sex Relatsh Ther* 2013;**28**:172–85.  
50  
51 657 [doi:10.1080/14681994.2013.808884](https://doi.org/10.1080/14681994.2013.808884)  
52  
53  
54 658 39 Wylie K, Barrett J, Besser M, *et al*. Good Practice Guidelines for the Assessment  
55  
56  
57  
58  
59  
60

- 1  
2  
3 659 and Treatment of Adults with Gender Dysphoria. *Sex Relatsh Ther* 2014;**29**:154–  
4  
5 660 214. doi:10.1080/14681994.2014.883353  
6  
7  
8 661 40 RCGP. The role of the GP in caring for gender-questioning and transgender  
9  
10 662 patients. RCGP Position Statement. 2019.<https://www.rcgp.org.uk/->  
11  
12 663 [/media/Files/Policy/A-Z-policy/2019/RCGP-position-statement-providing-care-](https://www.rcgp.org.uk/-/media/Files/Policy/A-Z-policy/2019/RCGP-position-statement-providing-care-for-gender-transgender-patients-june-2019.ashx?la=en)  
13  
14 664 [for-gender-transgender-patients-june-2019.ashx?la=en](https://www.rcgp.org.uk/-/media/Files/Policy/A-Z-policy/2019/RCGP-position-statement-providing-care-for-gender-transgender-patients-june-2019.ashx?la=en) (accessed 23 Nov 2020).  
15  
16  
17 665 41 Hoffmann-Eßer W, Siering U, Neugebauer EAM, *et al*. Guideline appraisal with  
18  
19 666 AGREE II: Systematic review of the current evidence on how users handle the 2  
20  
21 667 overall assessments. *PLoS One* 2017;**12**:e0174831.  
22  
23 668 doi:10.1371/journal.pone.0174831  
24  
25  
26 669 42 Siering U, Eikermann M, Hausner E, *et al*. Appraisal Tools for Clinical Practice  
27  
28 670 Guidelines: A Systematic Review. *PLoS One* 2013;**8**:e82915.  
29  
30 671 doi:10.1371/journal.pone.0082915  
31  
32  
33 672 43 McGowan J, Sampson M, Salzwedel DM, *et al*. PRESS Peer Review of Electronic  
34  
35 673 Search Strategies: 2015 Guideline Statement. *J Clin Epidemiol* 2016;**75**:40–6.  
36  
37 674 doi:10.1016/j.jclinepi.2016.01.021  
38  
39  
40 675 44 Scottish Intercollegiate Guidelines Network. What Are Guidelines? Sign.  
41  
42 676 <https://www.sign.ac.uk/what-are-guidelines> (accessed 16 Jul 2020).  
43  
44  
45 677 45 National Institute for Health and Care Excellence. How NICE clinical guidelines  
46  
47 678 are developed: an overview for stakeholders, the public and the NHS. NICE. 2012.  
48  
49 679 46 Institute of Medicine. *Guidelines for Clinical Practice: From Development to Use*.  
50  
51 680 Washington, D.C.: : The National Academies Press 1992. doi:10.17226/1863  
52  
53  
54 681 47 Moher D, Liberati A, Tetzlaff J, *et al*. Preferred Reporting Items for Systematic  
55  
56  
57  
58  
59

- 1  
2  
3 682       Reviews and Meta-Analyses: The PRISMA Statement. *PLoS Med*  
4  
5 683       2009;**6**:e1000097. doi:10.1371/journal.pmed.1000097  
6  
7  
8 684    48    WHO. *Prevention and treatment of HIV and other sexually transmitted infections*  
9  
10 685       *among men who have sex with men and transgender people: recommendations for*  
11  
12 686       *a public health approach*. Geneva: : World Health Organization 2011.  
13  
14 687       [https://www.who.int/hiv/pub/guidelines/msm\\_guidelines2011/en/](https://www.who.int/hiv/pub/guidelines/msm_guidelines2011/en/)  
15  
16  
17 688    49    WHO. *Guidance on oral pre-exposure prophylaxis (PrEP) for serodiscordant*  
18  
19 689       *couples, men and transgender women who have sex with men at high risk of HIV:*  
20  
21 690       *recommendations for use in the context of demonstration projects*. Geneva: :  
22  
23 691       World Health Organization 2012. [https://www.who.int/hiv/pub/guidance\\_prep/en/](https://www.who.int/hiv/pub/guidance_prep/en/)  
24  
25  
26 692    50    WHO. *Consolidated guidelines on HIV prevention, diagnosis, treatment and care*  
27  
28 693       *for key populations, 2016 update*. 2016.  
29  
30 694       <http://www.who.int/hiv/pub/guidelines/keypopulations/>  
31  
32  
33 695    51    Davies S, Papp VG, Antoni C. Voice and Communication Change for Gender  
34  
35 696       Nonconforming Individuals: Giving Voice to the Person Inside. *Int J*  
36  
37 697       *Transgenderism* 2015;**16**:117–59. doi:10.1080/15532739.2015.1075931  
38  
39  
40 698    52    Gilligan T, Coyle N, Frankel RM, *et al*. Patient-Clinician Communication:  
41  
42 699       American Society of Clinical Oncology Consensus Guideline. *J Clin Oncol*  
43  
44 700       2017;**35**:3618–32. doi:10.1200/JCO.2017.75.2311  
45  
46  
47 701    53    Hembree WC, Cohen-Kettenis PT, Gooren L, *et al*. Endocrine treatment of gender-  
48  
49 702       dysphoric/ gender-incongruent persons: An endocrine society\*clinical practice  
50  
51 703       guideline. *J Clin Endocrinol Metab* 2017;**102**:3869–903. doi:10.1210/jc.2017-  
52  
53 704       01658  
54  
55  
56  
57  
58  
59

- 1  
2  
3 705 54 IAPAC Guidelines for Optimizing the HIV Care Continuum for Adults and  
4  
5 706 Adolescents. *J Int Assoc Provid AIDS Care* 2015;**14**:S3–34.  
6  
7 707 doi:10.1177/2325957415613442  
8  
9  
10 708 55 T’Sjoen G, Arcelus J, De Vries ALC, *et al.* European Society for Sexual Medicine  
11  
12 709 Position Statement “Assessment and Hormonal Management in Adolescent and  
13  
14 710 Adult Trans People, With Attention for Sexual Function and Satisfaction”. *J Sex*  
15  
16 711 *Med* 2020;**17**:570–84. doi:10.1016/j.jsxm.2020.01.012  
17  
18  
19 712 56 Ralph D, Gonzalez-Cadavid N, Mirone V, *et al.* Trauma, Gender Reassignment,  
20  
21 713 and Penile Augmentation. *J Sex Med* 2010;**7**:1657–67. doi:10.1111/j.1743-  
22  
23 714 6109.2010.01781.x  
24  
25  
26 715 57 Strang JF, Meagher H, Kenworthy L, *et al.* Initial Clinical Guidelines for Co-  
27  
28 716 Occurring Autism Spectrum Disorder and Gender Dysphoria or Incongruence in  
29  
30 717 Adolescents. *J Clin Child Adolesc Psychol* 2018;**47**:105–15.  
31  
32 718 doi:10.1080/15374416.2016.1228462  
33  
34  
35 719 58 ECDC. *European Centre for Disease Prevention and Control. Public health*  
36  
37 720 *guidance on HIV, hepatitis B and C testing in the EU/EEA: An integrated*  
38  
39 721 *approach*. Stockholm: 2018. doi:10.2900/79127  
40  
41  
42 722 59 Jungwirth, A; Diemer, T; Kopa, Z; Krausz, C; Minhas, S; Tournaye H. *EAU*  
43  
44 723 *Guidelines on Male Infertility*. European Association of Urology 2018.  
45  
46 724 <https://uroweb.org/guideline/male-infertility/>  
47  
48  
49 725 60 Thoreson N, Marks DH, Peebles JK, *et al.* Health Insurance Coverage of  
50  
51 726 Permanent Hair Removal in Transgender and Gender-Minority Patients. *JAMA*  
52  
53 727 *Dermatology* 2020;**156**:561. doi:10.1001/jamadermatol.2020.0480  
54  
55  
56  
57  
58  
59  
60



- 1  
2  
3 728 61 Solotke MT, Liu P, Dhruva SS, *et al.* Medicare Prescription Drug Plan Coverage  
4  
5 729 of Hormone Therapies Used by Transgender Individuals. *LGBT Heal* 2020;**7**:137–  
6  
7 730 45. doi:10.1089/lgbt.2019.0306  
8  
9  
10 731 62 Fraser L, Knudson G. Past and Future Challenges Associated with Standards of  
11  
12 732 Care for Gender Transitioning Clients. *Psychiatr Clin North Am* 2017;**40**:15–27.  
13  
14 733 doi:10.1016/j.psc.2016.10.012  
15  
16  
17 734 63 Shuster S. Uncertain Expertise and the Limitations of Clinical Guidelines in  
18  
19 735 Transgender Healthcare. *J Health Soc Behav* 2016;**57**:319–32.  
20  
21 736 doi:10.1177/0022146516660343  
22  
23  
24 737 64 Velho I, Figuera TM, Ziegelmann PK, *et al.* Effects of testosterone therapy on  
25  
26 738 BMI, blood pressure, and laboratory profile of transgender men: a systematic  
27  
28 739 review. *Andrology* 2017;**5**:881–8. doi:10.1111/andr.12382  
29  
30  
31 740 65 Maraka S, Singh Ospina N, Rodriguez-Gutierrez R, *et al.* Sex Steroids and  
32  
33 741 Cardiovascular Outcomes in Transgender Individuals: A Systematic Review and  
34  
35 742 Meta-Analysis. *J Clin Endocrinol Metab* 2017;**102**:3914–23. doi:10.1210/jc.2017-  
36  
37 743 01643  
38  
39  
40 744 66 Connolly D, Hughes X, Berner A. Barriers and facilitators to cervical cancer  
41  
42 745 screening among transgender men and non-binary people with a cervix: A  
43  
44 746 systematic narrative review. *Prev Med (Baltim)* 2020;**135**:106071.  
45  
46 747 doi:10.1016/j.yjmed.2020.106071  
47  
48  
49 748 67 Lei X, Liu F, Luo S, *et al.* Evaluation of guidelines regarding surgical treatment of  
50  
51 749 breast cancer using the AGREE Instrument: A systematic review. *BMJ Open*  
52  
53 750 2017;**7**:1–11. doi:10.1136/bmjopen-2016-014883  
54  
55  
56  
57  
58  
59  
60

- 1  
2  
3 751 68 Bhatt M, Nahari A, Wang P-W, *et al.* The quality of clinical practice guidelines for  
4  
5 752 management of pediatric type 2 diabetes mellitus: a systematic review using the  
6  
7 753 AGREE II instrument. *Syst Rev* 2018;**7**:193. doi:10.1186/s13643-018-0843-1  
8  
9  
10 754 69 Bazzano AN, Green E, Madison A, *et al.* Assessment of the quality and content of  
11  
12 755 national and international guidelines on hypertensive disorders of pregnancy using  
13  
14 756 the AGREE II instrument. *BMJ Open* 2016;**6**:e009189. doi:10.1136/bmjopen-  
15  
16 757 2015-009189  
17  
18  
19 758 70 MacQueen G, Santaguida P, Keshavarz H, *et al.* Systematic Review of Clinical  
20  
21 759 Practice Guidelines for Failed Antidepressant Treatment Response in Major  
22  
23 760 Depressive Disorder, Dysthymia, and Subthreshold Depression in Adults. *Can J*  
24  
25 761 *Psychiatry* 2017;**62**:11–23. doi:10.1177/0706743716664885  
26  
27  
28 762 71 Alonso-Coello P, Irfan A, Sola I, *et al.* The quality of clinical practice guidelines  
29  
30 763 over the last two decades: a systematic review of guideline appraisal studies. *BMJ*  
31  
32 764 *Qual Saf* 2010;**19**:e58–e58. doi:10.1136/qshc.2010.042077  
33  
34  
35 765 72 Bewley S. What inhibits obstetricians implementing reliable guidelines? *BJOG An*  
36  
37 766 *Int J Obstet Gynaecol* 2020;**127**:798. doi:10.1111/1471-0528.16177  
38  
39  
40 767 73 Grilli R, Magrini N, Penna A, *et al.* Practice guidelines developed by specialty  
41  
42 768 societies: the need for a critical appraisal. *Lancet* 2000;**355**:103–6.  
43  
44 769 doi:10.1016/S0140-6736(99)02171-6  
45  
46  
47 770 74 Welch VA, Akl EA, Guyatt G, *et al.* GRADE equity guidelines 1: considering  
48  
49 771 health equity in GRADE guideline development: introduction and rationale. *J Clin*  
50  
51 772 *Epidemiol* 2017;**90**:59–67. doi:10.1016/j.jclinepi.2017.01.014  
52  
53  
54 773 75 Akl EA, Welch V, Pottie K, *et al.* GRADE equity guidelines 2: considering health  
55  
56  
57  
58  
59  
60

- 1  
2  
3 774 equity in GRADE guideline development: equity extension of the guideline  
4  
5 775 development checklist. *J Clin Epidemiol* 2017;**90**:68–75.  
6  
7  
8 776 doi:10.1016/j.jclinepi.2017.01.017  
9  
10 777 76 Welch VA, Akl EA, Pottie K, *et al.* GRADE equity guidelines 3: considering  
11  
12 778 health equity in GRADE guideline development: rating the certainty of  
13  
14 779 synthesized evidence. *J Clin Epidemiol* 2017;**90**:76–83.  
15  
16  
17 780 doi:10.1016/j.jclinepi.2017.01.015  
18  
19 781 77 Pottie K, Welch V, Morton R, *et al.* GRADE equity guidelines 4: considering  
20  
21 782 health equity in GRADE guideline development: evidence to decision process. *J*  
22  
23 783 *Clin Epidemiol* 2017;**90**:84–91. doi:10.1016/j.jclinepi.2017.08.001  
24  
25  
26 784 78 Haupt C, Henke M, Kutschmar A, *et al.* Antiandrogen or estradiol treatment or  
27  
28 785 both during hormone therapy in transitioning transgender women. *Cochrane*  
29  
30 786 *Database Syst Rev* Published Online First: 28 November 2020.  
31  
32  
33 787 doi:10.1002/14651858.CD013138.pub2  
34  
35 788 79 Ioannidis JPA. Professional Societies Should Abstain From Authorship of  
36  
37 789 Guidelines and Disease Definition Statements. *Circ Cardiovasc Qual Outcomes*  
38  
39 790 2018;**11**. doi:10.1161/CIRCOUTCOMES.118.004889  
40  
41  
42 791 80 Ioannidis JPA. Guidelines Do Not Entangle Practitioners With Unavoidable  
43  
44 792 Conflicts as Authors, and When There Is No Evidence, Just Say So. *Circ*  
45  
46 793 *Cardiovasc Qual Outcomes* 2018;**11**. doi:10.1161/CIRCOUTCOMES.118.005205  
47  
48  
49 794 81 James Lind Alliance. About Priority Setting Partnerships.  
50  
51 795 <http://www.jla.nihr.ac.uk/about-the-james-lind-alliance/about-psps.htm> (accessed 8  
52  
53 796 Jul 2020).

- 1  
2  
3 797 82 Thomas J, Kneale D, McKenzie J, *et al.* Chapter 2: Determining the scope of the  
4  
5 798 review and the questions it will address. In: Higgins J, Thomas J, Chandler J, *et al.*,  
6  
7 799 eds. *Cochrane Handbook for Systematic Reviews of Interventions*. Cochrane 2020.  
8  
9 800 [www.training.cochrane.org/handbook](http://www.training.cochrane.org/handbook) (accessed 11 Nov 2020).  
10  
11  
12 801 83 Royal College of Physicians. Gender Identity Healthcare Credentials (GIH). RCP  
13  
14 802 London. [https://www.rcplondon.ac.uk/education-practice/courses/gender-identity-](https://www.rcplondon.ac.uk/education-practice/courses/gender-identity-healthcare-credentials-gih)  
15  
16 803 [healthcare-credentials-gih](https://www.rcplondon.ac.uk/education-practice/courses/gender-identity-healthcare-credentials-gih) (accessed 8 Jul 2020).  
17  
18  
19 804 84 Schünemann HJ, Wiercioch W, Brozek J, *et al.* GRADE Evidence to Decision  
20  
21 805 (EtD) frameworks for adoption, adaptation, and de novo development of  
22  
23 806 trustworthy recommendations: GRADE-ADOLOPMENT. *J Clin Epidemiol*  
24  
25 807 2017;**81**:101–10. doi:10.1016/j.jclinepi.2016.09.009  
26  
27  
28 808 85 Dunford C, Gresty H, Takhar M, *et al.* Transgender and adolescence: Is online  
29  
30 809 information accurate or mis-leading? *Eur Urol Suppl* 2019;**18**:e1782.  
31  
32 810 doi:10.1016/S1569-9056(19)31291-6  
33  
34  
35 811 86 Harding Center for Risk Literacy. Fact boxes.  
36  
37 812 <https://www.hardingcenter.de/en/fact-boxes> (accessed 8 Jul 2020).  
38  
39  
40 813 87 Winton Centre for Risk and Evidence Communication.  
41  
42 814 <https://wintoncentre.maths.cam.ac.uk/> (accessed 8 Jul 2020).  
43  
44  
45 815

## 816 Legend/Key for Figure

817 Figure 1. PRISMA flow diagram

818 **Key:** CPG, clinical practice guideline; PRISMA, Preferred Reporting Items for Systematic Reviews and Meta-Analyses

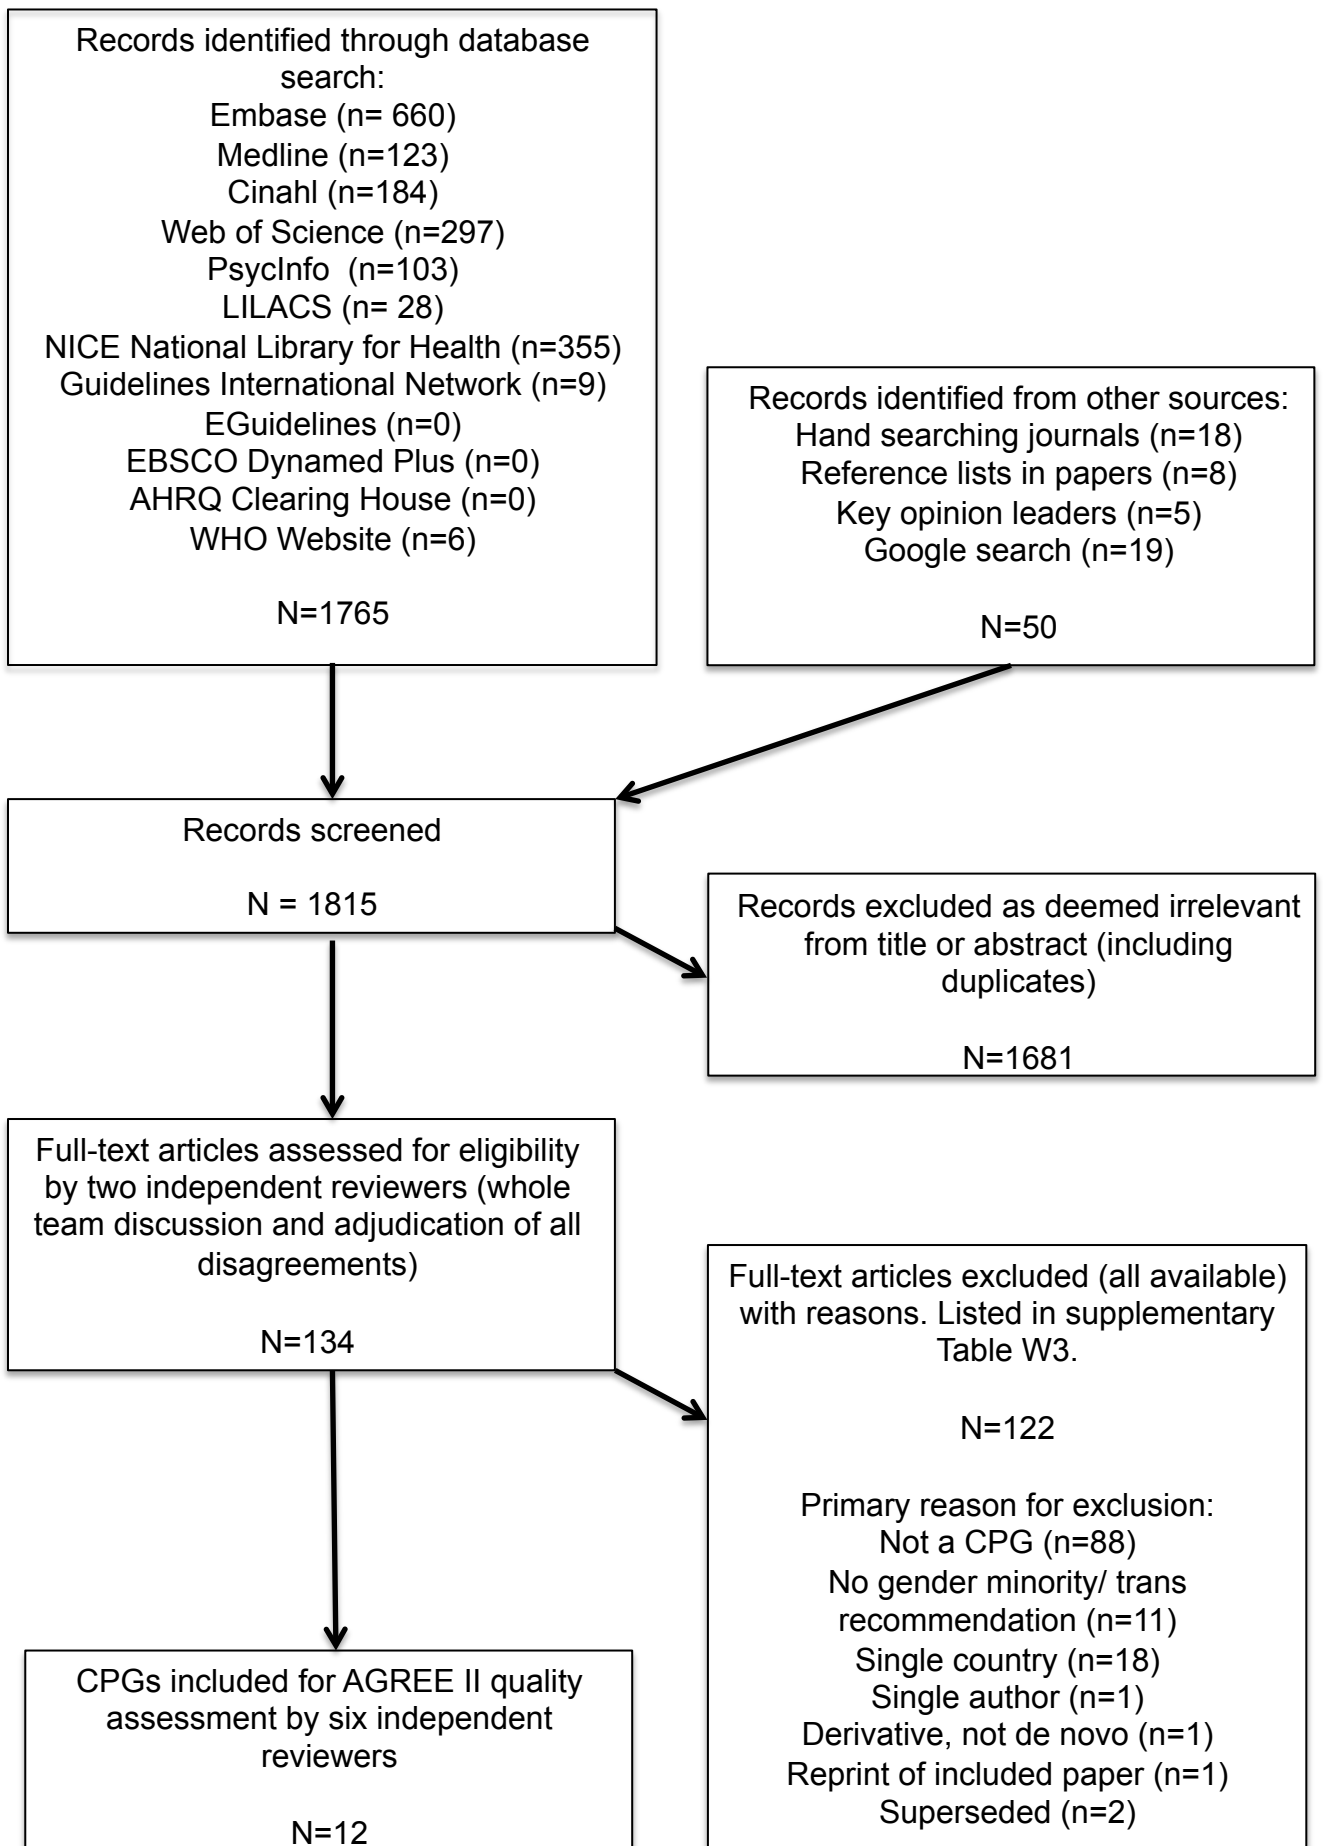

1  
2  
3 **International Clinical Practice Guidelines for Gender Minority/Trans People: Systematic Review and Quality Assessment**  
4  
5  
6  
7

8 **Supplementary/ Web/ Appendices**  
9

10 W1. Search terms used and search strategy for at least one database  
11

12 W2. Stakeholder and review team priority scoring exercise  
13

14 W3. Full text excluded studies with reasons for exclusion  
15

16  
17 W4. Extracted sentences relating to mortality or quality of life with associated references from Clinical Practice Guidelines  
18

19 W5. Extracted key recommendations from Clinical Practice Guidelines  
20  
21  
22  
23  
24  
25  
26  
27  
28  
29  
30  
31  
32  
33  
34  
35  
36  
37  
38  
39  
40  
41  
42  
43  
44  
45  
46  
47

## W1: Literature searching – Databases searched and search terms used

### Embase <1974 to 2019 July 29>

- 1 transgender.mp. or transgender/ (7297)
- 2 transsexual.mp. (2070)
- 3 gender identity/ or gender non-conforming.mp. (15929)
- 4 non-binary.mp. (219)
- 5 gender minority.mp. or "sexual and gender minority"/ (1582)
- 6 transman.mp. (20)
- 7 transwoman.mp. (25)
- 8 gender dysphoria.mp. or gender dysphoria/ (1887)
- 9 gender diversity.mp. (257)
- 10 1 or 2 or 3 or 4 or 5 or 6 or 7 or 8 or 9 (24836)
- 11 practice guideline/ or clinical guideline.mp. (387400)
- 12 10 and 11 (511)
- 13 limit 12 to yr="2008 - 2020" (460)

### Ovid MEDLINE(R) ALL <1946 to July 29, 2019>

- 1 gender diversity.mp. (225)
- 2 gender dysphoria.mp. or Transsexualism/ or Gender Dysphoria/ or Gender Identity/ (20817)
- 3 gender minority.mp. or "Sexual and Gender Minorities"/ (2406)
- 4 Transgender Persons/ or gender non-conforming.mp. (2429)
- 5 non-binary.mp. (164)
- 6 transgender.mp. (5364)
- 7 transman.mp. (8)
- 8 transwoman.mp. (13)
- 9 Transsexualism/ or transsexual.mp. (3855)
- 10 1 or 2 or 3 or 4 or 5 or 6 or 7 or 8 or 9 (26619)
- 11 Practice Guidelines as Topic/ or clinical guideline.mp. (112006)
- 12 10 and 11 (103)

### Web of Science

Search terms: (TOPIC: (((((transgender OR gender dysphoria) OR transsexual) OR gender identity) OR transman) OR transwomen) AND TOPIC: (clinical guideline OR practice guideline)) [271 results]

(TOPIC: (gender incongruence) AND TOPIC: (clinical guideline OR practice guideline))

### NICE Evidence

1  
2  
3  
4  
5  
6  
7  
8  
9  
10  
11  
12  
13  
14  
15  
16  
17  
18  
19  
20  
21  
22  
23  
24  
25  
26  
27  
28  
29  
30  
31  
32  
33  
34  
35  
36  
37  
38  
39  
40  
41  
42  
43  
44  
45  
46  
47

Search terms: Transgender, gender dysphoria

**CINAHL**

(transgender or transsexual or transsexual or gender variant or gender non-conforming or transmen or transwomen or gender dysphoria or gender identity) AND (clinical guideline or practice guideline)

**PSYCInfo**

(transgender or transsexual or transsexual or gender variant or gender non-conforming or transmen or transwomen or gender dysphoria or gender identity) AND (clinical guideline or practice guideline)

**AHRQ National Guidelines Clearing House**

Search terms: trans, gender identity. Was stopped in 2018 – no update searches available

**eGuidelines**

Search terms: trans, gender identity

**Guidelines International Network**

Search terms: Transgender, gender dysphoria, gender identity

**WHO website** – not searchable on so used Google instead

**Google Search terms:** WHO transgender guidelines - First 100 hits examined

Update: WHO transgender guidelines 2020

**LILACS**

Search term: gender dysphoria

For peer review only



**W2: Stakeholder prioritisation exercise and comparison with research team**

| Domains                  | Stakeholders (n=19) # |          |       |       |         |               | Reviewers (n=6) |    |       |     |    |          |
|--------------------------|-----------------------|----------|-------|-------|---------|---------------|-----------------|----|-------|-----|----|----------|
|                          | 1 highest             | 2        | 3     | 4     | 5       | 6 lowest      | 1 highest       | 2  | 3     | 4   | 5  | 6 lowest |
| Scope and purpose        | ***                   | ***** *  | *     | **    | ***** * |               | *               | *  | ***** | **  |    | *        |
| Stakeholder Involvement  | ***** ****            | *        | ***   | **    | **      | *             |                 |    | *     | *   | ** | *        |
| Rigour of development    | *                     | *        | ***** | ***** | ****    | **            | *****           | *  |       |     |    |          |
| Clarity and presentation | ***                   | ***      | ***** | ***   | *       | ***           |                 | *  |       | *** | *  |          |
| Applicability            | *                     | ***** ** | **    | ***** | ***     |               |                 | *  |       |     | *  | ***      |
| Editorial independence   | **                    | *        | **    | *     |         | ***** ***** * |                 | ** |       |     | ** | *        |

**Key:** # Numbers do not all add up to 19 as one stakeholder only gave first two preferences; \* stakeholder or reviewer preference vote. Green shows highest priority and red shows lowest priority

### W3: Excluded full studies with reasons for exclusion

| Full Citation (n=122)                                                                                                                                                                                                                                                                                           | Reason(s) for exclusion                                   |
|-----------------------------------------------------------------------------------------------------------------------------------------------------------------------------------------------------------------------------------------------------------------------------------------------------------------|-----------------------------------------------------------|
| Ackerley CG, Poteat T, Kelley CF. Human Immunodeficiency Virus in Transgender Persons. <i>Endocrinol Metab Clin North Am</i> 2019; <b>48</b> :453–64. doi:10.1016/j.ecl.2019.02.007                                                                                                                             | Not a CPG. Single country.                                |
| Adams N, Pearce R, Veale J, <i>et al.</i> Guidance and Ethical Considerations for Undertaking Transgender Health Research and Institutional Review Boards Adjudicating this Research. <i>Transgender Heal</i> 2017; <b>2</b> :165–75. doi:10.1089/trgh.2017.0012                                                | Not a CPG.                                                |
| ADFAM. Including diverse families: good practice guidelines. 2010. <a href="https://adfam.org.uk/files/docs/idf_toolkit.pdf">https://adfam.org.uk/files/docs/idf_toolkit.pdf</a>                                                                                                                                | No TG specific recommendation. Single country.            |
| Akl EA, Kennedy C, Konda K, <i>et al.</i> Using GRADE methodology for the development of public health guidelines for the prevention and treatment of HIV and other STIs among men who have sex with men and transgender people. <i>BMC Public Health</i> 2012; <b>12</b> :386. doi:10.1186/1471-2458-12-386    | Not a CPG.                                                |
| American College of Obstetricians and Gynecologists, Sokkary N, Gomez-Lobo V. Committee Opinion No. 685: Care for Transgender Adolescents. <i>Obstet Gynecol</i> 2017; <b>129</b> :e11–6. doi:10.1097/AOG.0000000000001861                                                                                      | Not a CPG. Single country.                                |
| American Psychological Assoc. Guidelines for psychological practice with transgender and gender nonconforming people. <i>Am Psychol</i> 2015; <b>70</b> :832–64. doi:10.1037/a0039906                                                                                                                           | Single country.                                           |
| American Psychological Association. Multicultural guidelines: An ecological approach to context, identity, and intersectionality, 2017. <i>Am Psychol Assoc</i> : 2017. <a href="http://www.apa.org/about/policy/multicultural-guidelines.pdf">http://www.apa.org/about/policy/multicultural-guidelines.pdf</a> | Single country.                                           |
| American Society for Reproductive Medicine, American College of Obstetricians and Gynecologists. Prepregnancy counseling: Committee Opinion No. 762. <i>Fertil Steril</i> 2019; <b>111</b> :32–42. doi:10.1016/j.fertnstert.2018.12.003                                                                         | Not a CPG. No TG specific recommendation. Single country. |
| Baggaley R, Armstrong A, Dodd Z, <i>et al.</i> Young key populations and HIV: A special emphasis and consideration in the new WHO Consolidated Guidelines on HIV Prevention, Diagnosis, Treatment and Care for Key Populations. <i>J Int AIDS Soc</i> 2015; <b>18</b> :85–8. doi:10.7448/IAS.18.2.19438         | Not a CPG.                                                |
| Barrett J. Gender Dysphoria in Adults. <i>BMJ Best Pract</i> . 2018. <a href="https://bestpractice.bmj.com/topics/en-gb/992">https://bestpractice.bmj.com/topics/en-gb/992</a>                                                                                                                                  | Not a CPG. Single author.                                 |
| Bekker L-G, Rebe K, Venter F, <i>et al.</i> Southern African guidelines on the safe use of pre-exposure prophylaxis in persons at risk of acquiring HIV-1 infection. <i>South Afr J HIV Med</i> 2016; <b>17</b> . doi:10.4102/sajhivmed.v17i1.455                                                               | Single country.                                           |
| Berli JU, Capitán L, Simon D, <i>et al.</i> Facial gender confirmation surgery—review of the literature and recommendations for Version 8 of the WPATH Standards of Care. <i>Int J Transgenderism</i> 2017; <b>18</b> :264–70. doi:10.1080/15532739.2017.1302862                                                | Not a CPG.                                                |
| Bhugra D, Gupta S, Schouler-Ocak M, <i>et al.</i> EPA Guidance Mental Health Care of Migrants. <i>Eur Psychiatry</i> 2014; <b>29</b> :107–15. doi:10.1016/j.eurpsy.2014.01.003                                                                                                                                  | Not a CPG. No TG specific recommendation.                 |
| Bonifacio JH, Maser C, Stadelman K, <i>et al.</i> Management of gender dysphoria in adolescents in primary care. <i>Can Med Assoc J</i> 2019; <b>191</b> :E69–75. doi:10.1503/cmaj.180672                                                                                                                       | Not a CPG. Single country.                                |
| Bonnington A, Dianat S, Kerns J, <i>et al.</i> Society of Family Planning clinical recommendations: Contraceptive counseling for transgender and gender diverse people who were female sex assigned at birth. <i>Contraception</i> Published Online First: 2020. doi:10.1016/j.contraception.2020.04.001        | Single country.                                           |
| Boroughs MS, Bedoya CA, O’Cleirigh C, <i>et al.</i> Toward Defining, Measuring, and Evaluating LGBT Cultural Competence for Psychologists. <i>Clin Psychol Sci Pract</i> 2015; <b>22</b> :151–71. doi:10.1111/cpsp.12098                                                                                        | Not a CPG. Single country.                                |
| Bourjeily G, Mehta S. Gender diversity in Obstetric Medicine. <i>Obstet Med</i> 2019; <b>12</b> :55–6. doi:10.1177/1753495X19851711                                                                                                                                                                             | Not a CPG.                                                |
| Brown B, Poteat T, Marg L, <i>et al.</i> Human Papillomavirus-Related Cancer Surveillance, Prevention, and Screening among Transgender Men and Women: Neglected Populations at High Risk. <i>LGBT Heal</i> 2017; <b>4</b> :315–9. doi:10.1089/lgbt.2016.0142                                                    | Not a CPG.                                                |
| Brown GR. Recommended revisions to the world professional association for transgender health’s standards of care section on medical care for incarcerated persons with gender identity disorder. <i>Int J Transgenderism</i> 2009; <b>11</b> :133–9. doi:10.1080/15532730903008073                              | Not a CPG. Single author.                                 |
| Bruessow DM, O’Connor LM, Eaman E, <i>et al.</i> Transgender Patients: Considerations for the Family Physician. <i>Fam Dr A J New York State Acad Fam Physicians</i> 2019; <b>7</b> :36–41.                                                                                                                     | Not a CPG. Single country.                                |

|    |                                                                                                                                                                                                                                                      |                                                  |
|----|------------------------------------------------------------------------------------------------------------------------------------------------------------------------------------------------------------------------------------------------------|--------------------------------------------------|
| 1  |                                                                                                                                                                                                                                                      |                                                  |
| 2  | Burns ZT, Bitterman DS, Liu KX, <i>et al.</i> Towards a standard of care in oncology for transgender patients. <i>Lancet Oncol</i> 2019; <b>20</b> :331–3.                                                                                           | Not a CPG. Single country.                       |
| 3  | doi:10.1016/S1470-2045(18)30942-2                                                                                                                                                                                                                    |                                                  |
| 4  | Byne W, Bradley SJ, Coleman E, <i>et al.</i> Treatment of gender identity disorder. <i>Am J Psychiatry</i> 2012; <b>169</b> :875–6. doi:10.1176/appi.ajp.2012.169.8.875                                                                              | Not a CPG.                                       |
| 5  | Canady V. APA practice guidelines for females focus on their strength, resilience. <i>Ment Heal Wkly</i> 2019; <b>29</b> :1–8. doi:10.1002/mhw                                                                                                       | Not a CPG. Single Country.<br>Single author.     |
| 6  |                                                                                                                                                                                                                                                      |                                                  |
| 7  | Capitán L, Gutiérrez Santamaría J, Simon D, <i>et al.</i> Facial Gender Confirmation Surgery. <i>Plast Reconstr Surg</i> 2020; <b>145</b> :818e–828e.                                                                                                | Not a CPG. Single Country.                       |
| 8  | doi:10.1097/PRS.0000000000006686                                                                                                                                                                                                                     |                                                  |
| 9  | Carswell JM, Roberts SA. Induction and Maintenance of Amenorrhea in Transmasculine and Nonbinary Adolescents. <i>Transgender Heal</i> 2017; <b>2</b> :195–                                                                                           | Not a CPG. Single country.                       |
| 10 | 201. doi:10.1089/trgh.2017.0021                                                                                                                                                                                                                      |                                                  |
| 11 | Chen D, Hidalgo MA, Leibowitz S, <i>et al.</i> Multidisciplinary Care for Gender-Diverse Youth: A Narrative Review and Unique Model of Gender-Affirming                                                                                              | Not a CPG.                                       |
| 12 | Care. <i>Transgender Heal</i> 2016; <b>1</b> :117–23. doi:10.1089/trgh.2016.0009                                                                                                                                                                     |                                                  |
| 13 | Church of England. <i>Valuing All God's Children: Challenging homophobic, biphobic and transphobic bullying</i> . 2nd ed. Church of England Education Office                                                                                         | Not a CPG.                                       |
| 14 | 2019. <a href="https://www.churchofengland.org/sites/default/files/2019-07/Valuing%20All%20God%27s%20Children%20July%202019_0.pdf">https://www.churchofengland.org/sites/default/files/2019-07/Valuing All God%27s Children July 2019_0.pdf</a>      |                                                  |
| 15 | Cohen J, Lo YR, Caceres CF, <i>et al.</i> WHO guidelines for HIV/STI prevention and care among MSM and transgender people: Implications for policy and                                                                                               | Not a CPG.                                       |
| 16 | practice. <i>Sex Transm Infect</i> 2013; <b>89</b> :536–8. doi:10.1136/sextrans-2013-051121                                                                                                                                                          |                                                  |
| 17 | Cohen-Kettenis PT, Klink D. Adolescents with gender dysphoria. <i>Best Pract Res Clin Endocrinol Metab</i> 2015; <b>29</b> :485–95.                                                                                                                  | Not a CPG.                                       |
| 18 | doi:10.1016/j.beem.2015.01.004                                                                                                                                                                                                                       |                                                  |
| 19 | Colebunders B, De Cuyper G, Monstrey S. New Criteria for Sex Reassignment Surgery: WPATH Standards of Care, Version 7, Revisited. <i>Int J</i>                                                                                                       | Not a CPG.                                       |
| 20 | <i>Transgenderism</i> 2015; <b>16</b> :222–33. doi:10.1080/15532739.2015.1081086                                                                                                                                                                     |                                                  |
| 21 | Coxon J, Seal L. Hormone management of trans men. <i>Trends Urol Men's Heal</i> 2018; <b>9</b> :8–12. doi:10.1002/tre.651                                                                                                                            | Not a CPG. Single country.                       |
| 22 | D'Angelo A, Panayotidis C, Amso N, <i>et al.</i> Recommendations for good practice in ultrasound: oocyte pick up†. <i>Hum Reprod Open</i> 2019; <b>2019</b> :1689–99.                                                                                | Not a CPG. No TG specific<br>recommendation.     |
| 23 | doi:10.1093/hropen/hoz025                                                                                                                                                                                                                            |                                                  |
| 24 | Dahl M, Feldman JL, Goldberg J, <i>et al.</i> Endocrine Therapy for Transgender Adults in British Columbia: Suggested Guidelines Physical Aspects of                                                                                                 | Single country.                                  |
| 25 | Transgender Endocrine Therapy. 2015. <a href="http://www.phsa.ca/transcarebc/Documents/HealthProf/BC-Trans-Adult-Endocrine-Guidelines-2015.pdf">http://www.phsa.ca/transcarebc/Documents/HealthProf/BC-Trans-Adult-Endocrine-Guidelines-2015.pdf</a> |                                                  |
| 26 | Davies S. The Evidence Behind the Practice: A Review of WPATH Suggested Guidelines in Transgender Voice and Communication. <i>Perspect ASHA</i>                                                                                                      | Single author.                                   |
| 27 | <i>Spec Interes Groups</i> 2017; <b>2</b> :64–73. doi:10.1044/persp2.SIG10.64                                                                                                                                                                        |                                                  |
| 28 | De Antonio IE, Gómez-Gil E. Coordination of healthcare for transsexual persons: A multidisciplinary approach. <i>Curr Opin Endocrinol Diabetes Obes</i>                                                                                              | Not a CPG.                                       |
| 29 | 2013; <b>20</b> :585–91. doi:10.1097/01.med.0000436182.42966.31                                                                                                                                                                                      |                                                  |
| 30 | de Haan G, Santos G-M, Arayasirikul S, <i>et al.</i> Non-Prescribed Hormone Use and Barriers to Care for Transgender Women in San Francisco. <i>LGBT Heal</i>                                                                                        | Not a CPG.                                       |
| 31 | 2015; <b>2</b> :313–23. doi:10.1089/lgbt.2014.0128                                                                                                                                                                                                   |                                                  |
| 32 | de Vries ALC, Cohen-Kettenis PT. Clinical management of gender dysphoria in children and adolescents: The Dutch approach. <i>J Homosex</i>                                                                                                           | Not a CPG.                                       |
| 33 | 2012; <b>59</b> :301–20. doi:10.1080/00918369.2012.653300                                                                                                                                                                                            |                                                  |
| 34 | Dèttore D, Ristori J, Antonelli P, <i>et al.</i> Gender dysphoria in adolescents: The need for a shared assessment protocol and proposal of the AGIR protocol.                                                                                       | Not a CPG.                                       |
| 35 | <i>J Psychopathol</i> 2015; <b>21</b> :152–8.                                                                                                                                                                                                        |                                                  |
| 36 | Deutsch MB, Green J, Keatley JA, <i>et al.</i> Electronic medical records and the transgender patient: Recommendations from the world professional                                                                                                   | Not a CPG. Single country.                       |
| 37 | association for Transgender Health EMR working group. <i>J Am Med Informatics Assoc</i> 2013; <b>20</b> :700–3. doi:10.1136/amiajnl-2012-001472                                                                                                      |                                                  |
| 38 | Devon Partnership NHS Trust. PG12 Pharmacological Treatment of Gender Dysphoria. 2015. <a href="https://www.gires.org.uk/wp-content/uploads/2014/08/PG12-GenderDysphoria.pdf">https://www.gires.org.uk/wp-</a>                                       | Single country.                                  |
| 39 | <a href="https://www.gires.org.uk/wp-content/uploads/2014/08/PG12-GenderDysphoria.pdf">content/uploads/2014/08/PG12-GenderDysphoria.pdf</a>                                                                                                          |                                                  |
| 40 | Etienne Tollinche L, Burrows Walters C, Radix A, <i>et al.</i> The perioperative care of the transgender patient. <i>Anesth Analg</i> 2018; <b>127</b> :359–66.                                                                                      | Not a CPG. Single country.                       |
| 41 | doi:10.1213/ANE.0000000000003371                                                                                                                                                                                                                     |                                                  |
| 42 | European Society of Human Genetics. Genetic testing in asymptomatic minors: Recommendations of the European Society of Human Genetics. <i>Eur J</i>                                                                                                  | No TG specific recommendation.<br>Single author. |
| 43 | <i>Hum Genet</i> 2009; <b>17</b> :720–1. doi:10.1038/ejhg.2009.26                                                                                                                                                                                    |                                                  |
| 44 |                                                                                                                                                                                                                                                      |                                                  |
| 45 |                                                                                                                                                                                                                                                      |                                                  |
| 46 |                                                                                                                                                                                                                                                      |                                                  |
| 47 |                                                                                                                                                                                                                                                      |                                                  |

|    |                                                                                                                                                                                                                                                                                                                                                                    |                                  |
|----|--------------------------------------------------------------------------------------------------------------------------------------------------------------------------------------------------------------------------------------------------------------------------------------------------------------------------------------------------------------------|----------------------------------|
| 1  |                                                                                                                                                                                                                                                                                                                                                                    |                                  |
| 2  | Finlayson C, Johnson EK, Chen D, <i>et al.</i> Proceedings of the Working Group Session on Fertility Preservation for Individuals with Gender and Sex                                                                                                                                                                                                              | Not a CPG.                       |
| 3  | Diversity. <i>Transgender Heal</i> 2016; <b>1</b> :99–107. doi:10.1089/trgh.2016.0008                                                                                                                                                                                                                                                                              |                                  |
| 4  | Fisher CB, Fried AL, Desmond M, <i>et al.</i> Perceived barriers to HIV prevention services for transgender youth. <i>LGBT Heal</i> 2018; <b>5</b> :350–8.                                                                                                                                                                                                         | Not a CPG.                       |
| 5  | doi:10.1089/lgbt.2017.0098                                                                                                                                                                                                                                                                                                                                         |                                  |
| 6  | Francis C, Grober E, Potter E, <i>et al.</i> A Simple Guide for Simple Orchiectomy in Transition-Related Surgeries. <i>Sex Med Rev</i> 2020; <b>3</b> –7.                                                                                                                                                                                                          | Not a CPG. Single country.       |
| 7  | doi:10.1016/j.sxmr.2019.11.004                                                                                                                                                                                                                                                                                                                                     |                                  |
| 8  | Fraser L. Psychotherapy in the world professional association for transgender health's standards of care: Background and recommendations. <i>Int J</i>                                                                                                                                                                                                             | Not a CPG. Single author.        |
| 9  | <i>Transgenderism</i> 2009; <b>11</b> :110–26. doi:10.1080/15532730903008057                                                                                                                                                                                                                                                                                       |                                  |
| 10 | Gamble RM, Taylor SS, Huggins AD, <i>et al.</i> Trans-specific Geriatric Health Assessment (TGHA): An inclusive clinical guideline for the geriatric                                                                                                                                                                                                               | Not a CPG. Single country.       |
| 11 | transgender patient in a primary care setting. <i>Maturitas</i> 2020; <b>132</b> :70–5. doi:10.1016/j.maturitas.2019.12.005                                                                                                                                                                                                                                        |                                  |
| 12 | GIRES. Guidance for GPs , other clinicians and health professionals on the care of gender variant people Transgender wellbeing and healthcare. UK                                                                                                                                                                                                                  | Single country. Out of date.     |
| 13 | Dep. Heal. 2008. <a href="https://midessexccg.nhs.uk/medicines-optimisation/clinical-pathways-and-medication-guidelines/chapter-6-endocrine-system-2/1142-guidance-for-gps-and-hormone-treatment-for-gender-dysphoria-1/file">https://midessexccg.nhs.uk/medicines-optimisation/clinical-pathways-and-medication-guidelines/chapter-6-endocrine-system-2/1142-</a> |                                  |
| 14 | <a href="https://midessexccg.nhs.uk/medicines-optimisation/clinical-pathways-and-medication-guidelines/chapter-6-endocrine-system-2/1142-guidance-for-gps-and-hormone-treatment-for-gender-dysphoria-1/file">guidance-for-gps-and-hormone-treatment-for-gender-dysphoria-1/file</a>                                                                                |                                  |
| 15 | Goeckenjan M, Glaß K, Torka S, <i>et al.</i> Indications for fertility preservation. <i>Gynakologische Endokrinol</i> 2019; <b>7</b> :1–7. doi:10.1007/s10304-019-0241-3                                                                                                                                                                                           | Not a CPG. Single country.       |
| 16 | Griffith C, Akers W, Dispenza F, <i>et al.</i> Standards of Care for Research with Participants Who Identify as LGBTQ+. <i>J LGBT Issues Couns</i> 2017; <b>11</b> :212–                                                                                                                                                                                           | Not a CPG. Single country        |
| 17 | 29. doi:10.1080/15538605.2017.1380549                                                                                                                                                                                                                                                                                                                              |                                  |
| 18 | Guidance on Gender Dysphoria for Nurses. <i>Nurs Stand</i> 2013; <b>28</b> :10. doi:10.7748/ns2013.10.28.9.10.s10                                                                                                                                                                                                                                                  | Not a CPG.                       |
| 19 | Hagen DB, Galupo MP. Trans* Individuals' Experiences of Gendered Language with Health Care Providers: Recommendations for Practitioners. <i>Int J</i>                                                                                                                                                                                                              | Not a CPG.                       |
| 20 | <i>Transgenderism</i> 2014; <b>15</b> :16–34. doi:10.1080/15532739.2014.890560                                                                                                                                                                                                                                                                                     |                                  |
| 21 | Hamidi O, Davidge-Pitts CJ. Transfeminine Hormone Therapy. <i>Endocrinol Metab Clin North Am</i> 2019; <b>48</b> :341–55. doi:10.1016/j.ecl.2019.02.001                                                                                                                                                                                                            | Not a CPG. Single country.       |
| 22 | Health Policy Project, Asia Pacific Transgender Network, United Nations Development Programme. <i>Blueprint for the provision of comprehensive care for</i>                                                                                                                                                                                                        | Not a CPG.                       |
| 23 | <i>trans people and trans communities in Asia and the Pacific.</i> Washington, DC: Futures Group, Health Policy Project 2015. <a href="http://www.asia-pacific.undp.org/content/rbap/en/home/library/democratic_governance/hiv_aids/blueprint-for-the-provision-of-comprehensive-care-for-trans-peopl/">http://www.asia-</a>                                       |                                  |
| 24 | <a href="http://www.asia-pacific.undp.org/content/rbap/en/home/library/democratic_governance/hiv_aids/blueprint-for-the-provision-of-comprehensive-care-for-trans-peopl/">pacific.undp.org/content/rbap/en/home/library/democratic_governance/hiv_aids/blueprint-for-the-provision-of-comprehensive-care-for-trans-peopl/</a>                                      |                                  |
| 25 | Heidari S, Babor TF, De Castro P, <i>et al.</i> Sex and Gender Equity in Research: rationale for the SAGER guidelines and recommended use. <i>Res Integr</i>                                                                                                                                                                                                       | Not a CPG.                       |
| 26 | <i>Peer Rev</i> 2016; <b>1</b> :1–9. doi:10.1186/s41073-016-0007-6                                                                                                                                                                                                                                                                                                 |                                  |
| 27 | Hembree W, Cohen-Kettenis P, Gooren L, <i>et al.</i> Endocrine treatment of gender-dysphoric/ gender-incongruent persons: an endocrine society clinical                                                                                                                                                                                                            | Reprint of included paper (fully |
| 28 | practice guideline. <i>Endocr Pract</i> 2017; <b>23</b> :1437–71.                                                                                                                                                                                                                                                                                                  | cited).                          |
| 29 | Hirsch S, Pickering J, Adler R. Meeting the Needs of Trans and Gender Diverse Youth: The Varied, Ubiquitous Role of the Speech-Language                                                                                                                                                                                                                            | Not a CPG. Single country.       |
| 30 | Pathologist in Voice and Communication Therapy/Training. <i>Perspect ASHA Spec Interes Groups</i> 2019; <b>4</b> :111–7. doi:10.1044/2018_PERS-SIG3-2018-                                                                                                                                                                                                          |                                  |
| 31 | 0016                                                                                                                                                                                                                                                                                                                                                               |                                  |
| 32 | House H, Gaines S, Hawkins LA. Sexual and Gender Minority Adolescents: Meeting the Needs of Our LGBTQ Patients and Their Families. <i>Clin Pediatr</i>                                                                                                                                                                                                             | Not a CPG. Single country.       |
| 33 | <i>Emerg Med</i> 2019; <b>20</b> :9–16. doi:10.1016/j.cpem.2019.02.004                                                                                                                                                                                                                                                                                             |                                  |
| 34 | Hughes LD, Berzin OKG, Leung M, <i>et al.</i> Adapting Healthcare Quality Measures to Transgender Individuals. <i>LGBT Heal</i> 2017; <b>4</b> :248–51.                                                                                                                                                                                                            | Not a CPG. Single country.       |
| 35 | doi:10.1089/lgbt.2017.0009                                                                                                                                                                                                                                                                                                                                         |                                  |
| 36 | Human Rights Campaign, American Academy of Pediatrics, American College of Osteopathic Pediatricians. Supporting & Caring for Transgender                                                                                                                                                                                                                          | Not a CPG. Single country.       |
| 37 | Children. 2016. <a href="http://hrc.im/supportingtranschildren">http://hrc.im/supportingtranschildren</a>                                                                                                                                                                                                                                                          |                                  |
| 38 | IAPAC. IAPAC Protocols for the Integrated Management of HIV and Noncommunicable Diseases. <i>Int Assoc Provid AIDS care</i> Published Online First:                                                                                                                                                                                                                | No TG specific recommendation.   |
| 39 | 2018. <a href="https://www.iapac.org/files/2018/07/IAPAC-Protocols-for-the-Integrated-Management-of-HIV-and-Noncommunicable-Diseases_3.pdf">https://www.iapac.org/files/2018/07/IAPAC-Protocols-for-the-Integrated-Management-of-HIV-and-Noncommunicable-Diseases_3.pdf</a>                                                                                        |                                  |
| 40 | IMAP. IMAP Statement on hormone therapy for transgender people. Published Online First: 2015.                                                                                                                                                                                                                                                                      | Not a CPG.                       |
| 41 | <a href="https://www.ipdf.org/sites/default/files/ipdf_imap_transgender.pdf">https://www.ipdf.org/sites/default/files/ipdf_imap_transgender.pdf</a>                                                                                                                                                                                                                |                                  |
| 42 | In Case You Haven't Heard. <i>Mental Health Weekly</i> 2015; <b>25</b> :8-8. doi:10.1002/mhw.30307                                                                                                                                                                                                                                                                 | Not a CPG.                       |
| 43 | International Association for the Study of Pain. <i>Guide to Pain Management in Low-Resource Settings.</i> Seattle: : IASP 2010. <a href="https://ebooks.iasp-">https://ebooks.iasp-</a>                                                                                                                                                                           | Not a CPG. No TG specific        |
| 44 |                                                                                                                                                                                                                                                                                                                                                                    |                                  |
| 45 |                                                                                                                                                                                                                                                                                                                                                                    |                                  |
| 46 |                                                                                                                                                                                                                                                                                                                                                                    |                                  |
| 47 |                                                                                                                                                                                                                                                                                                                                                                    |                                  |

|    |                                                                                                                                                                                                                                                                                                                                                                                  |                                    |
|----|----------------------------------------------------------------------------------------------------------------------------------------------------------------------------------------------------------------------------------------------------------------------------------------------------------------------------------------------------------------------------------|------------------------------------|
| 1  |                                                                                                                                                                                                                                                                                                                                                                                  |                                    |
| 2  | <a href="http://pain.org/guide_to_pain_management_in_low_resource_settings">pain.org/guide_to_pain_management_in_low_resource_settings</a>                                                                                                                                                                                                                                       | recommendation.                    |
| 3  | International Association of Physicians in AIDS Care. IAPAC – Blueprint to Address the Sexual and Reproductive Health Care and STI/HIV Prevention                                                                                                                                                                                                                                | No TG specific recommendation.     |
| 4  | Needs of Adolescent Girls and Young Women. Published Online First: 2011. <a href="https://www.iapac.org/guidance/recommendations/blueprint-to-address-the-sexual-and-reproductive-health-care-and-sti-hiv-prevention-needs-of-adolescent-girls-and-young-women-in-latin-america-and-the-caribbean/">https://www.iapac.org/guidance/recommendations/blueprint-to-address-the-</a> |                                    |
| 5  | <a href="https://www.iapac.org/guidance/recommendations/blueprint-to-address-the-sexual-and-reproductive-health-care-and-sti-hiv-prevention-needs-of-adolescent-girls-and-young-women-in-latin-america-and-the-caribbean/">sexual-and-reproductive-health-care-and-sti-hiv-prevention-needs-of-adolescent-girls-and-young-women-in-latin-america-and-the-caribbean/</a>          |                                    |
| 6  | International Association of Providers in AIDS Care. Recommendations for the rapid expansion of HIV self-testing in Fast-Track Cities. Published Online                                                                                                                                                                                                                          | No TG specific recommendation.     |
| 7  | First: 2017. <a href="http://www.iapac.org/uploads/IAPAC-ASLM-HIVST-FTC-Recommendations-012617.pdf">http://www.iapac.org/uploads/IAPAC-ASLM-HIVST-FTC-Recommendations-012617.pdf</a>                                                                                                                                                                                             |                                    |
| 8  | International Planned Parenthood Federation. IPPF. Hormonal contraception: recommendations for women at high risk of HIV. Published Online First:                                                                                                                                                                                                                                | Not a CPG. No TG specific          |
| 9  | 2017. <a href="http://www.ippf.org/sites/default/files/2017-07/ippf_technical_brief_HC_HIV_June2017.pdf">http://www.ippf.org/sites/default/files/2017-07/ippf_technical_brief_HC_HIV_June2017.pdf</a>                                                                                                                                                                            | recommendation.                    |
| 10 | International Planned Parenthood Federation. Putting sexuality back into Comprehensive Sexuality Education: making the case for a rights-based, sex-                                                                                                                                                                                                                             | Not a CPG. No TG specific          |
| 11 | positive approach. Published Online First: 2016. <a href="https://www.ippf.org/sites/default/files/2016-10/Putting_Sexuality_back_into_Comprehensive_Sexuality_Education_0.pdf">https://www.ippf.org/sites/default/files/2016-10/Putting_Sexuality_back_into_Comprehensive_Sexuality</a>                                                                                         | recommendation.                    |
| 12 | <a href="https://www.ippf.org/sites/default/files/2016-10/Putting_Sexuality_back_into_Comprehensive_Sexuality_Education_0.pdf">Education_0.pdf</a>                                                                                                                                                                                                                               |                                    |
| 13 | Jungwirth, A; Diemer, T; Kopa, Z; Krausz, C; Minhas, S; Tournaye H. <i>EAU Guidelines on Male Infertility</i> . European Association of Urology 2018.                                                                                                                                                                                                                            | Superseded by 2020 CPG with        |
| 14 |                                                                                                                                                                                                                                                                                                                                                                                  | no TG recommendations              |
| 15 | Kaltiala-Heino R, Bergman H, Työläjärvi M, et al. Gender dysphoria in adolescence: current perspectives. <i>Adolesc Health Med Ther</i> 2018; <b>9</b> :31–41.                                                                                                                                                                                                                   | Not a CPG.                         |
| 16 | doi:10.2147/AHMT.S135432                                                                                                                                                                                                                                                                                                                                                         |                                    |
| 17 | Karasic DH, Fraser L. Multidisciplinary Care and the Standards of Care for Transgender and Gender Nonconforming Individuals. <i>Clin Plast Surg</i>                                                                                                                                                                                                                              | Derivative, not de novo.           |
| 18 | 2018; <b>45</b> :295–9. doi:10.1016/j.cps.2018.03.016                                                                                                                                                                                                                                                                                                                            |                                    |
| 19 | Kemp K, Dibley L, Chauhan U, et al. Second N-ECCO Consensus Statements on the European Nursing Roles in Caring for Patients with Crohn's                                                                                                                                                                                                                                         | No TG specific recommendation.     |
| 20 | Disease or Ulcerative Colitis. <i>J Crohn's Colitis</i> 2018; <b>12</b> :760–76. doi:10.1093/ecco-jcc/jjy020                                                                                                                                                                                                                                                                     |                                    |
| 21 | Khosla S, Davidge-Pitts C. Skeletal considerations in the medical treatment of transgender people. <i>Lancet Diabetes Endocrinol</i> 2019; <b>7</b> :893–5.                                                                                                                                                                                                                      | Not a CPG.                         |
| 22 | doi:10.1016/S2213-8587(19)30353-5                                                                                                                                                                                                                                                                                                                                                |                                    |
| 23 | Klein DA, Malcolm NM, Berry-Bibee EN, et al. Quality Primary Care and Family Planning Services for LGBT Clients: A Comprehensive Review of Clinical                                                                                                                                                                                                                              | Not a CPG. No TG specific          |
| 24 | Guidelines. <i>LGBT Health</i> . 2018; <b>5</b> :153-170. Doi:10.1089/lgbt.2017.0213                                                                                                                                                                                                                                                                                             | recommendation. Derivative, not    |
| 25 |                                                                                                                                                                                                                                                                                                                                                                                  | de novo. Single country.           |
| 26 | Klein M, Sathasivam A, Novoa Y, et al. Recent Consensus Statements in Pediatric Endocrinology: A Selective Review. <i>Pediatr Clin North Am</i>                                                                                                                                                                                                                                  | Not CPG. Derivative not de novo.   |
| 27 | 2011; <b>58</b> :1301–15. doi:10.1016/j.pcl.2011.07.014                                                                                                                                                                                                                                                                                                                          | No TG specific recommendation.     |
| 28 | LGBT Health Program. <i>Guidelines and Protocols for Hormone Therapy and Primary Health Care for Trans Clients</i> . Toronto: Sherbourne Health Centre                                                                                                                                                                                                                           | Single country. Single author.     |
| 29 | 2015. <a href="http://sherbourne.on.ca/lgbt-health/guidelines-protocols-for-trans-care/">http://sherbourne.on.ca/lgbt-health/guidelines-protocols-for-trans-care/</a>                                                                                                                                                                                                            |                                    |
| 30 | MacDonald S, Smith S. Dermatologists guide to cultural competency and the LGBTIQ patient. <i>Australas J Dermatol</i> 2018; <b>59</b> :85.                                                                                                                                                                                                                                       | Not a CPG.                         |
| 31 | Martinez C, Rikhi R, Haque T, et al. Gender Identity, Hormone Therapy, and Cardiovascular Disease Risk. <i>Curr Probl Cardiol</i> 2020; <b>45</b> .                                                                                                                                                                                                                              | Not a CPG.                         |
| 32 | doi:10.1016/j.cpcardiol.2018.09.003                                                                                                                                                                                                                                                                                                                                              |                                    |
| 33 | Meyenburg B, Korte A, Moller B, et al. Gender identity disorders in childhood and adolescence (F64) / Störungen der Geschlechtsidentität im Kindes-                                                                                                                                                                                                                              | Not a CPG.                         |
| 34 | und Jugendalter (F64). <i>Prax Kinderpsychol Kinderpsychiatr</i> 2014; <b>63</b> :542–52.                                                                                                                                                                                                                                                                                        |                                    |
| 35 | Moreno-Pérez Ó, Esteva De Antonio I. Clinical practice guidelines for assessment and treatment of transsexualism. SEEN Identity and Sexual                                                                                                                                                                                                                                       | Single country. Derivative, not de |
| 36 | Differentiation Group (GIDSEEN). <i>Endocrinol y Nutr (English Ed)</i> 2012; <b>59</b> :367–82. doi:10.1016/j.endoen.2012.07.004                                                                                                                                                                                                                                                 | novo.                              |
| 37 | NHS England. Interim Gender Dysphoria Protocol and Service Guideline 2013/14. Published Online First: 2013. <a href="https://www.gendergp.com/wp-content/uploads/2016/03/NHS-Gender-Protocol.pdf">https://www.gendergp.com/wp-</a>                                                                                                                                               | Not a CPG. Single country.         |
| 38 | <a href="https://www.gendergp.com/wp-content/uploads/2016/03/NHS-Gender-Protocol.pdf">content/uploads/2016/03/NHS-Gender-Protocol.pdf</a>                                                                                                                                                                                                                                        |                                    |
| 39 | Oliphant J, Veale J, Macdonald J, et al. Guidelines for Gender Affirming Healthcare for Gender Diverse and Transgender Children, Young People and                                                                                                                                                                                                                                | Single country.                    |
| 40 | Adults in Aotearoa, New Zealand. <i>N Z Med J</i> 2018; <b>131</b> :86–96. <a href="http://www.ncbi.nlm.nih.gov/pubmed/30543615">http://www.ncbi.nlm.nih.gov/pubmed/30543615</a>                                                                                                                                                                                                 |                                    |
| 41 | Olson J, Schragger SM, Clark LF, et al. Subcutaneous Testosterone: An Effective Delivery Mechanism for Masculinizing Young Transgender Men. <i>LGBT</i>                                                                                                                                                                                                                          | Not a CPG.                         |
| 42 | <i>Heal</i> 2014; <b>1</b> :165–7. doi:10.1089/lgbt.2014.0018                                                                                                                                                                                                                                                                                                                    |                                    |
| 43 | Pan American Health Organization [PAHO], John Snow Inc., World Professional Association for Transgender Health, et al. <i>Blueprint for the Provision of</i>                                                                                                                                                                                                                     | Not a CPG.                         |

|    |                                                                                                                                                                                                                                                                                                                                                                                                                                                                                                                                                                                                                         |                                |
|----|-------------------------------------------------------------------------------------------------------------------------------------------------------------------------------------------------------------------------------------------------------------------------------------------------------------------------------------------------------------------------------------------------------------------------------------------------------------------------------------------------------------------------------------------------------------------------------------------------------------------------|--------------------------------|
| 1  |                                                                                                                                                                                                                                                                                                                                                                                                                                                                                                                                                                                                                         |                                |
| 2  | <i>Comprehensive Care for Trans Persons and Their Communities in the Caribbean and Other Anglophone Countries</i> . Arlington VA: John Snow Inc 2014.                                                                                                                                                                                                                                                                                                                                                                                                                                                                   |                                |
| 3  | <a href="https://www.paho.org/hq/dmdocuments/2014/2014-cha-blueprint-comprehensive-anglo-countries.pdf">https://www.paho.org/hq/dmdocuments/2014/2014-cha-blueprint-comprehensive-anglo-countries.pdf</a>                                                                                                                                                                                                                                                                                                                                                                                                               |                                |
| 4  | Pan American Health Organization. <i>Blueprint for the Provision of Comprehensive Care to Gay Men and Other Men Who Have Sex with Men (MSM) in Latin America and the Caribbean</i> . Washington, D.C.: 2010                                                                                                                                                                                                                                                                                                                                                                                                             | No TG specific recommendation. |
| 5  |                                                                                                                                                                                                                                                                                                                                                                                                                                                                                                                                                                                                                         |                                |
| 6  | Patel JM, Dolitsky S, Bachman GA, <i>et al</i> . Gynecologic cancer screening in the transgender male population and its current challenges. <i>Maturitas</i>                                                                                                                                                                                                                                                                                                                                                                                                                                                           | Not a CPG. Single country.     |
| 7  | 2019; <b>129</b> :40–4. doi:10.1016/j.maturitas.2019.08.009                                                                                                                                                                                                                                                                                                                                                                                                                                                                                                                                                             |                                |
| 8  | Phillips JC, Patsdaughter CA. Toward a Healthier Tomorrow: Competent Health and HIV Care for Transgender Persons. <i>J Assoc Nurses AIDS Care</i>                                                                                                                                                                                                                                                                                                                                                                                                                                                                       | Not a CPG.                     |
| 9  | 2010; <b>21</b> :183–5. doi:10.1016/j.jana.2010.02.009                                                                                                                                                                                                                                                                                                                                                                                                                                                                                                                                                                  |                                |
| 10 | Potter J, Peitzmeier SM, Bernstein I, <i>et al</i> . Cervical Cancer Screening for Patients on the Female-to-Male Spectrum: a Narrative Review and Guide for Clinicians. <i>J Gen Intern Med</i> 2015; <b>30</b> :1857–64. doi:10.1007/s11606-015-3462-8                                                                                                                                                                                                                                                                                                                                                                | Not a CPG.                     |
| 11 |                                                                                                                                                                                                                                                                                                                                                                                                                                                                                                                                                                                                                         |                                |
| 12 | Pratt-Chapman M, Potter J. Cancer Care Considerations for Sexual and Gender Minority Patients. <i>Oncol Issues</i> 2019; <b>34</b> :26–36. <a href="https://www.acccancer.org/docs/documents/oncology-issues/articles/nd19/nd19-cancer-care-considerations-for-sexual-and-gender-minority-patients.pdf?sfvrsn=d116445f_2">https://www.acccancer.org/docs/documents/oncology-issues/articles/nd19/nd19-cancer-care-considerations-for-sexual-and-gender-minority-patients.pdf?sfvrsn=d116445f_2</a>                                                                                                                      | Not a CPG. Single country.     |
| 13 |                                                                                                                                                                                                                                                                                                                                                                                                                                                                                                                                                                                                                         |                                |
| 14 | Psychological Society of South Africa. <i>Practice Guidelines For Psychology Professionals Working With Sexually And Gender-Diverse People</i> . Johannesburg: Psychological Society of South Africa 2017. <a href="https://www.psyssa.com/wp-content/uploads/2018/04/PsySSA-Diversity-Competence-Practice-Guidelines-PRINT-singlesided.pdf">https://www.psyssa.com/wp-content/uploads/2018/04/PsySSA-Diversity-Competence-Practice-Guidelines-PRINT-singlesided.pdf</a>                                                                                                                                                | Single country.                |
| 15 |                                                                                                                                                                                                                                                                                                                                                                                                                                                                                                                                                                                                                         |                                |
| 16 | Radix A, Sevelius J, Deutsch MB. Transgender women, hormonal therapy and HIV treatment: A comprehensive review of the literature and recommendations for best practices. <i>J Int AIDS Soc</i> 2016; <b>19</b> :1–8. doi:10.7448/IAS.19.3.20810                                                                                                                                                                                                                                                                                                                                                                         | Not a CPG.                     |
| 17 |                                                                                                                                                                                                                                                                                                                                                                                                                                                                                                                                                                                                                         |                                |
| 18 | Reilly M, Desousa V, Garza-Flores A, <i>et al</i> . Young Children With Gender Nonconforming Behaviors and Preferences. <i>J Dev Behav Pediatr</i> 2019; <b>40</b> :60–71. doi:10.1097/DBP.0000000000000612                                                                                                                                                                                                                                                                                                                                                                                                             | Not a CPG. Single country.     |
| 19 |                                                                                                                                                                                                                                                                                                                                                                                                                                                                                                                                                                                                                         |                                |
| 20 | Reisner SL, Pardo ST, Gamarel KE, <i>et al</i> . Substance use to cope with stigma in healthcare among U.S. female-to-male trans masculine adults. <i>LGBT Heal</i> 2015; <b>2</b> :324–32. doi:10.1089/lgbt.2015.0001                                                                                                                                                                                                                                                                                                                                                                                                  | Not a CPG.                     |
| 21 |                                                                                                                                                                                                                                                                                                                                                                                                                                                                                                                                                                                                                         |                                |
| 22 | Safer JD, Tangpricha V. Care of Transgender persons. <i>N Engl J Med</i> 2019; <b>381</b> :2451–60. doi:10.1056/NEJMcp1903650                                                                                                                                                                                                                                                                                                                                                                                                                                                                                           | Not a CPG. Single country.     |
| 23 |                                                                                                                                                                                                                                                                                                                                                                                                                                                                                                                                                                                                                         |                                |
| 24 | Salas-Humara C, Sequeira GM, Rossi W, <i>et al</i> . Gender affirming medical care of transgender youth. <i>Curr Probl Pediatr Adolesc Health Care</i> 2019; <b>49</b> :1–21. doi:10.1016/j.cppeds.2019.100683                                                                                                                                                                                                                                                                                                                                                                                                          | Not a CPG. Single country.     |
| 25 |                                                                                                                                                                                                                                                                                                                                                                                                                                                                                                                                                                                                                         |                                |
| 26 | Schechter LS, D'Arpa S, Cohen MN, <i>et al</i> . Gender Confirmation Surgery: Guiding Principles. <i>J Sex Med</i> 2017; <b>14</b> :852–6. doi:10.1016/j.jsxm.2017.04.001                                                                                                                                                                                                                                                                                                                                                                                                                                               | Not a CPG.                     |
| 27 |                                                                                                                                                                                                                                                                                                                                                                                                                                                                                                                                                                                                                         |                                |
| 28 | Selvaggi G, Dhejne C, Landen M, <i>et al</i> . The 2011 WPATH standards of care and penile reconstruction in female-to-male transsexual individuals. <i>Adv Urol</i> 2012; <b>2012</b> . doi:10.1155/2012/581712                                                                                                                                                                                                                                                                                                                                                                                                        | Not a CPG.                     |
| 29 |                                                                                                                                                                                                                                                                                                                                                                                                                                                                                                                                                                                                                         |                                |
| 30 | Shpherd JC, Kauth MR, Firek AF, <i>et al</i> . Interdisciplinary Transgender Veteran Care: Development of a Core Curriculum for VHA Providers. <i>Transgender Heal</i> 2016; <b>1</b> :54–62. doi:10.1089/trgh.2015.0004                                                                                                                                                                                                                                                                                                                                                                                                | Not a CPG.                     |
| 31 |                                                                                                                                                                                                                                                                                                                                                                                                                                                                                                                                                                                                                         |                                |
| 32 | Shumer DE, Reisner SL, Edwards-Leeper L, <i>et al</i> . Evaluation of Asperger Syndrome in Youth Presenting to a Gender Dysphoria Clinic. <i>LGBT Heal</i> 2016; <b>3</b> :387–90. doi:10.1089/lgbt.2015.0070                                                                                                                                                                                                                                                                                                                                                                                                           | Not a CPG.                     |
| 33 |                                                                                                                                                                                                                                                                                                                                                                                                                                                                                                                                                                                                                         |                                |
| 34 | Speiser PW, Arlt W, Auchus RJ, <i>et al</i> . Congenital Adrenal Hyperplasia Due to Steroid 21-Hydroxylase Deficiency: An Endocrine Society* Clinical Practice Guideline. <i>J Clin Endocrinol Metab</i> 2018; <b>103</b> :4043–88. doi:10.1210/jc.2018-01865                                                                                                                                                                                                                                                                                                                                                           | No TG specific recommendation. |
| 35 |                                                                                                                                                                                                                                                                                                                                                                                                                                                                                                                                                                                                                         |                                |
| 36 | Staples JM, Bird ER, Masters TN, <i>et al</i> . Considerations for Culturally Sensitive Research With Transgender Adults: A Qualitative Analysis. <i>J Sex Res</i> 2018; <b>55</b> :1065–76. doi:10.1080/00224499.2017.1292419                                                                                                                                                                                                                                                                                                                                                                                          | Not a CPG. Single country.     |
| 37 |                                                                                                                                                                                                                                                                                                                                                                                                                                                                                                                                                                                                                         |                                |
| 38 | Subramanyam A, Mukherjee A, Dave M, <i>et al</i> . Clinical practice guidelines for autism spectrum disorders. <i>Indian J Psychiatry</i> 2019; <b>61</b> :254. doi:10.4103/psychiatry.IndianJPsychiatry_542_18                                                                                                                                                                                                                                                                                                                                                                                                         | Single country.                |
| 39 |                                                                                                                                                                                                                                                                                                                                                                                                                                                                                                                                                                                                                         |                                |
| 40 | Telfer MM, Tollit MA, Pace CC, <i>et al</i> . <i>Australian Standards of Care and Treatment Guidelines for Trans and Gender Diverse Children and Adolescents Version 1.1</i> . Melbourne: The Royal Children's Hospital 2018. <a href="https://www.rch.org.au/uploadedFiles/Main/Content/adolescent-medicine/australian-standards-of-care-and-treatment-guidelines-for-trans-and-gender-diverse-children-and-adolescents.pdf">https://www.rch.org.au/uploadedFiles/Main/Content/adolescent-medicine/australian-standards-of-care-and-treatment-guidelines-for-trans-and-gender-diverse-children-and-adolescents.pdf</a> | Single country.                |
| 41 |                                                                                                                                                                                                                                                                                                                                                                                                                                                                                                                                                                                                                         |                                |
| 42 | The Lancet. New guidelines on transgender health. <i>Lancet</i> 2013; <b>382</b> :1460. doi:10.1016/S0140-6736(13)62277-1                                                                                                                                                                                                                                                                                                                                                                                                                                                                                               | Not a CPG.                     |
| 43 |                                                                                                                                                                                                                                                                                                                                                                                                                                                                                                                                                                                                                         |                                |
| 44 |                                                                                                                                                                                                                                                                                                                                                                                                                                                                                                                                                                                                                         |                                |
| 45 |                                                                                                                                                                                                                                                                                                                                                                                                                                                                                                                                                                                                                         |                                |
| 46 |                                                                                                                                                                                                                                                                                                                                                                                                                                                                                                                                                                                                                         |                                |
| 47 |                                                                                                                                                                                                                                                                                                                                                                                                                                                                                                                                                                                                                         |                                |

|    |                                                                                                                                                                                                                                                                                               |                                |
|----|-----------------------------------------------------------------------------------------------------------------------------------------------------------------------------------------------------------------------------------------------------------------------------------------------|--------------------------------|
| 1  |                                                                                                                                                                                                                                                                                               |                                |
| 2  | Thibaut F, Bradford JMW, Briken P, <i>et al.</i> The World Federation of Societies of Biological Psychiatry (WFSBP) guidelines for the treatment of adolescent                                                                                                                                | No TG specific recommendation. |
| 3  | sexual offenders with paraphilic disorders. <i>World J Biol Psychiatry</i> 2016; <b>17</b> :2–38. doi:10.3109/15622975.2015.1085598                                                                                                                                                           |                                |
| 4  | Tonnesen P, Carrozzi L, Fagerstrom KO, <i>et al.</i> Smoking cessation in patients with respiratory diseases: a high priority, integral component of therapy.                                                                                                                                 | No TG specific recommendation. |
| 5  | <i>Eur Respir J</i> 2007; <b>29</b> :390–417. doi:10.1183/09031936.00060806                                                                                                                                                                                                                   |                                |
| 6  | Trans Guidance for CoE Schools. <i>Ther Today</i> 2017; <b>28</b> :7. <a href="https://www.bacp.co.uk/media/2350/bacp-therapy-today-dec17.pdf">https://www.bacp.co.uk/media/2350/bacp-therapy-today-dec17.pdf</a>                                                                             | Not a CPG.                     |
| 7  | UCSF Transgender Care. <i>Guidelines for the Primary and Gender-Affirming Care of Transgender and Gender Nonbinary People</i> . 2nd ed. San Francisco:                                                                                                                                        | Single country.                |
| 8  | Department of Family and Community Medicine University of California San Francisco 2016. <a href="https://transcare.ucsf.edu/guidelines">https://transcare.ucsf.edu/guidelines</a>                                                                                                            |                                |
| 9  | Vale K, Johnson TW, Jansen MS, <i>et al.</i> The development of standards of care for individuals with a male-to-eunuch gender identity disorder. <i>Int J</i>                                                                                                                                | Not a CPG.                     |
| 10 | <i>Transgenderism</i> 2010; <b>12</b> :40–51. doi:10.1080/15532731003749095                                                                                                                                                                                                                   |                                |
| 11 | Walton HM, Baker SL. Treating Transgender Individuals in Inpatient and Residential Mental Health Settings. <i>Cogn Behav Pract</i> 2019; <b>26</b> :592–602.                                                                                                                                  | Not a CPG. Single country.     |
| 12 | doi:10.1016/j.cbpra.2017.09.006                                                                                                                                                                                                                                                               |                                |
| 13 | Webb AJ, McManus D, Rouse GE, <i>et al.</i> Implications for medication dosing for transgender patients: A review of the literature and recommendations for                                                                                                                                   | Single country.                |
| 14 | pharmacists. <i>Am J Heal Pharm</i> 2020; <b>77</b> :427–33. doi:10.1093/ajhp/zxz355                                                                                                                                                                                                          |                                |
| 15 | Whitehead-Pleaux A, Donnerwerth A, Robinson B, <i>et al.</i> Lesbian, gay, bisexual, transgender, and questioning: Best practices in music therapy. <i>Music</i>                                                                                                                              | Not a CPG. Single country.     |
| 16 | <i>Ther Perspect</i> 2012; <b>30</b> :158–66. doi:10.1093/mtp/30.2.158                                                                                                                                                                                                                        |                                |
| 17 | Wood BR, Spach DH. HIV in Sexual and Gender Minority Populations. <i>Natl. HIV Curric.</i> 2020. <a href="https://www.hiv.uw.edu/go/key-populations/hiv-sexual-gender-minority-populations/core-concept/all">https://www.hiv.uw.edu/go/key-populations/hiv-sexual-</a>                        | Not a CPG. Single country.     |
| 18 | <a href="https://www.hiv.uw.edu/go/key-populations/hiv-sexual-gender-minority-populations/core-concept/all">gender-minority-populations/core-concept/all</a>                                                                                                                                  |                                |
| 19 | Workowski KA, Bolan GA. Centers for Disease Control and Prevention. Sexually transmitted diseases treatment guidelines, 2015 [published correction                                                                                                                                            | Single country.                |
| 20 | appears in <i>MMWR Recomm Rep.</i> 2015; <b>64</b> :924]. <i>MMWR Recomm Rep.</i> 2015; <b>64</b> :1–137.                                                                                                                                                                                     |                                |
| 21 | World Anti-Doping Program. <i>TUE Physician Guidelines Transgender Athletes</i> . 1.1. 2019. <a href="https://www.wada-ama.org/en/resources/therapeutic-use-exemption-tue/medical-information-to-support-the-decisions-of-tuecs-7">https://www.wada-ama.org/en/resources/therapeutic-use-</a> | Not a CPG.                     |
| 22 | <a href="https://www.wada-ama.org/en/resources/therapeutic-use-exemption-tue/medical-information-to-support-the-decisions-of-tuecs-7">exemption-tue/medical-information-to-support-the-decisions-of-tuecs-7</a>                                                                               |                                |
| 23 | World Health Organization. <i>Consolidated guidelines on HIV prevention, diagnosis, treatment and care for key populations</i> . 2014.                                                                                                                                                        | Superseded (2016 version       |
| 24 | <a href="http://apps.who.int/iris/bitstream/10665/128048/1/9789241507431_eng.pdf?ua=1">http://apps.who.int/iris/bitstream/10665/128048/1/9789241507431_eng.pdf?ua=1</a>                                                                                                                       | included).                     |
| 25 | World Health Organization. <i>Guidelines on HIV self-testing and partner notification: supplement to consolidated guidelines on HIV testing services</i> . 2016.                                                                                                                              | No TG specific recommendation. |
| 26 | <a href="https://www.who.int/hiv/pub/vct/hiv-self-testing-guidelines/en/">https://www.who.int/hiv/pub/vct/hiv-self-testing-guidelines/en/</a>                                                                                                                                                 |                                |
| 27 | World Health Organization. <i>Preventing Suicide A Community Engagement Toolkit</i> . 2018.                                                                                                                                                                                                   | Not a CPG. No TG specific      |
| 28 | <a href="https://apps.who.int/iris/bitstream/handle/10665/272860/9789241513791-eng.pdf">https://apps.who.int/iris/bitstream/handle/10665/272860/9789241513791-eng.pdf</a>                                                                                                                     | recommendation.                |
| 29 | World Health Organization. <i>Priority interventions: HIV/AIDS prevention, treatment and care in the health sector</i> . 2010.                                                                                                                                                                | Not a CPG.                     |
| 30 | <a href="https://www.who.int/hiv/pub/guidelines/9789241500234/en/">https://www.who.int/hiv/pub/guidelines/9789241500234/en/</a>                                                                                                                                                               |                                |
| 31 | Wright E, Grulich A, Roy K, <i>et al.</i> Australasian Society for HIV, Viral Hepatitis and Sexual Health Medicine HIV pre-exposure prophylaxis: clinical                                                                                                                                     | Single country.                |
| 32 | guidelines. Update April 2018. <i>J virus Erad</i> 2018; <b>4</b> :143–59. <a href="http://www.ncbi.nlm.nih.gov/pubmed/30050676">http://www.ncbi.nlm.nih.gov/pubmed/30050676</a>                                                                                                              |                                |
| 33 | Wylie K, Barrett J, Besser M, <i>et al.</i> Good Practice Guidelines for the Assessment and Treatment of Adults with Gender Dysphoria. <i>Sex Relatsh Ther</i>                                                                                                                                | Single country.                |
| 34 | 2014; <b>29</b> :154–214. doi:10.1080/14681994.2014.883353                                                                                                                                                                                                                                    |                                |
| 35 | Yeung H, Luk KM, Chen SC, <i>et al.</i> Dermatologic care for lesbian, gay, bisexual, and transgender persons: Epidemiology, screening, and disease                                                                                                                                           | Not a CPG. Single country.     |
| 36 | prevention. <i>J Am Acad Dermatol</i> 2019; <b>80</b> :591–602. doi:10.1016/j.jaad.2018.02.045                                                                                                                                                                                                |                                |

36 **Key:** CPG = clinical practice guideline; TG = trans people/gender minority

## W4: Extracted sentences relating to mortality or quality of life with associated references from Clinical Practice

### Guidelines

|                                                                                                                                                                                                                                                       | Author (yr)           | In-text statement on Mortality/ Quality of Life (QoL)                                                                                                                                                                                                                                                                                                                                                                                                                                                                                                                                                                                                                                                                                                                                                                                                                                                                                                                                                                                                                                                                                                                                                                                                                                                                                                                                                                                                                                                                                                                                                                                                                                                                                                                                                                                                                                                                                                                                                                                                                                                                                                                                                                                                                                                                                                                                                                                                                                                                                                                                                                                                                                                                                                                                                                                     | Page    | References                                                                                                                                                                                                                                                                                                                                                                                                                                                      |
|-------------------------------------------------------------------------------------------------------------------------------------------------------------------------------------------------------------------------------------------------------|-----------------------|-------------------------------------------------------------------------------------------------------------------------------------------------------------------------------------------------------------------------------------------------------------------------------------------------------------------------------------------------------------------------------------------------------------------------------------------------------------------------------------------------------------------------------------------------------------------------------------------------------------------------------------------------------------------------------------------------------------------------------------------------------------------------------------------------------------------------------------------------------------------------------------------------------------------------------------------------------------------------------------------------------------------------------------------------------------------------------------------------------------------------------------------------------------------------------------------------------------------------------------------------------------------------------------------------------------------------------------------------------------------------------------------------------------------------------------------------------------------------------------------------------------------------------------------------------------------------------------------------------------------------------------------------------------------------------------------------------------------------------------------------------------------------------------------------------------------------------------------------------------------------------------------------------------------------------------------------------------------------------------------------------------------------------------------------------------------------------------------------------------------------------------------------------------------------------------------------------------------------------------------------------------------------------------------------------------------------------------------------------------------------------------------------------------------------------------------------------------------------------------------------------------------------------------------------------------------------------------------------------------------------------------------------------------------------------------------------------------------------------------------------------------------------------------------------------------------------------------------|---------|-----------------------------------------------------------------------------------------------------------------------------------------------------------------------------------------------------------------------------------------------------------------------------------------------------------------------------------------------------------------------------------------------------------------------------------------------------------------|
| 1<br>2<br>3<br>4<br>5<br>6<br>7<br>8<br>9<br>10<br>11<br>12<br>13<br>14<br>15<br>16<br>17<br>18<br>19<br>20<br>21<br>22<br>23<br>24<br>25<br>26<br>27<br>28<br>29<br>30<br>31<br>32<br>33<br>34<br>35<br>36<br>37<br>38<br>39<br>40<br>41<br>42<br>43 | Coleman et al. (2012) | <p><b>Mortality:</b> Two long-term observational studies, both retrospective, compared the mortality &amp; psychiatric morbidity of transsexual adults to those of general population samples (Asscheman et al., 2011; Dhejne et al., 2011). An analysis of data from the Swedish National Board of Health &amp; Welfare information registry found that individuals who had received sex reassignment surgery (191 MtF &amp; 133 FtM) had significantly higher rates of mortality, suicide, suicidal behavior, &amp; psychiatric morbidity than those for a nontranssexual control group matched on age, immigrant status, prior psychiatric morbidity, &amp; birth sex (Dhejne et al., 2011). Similarly, a study in the Netherlands reported a higher total mortality rate, including incidence of suicide, in both pre- &amp; post-surgery transsexual patients (966 MtF and 365 FtF) than in the general population of that country (Asscheman et al., 2011). Neither of these studies questioned the efficacy of sex reassignment; indeed, both lacked an adequate comparison group of transsexuals who either did not receive treatment or who received treatment other than genital surgery. Moreover, transsexual people in these studies were treated as far back as the 1970s. However, these findings do emphasize the need to have good long-term psychological &amp; psychiatric care available for this population. More studies are needed that focus on the outcomes of current assessment &amp; treatment approaches for gender dysphoria.</p> <p><b>QoL:</b> One troubling report (Newfield et al., 2006) documented lower scores on QoL (measured with the SF-36) for FtM patients than for the general population. A weakness of that study is that it recruited its 384 participants by a general email rather than a systematic approach, and the degree and type of treatment were not recorded. Study participants who were taking testosterone had typically been doing so for less than 5 years. Reported QoL was higher for patients who had undergone breast/chest surgery than for those who had not (<math>p &lt; .001</math>). (A similar analysis was not done for genital surgery.)</p> <p><b>QoL:</b> In other work, Kuhn &amp; colleagues (2009) used the King's Health Questionnaire to assess the quality of life of 55 transsexual patients at 15 years after surgery. Scores were compared to those of 20 healthy female control patients who had undergone abdominal/pelvic surgery in the past. Quality of life scores for transsexual patients were the same or better than those of control patients for some subscales (emotions, sleep, incontinence, symptom severity, and role limitation), but worse in other domains (general health, physical limitation, and personal limitation).</p> | 108     | <p>Asscheman H, Giltay EJ, Megens JAJ, et al. A long-term follow-up study of mortality in transsexuals receiving treatment with cross-sex hormones. <i>Eur J Endocrinol</i> 2011;<b>164</b>:635–42. doi:10.1530/EJE-10-1038</p> <p>Dhejne C, Lichtenstein P, Boman M, et al. Long-Term Follow-Up of Transsexual Persons Undergoing Sex Reassignment Surgery: Cohort Study in Sweden. <i>PLoS One</i> 2011;<b>6</b>:e16885. doi:10.1371/journal.pone.0016885</p> |
| 44<br>45<br>46<br>47                                                                                                                                                                                                                                  | Davies et al. (2015)  | <p><b>QoL:</b> A number of studies indicate that speech-therapy intervention is useful in helping gender nonconforming individuals portray their gender identity through speech (Carew, Dacakis, &amp; Oates, 2007; Dacakis, Oates, &amp; Douglas, 2012; Gelfer &amp; Tice, 2013; Hancock &amp; Garabedian, 2013; Meszaros et al., 2005). Such changes to communication are not simply superficial; they can reduce gender dysphoria and improve mental health and quality of life.</p>                                                                                                                                                                                                                                                                                                                                                                                                                                                                                                                                                                                                                                                                                                                                                                                                                                                                                                                                                                                                                                                                                                                                                                                                                                                                                                                                                                                                                                                                                                                                                                                                                                                                                                                                                                                                                                                                                                                                                                                                                                                                                                                                                                                                                                                                                                                                                   | 117-118 | <p>Carew L, Dacakis G, Oates J. The Effectiveness of Oral Resonance Therapy on the Perception of Femininity of Voice in Male-to-Female Transsexuals. <i>J Voice</i> 2007;<b>21</b>:591–603. doi:10.1016/j.jvoice.2006.05.005</p> <p>Dacakis G, Oates J, Douglas J. Beyond voice. <i>Curr Opin</i></p>                                                                                                                                                           |



1  
2  
3  
4  
5  
6  
7  
8  
9  
10  
11  
12  
13  
14  
15  
16  
17  
18  
19  
20  
21  
22  
23  
24  
25  
26  
27  
28  
29  
30  
31  
32  
33  
34  
35  
36  
37  
38  
39  
40  
41  
42  
43  
44  
45  
46  
47

|                    |                                                                                                                                                                                                                                                                                                                                                                                                                                                                                                                                                                                                                                                                                                                                                                                                                                                                                                                                                                                                                                                                                                                       |                                                                                                                                                                                                                                                                                                                                                                                                                                                                                                                                                                                                                                                                                                                                                                                                                                                                                                                                                             |
|--------------------|-----------------------------------------------------------------------------------------------------------------------------------------------------------------------------------------------------------------------------------------------------------------------------------------------------------------------------------------------------------------------------------------------------------------------------------------------------------------------------------------------------------------------------------------------------------------------------------------------------------------------------------------------------------------------------------------------------------------------------------------------------------------------------------------------------------------------------------------------------------------------------------------------------------------------------------------------------------------------------------------------------------------------------------------------------------------------------------------------------------------------|-------------------------------------------------------------------------------------------------------------------------------------------------------------------------------------------------------------------------------------------------------------------------------------------------------------------------------------------------------------------------------------------------------------------------------------------------------------------------------------------------------------------------------------------------------------------------------------------------------------------------------------------------------------------------------------------------------------------------------------------------------------------------------------------------------------------------------------------------------------------------------------------------------------------------------------------------------------|
|                    |                                                                                                                                                                                                                                                                                                                                                                                                                                                                                                                                                                                                                                                                                                                                                                                                                                                                                                                                                                                                                                                                                                                       | <p><i>Otolaryngol Head Neck Surg</i> 2012;<b>20</b>:165–70. doi:10.1097/MOO.0b013e3283530f85</p> <p>Gelfer MP, Tice RM. Perceptual and Acoustic Outcomes of Voice Therapy for Male-to-Female Transgender Individuals Immediately After Therapy and 15 Months Later. <i>J Voice</i> 2013;<b>27</b>:335–47. doi:10.1016/j.jvoice.2012.07.009</p> <p>Hancock AB, Garabedian LM. Transgender voice and communication treatment: a retrospective chart review of 25 cases. <i>Int J Lang Commun Disord</i> 2013;<b>48</b>:54–65. doi:10.1111/j.1460-6984.2012.00185.x</p> <p>Mészáros K, Csokonai Vitéz L, Szabolcs I, et al. Efficacy of Conservative Voice Treatment in Male-to-Female Transsexuals. <i>Folia Phoniatr Logop</i> 2005;<b>57</b>:111–8. doi:10.1159/000083572</p> <p>* Hancock AB, Krissinger J, Owen K. Voice Perceptions and Quality of Life of Transgender People. <i>J Voice</i> 2011;<b>25</b>:553–8. doi:10.1016/j.jvoice.2010.07.013</p> |
| <p>ECDC (2018)</p> | <p><b>Mortality:</b> the World Health Organization (WHO) and UNAIDS have identified several targets along the continuum of care for hepatitis B virus (HBV), hepatitis C virus (HCV) and HIV. These <i>include</i> promoting early diagnosis, scaling up treatment and reducing disease-related mortality [12,13].</p> <p><b>QoL (as QALY):</b> Since then, the feasibility of birth cohort testing for HCV has been studied in several European countries, including Ireland, Italy, and Spain [87–89]. In the studies in Ireland and Spain, the authors concluded that to effectively implement birth cohort testing for HCV, each country must determine its own HCV seroprevalence by year in order to successfully develop screening recommendations because risk factors, particularly injecting drug use, can affect the selection of birth cohort. In Italy, authors found that the anti-HCV screening program had an acceptable expenditure increase for the National Health Service compared to the cost per quality-adjusted life year (QALY) of other approved interventions or treatments in Italy."</p> | <p>3</p> <p>12. World Health Organization. Global health sector strategy on viral hepatitis 2016–2021: towards ending viral hepatitis. Geneva: WHO; 2016.</p> <p>13. World Health Organization. Global health sector strategy on HIV, 2016–2021: towards ending AIDS. Geneva: WHO; 2016.</p> <p>18</p> <p>87. Group HCSGD. Background to recommendation 20: general population or birth cohort screening. Dublin: Health Protection Surveillance Centre; 2017.</p> <p>88. Ruggeri M, Coretti S, Gasbarrini A, Cicchetti A. Economic assessment of an anti-HCV screening program in Italy. <i>Value Health</i>. 2013;16(6):965–72.</p> <p>89. Mena A, Moldes L, Meijide H, Canizares A, Castro-Iglesias A, Delgado M, et al. Seroprevalence of HCV and HIV infections by year of birth in Spain: impact of US CDC and USPSTF recommendations for HCV and HIV testing. <i>PLoS ONE</i>. 2014;9(12):e113062.</p>                                               |
|                    | <p><b>QALY:</b> Four cost implication studies of HIV testing in hospital settings have been conducted in UK. They show that universal offer testing was highly cost effective if future healthcare costs &amp; QALYs are incorporated into calculations [236-239]</p>                                                                                                                                                                                                                                                                                                                                                                                                                                                                                                                                                                                                                                                                                                                                                                                                                                                 | <p>23</p> <p>236. Ong KJ, Thornton AC, Fisher M, Hutt R, Nicholson S, Palfreeman A, et al. Estimated cost per HIV infection diagnosed through routine HIV testing offered in acute general medical admission units and general practice settings in England. <i>HIV Medicine</i>. 2016;17(4):247-54.</p> <p>237. Pizzo E, Rayment M, Thornton A, Rae C, Hartney T, Delpech V, et al. Cost-effectiveness analysis of HIV testing in non-traditional settings-the HINTS study. <i>HIV Medicine</i>. 2014;15:93.</p> <p>238. Sewell J, Capocci S, Johnson J, Solamalai A, Hopkins S, Cropley I, et al. Expanded blood borne virus testing in a</p>                                                                                                                                                                                                                                                                                                             |

|    |   |                        |                                                                                                                                                                                                                                                                                                                 |      |                                                                                                                                                                                                |
|----|---|------------------------|-----------------------------------------------------------------------------------------------------------------------------------------------------------------------------------------------------------------------------------------------------------------------------------------------------------------|------|------------------------------------------------------------------------------------------------------------------------------------------------------------------------------------------------|
| 1  |   |                        |                                                                                                                                                                                                                                                                                                                 |      | tuberculosis clinic. A cost and yield analysis. <i>J Infect.</i> 2015;70(4):317-23.                                                                                                            |
| 2  |   |                        |                                                                                                                                                                                                                                                                                                                 |      | 239. Alexander H, Brady M, Poulton M. A calculation of the financial impact of opt-out HIV testing in a London Emergency Department (ED). <i>HIV Med.</i> 2016 April.                          |
| 3  |   |                        |                                                                                                                                                                                                                                                                                                                 |      |                                                                                                                                                                                                |
| 4  |   |                        |                                                                                                                                                                                                                                                                                                                 |      |                                                                                                                                                                                                |
| 5  |   |                        |                                                                                                                                                                                                                                                                                                                 |      |                                                                                                                                                                                                |
| 6  |   |                        |                                                                                                                                                                                                                                                                                                                 |      |                                                                                                                                                                                                |
| 7  | 4 | Gilligan et al. (2017) | <b>Mortality/QoL:</b> no statements linked to references                                                                                                                                                                                                                                                        |      |                                                                                                                                                                                                |
| 8  |   |                        |                                                                                                                                                                                                                                                                                                                 |      |                                                                                                                                                                                                |
| 9  | 5 | Hembree et al. (2017)  | <b>Mortality:</b> Long-term studies from The Netherlands found no increased risk for cardiovascular mortality (161). ... The largest cohort of transgender females (mean age 41 years, followed for a mean of 10 years) showed no increase in cardiovascular mortality despite a 32% rate of tobacco use (161). | 3891 | 161. van Kesteren PJM, Asscheman H, Megens JAJ, Gooren LJG. Mortality and morbidity in transsexual subjects treated with cross-sex hormones. <i>Clin Endocrinol (Oxf).</i> 1997;47(3):337-343. |
| 10 |   |                        |                                                                                                                                                                                                                                                                                                                 |      |                                                                                                                                                                                                |
| 11 |   |                        |                                                                                                                                                                                                                                                                                                                 |      |                                                                                                                                                                                                |
| 12 |   |                        |                                                                                                                                                                                                                                                                                                                 |      |                                                                                                                                                                                                |
| 13 |   |                        |                                                                                                                                                                                                                                                                                                                 |      |                                                                                                                                                                                                |
| 14 |   |                        |                                                                                                                                                                                                                                                                                                                 |      |                                                                                                                                                                                                |
| 15 |   |                        |                                                                                                                                                                                                                                                                                                                 |      |                                                                                                                                                                                                |
| 16 |   |                        |                                                                                                                                                                                                                                                                                                                 |      |                                                                                                                                                                                                |
| 17 |   |                        |                                                                                                                                                                                                                                                                                                                 |      |                                                                                                                                                                                                |
| 18 |   |                        |                                                                                                                                                                                                                                                                                                                 |      |                                                                                                                                                                                                |
| 19 |   |                        |                                                                                                                                                                                                                                                                                                                 |      |                                                                                                                                                                                                |
| 20 |   |                        |                                                                                                                                                                                                                                                                                                                 |      |                                                                                                                                                                                                |
| 21 |   |                        |                                                                                                                                                                                                                                                                                                                 |      |                                                                                                                                                                                                |
| 22 |   |                        |                                                                                                                                                                                                                                                                                                                 |      |                                                                                                                                                                                                |
| 23 |   |                        |                                                                                                                                                                                                                                                                                                                 |      |                                                                                                                                                                                                |
| 24 |   |                        |                                                                                                                                                                                                                                                                                                                 |      |                                                                                                                                                                                                |
| 25 |   |                        |                                                                                                                                                                                                                                                                                                                 |      |                                                                                                                                                                                                |
| 26 |   |                        |                                                                                                                                                                                                                                                                                                                 |      |                                                                                                                                                                                                |
| 27 |   |                        |                                                                                                                                                                                                                                                                                                                 |      |                                                                                                                                                                                                |
| 28 |   |                        |                                                                                                                                                                                                                                                                                                                 |      |                                                                                                                                                                                                |
| 29 |   |                        |                                                                                                                                                                                                                                                                                                                 |      |                                                                                                                                                                                                |
| 30 |   |                        |                                                                                                                                                                                                                                                                                                                 |      |                                                                                                                                                                                                |
| 31 |   |                        |                                                                                                                                                                                                                                                                                                                 |      |                                                                                                                                                                                                |
| 32 |   |                        |                                                                                                                                                                                                                                                                                                                 |      |                                                                                                                                                                                                |
| 33 |   |                        |                                                                                                                                                                                                                                                                                                                 |      |                                                                                                                                                                                                |
| 34 |   |                        |                                                                                                                                                                                                                                                                                                                 |      |                                                                                                                                                                                                |
| 35 |   |                        |                                                                                                                                                                                                                                                                                                                 |      |                                                                                                                                                                                                |
| 36 |   |                        |                                                                                                                                                                                                                                                                                                                 |      |                                                                                                                                                                                                |
| 37 |   |                        |                                                                                                                                                                                                                                                                                                                 |      |                                                                                                                                                                                                |
| 38 |   |                        |                                                                                                                                                                                                                                                                                                                 |      |                                                                                                                                                                                                |
| 39 |   |                        |                                                                                                                                                                                                                                                                                                                 |      |                                                                                                                                                                                                |
| 40 |   |                        |                                                                                                                                                                                                                                                                                                                 |      |                                                                                                                                                                                                |
| 41 |   |                        |                                                                                                                                                                                                                                                                                                                 |      |                                                                                                                                                                                                |
| 42 |   |                        |                                                                                                                                                                                                                                                                                                                 |      |                                                                                                                                                                                                |
| 43 |   |                        |                                                                                                                                                                                                                                                                                                                 |      |                                                                                                                                                                                                |
| 44 |   |                        |                                                                                                                                                                                                                                                                                                                 |      |                                                                                                                                                                                                |
| 45 |   |                        |                                                                                                                                                                                                                                                                                                                 |      |                                                                                                                                                                                                |
| 46 |   |                        |                                                                                                                                                                                                                                                                                                                 |      |                                                                                                                                                                                                |
| 47 |   |                        |                                                                                                                                                                                                                                                                                                                 |      |                                                                                                                                                                                                |

1

2

3

4

5

6

7

8

9

10

11

12

13

14

15

16

17

18

19

20

21

22

23

24

25

26

27

28

29

30

31

32

33

34

35

36

37

38

39

40

41

42

43

44

45

46

47

48

49

50

51

52

53

54

55

56

57

58

|      |                      |                                                                                                                                                                                                                                                                                   |     |                                                                                                                                                                                                                                                                                                                                                                                                                                                                                                                                                                      |
|------|----------------------|-----------------------------------------------------------------------------------------------------------------------------------------------------------------------------------------------------------------------------------------------------------------------------------|-----|----------------------------------------------------------------------------------------------------------------------------------------------------------------------------------------------------------------------------------------------------------------------------------------------------------------------------------------------------------------------------------------------------------------------------------------------------------------------------------------------------------------------------------------------------------------------|
|      |                      | <b>Mortality:</b> Community-located ART distribution is a cost-effective service delivery model whose rates of attrition and mortality are similar to those at the facility level. (195,196)                                                                                      | 10  | 195. Kredt T, Ford N, Adeniyi FB, Garner P. Decentralising HIV treatment in lower- and middle-income countries. <i>Cochrane Database Syst Rev.</i> 2013;6:CD009987.<br>196. Chu C, Umanski G, Blank A, Grossberg R, Selwyn PA. HIVinfected patients and treatment outcomes: an equivalence study of community-located, primary care-based HIV treatment vs. hospital-based specialty care in the Bronx, New York. <i>AIDS Care.</i> 2010;22(12):1522–1529.                                                                                                           |
|      |                      | <b>Mortality</b> In Uganda, ART distribution at community-based sites was found to be associated with significantly higher rates of retention in care and lower mortality rates. (88, 204)                                                                                        | 10  | 88. Wamboga Magawa J, Mpiima D. Community ART Delivery Model for High Retention of Patients on Antiretroviral Therapy: The AIDS Support Organisation (TASO) Operational Research Findings East and Central Uganda, Resource-Limited Setting. Presented at: 7th IAS Conference on HIV Pathogenesis, Treatment and Prevention; June 30-July 3, 2013; Kuala Lumpur, Malaysia.<br>204. Grimsrud A, Patten G, Sharp J, Myer L, Wilkinson L, Bekker LG. Extending dispensing intervals for stable patients on ART. <i>J Acquir Immune Defic Syndr.</i> 2014;66(2):e58–e60. |
|      |                      | <b>Mortality /QoL:</b> Today, a person diagnosed with HIV at the age of 20 years if started promptly on ART is expected to live a normal life span, with a highly preserved quality of life.(1)                                                                                   | 1   | 1. Samji H, Cescon A, Hogg RS, et al. Closing the gap: increases in life expectancy among treated HIV-positive individuals in the United States and Canada. <i>PLoS One.</i> 2013; 8(12):e81355.                                                                                                                                                                                                                                                                                                                                                                     |
|      |                      | <b>QoL:</b> Stigma can negatively shape quality of life, affect mental health, and influence ART use and outcomes.<br><b>QoL:</b> Mental health disorders such as these can result in a poorer quality of life and negatively affect access to and use of HIV services."          | 5   | No linked reference                                                                                                                                                                                                                                                                                                                                                                                                                                                                                                                                                  |
|      |                      | <b>QoL:</b> Impact of actions taken to reduce stigma & discrimination & address mental health from a quality-of-life perspective (eg, interventions and programs) on these issues as well as on HIV-related health outcomes.                                                      | 18  | No linked reference                                                                                                                                                                                                                                                                                                                                                                                                                                                                                                                                                  |
| 297  | Ralph et al (2010)   | <b>Mortality/QoL:</b> no statements linked to references                                                                                                                                                                                                                          |     |                                                                                                                                                                                                                                                                                                                                                                                                                                                                                                                                                                      |
| 318  | Strang et al (2016)  | <b>Mortality/QoL:</b> no statements linked to references                                                                                                                                                                                                                          |     |                                                                                                                                                                                                                                                                                                                                                                                                                                                                                                                                                                      |
| 339  | T'Sjoen et al (2020) | <b>QoL:</b> Although the quality of sexual life improves after GAMI, research has demonstrated that it does not reach the levels of cisgender people.(44)                                                                                                                         | 575 | 44. Nobili A, Glazebrook C, Arcelus J. Quality of life of treatment seeking transgender adults: a systematic review and metaanalysis. <i>Rev Endocr Metab Disord</i> 2018;19:199-220.                                                                                                                                                                                                                                                                                                                                                                                |
|      |                      | <b>QoL:</b> Overall results lean toward favorable sexual outcomes after genital surgeries in trans people, although research into the quality of sexual life in the trans population after GAMI is limited.(44)                                                                   | 580 | 44. Nobili A, Glazebrook C, Arcelus J. Quality of life of treatment seeking transgender adults: a systematic review and metaanalysis. <i>Rev Endocr Metab Disord</i> 2018;19:199-220.                                                                                                                                                                                                                                                                                                                                                                                |
| 3910 | WHO (2011)           | <b>Mortality:</b> A systematic literature search was conducted on the role of HTC in reducing HIV-related morbidity and mortality, compared with the provision of basic information on HIV prevention and care. The surrogate outcomes were behavioural change and HIV incidence. | 39  | No direct reference, appears to relate to the systematic review                                                                                                                                                                                                                                                                                                                                                                                                                                                                                                      |

|    |            |                                                                                                                                                                                                                                                                                                                                                                                                                                                                                                                                                                                                            |    |                                                                                                                                                                                                                                                                                                                                                                                                                                                            |
|----|------------|------------------------------------------------------------------------------------------------------------------------------------------------------------------------------------------------------------------------------------------------------------------------------------------------------------------------------------------------------------------------------------------------------------------------------------------------------------------------------------------------------------------------------------------------------------------------------------------------------------|----|------------------------------------------------------------------------------------------------------------------------------------------------------------------------------------------------------------------------------------------------------------------------------------------------------------------------------------------------------------------------------------------------------------------------------------------------------------|
| 1  |            |                                                                                                                                                                                                                                                                                                                                                                                                                                                                                                                                                                                                            |    |                                                                                                                                                                                                                                                                                                                                                                                                                                                            |
| 2  |            | <b>Mortality:</b> Alcohol and substance use/dependence is a problem for many MSM and transgender people, and is linked to significant morbidity and mortality.(52)                                                                                                                                                                                                                                                                                                                                                                                                                                         | 53 | 52. Stall R et al. Alcohol use, drug use and alcohol-related problems among men who have sex with men: the Urban Men's Health Study. <i>Addiction</i> , 2001, 96:1589–1601.                                                                                                                                                                                                                                                                                |
| 3  |            |                                                                                                                                                                                                                                                                                                                                                                                                                                                                                                                                                                                                            |    |                                                                                                                                                                                                                                                                                                                                                                                                                                                            |
| 4  |            |                                                                                                                                                                                                                                                                                                                                                                                                                                                                                                                                                                                                            |    |                                                                                                                                                                                                                                                                                                                                                                                                                                                            |
| 5  |            | <b>Mortality:</b> OST has been demonstrated to improve both access and adherence to ART, and reduce mortality.(120)                                                                                                                                                                                                                                                                                                                                                                                                                                                                                        | 54 | 120. WHO, UNODC, UNAIDS. <i>Technical guide for countries to set targets for universal access to HIV prevention, treatment and care for injecting drug users, including access to needle syringe programmes</i> . Geneva, WHO, 2009. <a href="http://www.unodc.org/documents/hiv-aids/idu_target_setting_guide.pdf">http://www.unodc.org/documents/hiv-aids/idu_target_setting_guide.pdf</a> (accessed 13 April 2011).                                     |
| 6  |            |                                                                                                                                                                                                                                                                                                                                                                                                                                                                                                                                                                                                            |    |                                                                                                                                                                                                                                                                                                                                                                                                                                                            |
| 7  |            |                                                                                                                                                                                                                                                                                                                                                                                                                                                                                                                                                                                                            |    |                                                                                                                                                                                                                                                                                                                                                                                                                                                            |
| 8  |            |                                                                                                                                                                                                                                                                                                                                                                                                                                                                                                                                                                                                            |    |                                                                                                                                                                                                                                                                                                                                                                                                                                                            |
| 9  |            |                                                                                                                                                                                                                                                                                                                                                                                                                                                                                                                                                                                                            |    |                                                                                                                                                                                                                                                                                                                                                                                                                                                            |
| 10 |            |                                                                                                                                                                                                                                                                                                                                                                                                                                                                                                                                                                                                            |    |                                                                                                                                                                                                                                                                                                                                                                                                                                                            |
| 11 |            | <b>Mortality:</b> Antiretroviral therapy (ART) is the core pharmacological component of a broad and comprehensive management of HIV infection. ART has significantly decreased the morbidity and mortality from HIV in the past decades. Given that ART represents a biologically targeted intervention, where sexual identities play a minimal role or no role at all on expected effects, there is no reason, biological or other, to differentiate ART recommendations for MSM and transgender people from those formulated for other populations (excluding HIV-infected pregnant women and newborns). | 57 | No direct reference, appears to come from the systematic review                                                                                                                                                                                                                                                                                                                                                                                            |
| 12 |            |                                                                                                                                                                                                                                                                                                                                                                                                                                                                                                                                                                                                            |    |                                                                                                                                                                                                                                                                                                                                                                                                                                                            |
| 13 |            |                                                                                                                                                                                                                                                                                                                                                                                                                                                                                                                                                                                                            |    |                                                                                                                                                                                                                                                                                                                                                                                                                                                            |
| 14 |            |                                                                                                                                                                                                                                                                                                                                                                                                                                                                                                                                                                                                            |    |                                                                                                                                                                                                                                                                                                                                                                                                                                                            |
| 15 |            |                                                                                                                                                                                                                                                                                                                                                                                                                                                                                                                                                                                                            |    |                                                                                                                                                                                                                                                                                                                                                                                                                                                            |
| 16 |            |                                                                                                                                                                                                                                                                                                                                                                                                                                                                                                                                                                                                            |    |                                                                                                                                                                                                                                                                                                                                                                                                                                                            |
| 17 |            |                                                                                                                                                                                                                                                                                                                                                                                                                                                                                                                                                                                                            |    |                                                                                                                                                                                                                                                                                                                                                                                                                                                            |
| 18 |            | <b>QoL:</b> There was no evidence available on issues of quality of life such as inconvenience or decreased desire; however, the values and preferences of the MSM polled by MSMGF showed support for this intervention.(66)                                                                                                                                                                                                                                                                                                                                                                               | 33 | 66 Arreola S et al. <i>In our own words: preferences, values, and perspectives on HIV prevention and treatment – a civil society consultation with men who have sex with men and transgender people</i> . Oakland, California, The Global Forum on MSM and HIV (MSMGF), 2010. <a href="http://msmgf.org/files/msmgf/About_Us/Publications/WHO_Report_1.pdf">http://msmgf.org/files/msmgf/About_Us/Publications/WHO_Report_1.pdf</a> (accessed 19 May 2011) |
| 19 |            |                                                                                                                                                                                                                                                                                                                                                                                                                                                                                                                                                                                                            |    |                                                                                                                                                                                                                                                                                                                                                                                                                                                            |
| 20 |            |                                                                                                                                                                                                                                                                                                                                                                                                                                                                                                                                                                                                            |    |                                                                                                                                                                                                                                                                                                                                                                                                                                                            |
| 21 |            |                                                                                                                                                                                                                                                                                                                                                                                                                                                                                                                                                                                                            |    |                                                                                                                                                                                                                                                                                                                                                                                                                                                            |
| 22 |            |                                                                                                                                                                                                                                                                                                                                                                                                                                                                                                                                                                                                            |    |                                                                                                                                                                                                                                                                                                                                                                                                                                                            |
| 23 |            |                                                                                                                                                                                                                                                                                                                                                                                                                                                                                                                                                                                                            |    |                                                                                                                                                                                                                                                                                                                                                                                                                                                            |
| 24 |            | <b>QoL:</b> No considerations regarding quality of life such as inconvenience or decreased sexual desire were studied.                                                                                                                                                                                                                                                                                                                                                                                                                                                                                     | 35 | No direct reference, appears to come from the systematic review                                                                                                                                                                                                                                                                                                                                                                                            |
| 25 |            |                                                                                                                                                                                                                                                                                                                                                                                                                                                                                                                                                                                                            |    |                                                                                                                                                                                                                                                                                                                                                                                                                                                            |
| 26 |            | <b>QoL:</b> No studies were found with information on issues related to quality of life due to the intervention.                                                                                                                                                                                                                                                                                                                                                                                                                                                                                           | 44 | No direct reference, appears to come from the systematic review                                                                                                                                                                                                                                                                                                                                                                                            |
| 27 |            |                                                                                                                                                                                                                                                                                                                                                                                                                                                                                                                                                                                                            |    |                                                                                                                                                                                                                                                                                                                                                                                                                                                            |
| 28 |            |                                                                                                                                                                                                                                                                                                                                                                                                                                                                                                                                                                                                            |    |                                                                                                                                                                                                                                                                                                                                                                                                                                                            |
| 29 |            | <b>QoL:</b> Quality of life (inconvenience, unnecessary intervention, anxiety and discrimination) was not measured.                                                                                                                                                                                                                                                                                                                                                                                                                                                                                        | 44 | No direct reference, appears to come from the systematic review                                                                                                                                                                                                                                                                                                                                                                                            |
| 30 |            |                                                                                                                                                                                                                                                                                                                                                                                                                                                                                                                                                                                                            |    |                                                                                                                                                                                                                                                                                                                                                                                                                                                            |
| 31 |            | <b>QoL:</b> None of the studies reported on HIV or STI incidence or quality of life.                                                                                                                                                                                                                                                                                                                                                                                                                                                                                                                       | 46 | No direct reference, appears to come from the systematic review                                                                                                                                                                                                                                                                                                                                                                                            |
| 32 |            |                                                                                                                                                                                                                                                                                                                                                                                                                                                                                                                                                                                                            |    |                                                                                                                                                                                                                                                                                                                                                                                                                                                            |
| 33 |            | <b>QoL:</b> People living with HIV, regardless of ART indication, should also benefit from basic HIV prevention and care, including effective interventions that are simple, relatively inexpensive, improve the quality of life, prevent further transmission of HIV or common opportunistic infections, delay progression of HIV disease and prevent mortality.                                                                                                                                                                                                                                          | 59 | No linked reference                                                                                                                                                                                                                                                                                                                                                                                                                                        |
| 34 |            |                                                                                                                                                                                                                                                                                                                                                                                                                                                                                                                                                                                                            |    |                                                                                                                                                                                                                                                                                                                                                                                                                                                            |
| 35 |            |                                                                                                                                                                                                                                                                                                                                                                                                                                                                                                                                                                                                            |    |                                                                                                                                                                                                                                                                                                                                                                                                                                                            |
| 36 |            |                                                                                                                                                                                                                                                                                                                                                                                                                                                                                                                                                                                                            |    |                                                                                                                                                                                                                                                                                                                                                                                                                                                            |
| 37 | WHO (2012) | <b>QoL (as QALY):</b> Using sexual risk behaviour data from the Partners in Prevention trial (16), the cost per HIV infection averted was between US\$6000 and \$66 000 when PrEP was always used, and the savings per quality-adjusted life year (QALY), a standard measure of cost-benefit, was \$260 to \$4900. Using "more typical" data that assume less risky sexual behaviour, the cost per HIV infection averted was between ~\$0 (break-even) and \$26 000 when PrEP was always used, and the cost per QALY gained was between minus \$200 (cost-                                                 | 7  | 16. Celum C et al. Acyclovir and transmission of HIV-1 from persons infected with HIV-1 and HSV-2. <i>New England Journal of Medicine</i> , 2010, 362(5):427–439.                                                                                                                                                                                                                                                                                          |
| 38 |            |                                                                                                                                                                                                                                                                                                                                                                                                                                                                                                                                                                                                            |    |                                                                                                                                                                                                                                                                                                                                                                                                                                                            |
| 39 |            |                                                                                                                                                                                                                                                                                                                                                                                                                                                                                                                                                                                                            |    |                                                                                                                                                                                                                                                                                                                                                                                                                                                            |
| 40 |            |                                                                                                                                                                                                                                                                                                                                                                                                                                                                                                                                                                                                            |    |                                                                                                                                                                                                                                                                                                                                                                                                                                                            |
| 41 |            |                                                                                                                                                                                                                                                                                                                                                                                                                                                                                                                                                                                                            |    |                                                                                                                                                                                                                                                                                                                                                                                                                                                            |
| 42 |            |                                                                                                                                                                                                                                                                                                                                                                                                                                                                                                                                                                                                            |    |                                                                                                                                                                                                                                                                                                                                                                                                                                                            |

1  
2  
3  
4  
5  
6  
7  
8  
9  
10  
11  
12  
13  
14  
15  
16  
17  
18  
19  
20  
21  
22  
23  
24  
25  
26  
27  
28  
29  
30  
31  
32  
33  
34  
35  
36  
37  
38  
39  
40  
41  
42  
43  
44  
45  
46  
47

|    |            |                                                                                                                                                                                                                                                                                                                                                                                                                                                                                                                                                                                                                                                                                                                                                                                                                                                                                                                                                          |       |                                                                                                                                                                                                                                                                                                                                                                                                                                                                                                                                                                                                                                                                                                                                                                                                                                                                                                                                                                                                                                                                                                                                                                                                                                                    |
|----|------------|----------------------------------------------------------------------------------------------------------------------------------------------------------------------------------------------------------------------------------------------------------------------------------------------------------------------------------------------------------------------------------------------------------------------------------------------------------------------------------------------------------------------------------------------------------------------------------------------------------------------------------------------------------------------------------------------------------------------------------------------------------------------------------------------------------------------------------------------------------------------------------------------------------------------------------------------------------|-------|----------------------------------------------------------------------------------------------------------------------------------------------------------------------------------------------------------------------------------------------------------------------------------------------------------------------------------------------------------------------------------------------------------------------------------------------------------------------------------------------------------------------------------------------------------------------------------------------------------------------------------------------------------------------------------------------------------------------------------------------------------------------------------------------------------------------------------------------------------------------------------------------------------------------------------------------------------------------------------------------------------------------------------------------------------------------------------------------------------------------------------------------------------------------------------------------------------------------------------------------------|
|    |            | saving) and \$1900.                                                                                                                                                                                                                                                                                                                                                                                                                                                                                                                                                                                                                                                                                                                                                                                                                                                                                                                                      |       |                                                                                                                                                                                                                                                                                                                                                                                                                                                                                                                                                                                                                                                                                                                                                                                                                                                                                                                                                                                                                                                                                                                                                                                                                                                    |
|    |            | <b>QoL (as QALY):</b> One cost-effectiveness study in Australia estimated that, if continuous use of PrEP was 90% effective and the program covered only HIV-negative MSM having high-risk sex, it would cost US\$47 745 per QALY gained (18). Another cost-effectiveness study from the USA estimated that if PrEP was 90% effective and the program covered only HIV-negative MSM having high-risk sex, it would cost US\$107 000 per QALY gained (19). If PrEP was 50% effective, it would cost US\$298 000 per QALY gained. Sensitivity analyses showed that the cheaper and more efficacious PrEP is and the more high-risk the population is, the more cost-effective that PrEP would be, with estimates in cost-saving ranging up to over US\$300 000 per QALY gained (20). Overall, cost-effectiveness estimates vary widely, depending on model parameter estimates, including efficacy, cost of PrEP, HIV incidence and age of the population. | 10-11 | 18. Anderson J, Cooper D. Cost-effectiveness of pre-exposure prophylaxis for HIV in an MSM population. <i>HIV Medicine</i> , 2009, 10:39.<br>19. Desai K et al. Modeling the impact of HIV chemoprophylaxis strategies among men who have sex with men in the United States: HIV infections prevented and cost-effectiveness. <i>AIDS</i> , 2008, 22(14):1829–1839.<br>20. Paltiel AD et al. HIV preexposure prophylaxis in the United States: impact on lifetime infection risk, clinical outcomes, and cost-effectiveness. <i>Clinical Infectious Diseases</i> , 2009, 48(6):806–815.                                                                                                                                                                                                                                                                                                                                                                                                                                                                                                                                                                                                                                                            |
| 12 | WHO (2016) | <b>Mortality:</b> Access and adherence to OST can improve health outcomes (4), reduce overdose and resulting mortality (54)                                                                                                                                                                                                                                                                                                                                                                                                                                                                                                                                                                                                                                                                                                                                                                                                                              | 33    | 4. Consolidated guidelines on general HIV care and the use of antiretroviral drugs for treating and preventing HIV infection: recommendations for a public health approach. Geneva, World Health Organization, 2013 and Guideline on when to start antiretroviral therapy and on pre-exposure prophylaxis for HIV. Geneva, WHO, 2015 ( <a href="http://www.who.int/iris/bitstream/10665/85321/1/9789241505727_eng.pdf">http://www.who.int/iris/bitstream/10665/85321/1/9789241505727_eng.pdf</a> , accessed 25 February 2014). and Guideline on when to start antiretroviral therapy and on pre-exposure prophylaxis for HIV. Geneva, WHO, 2015.<br><a href="http://apps.who.int/iris/bitstream/10665/186275/1/9789241509565_eng.pdf?ua=154">http://apps.who.int/iris/bitstream/10665/186275/1/9789241509565_eng.pdf?ua=154</a> . Spire B, Lucas GM, Carrieri MP. Adherence to HIV treatment among IDUs and the role of opioid substitution treatment (OST). <i>International Journal of Drug Policy</i> , 2007, 18(4):262–270 ( <a href="https://www.plhivpreventionresources.org/index.cfm?action=main.abstract&amp;id=1460">https://www.plhivpreventionresources.org/index.cfm?action=main.abstract&amp;id=1460</a> accessed 28 February 2014). |
|    |            | <b>Mortality:</b> Provision of OST before release can help reduce overdose-related mortality (61).                                                                                                                                                                                                                                                                                                                                                                                                                                                                                                                                                                                                                                                                                                                                                                                                                                                       | 35    | 61. Degenhardt L et al. What has been achieved in HIV prevention, treatment and care for people who inject drugs, 2010-2012? A review of the six highest burden countries. <i>International Journal of Drug Policy</i> , 2014, 25:53–60 ( <a href="http://www.sciencedirect.com/science/article/pii/S095539591300128X">http://www.sciencedirect.com/science/article/pii/S095539591300128X</a> , accessed 27 February 2014).                                                                                                                                                                                                                                                                                                                                                                                                                                                                                                                                                                                                                                                                                                                                                                                                                        |
|    |            | <b>Mortality:</b> Completing TB treatment is critical to reducing mortality and avoiding the development and spread of drug-resistant TB. It is vital to provide a supportive, non-judgemental and non-discriminatory environment that enables people from key populations to complete treatment, provides additional adherence support measures to improve treatment outcomes, and reduces the risk of continued TB transmission (65). Timely initiation of ART significantly reduces the risk of mortality from HIV-associated TB.                                                                                                                                                                                                                                                                                                                                                                                                                     | 64    | 65. Policy guidelines for collaborative TB and HIV services for injecting and other drug users: an integrated approach. Geneva, World Health Organization, 2008 (Evidence for Action Technical Papers) ( <a href="http://whqlibdoc.who.int/publications/2008/9789241596930_eng.pdf">http://whqlibdoc.who.int/publications/2008/9789241596930_eng.pdf</a> accessed 25 February 2014). Integrating collaborative TB and HIV services within a comprehensive package of care for people                                                                                                                                                                                                                                                                                                                                                                                                                                                                                                                                                                                                                                                                                                                                                               |

1  
2  
3  
4  
5  
6  
7  
8  
9  
10  
11  
12  
13  
14  
15  
16  
17  
18  
19  
20  
21  
22  
23  
24  
25  
26  
27

|  |                                                                                                                                                                                                                                                                                                                                                                                    |    |                                                                                                                                                                                                                                                                                                                                                                                                                                                                                                                                                                                                                                                                                                                                                                                                                          |
|--|------------------------------------------------------------------------------------------------------------------------------------------------------------------------------------------------------------------------------------------------------------------------------------------------------------------------------------------------------------------------------------|----|--------------------------------------------------------------------------------------------------------------------------------------------------------------------------------------------------------------------------------------------------------------------------------------------------------------------------------------------------------------------------------------------------------------------------------------------------------------------------------------------------------------------------------------------------------------------------------------------------------------------------------------------------------------------------------------------------------------------------------------------------------------------------------------------------------------------------|
|  |                                                                                                                                                                                                                                                                                                                                                                                    |    | who inject drugs.- Consolidated guidelines. Geneva, WHO, 2016. <a href="http://www.who.int/tb/publications/integrating-collaborative-tb-and-hiv_services_for_pwid/en/">http://www.who.int/tb/publications/integrating-collaborative-tb-and-hiv_services_for_pwid/en/</a>                                                                                                                                                                                                                                                                                                                                                                                                                                                                                                                                                 |
|  | <b>Mortality:</b> Among those living with HIV who are coinfecting with HBV or HCV, liver disease progresses more rapidly and mortality is greater than among those with HBV or HCV who are not living with HIV.                                                                                                                                                                    | 67 | No linked reference                                                                                                                                                                                                                                                                                                                                                                                                                                                                                                                                                                                                                                                                                                                                                                                                      |
|  | <b>Mortality:</b> Coinfection with HIV and HCV accelerates HCV-related progression of liver fibrosis and leads to a higher rate of end-stage liver disease and mortality (121, 151, 157).                                                                                                                                                                                          | 68 | 121. Benhamou Y et al. Liver fibrosis progression in human immunodeficiency virus and hepatitis C virus coinfecting patients. <i>Hepatology</i> , 1999, 30:1054–1058.<br>151. Deng LP et al. Impact of human immunodeficiency virus infection on the course of hepatitis C virus infection: a meta-analysis. <i>World Journal of Gastroenterology</i> , 2009, 15:996–1003.<br>157. Pineda JA et al. HIV coinfection shortens the survival of patients with hepatitis C virus-related decompensated cirrhosis. <i>Hepatology</i> , 2005, 41:779–789.                                                                                                                                                                                                                                                                      |
|  | <b>Mortality:</b> These effects may be magnified in low-income and food-insecure contexts, such as those experienced by many key populations. In turn, poor nutritional status can hasten the progression of HIV disease; low body mass index (BMI) in adults (BMI less than 18.5 kg/m <sup>2</sup> ) is an independent risk factor for HIV disease progression and mortality (4). | 73 | 4. Consolidated guidelines on general HIV care and the use of antiretroviral drugs for treating and preventing HIV infection: recommendations for a public health approach. Geneva, World Health Organization, 2013 and Guideline on when to start antiretroviral therapy and on pre-exposure prophylaxis for HIV. Geneva, WHO, 2015 ( <a href="http://www.who.int/iris/bitstream/10665/85321/1/9789241505727_eng.pdf">http://www.who.int/iris/bitstream/10665/85321/1/9789241505727_eng.pdf</a> , accessed 25 February 2014). and Guideline on when to start antiretroviral therapy and on pre-exposure prophylaxis for HIV. Geneva, WHO, 2015. <a href="http://apps.who.int/iris/bitstream/10665/186275/1/9789241509565_eng.pdf?ua=1">http://apps.who.int/iris/bitstream/10665/186275/1/9789241509565_eng.pdf?ua=1</a> |

**Key:** ART, antiretroviral therapy; GAMI, gender affirming medical intervention; HIV, human immunodeficiency virus; HTC, HIV testing and counselling; MSM, men who have sex with men; OST, opiate substitution therapy; PrEP, pre-exposure prophylaxis; QALY, Quality-Adjusted Life Year; TB, tuberculosis; \* Reference appears in reference list, but not in the main text; \*\* We believe there is an error here and that the morbidity statement refers to ref 262 not 263. Also noted that references 260 and 261 were the wrong way around.

28  
29  
30  
31  
32  
33  
34  
35  
36  
37  
38  
39  
40  
41  
42  
43  
44  
45  
46  
47

1  
2  
3

## W5. Extracted Key Recommendations from Clinical Practice Guidelines

4  
5  
6  
7  
8  
9  
10  
11  
12  
13  
14  
15  
16  
17  
18  
19  
20  
21  
22  
23  
24  
25  
26  
27  
28  
29  
30  
31  
32  
33  
34  
35  
36  
37  
38  
39  
40  
41  
42

| Author (year)         | Recommendations                                                                                                                                                                                                                                                                                                                                                                                                                                                                                                                                                                                                                                                                                                                                                                                                                                                                                                                                                                                                                                                                                                                                                                                                                                                                                                                                                                                                                                                                                                                                                                                                                                                                                                                                                                                                                                                                                                                                                                                                                                                                                                                                                                                                                                                                                                                                                                                                                                                                                                                                                                                                                                                                                                                                                                                                                                                                                                                                                                                                                                                                                                                                                                                                                                                                                                                                                                                                                                                                                                                                                                                                                                                                                                                                                                                                                                                                                                                                                                                                                                                                                                                                                                                                                                                                                                                                                                                                                      |
|-----------------------|--------------------------------------------------------------------------------------------------------------------------------------------------------------------------------------------------------------------------------------------------------------------------------------------------------------------------------------------------------------------------------------------------------------------------------------------------------------------------------------------------------------------------------------------------------------------------------------------------------------------------------------------------------------------------------------------------------------------------------------------------------------------------------------------------------------------------------------------------------------------------------------------------------------------------------------------------------------------------------------------------------------------------------------------------------------------------------------------------------------------------------------------------------------------------------------------------------------------------------------------------------------------------------------------------------------------------------------------------------------------------------------------------------------------------------------------------------------------------------------------------------------------------------------------------------------------------------------------------------------------------------------------------------------------------------------------------------------------------------------------------------------------------------------------------------------------------------------------------------------------------------------------------------------------------------------------------------------------------------------------------------------------------------------------------------------------------------------------------------------------------------------------------------------------------------------------------------------------------------------------------------------------------------------------------------------------------------------------------------------------------------------------------------------------------------------------------------------------------------------------------------------------------------------------------------------------------------------------------------------------------------------------------------------------------------------------------------------------------------------------------------------------------------------------------------------------------------------------------------------------------------------------------------------------------------------------------------------------------------------------------------------------------------------------------------------------------------------------------------------------------------------------------------------------------------------------------------------------------------------------------------------------------------------------------------------------------------------------------------------------------------------------------------------------------------------------------------------------------------------------------------------------------------------------------------------------------------------------------------------------------------------------------------------------------------------------------------------------------------------------------------------------------------------------------------------------------------------------------------------------------------------------------------------------------------------------------------------------------------------------------------------------------------------------------------------------------------------------------------------------------------------------------------------------------------------------------------------------------------------------------------------------------------------------------------------------------------------------------------------------------------------------------------------------------------------|
| Coleman et al. (2012) | None. Reviewer team were unable to extract key recommendations                                                                                                                                                                                                                                                                                                                                                                                                                                                                                                                                                                                                                                                                                                                                                                                                                                                                                                                                                                                                                                                                                                                                                                                                                                                                                                                                                                                                                                                                                                                                                                                                                                                                                                                                                                                                                                                                                                                                                                                                                                                                                                                                                                                                                                                                                                                                                                                                                                                                                                                                                                                                                                                                                                                                                                                                                                                                                                                                                                                                                                                                                                                                                                                                                                                                                                                                                                                                                                                                                                                                                                                                                                                                                                                                                                                                                                                                                                                                                                                                                                                                                                                                                                                                                                                                                                                                                                       |
| Davies et al. (2015)  | <p><i>Voice and Communication Intervention for Gender Nonconforming Individuals</i></p> <ol style="list-style-type: none"> <li>1. Transgender voice and communication services should be offered in the context of a complete approach to transgender health that includes comprehensive primary care and a coordinated approach to psychological and social issues.</li> <li>2. In working with gender nonconforming clients, the speech-language therapist's primary goal is to help the client develop voice and communication that more closely approximates the client's sense of self.</li> <li>3. Feminizing/masculinizing voice involves nonhabitual use of the voice-producing mechanism. To prevent the possibility of vocal damage, professional evaluation and assistance are essential.</li> <li>4. Self-guided voice and communication change without professional supervision is not recommended. Clients intending to pursue self-guided voice change should be encouraged to, at a minimum, have an initial professional assessment and then to consult with their primary care provider if they develop symptoms of vocal fatigue or negative changes to vocal quality. Self-help voice and communication groups should have appropriate clinical support.</li> </ol> <p><i>Clinical Competence</i></p> <ol style="list-style-type: none"> <li>1. Voice and communication professionals working with transgender individuals must have a basic understanding of transgender health (including hormonal and surgical feminization/masculinization) and trans-specific psychosocial issues; they must be familiar with basic sensitivity protocols such as use of preferred gender pronoun and name.</li> <li>2. Gender nonconforming individuals who are seeking voice and communication services for reasons other than speech feminization/masculinization can be treated by trans-sensitive speech-language therapists using standard voice and communication protocols. voice and communication feminization/masculinization requires additional clinical expertise and special clinical protocols.</li> </ol> <p><i>Client Inclusion and Exclusion</i></p> <ol style="list-style-type: none"> <li>1. Voice and communication services should be available to the full spectrum of the transgender community, including MtF and MtF transsexuals and others who are gender nonconforming.</li> <li>2. The need for voice and communication services should not be evaluated based on hormonal use, pursuit of sex reassignment surgery, or length or percentage of time living in the desired gender role.</li> <li>3. Services should be adapted as needed to fit a client's individual needs, including accommodation relating to speech or hearing disability, mental illness, cognitive disability, learning disability, physical disability, geographic isolation, or incarceration.</li> </ol> <p><i>Treatment Decisions</i></p> <ol style="list-style-type: none"> <li>1. The client is responsible for treatment decisions, supported by the clinician's informed professional opinion, assessment data, and any allies the client wishes to be involved. To support fully informed treatment decisions, clients should be informed of the following: <ol style="list-style-type: none"> <li>a. potential risks and benefits associated with treatment options</li> <li>b. estimated duration of treatment; factors that can influence the duration of treatment</li> </ol> </li> <li>2. Existing protocols for voice and communication feminization should be reviewed and considered when developing individualized treatment plans. As there are no established protocols for speech masculinization, FtMs seeking this service should be informed that the protocol is a trial.</li> <li>3. While modification of existing protocols is encouraged, all treatment plans (including those using new or experimental techniques) are expected to be based on a clearly articulated, logical, and valid clinical rationale. Departure from existing protocols should be explained as such to the client as part of fully informed consent and should be documented in detail to facilitate evaluation.</li> </ol> <p><i>Assessment</i></p> <ol style="list-style-type: none"> <li>1. Assessment prior to voice and communication feminization/masculinization should include the following:</li> </ol> |

1

|                                                                                                                                                                                                                     |                                                                                                                                                                                                                                                                                                                                                                                                                                                                                                                                                                                                                                                                                                                                                                                                                                                                                                                                                                                                                                                                                                                                                                                                                                                                                                                                                                                                                                                                                                                                                                                                                                                                                                                                                                                                                                                                                                                                                                                                                                                                                                                                                                                                                                                                                                                                                                                                                                                                                                                                                                                                                                                                                                                                                                                                                                                                                                                                                                                                                                                                                                                |
|---------------------------------------------------------------------------------------------------------------------------------------------------------------------------------------------------------------------|----------------------------------------------------------------------------------------------------------------------------------------------------------------------------------------------------------------------------------------------------------------------------------------------------------------------------------------------------------------------------------------------------------------------------------------------------------------------------------------------------------------------------------------------------------------------------------------------------------------------------------------------------------------------------------------------------------------------------------------------------------------------------------------------------------------------------------------------------------------------------------------------------------------------------------------------------------------------------------------------------------------------------------------------------------------------------------------------------------------------------------------------------------------------------------------------------------------------------------------------------------------------------------------------------------------------------------------------------------------------------------------------------------------------------------------------------------------------------------------------------------------------------------------------------------------------------------------------------------------------------------------------------------------------------------------------------------------------------------------------------------------------------------------------------------------------------------------------------------------------------------------------------------------------------------------------------------------------------------------------------------------------------------------------------------------------------------------------------------------------------------------------------------------------------------------------------------------------------------------------------------------------------------------------------------------------------------------------------------------------------------------------------------------------------------------------------------------------------------------------------------------------------------------------------------------------------------------------------------------------------------------------------------------------------------------------------------------------------------------------------------------------------------------------------------------------------------------------------------------------------------------------------------------------------------------------------------------------------------------------------------------------------------------------------------------------------------------------------------------|
| <p>2<br/>3<br/>4<br/>5<br/>6<br/>7<br/>8<br/>9<br/>10<br/>11<br/>12<br/>13<br/>14<br/>15<br/>16<br/>17<br/>18<br/>19<br/>20<br/>21<br/>22<br/>23<br/>24<br/>25<br/>26<br/>27<br/>28<br/>29<br/>30<br/>31<br/>32</p> | <p>a. psychosocial, voice use, voice health, and medical history<br/> b. clinical assessment of speech and voice including:<br/>     1.the client's subjective assessment<br/>     2.instrumental measurement<br/>     3.the clinician's subjective analysis<br/>     4.an assessment of potential for change<br/>     5.assistance with understanding therapeutic options<br/> 2.As there is evidence that behavioral changes (of pitch, inflection, resonance, etc.) may degrade over time, periodic re-evaluation is recommended following treatment with further clinical assistance as needed.<br/> <i>Voice and Communication Therapy</i><br/> 1.Voice and communication therapy should be individualized based on each person's goals and identity, the risks and benefits of treatment options, and consideration of social and economic issues.<br/> 2.Rather than adopting a rigid and artificial set of voice and communication norms, it is recommended that clients be assisted to develop an individualized and context-specific set of norms based on communication patterns in their own social, cultural, work, and home environments.<br/> 3.It is clinically optimal to be able to offer both individual sessions and group treatment, with the proportion of time in each format depending on the client's therapeutic needs and goals.<br/> <i>Pitch-Elevating Surgery</i><br/> 1.As there is no professional consensus regarding the effectiveness and risk-benefit ratio of pitch-elevating surgery, care should be taken to ensure that clients are fully informed of potential risks, postoperative care requirements, and possible outcomes (including decreased pitch).<br/> 2.Assessment by both a laryngologist and speech-language therapist is recommended prior to surgery.<br/> 3.Prior to surgery, the laryngologist should discuss after-care instructions with the patient and provide written after-care instructions.<br/> 4.Voice therapy should be offered following phonosurgery to help the patient adapt to and stabilize the new voice.<br/> <i>Outcome Evaluation</i><br/> 1.Outcomes should be rigorously evaluated and documented.<br/> 2.At minimum, the baseline assessment should be repeated immediately following the end of therapy. Ideally, re-evaluation would take place at 6 months, 1 year, 5 years, and 10 years after treatment.<br/> 3.Evaluation should include client satisfaction with the treatment outcome and with the quality of care provided, as well as perceptual and objective measures of voice and communication change.<br/> 4.Informal or formal sharing of outcome data (with colleagues, at conferences, in publications, etc.) must occur only if the client has provided fully informed and voluntary written consent.<br/> <i>Research</i><br/> 1.There is a paucity of data relating to speech feminization/masculinization. Further research in this area is eagerly anticipated.<br/> 2.To ensure that participation in research is voluntary, services should not be offered solely as part of a research protocol.</p> |
|---------------------------------------------------------------------------------------------------------------------------------------------------------------------------------------------------------------------|----------------------------------------------------------------------------------------------------------------------------------------------------------------------------------------------------------------------------------------------------------------------------------------------------------------------------------------------------------------------------------------------------------------------------------------------------------------------------------------------------------------------------------------------------------------------------------------------------------------------------------------------------------------------------------------------------------------------------------------------------------------------------------------------------------------------------------------------------------------------------------------------------------------------------------------------------------------------------------------------------------------------------------------------------------------------------------------------------------------------------------------------------------------------------------------------------------------------------------------------------------------------------------------------------------------------------------------------------------------------------------------------------------------------------------------------------------------------------------------------------------------------------------------------------------------------------------------------------------------------------------------------------------------------------------------------------------------------------------------------------------------------------------------------------------------------------------------------------------------------------------------------------------------------------------------------------------------------------------------------------------------------------------------------------------------------------------------------------------------------------------------------------------------------------------------------------------------------------------------------------------------------------------------------------------------------------------------------------------------------------------------------------------------------------------------------------------------------------------------------------------------------------------------------------------------------------------------------------------------------------------------------------------------------------------------------------------------------------------------------------------------------------------------------------------------------------------------------------------------------------------------------------------------------------------------------------------------------------------------------------------------------------------------------------------------------------------------------------------------|

|                                                                          |                                                                                                                                                                                                                                                                                                                                                                                                                                                                                                                                                                                                                                                                                                                                                                                                                                                                                                                                                                                                                                                                                                                                                                                                                                                                                                                                                                                                                                                                                                                                                                                                                                                                                                                                                                                                           |
|--------------------------------------------------------------------------|-----------------------------------------------------------------------------------------------------------------------------------------------------------------------------------------------------------------------------------------------------------------------------------------------------------------------------------------------------------------------------------------------------------------------------------------------------------------------------------------------------------------------------------------------------------------------------------------------------------------------------------------------------------------------------------------------------------------------------------------------------------------------------------------------------------------------------------------------------------------------------------------------------------------------------------------------------------------------------------------------------------------------------------------------------------------------------------------------------------------------------------------------------------------------------------------------------------------------------------------------------------------------------------------------------------------------------------------------------------------------------------------------------------------------------------------------------------------------------------------------------------------------------------------------------------------------------------------------------------------------------------------------------------------------------------------------------------------------------------------------------------------------------------------------------------|
| <p>33<br/>34<br/>35<br/>36<br/>37<br/>38<br/>39<br/>40<br/>41<br/>42</p> | <p>ECDC (2018)<br/> The ECDC guidance advocates for the development of an integrated national testing strategy or programme for HIV, HBV and HCV. Such integrated testing strategies or programmes should apply the six core testing principles, respect the individual needs of those tested and incorporate evidence-based interventions. Success in increasing the testing uptake should contribute considerably to the elimination of HIV and combat viral hepatitis as public health threat by 2030.<br/> <i>There are six overarching principles for HIV, HBV and HCV testing programmes in this context:</i> · An effective national testing strategy, including a monitoring and evaluation framework, is critical in responding to HIV, HBV and HCV infection. · Testing should be accessible, voluntary, confidential and contingent on informed consent. · Appropriate information should be available before and after testing. · Linkage to care is a critical part of an effective testing programme. · Normalising HIV, HBV and HCV testing in all healthcare settings; and · Those carrying out HIV, HBV and/or HCV testing should receive appropriate training and education.<br/> <i>Who to test?</i><br/> The guidance identifies the following population groups suitable for targeted HIV, HBV and HCV testing due to higher risk of infection and suggest to offer tests to: · men who have sex with men (MSM) · trans* people · people who inject drugs (PWID) · migrants<sup>2</sup> · household contacts of people diagnosed with HBV · homeless people · sex workers · people in prison · pregnant women · haemodialysis patients · people who have received blood products, organs or surgical interventions before adequate safety and quality regulations were enforced;</p> |
|--------------------------------------------------------------------------|-----------------------------------------------------------------------------------------------------------------------------------------------------------------------------------------------------------------------------------------------------------------------------------------------------------------------------------------------------------------------------------------------------------------------------------------------------------------------------------------------------------------------------------------------------------------------------------------------------------------------------------------------------------------------------------------------------------------------------------------------------------------------------------------------------------------------------------------------------------------------------------------------------------------------------------------------------------------------------------------------------------------------------------------------------------------------------------------------------------------------------------------------------------------------------------------------------------------------------------------------------------------------------------------------------------------------------------------------------------------------------------------------------------------------------------------------------------------------------------------------------------------------------------------------------------------------------------------------------------------------------------------------------------------------------------------------------------------------------------------------------------------------------------------------------------|

43  
44  
45  
46  
47



and · sexual or injecting partners of people diagnosed with HIV, HBV and HCV.

#### *Normalising testing*

Making the testing offer a routine and with that making the process similar to those for other diagnostic test, helps to reduce stigma and increases testing uptake. The implementation of indicator condition-guided HIV testing provides a useful complement to targeted HIV testing of groups at higher risk. By providing a clinical rationale for testing, this strategy can also help normalise testing and reduce barriers to it, including issues around stigma among healthcare providers and patients alike.

#### *Where to test?*

The ECDC guidance outlines where, how and when to test for viral hepatitis and HIV by providing evidence-based options of testing strategies that are applicable to all healthcare settings, as well as testing strategies specifically for: · primary healthcare settings · hospital settings · other healthcare settings (e.g. STI clinics, pharmacies, prisons and some drug and harm reduction services) · community settings (including drug and harm reduction services); and · self-sampling and self-testing.

#### *Frequency of testing*

The suggested frequency of testing is<sup>3</sup>: · For those at risk of HIV infection – at least once a year and up to every three months depending on ongoing risk, sexual behaviour, history of sexually transmitted infections, use of pre- or post-exposure prophylaxis (PrEP, PEP) and local HIV prevalence or incidence. · For those at risk of HBV infection – test those at risk who have not had a complete course of HBV vaccinations based on vaccination history. Retesting up to every 6 to 12 months is only suggested if there is an ongoing risk for either unvaccinated people or vaccine non-responders. · For those at risk of HCV infection – consider testing all sex workers, people who inject drugs, trans\* people, prisoners and migrants, and other populations at risk every 6 to 12 months depending on risk profile.

#### *Testing strategies for all settings*

##### *Focus*

In areas of intermediate (HBV/HCV) or high prevalence (HBV/HCV/HIV)<sup>4</sup>: · Consider identifying those who are unaware they are infected through geographically targeted routine testing. · Consider birth cohort or universal one-time testing as option to increase HCV testing coverage, taking into account local epidemiology, affordability and the availability of effective linkage-to-care pathways.

*In addition*: · Test all patients diagnosed with either HIV, HBV and HCV infection for the other two viruses as per guidelines from the European AIDS Clinical Society (EACS)<sup>5</sup> and European Association for the Study of the Liver (EASL)<sup>6,7</sup>. · As per the ECDC antenatal screening guidance<sup>8</sup>: offer pregnant women HBV and HIV tests during the first two trimesters of pregnancy. Offer an HCV test depending on the pregnant woman's risk profile. · Only for women at-risk: repeat HIV testing during pregnancy and HBV testing for those who decline HBV vaccination or are non-responders. · When a woman tests negative for HIV or HCV and has a partner at higher risk, facilitate testing of her partner. If the partner remains untested or risk factors are unknown, consider retesting the mother later in pregnancy. · Voluntary partner notification following a positive diagnosis helps to achieve earlier diagnosis and treatment of exposed (sexual) partners.

#### *Testing in primary healthcare settings*

Evidence shows that HIV, HBV and HCV testing in primary care (PHC) is acceptable and may effectively contribute to increase testing coverage and case detection.

##### *Focus*

Offer integrated testing to any person attending primary care if they: · identify as members of certain risk groups · present with clinical symptoms suggestive of one of three infections; or · show laboratory markers (including elevated liver enzymes) compatible with acute or chronic hepatitis or an HIV indicator condition, including a sexually transmitted infection. Rapid testing, dried blood spot testing and testing using venepuncture are all acceptable in primary care. · Consider offering all patients who were diagnosed with HBV, HCV or HIV a test for the other two viruses.

*Considerations* · Although limited, evidence on general population testing in these settings is also encouraging, at least in intermediate- and high-prevalence regions and birth cohorts. · Available evidence suggests testing coverage in primary care settings is often suboptimal and caused by factors that discourage healthcare professionals from offering tests. Consider interventions to increase test offers, including educational interventions for healthcare staff and clinical decision-making tools. · For testing in PHC settings, appropriate clinical care pathways and referral systems need to be established to ensure better linkage to care for people newly diagnosed with HBV, HCV or HIV in primary care.

#### *Testing in hospital settings*

Testing for HIV, HBV and HCV in hospital settings is generally accepted by patients and staff and can contribute to better testing coverage and case detection among risk groups or people presenting with HIV indicator conditions.

##### *Focus*

Offer integrated testing to any person attending a hospital if they: · identify as members of certain risk groups · present with clinical symptoms suggestive of one of three infections; or · show laboratory markers (including elevated liver enzymes) compatible with acute or chronic hepatitis or an HIV indicator condition, including a sexually transmitted infection. Studies

1

|                                                                                                                                                                                                                                                                                           |                                                                                                                                                                                                                                                                                                                                                                                                                                                                                                                                                                                                                                                                                                                                                                                                                                                                                                                                                                                                                                                                                                                                                                                                                                                                                                                                                                                                                                                                                                                                                                                                                                                                                                                                                                                                                                                                                                                                                                                                                                                                                                                                                                                                                                                                                                                                                                                                                                                                                                                                                                                                                                                                                                                                                                                                                                                                                                                                                                                                                                                                                                                                                                                                                                                                                                                                                                                                                                                                                                                                                                                                                                                                                                                                                                                                                                                                                                                                                                                                                                                                                                                                                                                                                                                                                                                                                                                                                                                                                                                                                                                                                                                                                                                                                                                                                                                                                                                                                                                                                                                                                                                                                                                                                                                                                                                                                                                                                                                                                                                                                                                                                                                                                                                                                                                                                                                                                                                                                                                                                                                                                                                                                                                                                                                                                                                                                                                                                                                                                   |
|-------------------------------------------------------------------------------------------------------------------------------------------------------------------------------------------------------------------------------------------------------------------------------------------|-----------------------------------------------------------------------------------------------------------------------------------------------------------------------------------------------------------------------------------------------------------------------------------------------------------------------------------------------------------------------------------------------------------------------------------------------------------------------------------------------------------------------------------------------------------------------------------------------------------------------------------------------------------------------------------------------------------------------------------------------------------------------------------------------------------------------------------------------------------------------------------------------------------------------------------------------------------------------------------------------------------------------------------------------------------------------------------------------------------------------------------------------------------------------------------------------------------------------------------------------------------------------------------------------------------------------------------------------------------------------------------------------------------------------------------------------------------------------------------------------------------------------------------------------------------------------------------------------------------------------------------------------------------------------------------------------------------------------------------------------------------------------------------------------------------------------------------------------------------------------------------------------------------------------------------------------------------------------------------------------------------------------------------------------------------------------------------------------------------------------------------------------------------------------------------------------------------------------------------------------------------------------------------------------------------------------------------------------------------------------------------------------------------------------------------------------------------------------------------------------------------------------------------------------------------------------------------------------------------------------------------------------------------------------------------------------------------------------------------------------------------------------------------------------------------------------------------------------------------------------------------------------------------------------------------------------------------------------------------------------------------------------------------------------------------------------------------------------------------------------------------------------------------------------------------------------------------------------------------------------------------------------------------------------------------------------------------------------------------------------------------------------------------------------------------------------------------------------------------------------------------------------------------------------------------------------------------------------------------------------------------------------------------------------------------------------------------------------------------------------------------------------------------------------------------------------------------------------------------------------------------------------------------------------------------------------------------------------------------------------------------------------------------------------------------------------------------------------------------------------------------------------------------------------------------------------------------------------------------------------------------------------------------------------------------------------------------------------------------------------------------------------------------------------------------------------------------------------------------------------------------------------------------------------------------------------------------------------------------------------------------------------------------------------------------------------------------------------------------------------------------------------------------------------------------------------------------------------------------------------------------------------------------------------------------------------------------------------------------------------------------------------------------------------------------------------------------------------------------------------------------------------------------------------------------------------------------------------------------------------------------------------------------------------------------------------------------------------------------------------------------------------------------------------------------------------------------------------------------------------------------------------------------------------------------------------------------------------------------------------------------------------------------------------------------------------------------------------------------------------------------------------------------------------------------------------------------------------------------------------------------------------------------------------------------------------------------------------------------------------------------------------------------------------------------------------------------------------------------------------------------------------------------------------------------------------------------------------------------------------------------------------------------------------------------------------------------------------------------------------------------------------------------------------------------------------------------------------------------|
| <p>2<br/>3<br/>4<br/>5<br/>6<br/>7<br/>8<br/>9<br/>10<br/>11<br/>12<br/>13<br/>14<br/>15<br/>16<br/>17<br/>18<br/>19<br/>20<br/>21<br/>22<br/>23<br/>24<br/>25<br/>26<br/>27<br/>28<br/>29<br/>30<br/>31<br/>32<br/>33<br/>34<br/>35<br/>36<br/>37<br/>38<br/>39<br/>40<br/>41<br/>42</p> | <p>indicate that routine testing in emergency departments, including universal testing and integrated testing, is also acceptable to patients and staff in hospitals even though it is currently supported by limited evidence on its effectiveness.</p> <p><i>Considerations</i> · Test all patients diagnosed with an HIV, HBV and HCV infection in hospital settings for the other two viruses, despite little current evidence on effectiveness. · Even though there is little evidence of the effectiveness of any specific intervention over any other, education and training programmes for healthcare staff, campaigns and clinical decision-making tools can support the offer and uptake of integrated testing strategies.</p> <p><i>Testing in other healthcare settings</i></p> <p>These settings include formal healthcare services (outside hospitals and primary care practices) such as STI, genito-urinary medicine, dermato-venereology and low-threshold clinics, pharmacies, antenatal, prison health, drug and harm reduction and tuberculosis services.</p> <p><i>Focus</i></p> <p>Based on available evidence for integrated testing in these specific settings: · Consider offering all patients diagnosed with an HBV, HCV or HIV infection a test for the other two viruses. · Ensure that people who are newly diagnosed with HBV, HCV or HIV are linked to care given that efficient testing strategies in these surroundings need appropriate pathways to care and effective referral systems.</p> <p><i>Considerations</i> · Testing for HIV, HBV and HCV, including integrated testing, in such healthcare settings results in varying degrees of effectiveness regarding the increase of testing coverage and case detection. Limited evidence suggests that rapid diagnostic tests and dried blood spot tests are acceptable and may help to increase testing coverage in such sites. · Pharmacies generally offer HIV, HBV and HCV testing under the same quality standards that apply to healthcare settings despite very limited evidence currently on the effectiveness of this activity. · Harm reduction services offer and suggest HBV and HCV testing to everyone attending drug and harm reduction services and during their initial assessments. Repeat this offer in case of indicated ongoing risk. · Sites serving migrant populations can look into offering relevant testing to people who come from countries with intermediate (HCV) or high HIV, HBV and HCV prevalence. · Prison settings can look into offering HIV, HBV and HCV testing to all people in prison as per ECDC guidance on active case finding in prison settings given the higher prevalence of blood-borne viruses in many prison settings. See also the ECDC/European Monitoring Centre for Drugs and Drug Addiction (EMCDDA) guidance on prevention and control of blood-borne viruses in prison settings<sup>9</sup>. STI/genito-urinary/dermato-venereology clinics can consider offering HIV testing to anyone seeking care regardless of symptoms or risk factors as part of the initial screening for STIs according to the International Union against Sexually Transmitted Infections' European guidelines. This includes offering HIV testing to those who: - have a high likelihood of exposure to HIV - are pregnant regardless of risk factors; or - voluntarily seek testing, especially if never tested before. Based on geographic prevalence and risk group, it may be appropriate to suggest HBV testing.</p> <p><i>Testing in community settings</i></p> <p>Community-based testing services refers to programmes and services that offer voluntary HIV and/or HBV, HCV testing outside formal healthcare facilities. They are designed to target specific population groups and clearly adapted and accessible to those communities.</p> <p><i>Focus</i></p> <p>There is a role for community-based testing to target groups at higher risk in any national testing strategy. They are acceptable and effective in increasing HIV, HBV and HCV testing coverage and case detection among these groups. Integrated testing and rapid testing may be offered for everyone accessing drug and harm reduction services in a community or outreach testing activities. Rapid testing in the community is acceptable and contributes to increased testing coverage when implemented in such settings.</p> <p>Options based on available evidence for integrated testing in these settings: · Linkage to care after HBV and HCV testing in community settings may currently be suboptimal, at least for certain risk groups. If testing in community settings is considered within a national testing scheme, clear pathways into care and other services have to be developed. This includes differentiated care pathways for the three infections and other services. · Testing services offered by lay providers help to increase testing opportunities, uptake and coverage.</p> <p><i>Self-sampling and self-testing</i></p> <p>Self-sampling and self-testing are additional options that give people the flexibility and privacy of performing an initial HIV, HBV and HCV test in their own homes or a place they consider convenient. To date, there is little scientific evidence on the effectiveness of self-sampling, especially relating to HCV and HBV, to reach any firm conclusions regarding inclusion in a national testing strategy. There is limited evidence that kits distributed to people attending an STI clinic may increase test coverage and frequency.</p> <p><i>Focus</i></p> <p>Self-sampling for HIV, HBV and HCV, including possible integrated sampling, is likely acceptable among those most at-risk and may contribute to increased testing coverage and case detection. Limited available evidence suggests that self-testing for HIV among men who have sex with men is acceptable and may increase testing coverage, frequency and case detection. Self-sampling kits can be effectively distributed through a variety of channels, such as pharmacies, healthcare settings, outreach activities and online platforms, but should be based on local circumstances and target populations</p> <p><i>Considerations</i> To ensure effective linkage to care after self-sampling and/or self-testing as part of a testing strategy, clear pathways to care and other services need to be in place or</p> |
|-------------------------------------------------------------------------------------------------------------------------------------------------------------------------------------------------------------------------------------------------------------------------------------------|-----------------------------------------------------------------------------------------------------------------------------------------------------------------------------------------------------------------------------------------------------------------------------------------------------------------------------------------------------------------------------------------------------------------------------------------------------------------------------------------------------------------------------------------------------------------------------------------------------------------------------------------------------------------------------------------------------------------------------------------------------------------------------------------------------------------------------------------------------------------------------------------------------------------------------------------------------------------------------------------------------------------------------------------------------------------------------------------------------------------------------------------------------------------------------------------------------------------------------------------------------------------------------------------------------------------------------------------------------------------------------------------------------------------------------------------------------------------------------------------------------------------------------------------------------------------------------------------------------------------------------------------------------------------------------------------------------------------------------------------------------------------------------------------------------------------------------------------------------------------------------------------------------------------------------------------------------------------------------------------------------------------------------------------------------------------------------------------------------------------------------------------------------------------------------------------------------------------------------------------------------------------------------------------------------------------------------------------------------------------------------------------------------------------------------------------------------------------------------------------------------------------------------------------------------------------------------------------------------------------------------------------------------------------------------------------------------------------------------------------------------------------------------------------------------------------------------------------------------------------------------------------------------------------------------------------------------------------------------------------------------------------------------------------------------------------------------------------------------------------------------------------------------------------------------------------------------------------------------------------------------------------------------------------------------------------------------------------------------------------------------------------------------------------------------------------------------------------------------------------------------------------------------------------------------------------------------------------------------------------------------------------------------------------------------------------------------------------------------------------------------------------------------------------------------------------------------------------------------------------------------------------------------------------------------------------------------------------------------------------------------------------------------------------------------------------------------------------------------------------------------------------------------------------------------------------------------------------------------------------------------------------------------------------------------------------------------------------------------------------------------------------------------------------------------------------------------------------------------------------------------------------------------------------------------------------------------------------------------------------------------------------------------------------------------------------------------------------------------------------------------------------------------------------------------------------------------------------------------------------------------------------------------------------------------------------------------------------------------------------------------------------------------------------------------------------------------------------------------------------------------------------------------------------------------------------------------------------------------------------------------------------------------------------------------------------------------------------------------------------------------------------------------------------------------------------------------------------------------------------------------------------------------------------------------------------------------------------------------------------------------------------------------------------------------------------------------------------------------------------------------------------------------------------------------------------------------------------------------------------------------------------------------------------------------------------------------------------------------------------------------------------------------------------------------------------------------------------------------------------------------------------------------------------------------------------------------------------------------------------------------------------------------------------------------------------------------------------------------------------------------------------------------------------------------------------------------------------------------------|

43

44

45

46

47

developed, including differentiated care pathways for the three infections.

*Contact tracing (includes voluntary partner notification)*

Contact tracing, including partner notification, implies that people who may potentially have been exposed to an infection are informed of this possibility and are offered a test. This can also include other interventions depending on the specific infection. Partner notification is a voluntary process in which a trained provider asks a person diagnosed with HIV, HBV and HCV about details of their sexual partners, at-risk drug injecting partners and household contacts as indicated by the diagnosis and then offers to invite them for a test. The identity of the diagnosed person remains anonymous to the contact unless consent is given.

*Focus*

Even though there is currently limited evidence on the effectiveness of partner notification in increasing testing coverage and case detection, mainly related to HIV, it follows public health logic in response to other communicable diseases to offer voluntary anonymous partner notification to every patient with a newly confirmed diagnosis. There are various strategies to implement partner notification, including passive notification, assisted anonymous notification using a web-based platform and assisted notification with the direct involvement of the service provider.

*Considerations* Current implementation of partner notification processes appears to be suboptimal across Europe. While the success of interventions to increase the coverage of partner notification may depend on local factors, including organisational and legal circumstances, educational interventions targeting healthcare workers may prove to be beneficial.

*Monitoring integrated national testing strategies or programmes for HBV, HCV and HIV*

Monitoring and evaluation is an essential component of any effective testing programme. While strategic information should guide the design of testing initiatives, monitoring and evaluation data permit continuous reevaluation of targets as well as assessment of programme effectiveness, efficiency and impact. Such data can prove invaluable in planning improvements

|                               |                                                                                                                                                                                                                                                                                                                                                                                                                                                                                                                                                                                                                                                                                                                                                                                                                                                                                                                                                                                                                                                                                                                                                                                                                                                                                                                                                                                                                                                                                                                                                                                                                                                                                                                                                                                                                                                                                                                                                                                                                                                                                                                                                                                                                                                                                                                                                                                                                                                                                                                                                                                                                                                                                                                                                                                                                                                                                                                                                                                                                                                                                                                                                                                                                                                                                                                                                                                                                                                                                                                                                                                                                                                                                                                                             |
|-------------------------------|---------------------------------------------------------------------------------------------------------------------------------------------------------------------------------------------------------------------------------------------------------------------------------------------------------------------------------------------------------------------------------------------------------------------------------------------------------------------------------------------------------------------------------------------------------------------------------------------------------------------------------------------------------------------------------------------------------------------------------------------------------------------------------------------------------------------------------------------------------------------------------------------------------------------------------------------------------------------------------------------------------------------------------------------------------------------------------------------------------------------------------------------------------------------------------------------------------------------------------------------------------------------------------------------------------------------------------------------------------------------------------------------------------------------------------------------------------------------------------------------------------------------------------------------------------------------------------------------------------------------------------------------------------------------------------------------------------------------------------------------------------------------------------------------------------------------------------------------------------------------------------------------------------------------------------------------------------------------------------------------------------------------------------------------------------------------------------------------------------------------------------------------------------------------------------------------------------------------------------------------------------------------------------------------------------------------------------------------------------------------------------------------------------------------------------------------------------------------------------------------------------------------------------------------------------------------------------------------------------------------------------------------------------------------------------------------------------------------------------------------------------------------------------------------------------------------------------------------------------------------------------------------------------------------------------------------------------------------------------------------------------------------------------------------------------------------------------------------------------------------------------------------------------------------------------------------------------------------------------------------------------------------------------------------------------------------------------------------------------------------------------------------------------------------------------------------------------------------------------------------------------------------------------------------------------------------------------------------------------------------------------------------------------------------------------------------------------------------------------------------|
| <p>Gilligan et al. (2017)</p> | <ol style="list-style-type: none"> <li>1. Core communication skills             <ol style="list-style-type: none"> <li>1.1. Before each conversation, clinicians should review the patient's medical information, establish goals for the conversation, and anticipate the needs and responses of the patient and family.</li> <li>1.2. At the beginning of conversations with patients, clinicians should explore the patient's understanding of their disease and collaboratively set an agenda with the patient after inquiring what the patient and family wish to address and explaining what the clinician wishes to address.</li> <li>1.3. During patient visits, clinicians should engage in behaviors that actively foster trust, confidence in the clinician, and collaboration.</li> <li>1.4. Clinicians should provide information that is timely and oriented to the patient's concerns and preferences for information. After providing information, clinicians should check for patient understanding and document important discussions in the medical record.</li> <li>1.5. When patients display emotion through verbal or nonverbal behavior, clinicians should respond empathically.</li> </ol> </li> <li>2. Discussing goals of care and prognosis             <ol style="list-style-type: none"> <li>2.1. Clinicians should provide diagnostic and prognostic information that is tailored to the patient's needs and that provides hope and reassurance without misleading the patient.</li> <li>2.2. Clinicians should reassess a patient's goals, priorities, and desire for information whenever a significant change in the patient's care is being considered.</li> <li>2.3. Clinicians should provide information in simple and direct terms.</li> <li>2.4. When providing bad news, clinicians should take additional steps to address the needs and responses of patients.</li> </ol> </li> <li>3. Discussing treatment options and clinical trials             <ol style="list-style-type: none"> <li>3.1. Before discussing specific treatment options with the patient, clinicians should clarify the goals of treatment (cure v prolongation of survival v improved quality of life) so that the patient understands likely outcomes and can relate the goals of treatment to their goals of care.</li> <li>3.2. When reviewing treatment options with patients, clinicians should provide information about the potential benefits and burdens of any treatment (proportionality) and check the patient's understanding of these benefits and burdens.</li> <li>3.3. Clinicians should discuss treatment options in a way that preserves patient hope, promotes autonomy, and facilitates understanding.</li> <li>3.4. Clinicians should make patients aware of all treatment options, including clinical trials and a sole focus on palliative care. When appropriate, clinicians should discuss the option of initiating palliative care simultaneously with other treatment modalities. If clinical trials are available, clinicians should start treatment discussions with standard treatments available off trial and then move to a discussion of applicable clinical trials if the patient is interested.</li> </ol> </li> <li>4. Discussing end-of-life care             <ol style="list-style-type: none"> <li>4.1. Clinicians should use an organized framework to guide the bidirectional communication about end-of-life care with patients and families.</li> <li>4.2. Clinicians should initiate conversations about patients' end-of-life preferences early in the course of incurable illness and readdress this topic periodically based on clinical events or</li> </ol> </li> </ol> |
|-------------------------------|---------------------------------------------------------------------------------------------------------------------------------------------------------------------------------------------------------------------------------------------------------------------------------------------------------------------------------------------------------------------------------------------------------------------------------------------------------------------------------------------------------------------------------------------------------------------------------------------------------------------------------------------------------------------------------------------------------------------------------------------------------------------------------------------------------------------------------------------------------------------------------------------------------------------------------------------------------------------------------------------------------------------------------------------------------------------------------------------------------------------------------------------------------------------------------------------------------------------------------------------------------------------------------------------------------------------------------------------------------------------------------------------------------------------------------------------------------------------------------------------------------------------------------------------------------------------------------------------------------------------------------------------------------------------------------------------------------------------------------------------------------------------------------------------------------------------------------------------------------------------------------------------------------------------------------------------------------------------------------------------------------------------------------------------------------------------------------------------------------------------------------------------------------------------------------------------------------------------------------------------------------------------------------------------------------------------------------------------------------------------------------------------------------------------------------------------------------------------------------------------------------------------------------------------------------------------------------------------------------------------------------------------------------------------------------------------------------------------------------------------------------------------------------------------------------------------------------------------------------------------------------------------------------------------------------------------------------------------------------------------------------------------------------------------------------------------------------------------------------------------------------------------------------------------------------------------------------------------------------------------------------------------------------------------------------------------------------------------------------------------------------------------------------------------------------------------------------------------------------------------------------------------------------------------------------------------------------------------------------------------------------------------------------------------------------------------------------------------------------------------|

1

|                                                                                                                                                                                         |                                                                                                                                                                                                                                                                                                                                                                                                                                                                                                                                                                                                                                                                                                                                                                                                                                                                                                                                                                                                                                                                                                                                                                                                                                                                                                                                                                                                                                                                                                                                                                                                                                                                                                                                                                                                                                                                                                                                                                                                                                                                                                                                                                                                                                                                                                                                                                                                                                                                                                                                                                                                                                                                                                                                                                                                                                                                                                                                                                                                                                                                                                                                                                                                                                                                                                                                                                                                                                    |
|-----------------------------------------------------------------------------------------------------------------------------------------------------------------------------------------|------------------------------------------------------------------------------------------------------------------------------------------------------------------------------------------------------------------------------------------------------------------------------------------------------------------------------------------------------------------------------------------------------------------------------------------------------------------------------------------------------------------------------------------------------------------------------------------------------------------------------------------------------------------------------------------------------------------------------------------------------------------------------------------------------------------------------------------------------------------------------------------------------------------------------------------------------------------------------------------------------------------------------------------------------------------------------------------------------------------------------------------------------------------------------------------------------------------------------------------------------------------------------------------------------------------------------------------------------------------------------------------------------------------------------------------------------------------------------------------------------------------------------------------------------------------------------------------------------------------------------------------------------------------------------------------------------------------------------------------------------------------------------------------------------------------------------------------------------------------------------------------------------------------------------------------------------------------------------------------------------------------------------------------------------------------------------------------------------------------------------------------------------------------------------------------------------------------------------------------------------------------------------------------------------------------------------------------------------------------------------------------------------------------------------------------------------------------------------------------------------------------------------------------------------------------------------------------------------------------------------------------------------------------------------------------------------------------------------------------------------------------------------------------------------------------------------------------------------------------------------------------------------------------------------------------------------------------------------------------------------------------------------------------------------------------------------------------------------------------------------------------------------------------------------------------------------------------------------------------------------------------------------------------------------------------------------------------------------------------------------------------------------------------------------------|
| <p>2<br/>3<br/>4<br/>5<br/>6<br/>7<br/>8<br/>9<br/>10<br/>11<br/>12<br/>13<br/>14<br/>15<br/>16<br/>17<br/>18<br/>19<br/>20<br/>21<br/>22<br/>23<br/>24<br/>25<br/>26<br/>27<br/>28</p> | <p>patient preferences.</p> <p>4.3. Clinicians should explore how a patient's culture, religion, or spiritual belief system affects their end-of-life decision making or care preferences.</p> <p>4.4. Clinicians should recognize and respond empathically to grief and loss among patients, families, and themselves. Clinicians should refer patients and families to psychosocial team members (eg, social workers, counselors, psychologists, psychiatrists, and clergy) when appropriate.</p> <p>4.5. Clinicians should identify and suggest local resources to provide robust support to patients, families, and loved ones transitioning to end-of-life care.</p> <p>5. Using communication to facilitate family involvement in care</p> <p>5.1. Clinicians should suggest family and/or caregiver involvement in discussions (with patient consent) early in the course of the illness for support and discussion about goals of care.</p> <p>5.2. Determine if a formal family meeting in a hospital or outpatient setting is indicated at important junctures in care. When possible, ensure that patients, their designated surrogates, and desired medical professionals are present.</p> <p>6. Communicating effectively when there are barriers to communication</p> <p>6.1. For families who do not share a common language with the clinician, use a medical interpreter rather than a family interpreter.</p> <p>6.2. For patients with low health literacy, focus on the most important points, use plain language, and check frequently for understanding.</p> <p>6.3. For patients with low health numeracy, use pictographs or other visual aids when available, and describe absolute risk rather than relative risk.</p> <p>7. Discussing cost of care</p> <p>7. Clinicians should explore whether cost of care is a concern for patients with cancer.</p> <p>8. Meeting the needs of underserved populations</p> <p>8.1. Enter clinical encounters with a sense of curiosity, aware that any patient and family, regardless of their background, may have beliefs, experiences, understandings, and expectations that are different from the clinician's.</p> <p>8.2. Avoid assumptions about sexual orientation and gender identity and use nonjudgmental language when discussing sexuality and sexual behavior.</p> <p>8.3. Remain aware that members of underserved or marginalized populations have an increased likelihood of having had negative past health care experiences, including feeling disrespected, alienated, or unsafe.</p> <p>9. Clinician training in communication skills</p> <p>9.1. Communication skills training should be based on sound educational principles and include and emphasize skills practice and experiential learning using role-play scenarios, direct observation of patient encounters, and other validated techniques.</p> <p>9.2. For communication skills training to be most effective, it should foster practitioner self-awareness and situational awareness related to emotions, attitudes, and underlying beliefs that may affect communication as well as awareness of implicit biases that may affect decision making.</p> <p>9.3. Facilitators of communication skills training should have sufficient training and experience to effectively model and teach the desired communication skills and facilitate experiential learning exercises.</p> |
|-----------------------------------------------------------------------------------------------------------------------------------------------------------------------------------------|------------------------------------------------------------------------------------------------------------------------------------------------------------------------------------------------------------------------------------------------------------------------------------------------------------------------------------------------------------------------------------------------------------------------------------------------------------------------------------------------------------------------------------------------------------------------------------------------------------------------------------------------------------------------------------------------------------------------------------------------------------------------------------------------------------------------------------------------------------------------------------------------------------------------------------------------------------------------------------------------------------------------------------------------------------------------------------------------------------------------------------------------------------------------------------------------------------------------------------------------------------------------------------------------------------------------------------------------------------------------------------------------------------------------------------------------------------------------------------------------------------------------------------------------------------------------------------------------------------------------------------------------------------------------------------------------------------------------------------------------------------------------------------------------------------------------------------------------------------------------------------------------------------------------------------------------------------------------------------------------------------------------------------------------------------------------------------------------------------------------------------------------------------------------------------------------------------------------------------------------------------------------------------------------------------------------------------------------------------------------------------------------------------------------------------------------------------------------------------------------------------------------------------------------------------------------------------------------------------------------------------------------------------------------------------------------------------------------------------------------------------------------------------------------------------------------------------------------------------------------------------------------------------------------------------------------------------------------------------------------------------------------------------------------------------------------------------------------------------------------------------------------------------------------------------------------------------------------------------------------------------------------------------------------------------------------------------------------------------------------------------------------------------------------------------|

|                                                                                                      |                                                                                                                                                                                                                                                                                                                                                                                                                                                                                                                                                                                                                                                                                                                                                                                                                                                                                                                                                                                                                                                                                                                                                                                                                                                                                                                                                                                                                                                                                                                                                                                                                                                                                                                                                                                                                                                                                                                                                                                                                                                                                                                                                                                                                                                                                                                       |
|------------------------------------------------------------------------------------------------------|-----------------------------------------------------------------------------------------------------------------------------------------------------------------------------------------------------------------------------------------------------------------------------------------------------------------------------------------------------------------------------------------------------------------------------------------------------------------------------------------------------------------------------------------------------------------------------------------------------------------------------------------------------------------------------------------------------------------------------------------------------------------------------------------------------------------------------------------------------------------------------------------------------------------------------------------------------------------------------------------------------------------------------------------------------------------------------------------------------------------------------------------------------------------------------------------------------------------------------------------------------------------------------------------------------------------------------------------------------------------------------------------------------------------------------------------------------------------------------------------------------------------------------------------------------------------------------------------------------------------------------------------------------------------------------------------------------------------------------------------------------------------------------------------------------------------------------------------------------------------------------------------------------------------------------------------------------------------------------------------------------------------------------------------------------------------------------------------------------------------------------------------------------------------------------------------------------------------------------------------------------------------------------------------------------------------------|
| <p>29<br/>30<br/>31<br/>32<br/>33<br/>34<br/>35<br/>36<br/>37<br/>38<br/>39<br/>40<br/>41<br/>42</p> | <p>Hembree et al. (2017)</p> <p><i>1.0 Evaluation of youth and adults</i></p> <p>1.1. We advise that only trained mental health professionals (MHPs) {and/or trained physicians} who meet the following criteria should diagnose gender dysphoria (GD)/gender incongruence in adults: (1) competence in using the Diagnostic and Statistical Manual of Mental Disorders (DSM) and/or the International Statistical Classification of Diseases and Related Health Problems (ICD) for diagnostic purposes, (2) the ability to diagnose GD/gender incongruence and make a distinction between GD/gender incongruence and conditions that have similar features (e.g., body dysmorphic disorder), (3) training in diagnosing psychiatric conditions, (4) the ability to undertake or refer for appropriate treatment, (5) the ability to psychosocially assess the person's understanding, mental health, and social conditions that can impact gender-affirming hormone therapy, and (6) a practice of regularly attending relevant professional meetings.</p> <p>1.2. We advise that only MHPs who meet the following criteria should diagnose GD/gender incongruence in children and adolescents: (1) training in child and adolescent developmental psychology and psychopathology, (2) competence in using the DSM and/or the ICD for diagnostic purposes, (3) the ability to make a distinction between GD/gender incongruence and conditions that have similar features (e.g., body dysmorphic disorder), (4) training in diagnosing psychiatric conditions, (5) the ability to undertake or refer for appropriate treatment, (6) the ability to psychosocially assess the person's understanding and social conditions that can impact gender-affirming hormone therapy, (7) a practice of regularly attending relevant professional meetings, and (8) knowledge of the criteria for puberty blocking and gender-affirming hormone treatment in adolescents.</p> <p>1.3. We advise that decisions regarding the social transition of prepubertal youths with GD/gender incongruence are made with the assistance of an MHP or another experienced professional.</p> <p>1.4. We recommend against puberty blocking and gender-affirming hormone treatment in prepubertal children with GD/gender incongruence.</p> |
|------------------------------------------------------------------------------------------------------|-----------------------------------------------------------------------------------------------------------------------------------------------------------------------------------------------------------------------------------------------------------------------------------------------------------------------------------------------------------------------------------------------------------------------------------------------------------------------------------------------------------------------------------------------------------------------------------------------------------------------------------------------------------------------------------------------------------------------------------------------------------------------------------------------------------------------------------------------------------------------------------------------------------------------------------------------------------------------------------------------------------------------------------------------------------------------------------------------------------------------------------------------------------------------------------------------------------------------------------------------------------------------------------------------------------------------------------------------------------------------------------------------------------------------------------------------------------------------------------------------------------------------------------------------------------------------------------------------------------------------------------------------------------------------------------------------------------------------------------------------------------------------------------------------------------------------------------------------------------------------------------------------------------------------------------------------------------------------------------------------------------------------------------------------------------------------------------------------------------------------------------------------------------------------------------------------------------------------------------------------------------------------------------------------------------------------|

43  
44  
45  
46  
47

1.5. We recommend that clinicians inform and counsel all individuals seeking gender-affirming medical treatment regarding options for fertility preservation prior to initiating puberty suppression in adolescents and prior to treating with hormonal therapy of the affirmed gender in both adolescents and adults.

*2.0 Treatment of adolescents*

2.1. We suggest that adolescents who meet diagnostic criteria for GD/gender incongruence, fulfill criteria for treatment, and are requesting treatment should initially undergo treatment to suppress pubertal development.

2.2. We suggest that clinicians begin pubertal hormone suppression after girls and boys first exhibit physical changes of puberty.

2.3. We recommend that, where indicated, GnRH analogues are used to suppress pubertal hormones.

2.4. In adolescents who request sex hormone treatment (given this is a partly irreversible treatment), we recommend initiating treatment using a gradually increasing dose schedule after a multidisciplinary team of medical and MHPs has confirmed the persistence of GD/gender incongruence and sufficient mental capacity to give informed consent, which most adolescents have by age 16 years.

2.5. We recognize that there may be compelling reasons to initiate sex hormone treatment prior to the age of 16 years in some adolescents with GD/gender incongruence, even though there are minimal published studies of gender-affirming hormone treatments administered before age 13.5 to 14 years. As with the care of adolescents  $\geq 16$  years of age, we recommend that an expert multidisciplinary team of medical and MHPs manage this treatment.

2.6. We suggest monitoring clinical pubertal development every 3 to 6 months and laboratory parameters every 6 to 12 months during sex hormone treatment.

*3.0 Hormonal therapy for transgender adults*

3.1. We recommend that clinicians confirm the diagnostic criteria of GD/gender incongruence and the criteria for the endocrine phase of gender transition before beginning treatment.

3.2. We recommend that clinicians evaluate and address medical conditions that can be exacerbated by hormone depletion and treatment with sex hormones of the affirmed gender before beginning treatment.

3.3. We suggest that clinicians measure hormone levels during treatment to ensure that endogenous sex steroids are suppressed and administered sex steroids are maintained in the normal physiologic range for the affirmed gender.

3.4. We suggest that endocrinologists provide education to transgender individuals undergoing treatment about the onset and time course of physical changes induced by sex hormone treatment.

*4.0 Adverse outcome prevention and long-term care*

4.1. We suggest regular clinical evaluation for physical changes and potential adverse changes in response to sex steroid hormones and laboratory monitoring of sex steroid hormone levels every 3 months during the first year of hormone therapy for transgender males and females and then once or twice yearly.

4.2. We suggest periodically monitoring prolactin levels in transgender females treated with estrogens.

4.3. We suggest that clinicians evaluate transgender persons treated with hormones for cardiovascular risk factors using fasting lipid profiles, diabetes screening, and/or other diagnostic tools.

4.4. We recommend that clinicians obtain bone mineral density (BMD) measurements when risk factors for osteoporosis exist, specifically in those who stop sex hormone therapy after gonadectomy.

4.5. We suggest that transgender females with no known increased risk of breast cancer follow breast-screening guidelines recommended for non-transgender females.

4.6. We suggest that transgender females treated with estrogens follow individualized screening according to personal risk for prostatic disease and prostate cancer.

4.7. We advise that clinicians determine the medical necessity of including a total hysterectomy and oophorectomy as part of gender-affirming surgery.

*5.0 Surgery for sex reassignment and gender confirmation*

5.1. We recommend that a patient pursue genital gender-affirming surgery only after the MHP and the clinician responsible for endocrine transition therapy both agree that surgery is medically necessary and would benefit the patient's overall health and/or well-being.

5.2. We advise that clinicians approve genital gender-affirming surgery only after completion of at least 1 year of consistent and compliant hormone treatment, unless hormone therapy is not desired or medically contraindicated.

5.3. We advise that the clinician responsible for endocrine treatment and the primary care provider ensure appropriate medical clearance of transgender individuals for genital gender-affirming surgery and collaborate with the surgeon regarding hormone use during and after surgery.

5.4. We recommend that clinicians refer hormone-treated transgender individuals for genital surgery when: (1) the individual has had a satisfactory social role change, (2) the individual is satisfied about the hormonal effects, and (3) the individual desires definitive surgical changes.

1  
2  
3  
4  
5  
6  
7  
8  
9  
10  
11  
12  
13  
14  
15  
16  
17  
18  
19  
20  
21  
22  
23  
24  
25  
26  
27  
28  
29  
30  
31  
32  
33  
34  
35  
36  
37  
38  
39  
40  
41  
42  
43  
44  
45  
46  
47

5.5. We suggest that clinicians delay gender-affirming genital surgery involving gonadectomy and/or hysterectomy until the patient is at least 18 years old or legal age of majority in his or her country.

5.6. We suggest that clinicians determine the timing of breast surgery for transgender males based upon the physical and mental health status of the individual. There is insufficient evidence to recommend a specific age requirement.

IAPHCCO (2015)

*Optimizing the HIV care environment*

1. Laws that criminalize the conduct of or exert punitive legal measures against MSM, transgender individuals, substance users, and sex workers are not recommended and should be repealed where they have been enacted.
2. Laws that criminalize the conduct of PLHIV based on perceived exposure to HIV, and without any evidence of intent to do harm, are not recommended and should be repealed where they have been enacted.
3. HIV-related restrictions on entry, stay, and residence in any country for PLHIV are not recommended and should be repealed where they have been enacted.
4. Strategies to monitor for and eliminate stigma and discrimination based on race, ethnicity, gender, age, sexual orientation, and/or behavior in all settings, but particularly in health care settings, using standardized measures and evidence-based approaches, are recommended.
5. Proactive steps are recommended to identify and manage clinical mental health disorders (eg, anxiety, depression, and traumatic stress) and/or mental health issues related to HIV diagnosis, disclosure of HIV status, and/or HIV treatment.
6. Enabling PLHIV to take responsibility for their care (eg, self-management, user-driven care) is recommended.
7. Shifting and sharing HIV testing, dispensing of ART, and other appropriate tasks among professional and paraprofessional health worker cadres is recommended.
- 7a. Use of lay health workers to provide pretest education and testing and to enhance PLHIV engagement in HIV care is recommended.
- 7b. Task shifting/sharing from physicians to appropriately trained health care providers, including nurses and associate clinicians, is recommended for ART initiation and maintenance.
8. Community engagement in every step across the HIV care continuum is recommended.

*Increasing HIV testing coverage and linkage to care*

9. Routinely offering opt-out HIV testing to all individuals who present at health facilities is recommended.
10. Community-based HIV testing is recommended to reach those who are less likely to attend facility-based HIV testing.
11. Confidential, voluntary HIV testing in large workplace and institutional settings (military, police, mining/trucking companies, and educational venues) should be considered. (B III) 12.
- HIV self-testing is recommended with the provision of guidance about the proper method for administering the test and direction on what to do once the results have been obtained.
13. Use of epidemiological data and network analyses to identify individuals at risk of HIV infection for HIV testing is recommended.
14. The offer of HIV testing to partners of newly diagnosed individuals is recommended.
15. Immediate referral to HIV care is recommended following an HIV-positive diagnosis to improve linkage to ART.
16. For high-risk individuals who test HIV negative, offering PrEP is recommended in addition to the provision of free condoms, education about risk reduction strategies, PEP, and voluntary medical male circumcision.
17. Use of case managers and patient navigators to increase linkage to care is recommended.

*Increasing HIV treatment coverage*

18. The immediate offer of ART after HIV diagnosis, irrespective of CD4 count or clinical stage, is recommended.
19. First-line ARV regimens with the highest levels of efficacy, lowest adverse event profiles, and delivered in QD fixed-dose combinations are recommended.
20. Viral load testing at least every 6 months is recommended as the preferred tool for monitoring ART response.
21. HIV drug resistance testing is recommended at entry into care or prior to ART initiation and when virologic failure is confirmed.
- 21a. Where routine access to HIV drug resistance testing is restricted, population-based surveillance is recommended.
22. Community-located ART distribution is recommended.
- 22a. The use of community-based pharmacies should be considered.

*Increasing retention in care, ART adherence, and viral suppression*

23. Systematic monitoring of retention in HIV care is recommended for all patients.
- 23a. Retention in HIV care should be considered as a quality indicator.
- 23b. Measuring retention in HIV care using electronic health record and other health system data is recommended.
- 23c. Use of clinic databases/surveillance systems for HIV clinical monitoring and population-level tracking is recommended.

1

2

3

4

5

6

7

8

9

10

11

12

13

14

15

16

17

18

19

20

21

22

23

24

25

26

27

28

29

30

31

32

33

34

35

36

37

38

39

40

41

42

43

44

45

46

47

|                                                                                                                                                                                                                                                                                                                                                                                  |                     |                                                                                                                                                                                                                                                                                                                                                                                                                                                                                                                                                                                                                                                                                                                                                                                                                                                                                                                                                                                                                                                                                                                                                                                                                                                                                                                                                                                                                                                                                                                                                                                                                                                                                                                                                  |      |     |      |      |     |      |     |      |     |      |                    |     |     |                                                             |     |     |     |     |  |
|----------------------------------------------------------------------------------------------------------------------------------------------------------------------------------------------------------------------------------------------------------------------------------------------------------------------------------------------------------------------------------|---------------------|--------------------------------------------------------------------------------------------------------------------------------------------------------------------------------------------------------------------------------------------------------------------------------------------------------------------------------------------------------------------------------------------------------------------------------------------------------------------------------------------------------------------------------------------------------------------------------------------------------------------------------------------------------------------------------------------------------------------------------------------------------------------------------------------------------------------------------------------------------------------------------------------------------------------------------------------------------------------------------------------------------------------------------------------------------------------------------------------------------------------------------------------------------------------------------------------------------------------------------------------------------------------------------------------------------------------------------------------------------------------------------------------------------------------------------------------------------------------------------------------------------------------------------------------------------------------------------------------------------------------------------------------------------------------------------------------------------------------------------------------------|------|-----|------|------|-----|------|-----|------|-----|------|--------------------|-----|-----|-------------------------------------------------------------|-----|-----|-----|-----|--|
| 24.                                                                                                                                                                                                                                                                                                                                                                              | 24a.                | 24b.                                                                                                                                                                                                                                                                                                                                                                                                                                                                                                                                                                                                                                                                                                                                                                                                                                                                                                                                                                                                                                                                                                                                                                                                                                                                                                                                                                                                                                                                                                                                                                                                                                                                                                                                             | 24c. | 25. | 25a. | 25b. | 26. | 26a. | 27. | 27a. | 28. | 28a. | <i>Adolescents</i> | 29. | 31. | <i>Metrics for and monitoring of the HIV care continuum</i> | 33. | 34. | 35. | 36. |  |
| Routinely recommended in all patients.                                                                                                                                                                                                                                                                                                                                           |                     |                                                                                                                                                                                                                                                                                                                                                                                                                                                                                                                                                                                                                                                                                                                                                                                                                                                                                                                                                                                                                                                                                                                                                                                                                                                                                                                                                                                                                                                                                                                                                                                                                                                                                                                                                  |      |     |      |      |     |      |     |      |     |      |                    |     |     |                                                             |     |     |     |     |  |
| Viral suppression is recommended as the primary adherence monitoring metric.                                                                                                                                                                                                                                                                                                     |                     |                                                                                                                                                                                                                                                                                                                                                                                                                                                                                                                                                                                                                                                                                                                                                                                                                                                                                                                                                                                                                                                                                                                                                                                                                                                                                                                                                                                                                                                                                                                                                                                                                                                                                                                                                  |      |     |      |      |     |      |     |      |     |      |                    |     |     |                                                             |     |     |     |     |  |
| Routine collection of self-reported adherence data from patients is recommended.                                                                                                                                                                                                                                                                                                 |                     |                                                                                                                                                                                                                                                                                                                                                                                                                                                                                                                                                                                                                                                                                                                                                                                                                                                                                                                                                                                                                                                                                                                                                                                                                                                                                                                                                                                                                                                                                                                                                                                                                                                                                                                                                  |      |     |      |      |     |      |     |      |     |      |                    |     |     |                                                             |     |     |     |     |  |
| Pharmacy refill data are recommended for adherence monitoring.                                                                                                                                                                                                                                                                                                                   |                     |                                                                                                                                                                                                                                                                                                                                                                                                                                                                                                                                                                                                                                                                                                                                                                                                                                                                                                                                                                                                                                                                                                                                                                                                                                                                                                                                                                                                                                                                                                                                                                                                                                                                                                                                                  |      |     |      |      |     |      |     |      |     |      |                    |     |     |                                                             |     |     |     |     |  |
| Information and communication technologies aimed at supporting patient self-care are recommended.                                                                                                                                                                                                                                                                                |                     |                                                                                                                                                                                                                                                                                                                                                                                                                                                                                                                                                                                                                                                                                                                                                                                                                                                                                                                                                                                                                                                                                                                                                                                                                                                                                                                                                                                                                                                                                                                                                                                                                                                                                                                                                  |      |     |      |      |     |      |     |      |     |      |                    |     |     |                                                             |     |     |     |     |  |
| Mobile health technology using weekly interactive components (eg, 2-way SMS) is recommended.                                                                                                                                                                                                                                                                                     |                     |                                                                                                                                                                                                                                                                                                                                                                                                                                                                                                                                                                                                                                                                                                                                                                                                                                                                                                                                                                                                                                                                                                                                                                                                                                                                                                                                                                                                                                                                                                                                                                                                                                                                                                                                                  |      |     |      |      |     |      |     |      |     |      |                    |     |     |                                                             |     |     |     |     |  |
| Alarm devices are recommended as reminders for PLHIV with memory impairment.                                                                                                                                                                                                                                                                                                     |                     |                                                                                                                                                                                                                                                                                                                                                                                                                                                                                                                                                                                                                                                                                                                                                                                                                                                                                                                                                                                                                                                                                                                                                                                                                                                                                                                                                                                                                                                                                                                                                                                                                                                                                                                                                  |      |     |      |      |     |      |     |      |     |      |                    |     |     |                                                             |     |     |     |     |  |
| Patient education about and offering support for medication adherence and keeping clinic appointments are recommended.                                                                                                                                                                                                                                                           |                     |                                                                                                                                                                                                                                                                                                                                                                                                                                                                                                                                                                                                                                                                                                                                                                                                                                                                                                                                                                                                                                                                                                                                                                                                                                                                                                                                                                                                                                                                                                                                                                                                                                                                                                                                                  |      |     |      |      |     |      |     |      |     |      |                    |     |     |                                                             |     |     |     |     |  |
| Pillbox organizers are recommended, particularly for HIV-infected adults with lifestyle-related barriers to adherence.                                                                                                                                                                                                                                                           |                     |                                                                                                                                                                                                                                                                                                                                                                                                                                                                                                                                                                                                                                                                                                                                                                                                                                                                                                                                                                                                                                                                                                                                                                                                                                                                                                                                                                                                                                                                                                                                                                                                                                                                                                                                                  |      |     |      |      |     |      |     |      |     |      |                    |     |     |                                                             |     |     |     |     |  |
| Neither directly administered nor directly observed ART is recommended for routine clinical care settings.                                                                                                                                                                                                                                                                       |                     |                                                                                                                                                                                                                                                                                                                                                                                                                                                                                                                                                                                                                                                                                                                                                                                                                                                                                                                                                                                                                                                                                                                                                                                                                                                                                                                                                                                                                                                                                                                                                                                                                                                                                                                                                  |      |     |      |      |     |      |     |      |     |      |                    |     |     |                                                             |     |     |     |     |  |
| Directly administered ART is recommended for people who inject drugs and released prisoners at high risk of ART non-adherence.                                                                                                                                                                                                                                                   |                     |                                                                                                                                                                                                                                                                                                                                                                                                                                                                                                                                                                                                                                                                                                                                                                                                                                                                                                                                                                                                                                                                                                                                                                                                                                                                                                                                                                                                                                                                                                                                                                                                                                                                                                                                                  |      |     |      |      |     |      |     |      |     |      |                    |     |     |                                                             |     |     |     |     |  |
| Proactive engagement and reengagement of patients who miss clinic appointments and/or are lost to follow-up, including intensive outreach for those not engaged in care within 1 month of a new HIV diagnosis, is recommended.                                                                                                                                                   |                     |                                                                                                                                                                                                                                                                                                                                                                                                                                                                                                                                                                                                                                                                                                                                                                                                                                                                                                                                                                                                                                                                                                                                                                                                                                                                                                                                                                                                                                                                                                                                                                                                                                                                                                                                                  |      |     |      |      |     |      |     |      |     |      |                    |     |     |                                                             |     |     |     |     |  |
| Case management to retain PLHIV in care and to locate and reengage patients lost to follow-up is recommended. (B II) 28b. Transportation support for PLHIV to attend their clinic visits is recommended.                                                                                                                                                                         |                     |                                                                                                                                                                                                                                                                                                                                                                                                                                                                                                                                                                                                                                                                                                                                                                                                                                                                                                                                                                                                                                                                                                                                                                                                                                                                                                                                                                                                                                                                                                                                                                                                                                                                                                                                                  |      |     |      |      |     |      |     |      |     |      |                    |     |     |                                                             |     |     |     |     |  |
| Removing adult-assisted consent to HIV testing and counseling is recommended for minor adolescents with the capacity to consent. (B II) 30. Adolescent-centered services are recommended in both clinical and community-based settings.                                                                                                                                          |                     |                                                                                                                                                                                                                                                                                                                                                                                                                                                                                                                                                                                                                                                                                                                                                                                                                                                                                                                                                                                                                                                                                                                                                                                                                                                                                                                                                                                                                                                                                                                                                                                                                                                                                                                                                  |      |     |      |      |     |      |     |      |     |      |                    |     |     |                                                             |     |     |     |     |  |
| Informing an adolescent of his/her HIV-positive diagnosis is recommended as soon after diagnosis as feasible. (B II) 32. A transition plan between pediatric and adult HIV care is recommended.                                                                                                                                                                                  |                     |                                                                                                                                                                                                                                                                                                                                                                                                                                                                                                                                                                                                                                                                                                                                                                                                                                                                                                                                                                                                                                                                                                                                                                                                                                                                                                                                                                                                                                                                                                                                                                                                                                                                                                                                                  |      |     |      |      |     |      |     |      |     |      |                    |     |     |                                                             |     |     |     |     |  |
| <i>Metrics for and monitoring of the HIV care continuum</i>                                                                                                                                                                                                                                                                                                                      |                     |                                                                                                                                                                                                                                                                                                                                                                                                                                                                                                                                                                                                                                                                                                                                                                                                                                                                                                                                                                                                                                                                                                                                                                                                                                                                                                                                                                                                                                                                                                                                                                                                                                                                                                                                                  |      |     |      |      |     |      |     |      |     |      |                    |     |     |                                                             |     |     |     |     |  |
| A standardized method should be used to estimate the total number of PLHIV (diagnosed and undiagnosed) within a geographic setting.                                                                                                                                                                                                                                              |                     |                                                                                                                                                                                                                                                                                                                                                                                                                                                                                                                                                                                                                                                                                                                                                                                                                                                                                                                                                                                                                                                                                                                                                                                                                                                                                                                                                                                                                                                                                                                                                                                                                                                                                                                                                  |      |     |      |      |     |      |     |      |     |      |                    |     |     |                                                             |     |     |     |     |  |
| The estimated number of PLHIV in the geographic setting should be the overall denominator for the HIV care continuum.                                                                                                                                                                                                                                                            |                     |                                                                                                                                                                                                                                                                                                                                                                                                                                                                                                                                                                                                                                                                                                                                                                                                                                                                                                                                                                                                                                                                                                                                                                                                                                                                                                                                                                                                                                                                                                                                                                                                                                                                                                                                                  |      |     |      |      |     |      |     |      |     |      |                    |     |     |                                                             |     |     |     |     |  |
| Collection of a minimum set of 5 data elements should be considered to populate the HIV care continuum. Estimated number of PLHIV □ Number and proportion of PLHIV who are diagnosed as having HIV □ Number and proportion of PLHIV who are linked to care (optional) □ Number and proportion of PLHIV on ART □ Number and proportion of PLHIV on ART who are virally suppressed |                     |                                                                                                                                                                                                                                                                                                                                                                                                                                                                                                                                                                                                                                                                                                                                                                                                                                                                                                                                                                                                                                                                                                                                                                                                                                                                                                                                                                                                                                                                                                                                                                                                                                                                                                                                                  |      |     |      |      |     |      |     |      |     |      |                    |     |     |                                                             |     |     |     |     |  |
| Where possible, jurisdictions should consider longitudinal cohort measurement of HIV service utilization and treatment outcomes to identify the means to maximize viral suppression through ensuring early access to ART and retention in care.                                                                                                                                  |                     |                                                                                                                                                                                                                                                                                                                                                                                                                                                                                                                                                                                                                                                                                                                                                                                                                                                                                                                                                                                                                                                                                                                                                                                                                                                                                                                                                                                                                                                                                                                                                                                                                                                                                                                                                  |      |     |      |      |     |      |     |      |     |      |                    |     |     |                                                             |     |     |     |     |  |
| 29                                                                                                                                                                                                                                                                                                                                                                               | Ralph et al. (2010) | <p><i>Recommendation for Penile Fracture</i><br/>Imaging (cavernosography, US, or MRI) can be used for localization of the injury, while retrograde urethrogram (pre-/perioperative) can be performed if there is a suspicion of a urethral injury. The ultimate decision for surgery is based on clinical findings and once diagnosed, there is no indication for conservative management.</p> <p><i>Recommendation for Skin Loss Injuries</i><br/>There is evidence to support surgical replacement of shaft skin with either split, mesh, or full thickness skin.</p> <p><i>Recommendation for Penile Amputation</i><br/>Critical warm and cold ischemia time is unknown. Surgical reattachment is therefore a clinical decision and is best performed by an experienced microsurgeon. Psychological evaluation should be offered to patients who self-mutilate. If re-implantation fails or is impossible, patients should be referred for phalloplasty at an appropriate time interval.</p> <p><i>Definition of Gender Identity Disorder/ Transsexualism</i><br/>The desire for at least 2 years, to live and be accepted as a member of the opposite sex, usually accompanied by the wish to make his or her body as congruent as possible with the preferred sex through surgery and hormone therapy.</p> <p><i>Male-to-Female Genital Surgery</i><br/>Bilateral orchiectomy, amputation of the corpora cavernosa, creation of a neovaginal cavity that is lined by hairless skin, the formation of a sensate neoclitoris, and an aesthetic vulval appearance are the aims of genital surgery. The outcome may be achieved in one or two stages with satisfaction rates of 80% expected.</p> <p><i>Female-to-Male Genital Surgery</i></p> |      |     |      |      |     |      |     |      |     |      |                    |     |     |                                                             |     |     |     |     |  |

1

Breast reduction, oophorectomy, hysterectomy, and vaginectomy should be offered to all patients. There are many phalloplasty techniques involving local or free flaps and microsurgery. Patients should be warned that multiple stages are often needed with high urethral and prosthetic complication rates. However, a universal satisfaction rate of 80% should be expected. Metoidioplasty can be offered to those who wish to stand to void but do not want sexual intercourse.

*Penile Augmentation – Indications*

A stretched penile length of <7cm should be considered as a micropenis with many surgical techniques being recommended. The indications for augmentation in men with a normal-sized penis cannot be drawn from the literature

*Penile Augmentation – Surgical Techniques*

There are many lengthening techniques described with variable success rates. The complications may be significant. Stretching devices may be an alternative treatment option. All operative methods of girth enhancement have no proven efficacy outcome data. Liquid silicone injection should be discouraged. Psychological assessment should proceed any surgical approach

8  
12  
13  
14  
15  
16  
17  
18  
19  
20  
21  
22  
23  
24  
25  
26  
27  
28  
29  
30  
31  
32  
33  
34  
35  
36  
37  
38  
39  
40  
41  
42

Strang et al. (2016)

*Emergency intakes:*

If the adolescent presents in a state of emergency, as some gender dysphoria (GD) referrals do, then as in any assessment, the first priority is risk reduction/safety. Hospitalization may be necessary in extreme cases to prevent self-harm/mutilation, though psychiatric hospital units are often not equipped to work with gender dysphoric adolescents with autism spectrum disorders (ASD), and so outside consultation to the unit may be necessary. Ultimately, engaging a therapist with training (or consultation support) in both ASD and gender nonconformity/GD may be a critical step; helping a patient understand that relief is coming and that their gender-needs will be addressed may reduce safety risks, and support further assessment.

*ASD assessment:*

When an ASD diagnosis is suspected, it is important for an autism specialist to confirm the diagnosis, if a diagnosis has not been established. Whenever possible, a neuropsychological/autism evaluation should be conducted to evaluate the impact of ASD on an adolescent’s ability to understand and report GD symptoms as well as engage in therapy/treatments. Evaluations should include assessment of general cognitive skills, executive function skills (impulse control, flexibility, planning, future thinking), communication skills, emotional functioning, self-awareness/social cognition, and capacity for self-advocacy. Knowledge of the young person’s capacities will inform the GD diagnosis process (i.e., how to best obtain clinical/diagnostic information and understand that information), as well as deciding on clinical treatment options (i.e., the ability to understand treatments, comply with treatments, consider a range of gender possibilities vs. concrete/black-and-white thinking).

*Gender-related assessment:*

When gender issues are reported/suspected in an adolescent with ASD, a structured interview should be used to assess for gender dysphoria, including dysphoria over time, intensity of dysphoria, and its pervasiveness. Whenever possible, it is important to obtain additional report from other sources (e.g., parents), as communication, self-awareness, and self-advocacy skills may be vulnerable in adolescents with ASD. It is difficult to separate the assessment and treatment of many of these individuals, because assessment continues throughout the treatment process as the person may develop increased understanding of themselves and increased ability to express their wants and needs. Therefore, gender-related diagnostics may take more time. For some individuals, however, GD diagnosis is immediately clear, such as when the dysphoria has been present for an extended period, the young person is already presenting as a different gender, or when the level of urgency about gender transition is extreme.

*Treatment checklist (psychosocial and medical).*

Establish appropriate clinical team, ideally a clinician trained in both autism spectrum disorders (ASD) and gender nonconformity/ gender dysphoria (GNC/GD), or clinicians collaborating from each specialty. □

Address and assess intensity of gender feelings/urgency throughout the treatment process, as assessment often continues during treatment, informing and shaping the goals of the treatment. Key clinical questions:

- a. Is the GD clear, urgent, pervasive, and persistent over time (i.e., meeting full diagnostic criteria for GD)? If yes, consultation with medical transition services may be indicated (see “If medical transition is indicated” below).
- b. Does the GD increase or decrease with intervention (e.g., as adolescent develops increased social/self-awareness, executive function flexibility and big picture thinking skills, communication/self-advocacy skills)? □

Provide psycho-education about and explore the possibility of a range of gender outcomes (e.g., gender spectrum, incorporating aspects of a different gender without full gender transition, etc.) This may require specific approaches targeting ASD related deficits in cognitive flexibility (i.e., reducing all or nothing/black and white thinking). □

Provide structure, as necessary, for gender exploration, supporting the adolescent’s ability to explore gender transition, including clothing, name, pronouns, etc. Parents may need to assume a central role in helping facilitate an individual’s exploration of their gender when ASD-related weaknesses in daily living skills, planning and self-advocacy interfere with that

43  
44  
45  
46  
47



|    |  |                                                                                                                                                                                                                                                                                                                                                                                    |
|----|--|------------------------------------------------------------------------------------------------------------------------------------------------------------------------------------------------------------------------------------------------------------------------------------------------------------------------------------------------------------------------------------|
| 1  |  | <p>exploration. Such family support may include reminding a young person of their gender exploration therapy goals during the week, helping a young person to obtain appropriate clothing to try on, and so forth. □</p>                                                                                                                                                           |
| 2  |  | <p>Over the course of treatment, assess for signs that the adolescent's experience of GNC/GD is caused by comorbidities or symptoms of ASD (e.g., ASD preoccupations, misinterpreting sexual orientation for gender, etc.) If it becomes clear that a wish to transition is caused by a comorbidity or symptoms of ASD, explore alternative solutions to gender transition. □</p>  |
| 3  |  | <p>If medical transition is indicated during the process, ensure that a pediatric endocrinologist (or similar medical specialist) trained in GD is engaged in the treatment to discuss risks/benefits of pubertal blockade and/or cross sex hormones. The endocrinologist/medical specialist and other treatment providers (e.g., autism specialist) should collaborate around</p> |
| 4  |  | <p>diagnostics and treatments. If medical treatments begin, provide concrete psycho-education about treatment side effects, risks and benefits and ensure that these issues are understood</p>                                                                                                                                                                                     |
| 5  |  | <p>by the adolescent with concurrent GD and ASD. □</p>                                                                                                                                                                                                                                                                                                                             |
| 6  |  | <p>Consider the accessibility and appropriateness of adjunct gender and/or ASD-related supports/services. Provide support, coaching, and vetting as needed. For example, an LGBT youth</p>                                                                                                                                                                                         |
| 7  |  | <p>group leader may require some coaching in how to welcome and engage a person with ASD, and an autism skills group provider may require support in how to work with a GD/gender</p>                                                                                                                                                                                              |
| 8  |  | <p>nonconforming adolescent.</p>                                                                                                                                                                                                                                                                                                                                                   |
| 9  |  | <p>1. We advise that HCPs when working with trans people recognize the diversity of genders, including male, female, and nonbinary individuals.</p>                                                                                                                                                                                                                                |
| 10 |  | <p>2. We advise that HCPs when working with trans people openly ask for the individual gender experience of the person seeking treatment, including which pronouns and name they like</p>                                                                                                                                                                                          |
| 11 |  | <p>to be addressed with, and recognize this may change in the future.</p>                                                                                                                                                                                                                                                                                                          |
| 12 |  | <p>3. We advise that HCPs when working with trans people critically reflect upon discriminatory factors influencing both access to and outcomes of gender-related health-care services and</p>                                                                                                                                                                                     |
| 13 |  | <p>make the necessary changes to accommodate all trans individuals.</p>                                                                                                                                                                                                                                                                                                            |
| 14 |  | <p>4. We advise that HCPs when working with trans people should critically reflect on their own possible prejudices, ethics, and power positions.</p>                                                                                                                                                                                                                              |
| 15 |  | <p>5. We advise that HCPs when working with adult trans people should explain the result of the clinical assessment with the aim of a shared understanding and shared responsibility.</p>                                                                                                                                                                                          |
| 16 |  | <p>6. We advise that HCPs assessing gender diverse children and adolescents support the exploration and expression of the youth's experienced gender and help to reduce experienced</p>                                                                                                                                                                                            |
| 17 |  | <p>barriers for those seeking care.</p>                                                                                                                                                                                                                                                                                                                                            |
| 18 |  | <p>7. We advise that HCPs assessing gender diverse children and adolescents take a developmental approach that includes that gender-related developmental pathways may be more</p>                                                                                                                                                                                                 |
| 19 |  | <p>open to change in prepubescent gender diverse children than in pubescent gender diverse adolescents and adults.</p>                                                                                                                                                                                                                                                             |
| 20 |  | <p>8. We advise that HCPs assessing gender diverse children and adolescents assess resilience and vulnerabilities and treat (or refer for treatment) possible mental health problems.</p>                                                                                                                                                                                          |
| 21 |  | <p>9. We advise that HCPs assessing gender diverse children and adolescents support parents and/or legal guardian and school and other important social networks (when possible) to</p>                                                                                                                                                                                            |
| 22 |  | <p>provide a safe and accepting home and school environment.</p>                                                                                                                                                                                                                                                                                                                   |
| 23 |  | <p>10. For prepubescent gender diverse children who desire to live in a role consistent with their experienced gender identity, we advise the HCPs advise that parents and the social</p>                                                                                                                                                                                          |
| 24 |  | <p>environment consider social transitioning of the child after discussing the pros and the cons and while providing continuous psychological support.</p>                                                                                                                                                                                                                         |
| 25 |  | <p>11. For pubertal gender diverse adolescents, we advise that HCPs inform and explore all nonmedical and medical options, including the effect that GAMIs (puberty blockers, hormones</p>                                                                                                                                                                                         |
| 26 |  | <p>as well as surgical) may have on sexuality and fertility and if indicated, facilitate GAMIs.</p>                                                                                                                                                                                                                                                                                |
| 27 |  | <p>12. In countries requiring an assessment process including a clinical diagnosis to access GAMI, we advise that HCPs assessing trans adolescents for GAMI have the expertise in</p>                                                                                                                                                                                              |
| 28 |  | <p>reaching the required diagnosis for their health service</p>                                                                                                                                                                                                                                                                                                                    |
| 29 |  | <p>13. We advise that HCPs working with trans people should inform trans adults seeking GAMI of its effect and assess the capacity of the individual to reach an informed consent</p>                                                                                                                                                                                              |
| 30 |  | <p>regarding GAMI.</p>                                                                                                                                                                                                                                                                                                                                                             |
| 31 |  | <p>14. We advise that, in view of the strong evidence regarding the high levels of mental health problems in adults presenting at trans health services, particularly in those not on hormone</p>                                                                                                                                                                                  |
| 32 |  | <p>treatment, HCPs whose role is informing and assessing the capacity to consent for GAMI in trans people wishing these interventions should have expertise in mental health to be able to</p>                                                                                                                                                                                     |
| 33 |  | <p>identify those requiring further support from mental health professionals to allow for the best possible outcome of GAMI.</p>                                                                                                                                                                                                                                                   |
| 34 |  | <p>15. We advise that HCPs whose role is informing and assessing the capacity to consent for GAMI in trans people wishing these interventions should explore resilience and social</p>                                                                                                                                                                                             |
| 35 |  | <p>support, in view of its association with health-related quality of life and psychological well-being.</p>                                                                                                                                                                                                                                                                       |
| 36 |  | <p>16. We advise that HCPs whose role is informing and assessing the capacity to consent for GAMI in trans people wishing these interventions should inform clients about the effect that</p>                                                                                                                                                                                      |
| 37 |  | <p>GAMIs (hormones and surgical) may have on sexual health and fertility. 17. In countries requiring an assessment process including a clinical diagnosis to access GAMI, we advise that</p>                                                                                                                                                                                       |
| 38 |  | <p>HCPs assessing trans adults for GAMI have the expertise in reaching the required diagnosis for their health service.</p>                                                                                                                                                                                                                                                        |
| 39 |  | <p>18. We advise initiating pubertal hormone suppression in trans adolescents, when gender incongruence or nonconformity is assessed, interfering psychosocial difficulties are addressed</p>                                                                                                                                                                                      |
| 40 |  | <p>if possible, and after they show their first pubertal changes (Tanner stage G2) and when they have sufficient capacity to give informed consent.</p>                                                                                                                                                                                                                            |
| 41 |  |                                                                                                                                                                                                                                                                                                                                                                                    |
| 42 |  |                                                                                                                                                                                                                                                                                                                                                                                    |
| 43 |  |                                                                                                                                                                                                                                                                                                                                                                                    |
| 44 |  |                                                                                                                                                                                                                                                                                                                                                                                    |
| 45 |  |                                                                                                                                                                                                                                                                                                                                                                                    |
| 46 |  |                                                                                                                                                                                                                                                                                                                                                                                    |
| 47 |  |                                                                                                                                                                                                                                                                                                                                                                                    |

1

|                                                                                                                          |                                                                                                                                                                                                                                                                                                                                                                                                                                                                                                                                                                                                                                                                                                                                                                                                                                                                                                                                                                                                                                                                                                                                                                                                                                                                                                                                                                                                                                                                                                                                                                                                                                                                                                                                                                                                                                                                                                                                                                                                                                                                                                                                                                                                                                                                                                                                                                                                                                                                                                                                                                                                                                                                                                                                                                                                                                                                                                                                                                                                                                                                                                                                                                                                                                   |
|--------------------------------------------------------------------------------------------------------------------------|-----------------------------------------------------------------------------------------------------------------------------------------------------------------------------------------------------------------------------------------------------------------------------------------------------------------------------------------------------------------------------------------------------------------------------------------------------------------------------------------------------------------------------------------------------------------------------------------------------------------------------------------------------------------------------------------------------------------------------------------------------------------------------------------------------------------------------------------------------------------------------------------------------------------------------------------------------------------------------------------------------------------------------------------------------------------------------------------------------------------------------------------------------------------------------------------------------------------------------------------------------------------------------------------------------------------------------------------------------------------------------------------------------------------------------------------------------------------------------------------------------------------------------------------------------------------------------------------------------------------------------------------------------------------------------------------------------------------------------------------------------------------------------------------------------------------------------------------------------------------------------------------------------------------------------------------------------------------------------------------------------------------------------------------------------------------------------------------------------------------------------------------------------------------------------------------------------------------------------------------------------------------------------------------------------------------------------------------------------------------------------------------------------------------------------------------------------------------------------------------------------------------------------------------------------------------------------------------------------------------------------------------------------------------------------------------------------------------------------------------------------------------------------------------------------------------------------------------------------------------------------------------------------------------------------------------------------------------------------------------------------------------------------------------------------------------------------------------------------------------------------------------------------------------------------------------------------------------------------------|
| 2<br>3<br>4<br>5<br>6<br>7<br>8<br>9<br>10<br>11<br>12<br>13<br>14<br>15<br>16<br>17<br>18<br>19<br>20<br>21<br>22<br>23 | <p>19. We advise in adolescents desiring masculinizing hormone treatment, when they have sufficient capacity to give informed consent, puberty induction with testosterone, often using a gradually increasing dose schedule.</p> <p>20. We advise that before initiation of gonadotropin-releasing hormone analogs (GnRHa) or progestogen and/or testosterone, the hormone-prescribing physician should screen for conditions that may worsen with the start of treatment.</p> <p>21. If masculinization is desired, we advise testosterone therapy with monitoring of serum sex steroid levels and signs of virilization.</p> <p>22. We advise the hormone-prescribing physician discusses the effects and possible adverse health effects of GnRHa, progestogen, and/or testosterone treatment, including fertility preservation options, based on the person's goals before any hormonal intervention.</p> <p>23. We advise informing trans subjects on the expected changes upon GnRHa, progestogen, and/or testosterone initiation on its effect on body satisfaction and on sexual function (desire and activity) and considering the role that factors such as relationship status and possible surgical interventions will play.</p> <p>24. We advise initiating pubertal hormone suppression in trans adolescents, when gender incongruence or nonconformity is assessed, interfering psychosocial difficulties are addressed if possible, and after they show their first pubertal changes (Tanner stage G2) and when they have sufficient capacity to give informed consent.</p> <p>25. We advise in adolescents desiring feminizing hormone treatment, when they have sufficient capacity to give informed consent, puberty induction with 17beta-estradiol, often using a gradually increasing dose schedule.</p> <p>26. We advise that before initiation of GnRHa or antiandrogen and/or estrogen treatment, the hormone-prescribing physician needs to screen for conditions that may worsen with the start of treatment.</p> <p>27. If feminization is desired, we advise estrogens and/or antiandrogen therapy with monitoring of serum sex steroid levels and signs of feminization.</p> <p>28. We advise the hormone-prescribing physician discusses the effects and possible adverse health effects of GnRHa, antiandrogen, and/or estrogen treatment, including fertility preservation options and consequences for genital surgery, based on the person's goals before any hormonal intervention.</p> <p>29. We advise informing trans clients on the expected changes upon GnRHa, estrogen, and/or anti-androgen initiation and its effect on body satisfaction, sexual desire and activity and considering the role factors such as relationship status and possible surgical interventions can play</p> <p>30. We advise HCPs should be aware of potential sexual problems during all surgical phases of treatment.</p> <p>31. We advise that regardless of surgical pathways, HCPs should be aware of diversity in sexual practices in trans people.</p> <p>32. We advise that surgeons performing GAS collaborate with sexologists with knowledge and experience with trans people, if available.</p> |
| 24<br>25<br>26<br>27<br>28<br>29<br>30<br>31<br>32<br>33<br>34<br>35<br>36<br>37<br>38<br>39<br>40<br>41<br>42           | <p>WHO (2011)</p> <p><i>Recommendations on human rights and non-discrimination in health-care settings</i></p> <p>1. Legislators and other government authorities should establish antidiscrimination and protective laws, derived from international human rights standards, in order to eliminate discrimination and violence faced by MSM and transgender people, and reduce their vulnerability to infection with HIV, and the impacts of HIV and AIDS.</p> <p>2. Health services should be made inclusive of MSM and transgender people, based on the principles of medical ethics and the right to health.</p> <p><i>Recommendations on HIV prevention, care and treatment</i></p> <p><i>Prevention of sexual transmission</i></p> <p>3. Using condoms consistently during anal intercourse is strongly recommended for MSM and transgender people over not using condoms.</p> <p>4. Using condoms consistently is strongly recommended over serosorting for HIV-negative MSM and transgender people. Serosorting is suggested over not using condoms by HIV-negative MSM and transgender people under specific circumstances as a harm reduction strategy.</p> <p>5. Not offering adult male circumcision to MSM and transgender people for the prevention of HIV and STI is suggested over offering it</p> <p>6. Offering HIV testing and counselling to MSM and transgender people is strongly recommended over not offering this intervention</p> <p>7. Offering community-based HIV testing and counselling linked to care and treatment to MSM and transgender people is strongly recommended over not offering such programmes</p> <p><i>Behavioural interventions, information, education, communication</i></p> <p>8. Implementing individual-level behavioural interventions for the prevention of HIV and STIs among MSM and transgender people is suggested over not implementing such interventions.</p> <p>9. Implementing community-level behavioural interventions for the prevention of HIV and STIs among MSM and transgender people is suggested over not implementing such interventions.</p> <p>10. Offering targeted internet-based information to decrease risky sexual behaviours and increase uptake of HIV testing and counselling among MSM and transgender people is suggested over not offering such information.</p> <p>11. Using social marketing strategies to increase the uptake of HIV/STI testing and counselling and HIV services among MSM and transgender people is suggested over not using such</p>                                                                                                                                                                                                                                                                                                                                                                                                                                                                                                                                                                                                                                                                                |

43

44

45

46

47

1

2

3

4

5

6

7

8

9

10

11

12

13

14

15

16

17

18

19

20

21

22

23

24

25

26

27

28

29

30

31

32

33

34

35

36

37

38

39

40

41

42

43

44

45

46

47

|            |  |                                                                                                                                                                                                                                                                                                                                                                                                                                                                                                                                                                                                                                                                                                                                                                                                                                                                                                                                                                                                                                                                                                                                                                                                                                                                                                                                                                                                                                                                                                                                                                                                                                                                                                                                                                                                                                                                                                                                                                                                                                                                                                                                                                                                                                                                                                                                                                                                                                                                                                                                                                                                    |
|------------|--|----------------------------------------------------------------------------------------------------------------------------------------------------------------------------------------------------------------------------------------------------------------------------------------------------------------------------------------------------------------------------------------------------------------------------------------------------------------------------------------------------------------------------------------------------------------------------------------------------------------------------------------------------------------------------------------------------------------------------------------------------------------------------------------------------------------------------------------------------------------------------------------------------------------------------------------------------------------------------------------------------------------------------------------------------------------------------------------------------------------------------------------------------------------------------------------------------------------------------------------------------------------------------------------------------------------------------------------------------------------------------------------------------------------------------------------------------------------------------------------------------------------------------------------------------------------------------------------------------------------------------------------------------------------------------------------------------------------------------------------------------------------------------------------------------------------------------------------------------------------------------------------------------------------------------------------------------------------------------------------------------------------------------------------------------------------------------------------------------------------------------------------------------------------------------------------------------------------------------------------------------------------------------------------------------------------------------------------------------------------------------------------------------------------------------------------------------------------------------------------------------------------------------------------------------------------------------------------------------|
|            |  | <p>strategies.</p> <p>12. Implementing sex venue-based outreach strategies to decrease risky sexual behaviour and increase uptake of HIV testing and counselling among MSM and transgender people is suggested over not implementing such strategies.</p> <p>Substance use and prevention of bloodborne infections</p> <p>13. MSM and transgender people with harmful alcohol or other substance use should have access to evidence-based brief psychosocial interventions involving assessment, specific feedback and advice.</p> <p>14. MSM and transgender people who inject drugs should have access to needle and syringe programmes and opioid substitution therapy.</p> <p>15. Transgender people who inject substances for gender enhancement should use sterile injecting equipment and practise safe injecting behaviours to reduce the risk of infection with bloodborne pathogens such as HIV, hepatitis B and hepatitis C.</p> <p><i>HIV care and treatment</i></p> <p>16. MSM and transgender people living with HIV should have the same access to ART as other populations. ART should be initiated at CD4 counts of <math>\leq 350</math> cells/mm<sup>3</sup> (and for those in WHO clinical stage 3 or 4 if CD4 testing is not available). Access should also include management of opportunistic infections, co-morbidities and treatment failure.</p> <p>17. MSM and transgender people living with HIV should have access to essential interventions to prevent illness and HIV transmission including, but not limited to, care and support and antiretroviral therapy.</p> <p><i>Recommendations on prevention and care of other sexually transmitted infections</i></p> <p>18. MSM and transgender people with symptomatic STIs should seek and be offered syndromic management and treatment.</p> <p>19. Offering periodic testing for asymptomatic urethral and rectal <i>N. gonorrhoeae</i> and <i>C. trachomatis</i> infections using NAAT is suggested over not offering such testing for MSM and transgender people. Not offering periodic testing for asymptomatic urethral and rectal <i>N. gonorrhoeae</i> infections using culture is suggested over offering such testing for MSM and transgender people.</p> <p>20. Offering periodic serological testing for asymptomatic syphilis infection to MSM and transgender people is strongly recommended over not offering such screening</p> <p>21. MSM and transgender people should be included in catch-up HBV immunization strategies in settings where infant immunization has not reached full coverage</p> |
| WHO (2012) |  | <p>1: In countries where HIV transmission occurs among serodiscordant couples, where discordant couples can be identified and where additional HIV prevention choices for them are needed, daily oral PrEP (specifically tenofovir or the combination of tenofovir and emtricitabine) may be considered as a possible additional intervention for the uninfected partner.</p> <p>2: In countries where HIV transmission occurs among men and transgender women who have sex with men and additional HIV prevention choices for them are needed, daily oral PrEP (specifically the combination of tenofovir and emtricitabine) may be considered as a possible additional intervention.</p>                                                                                                                                                                                                                                                                                                                                                                                                                                                                                                                                                                                                                                                                                                                                                                                                                                                                                                                                                                                                                                                                                                                                                                                                                                                                                                                                                                                                                                                                                                                                                                                                                                                                                                                                                                                                                                                                                                         |
| WHO (2016) |  | <p><i>HIV prevention</i></p> <p>1 The correct and consistent use of condoms with condom-compatible lubricants is recommended for all key populations to prevent sexual transmission of HIV and sexually transmitted infections (STIs).</p> <p>2 Oral pre-exposure prophylaxis (PrEP) containing tenofovir disoproxil fumarate (TDF) should be offered as an additional prevention choice for key populations at substantial risk of HIV infection as part of combination HIV prevention approaches.</p> <p>3 Post-exposure prophylaxis (PEP) should be available to all eligible people from key populations on a voluntary basis after possible exposure to HIV.</p> <p>4 Voluntary medical male circumcision (VMMC) is recommended as an additional important strategy for the prevention of heterosexually acquired HIV infection in men, particularly in settings with hyperendemic and generalized HIV epidemics and low prevalence of male circumcision.</p> <p><i>Harm reduction</i></p> <p>5 All people from key populations who inject drugs should have access to sterile injecting equipment through needle and syringe programmes.</p> <p>6 All people from key populations who are dependent on opioids should be offered and have access to opioid substitution therapy in keeping with WHO guidance.</p> <p>7 All people from key populations with harmful alcohol or other substance use should have access to evidence-based interventions, including brief psychosocial interventions involving assessment, specific feedback and advice.</p> <p>8 People likely to witness an opioid overdose should have access to naloxone and be instructed in its use for emergency management of suspected opioid overdose.</p> <p><i>HIV testing and counselling (HTC)</i></p> <p>9 Voluntary HTC should be routinely offered to all key populations both in the community and in clinical settings. Community-based HIV testing and counselling for key populations, linked to prevention, care and treatment services, is recommended, in addition to provider-initiated testing and counselling.</p> <p><i>HIV treatment and care</i></p>                                                                                                                                                                                                                                                                                                                                                                                                                                              |

1

|    |                                                                                                                                                                                      |
|----|--------------------------------------------------------------------------------------------------------------------------------------------------------------------------------------|
| 2  | 10 Key populations living with HIV should have the same access to antiretroviral therapy (ART) and to ART management as other populations.                                           |
| 3  | 11 All pregnant women from key populations should have the same access to services for prevention of mother-to-child transmission of HIV (PMTCT) and follow the same                 |
| 4  | recommendations as women in other populations.                                                                                                                                       |
| 5  | <i>Prevention and management of coinfections and co-morbidities</i>                                                                                                                  |
| 6  | 12 Key populations should have the same access to tuberculosis prevention, screening and treatment services as other populations at risk of or living with HIV.                      |
| 7  | 13 Key populations should have the same access to hepatitis B and C prevention, screening and treatment services as other populations at risk of or living with HIV.                 |
| 8  | 14 Routine screening and management of mental health disorders (depression and psychosocial stress) should be provided for people from key populations living with HIV in order to   |
| 9  | optimize health outcomes and improve their adherence to ART. Management can range from co-counselling for HIV and depression to appropriate medical therapies.                       |
| 10 | <i>Sexual and reproductive health</i>                                                                                                                                                |
| 11 | 15 Screening, diagnosis and treatment of sexually transmitted infections should be offered routinely as part of comprehensive HIV prevention and care for key populations.           |
| 12 | 16 People from key populations, including those living with HIV, should be able to experience full, pleasurable sex lives and have access to a range of reproductive options.        |
| 13 | 17 Abortion laws and services should protect the health and human rights of all women, including those from key populations.                                                         |
| 14 | 18 It is important to offer cervical cancer screening to all women from key populations, as indicated in the WHO 2013 cervical cancer screening guidelines.                          |
| 15 | 19 It is important that all women from key populations have the same support and access to services related to conception and pregnancy care, as indicated by WHO guidelines, as     |
| 16 | women from other populations.                                                                                                                                                        |
| 17 | <i>Critical enablers</i>                                                                                                                                                             |
| 18 | 1 Laws, policies and practices should be reviewed and revised where necessary, and countries should work towards decriminalization of behaviours such as drug use/injecting, sex     |
| 19 | work, same-sex activity and non-conforming gender identity and toward elimination of the unjust application of civil law and regulations against people who use/inject drugs, sex    |
| 20 | workers, men who have sex with men and transgender people.                                                                                                                           |
| 21 | 2 Countries should work towards implementing and enforcing antidiscrimination and protective laws, derived from human rights standards, to eliminate stigma, discrimination and      |
| 22 | violence against people from key populations.                                                                                                                                        |
| 23 | 3 Health services should be made available, accessible and acceptable to key populations, based on the principles of medical ethics, avoidance of stigma, non-discrimination and the |
| 24 | right to health.                                                                                                                                                                     |
| 25 | 4 Programmes should work toward implementing a package of interventions to enhance community empowerment among key populations.                                                      |
| 26 | 5 Violence against people from key populations should be prevented and addressed in partnership with key population led organizations. All violence against people from key          |
| 26 | populations should be monitored and reported, and redress mechanisms should be established to provide justice                                                                        |

27 **Key:** {text}, appeared in corrected version; AIDS acquired immune deficiency syndrome; ART, antiretroviral therapy; CD4, T-cell; ECDC, European Centre for Disease Prevention and  
 28 Control; FtM, female to male; GAMI, gender affirming medical intervention; GAS, gender affirming surgery; HBV, hepatitis B virus; HCV, hepatitis C virus; HCP, health care  
 29 professional; HIV, human immunodeficiency virus; MSM, men who have sex with men; MtF, male to female; PWID people who inject drugs; STI, sexually transmitted infection; WHO,  
 30 World Health Organization.

31  
32  
33  
34  
35  
36  
37  
38  
39  
40  
41  
42  
43  
44  
45  
46  
47

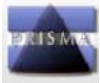

# PRISMA 2009 Checklist

| Section/topic                      | #  | Checklist item                                                                                                                                                                                                                                                                                              | Reported on page # |
|------------------------------------|----|-------------------------------------------------------------------------------------------------------------------------------------------------------------------------------------------------------------------------------------------------------------------------------------------------------------|--------------------|
| <b>TITLE</b>                       |    |                                                                                                                                                                                                                                                                                                             |                    |
| Title                              | 1  | Identify the report as a systematic review, meta-analysis, or both.                                                                                                                                                                                                                                         | 1                  |
| <b>ABSTRACT</b>                    |    |                                                                                                                                                                                                                                                                                                             |                    |
| Structured summary                 | 2  | Provide a structured summary including, as applicable: background; objectives; data sources; study eligibility criteria, participants, and interventions; study appraisal and synthesis methods; results; limitations; conclusions and implications of key findings; systematic review registration number. | 3-4                |
| <b>INTRODUCTION</b>                |    |                                                                                                                                                                                                                                                                                                             |                    |
| Rationale                          | 3  | Describe the rationale for the review in the context of what is already known.                                                                                                                                                                                                                              | 6-9                |
| Objectives                         | 4  | Provide an explicit statement of questions being addressed with reference to participants, interventions, comparisons, outcomes, and study design (PICOS).                                                                                                                                                  | 10, 12             |
| <b>METHODS</b>                     |    |                                                                                                                                                                                                                                                                                                             |                    |
| Protocol and registration          | 5  | Indicate if a review protocol exists, if and where it can be accessed (e.g., Web address), and, if available, provide registration information including registration number.                                                                                                                               | 9                  |
| Eligibility criteria               | 6  | Specify study characteristics (e.g., PICOS, length of follow-up) and report characteristics (e.g., years considered, language, publication status) used as criteria for eligibility, giving rationale.                                                                                                      | 10                 |
| Information sources                | 7  | Describe all information sources (e.g., databases with dates of coverage, contact with study authors to identify additional studies) in the search and date last searched.                                                                                                                                  | 10-11              |
| Search                             | 8  | Present full electronic search strategy for at least one database, including any limits used, such that it could be repeated.                                                                                                                                                                               | W1 (Suppl)         |
| Study selection                    | 9  | State the process for selecting studies (i.e., screening, eligibility, included in systematic review, and, if applicable, included in the meta-analysis).                                                                                                                                                   | 10-12              |
| Data collection process            | 10 | Describe method of data extraction from reports (e.g., piloted forms, independently, in duplicate) and any processes for obtaining and confirming data from investigators.                                                                                                                                  | 12                 |
| Data items                         | 11 | List and define all variables for which data were sought (e.g., PICOS, funding sources) and any assumptions and simplifications made.                                                                                                                                                                       | N/A (in AGREE)     |
| Risk of bias in individual studies | 12 | Describe methods used for assessing risk of bias of individual studies (including specification of whether this was done at the study or outcome level), and how this information is to be used in any data synthesis.                                                                                      | AGREE              |
| Summary measures                   | 13 | State the principal summary measures (e.g., risk ratio, difference in means).                                                                                                                                                                                                                               | 12                 |
| Synthesis of results               | 14 | Describe the methods of handling data and combining results of studies, if done, including measures of consistency (e.g., $I^2$ ) for each meta-analysis.                                                                                                                                                   | N/A                |

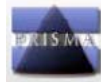

# PRISMA 2009 Checklist

1  
2  
3  
4  
5  
6  
7  
8  
9  
10  
11  
12  
13  
14  
15  
16  
17  
18  
19  
20  
21  
22  
23  
24  
25  
26  
27  
28  
29  
30  
31  
32  
33  
34  
35  
36  
37  
38  
39  
40  
41  
42  
43  
44  
45  
46  
47

| Section/topic                 | #  | Checklist item                                                                                                                                                                                           | Reported on page #    |
|-------------------------------|----|----------------------------------------------------------------------------------------------------------------------------------------------------------------------------------------------------------|-----------------------|
| Risk of bias across studies   | 15 | Specify any assessment of risk of bias that may affect the cumulative evidence (e.g., publication bias, selective reporting within studies).                                                             | Within AGREE          |
| Additional analyses           | 16 | Describe methods of additional analyses (e.g., sensitivity or subgroup analyses, meta-regression), if done, indicating which were pre-specified.                                                         | None                  |
| <b>RESULTS</b>                |    |                                                                                                                                                                                                          |                       |
| Study selection               | 17 | Give numbers of studies screened, assessed for eligibility, and included in the review, with reasons for exclusions at each stage, ideally with a flow diagram.                                          | 14 & Figure 1         |
| Study characteristics         | 18 | For each study, present characteristics for which data were extracted (e.g., study size, PICOS, follow-up period) and provide the citations.                                                             | 14-19, Table 1, W3,W4 |
| Risk of bias within studies   | 19 | Present data on risk of bias of each study and, if available, any outcome level assessment (see item 12).                                                                                                | Table 2               |
| Results of individual studies | 20 | For all outcomes considered (benefits or harms), present, for each study: (a) simple summary data for each intervention group (b) effect estimates and confidence intervals, ideally with a forest plot. | 19-24, Table 2        |
| Synthesis of results          | 21 | Present results of each meta-analysis done, including confidence intervals and measures of consistency.                                                                                                  | 19-24                 |
| Risk of bias across studies   | 22 | Present results of any assessment of risk of bias across studies (see Item 15).                                                                                                                          | N/A                   |
| Additional analysis           | 23 | Give results of additional analyses, if done (e.g., sensitivity or subgroup analyses, meta-regression [see Item 16]).                                                                                    | None                  |
| <b>DISCUSSION</b>             |    |                                                                                                                                                                                                          |                       |
| Summary of evidence           | 24 | Summarize the main findings including the strength of evidence for each main outcome; consider their relevance to key groups (e.g., healthcare providers, users, and policy makers).                     | 24                    |
| Limitations                   | 25 | Discuss limitations at study and outcome level (e.g., risk of bias), and at review-level (e.g., incomplete retrieval of identified research, reporting bias).                                            | 24-25                 |
| Conclusions                   | 26 | Provide a general interpretation of the results in the context of other evidence, and implications for future research.                                                                                  | 25-29                 |
| <b>FUNDING</b>                |    |                                                                                                                                                                                                          |                       |
| Funding                       | 27 | Describe sources of funding for the systematic review and other support (e.g., supply of data); role of funders for the systematic review.                                                               | 30                    |

From: Moher D, Liberati A, Tetzlaff J, Altman DG, The PRISMA Group (2009). Preferred Reporting Items for Systematic Reviews and Meta-Analyses: The PRISMA Statement. PLoS Med 6(7): e1000097. doi:10.1371/journal.pmed1000097

For more information, visit: [www.prisma-statement.org](http://www.prisma-statement.org).
